# Supplementary material
Source: publisher figshare collection journal article supplement (https://tandf.figshare.com/articles/dataset/_/12366461)
Supplement: Supplementary file 1 [file 2]

Archive with 4 entries (4 files):
- tbsd_a_1772885_sm0537.gif
- tbsd_a_1772885_sm0536.gif
- tbsd_a_1772885_sm0535.xlsx
- tbsd_a_1772885_sm0534.pdf
