# Supplementary material
Source: publisher figshare collection journal article supplement (https://tandf.figshare.com/articles/dataset/_/12366461)
Supplement: Supplementary file 1 [file 2 › tbsd_a_1772885_sm0534.pdf]

# Supplementary Material

## Repurposing approved drugs as inhibitors of SARS-CoV-2 S-protein from molecular modeling and virtual screening

Osmair Vital de Oliveira<sup>a\*</sup>, Gerd B. Rocha<sup>b</sup>, Andrew S. Paluch<sup>c</sup> and Luciano T. Costa<sup>d</sup>

<sup>a</sup>Instituto Federal de Educação, Ciência e Tecnologia de São Paulo, Campus Catanduva, CEP: 15.808-305, Catanduva, SP, Brasil

<sup>b</sup>Departamento de Química, Universidade Federal da Paraíba, Cidade Universitária, João Pessoa - PB, CEP: 58051-085, Brasil.

<sup>c</sup>Department of Chemical, Paper, and Biomedical Engineering, Miami University, Oxford, OH 45056, USA

<sup>d</sup>MolMod-CS, Instituto de Química, Universidade Federal Fluminense - Outeiro de São João Batista, s/n CEP:24020-141, Niterói, Rio de Janeiro, CEP: 24210-000, Brazil

\*Corresponding authors: Osmair V. Oliveira (osmairvital@gmail.com)

Telephone number: +55 (17) 3524-9718

### Abstract

Herein, molecular modeling techniques were used with the main goal to obtain candidates from a drug database as potential targets to be used against SARS-CoV-2. This novel coronavirus, responsible by the COVID-19 outbreak since the end of 2019, became a challenge since there is not vaccine for this disease. The first step in this investigation was to solvate the isolated S-protein in water for molecular dynamics (MD) simulation, being observed a transition from “up” to “down” conformation of receptor-binding domain (RBD) of the S-protein with angle of 54.3 and 43.0 degrees, respectively. The RBD region was more exposed to the solvent and to the possible drugs due to its enhanced surface area. From the equilibrated MD structure, virtual screening by docking calculations were performed using a library contained 9091 FDA approved drugs. Among them, 24 best-scored ligands (14 traditional herbal isolate and 10 approved drugs) with the binding energy below  $-8.1$  kcal/mol were selected as potential candidates to inhibit the SARS-CoV-2 S-protein, preventing the human cell infection and their replication. For instance, the ivermectin drug (present in our list of promise candidates) was recently used successful to control viral replication *in vitro*. MD simulations were performed for the three best ligands@S-protein complexes and the binding energies were calculated using the MM/PBSA approach. Overall, it is highlighted an important strategy, some key residues, and chemical groups which may be considered on clinical trials for COVID-19 outbreak.

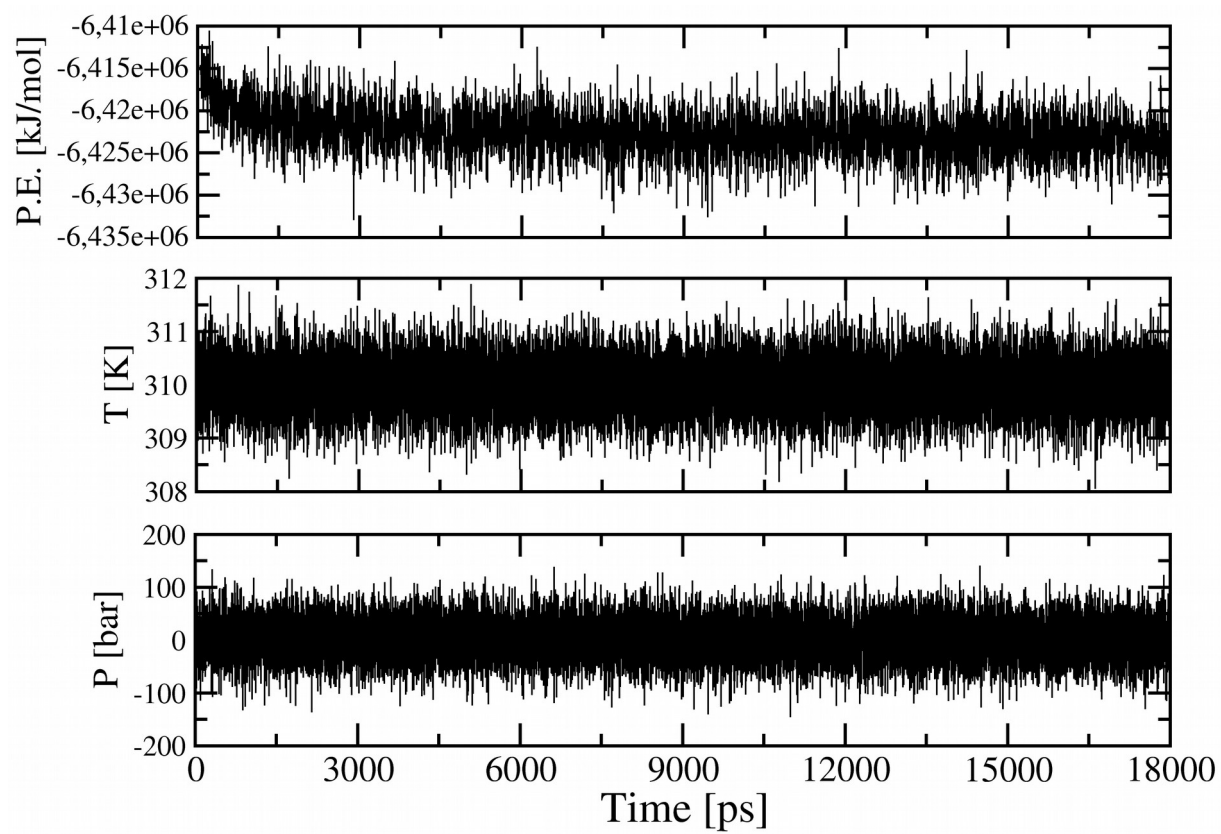

Figure S1. Potential energy (P.E.), temperature (T) and pressure (P) obtained as a function of the simulation time.

Lig5429

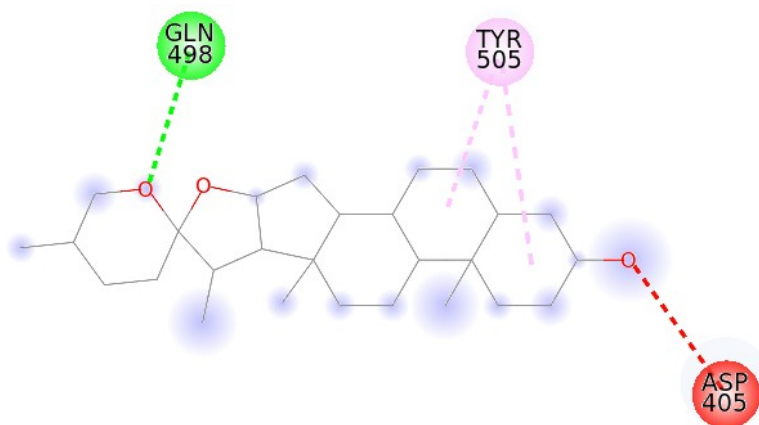

Lig6629

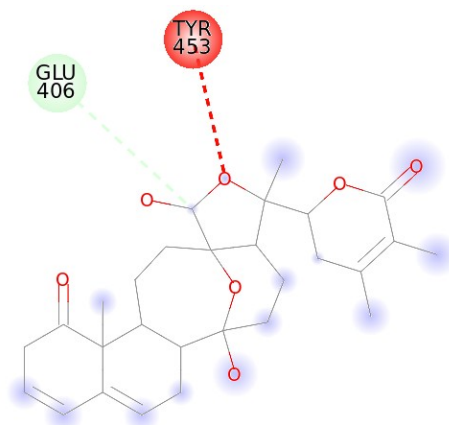

Lig6843

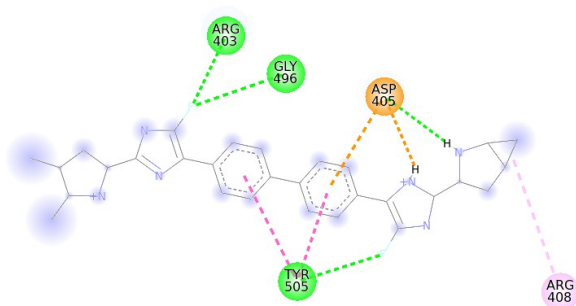

Lig6982

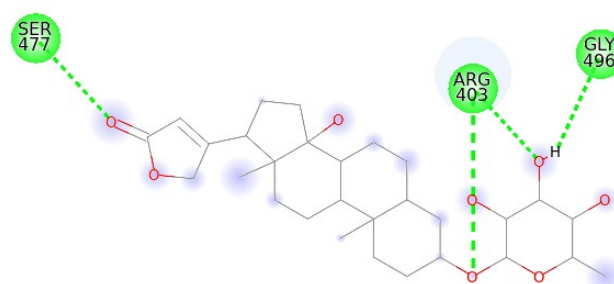

Lig7028

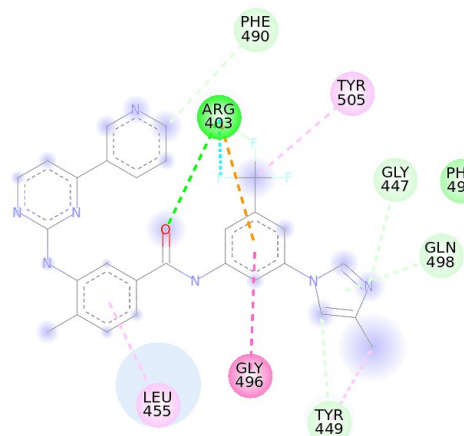

Lig7089

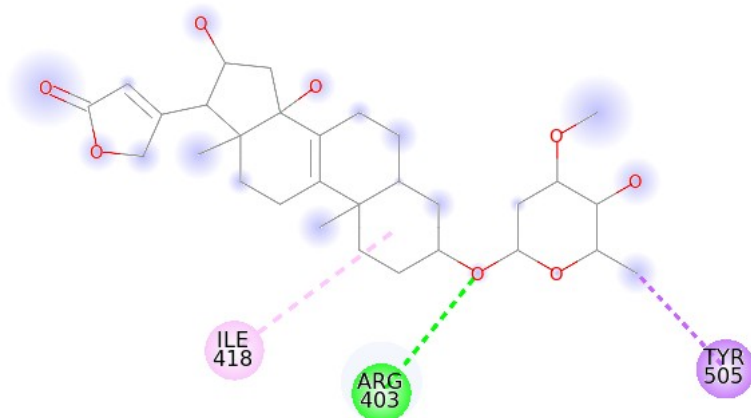

Lig7435

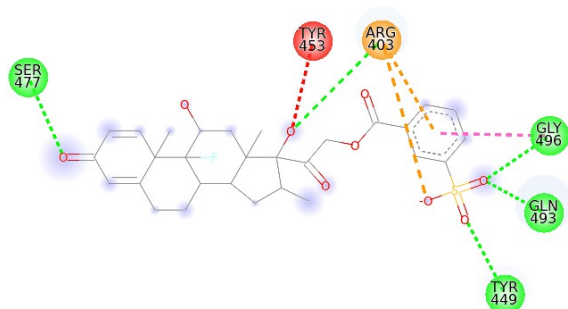

Lig7527

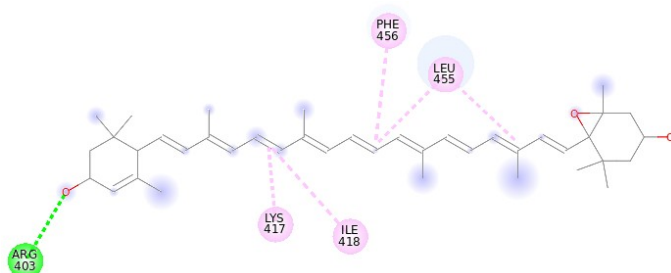

Lig7798

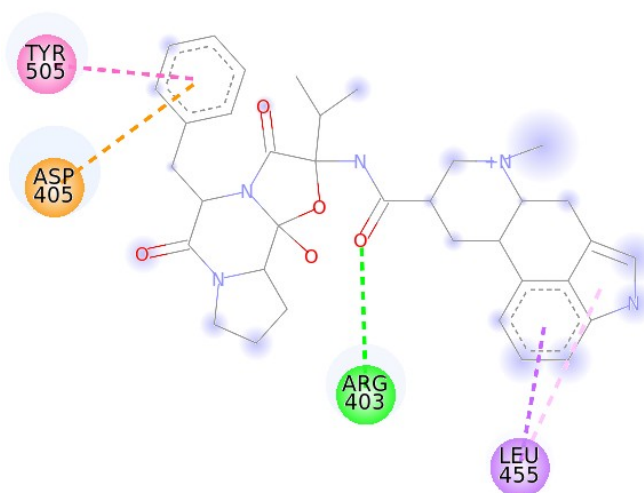

Lig7081

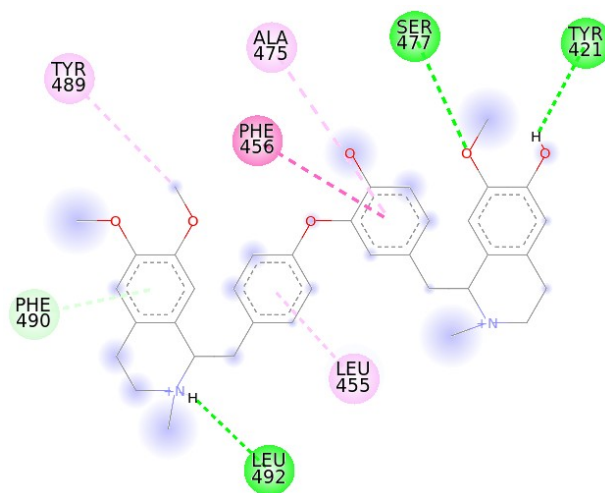

Lig7875

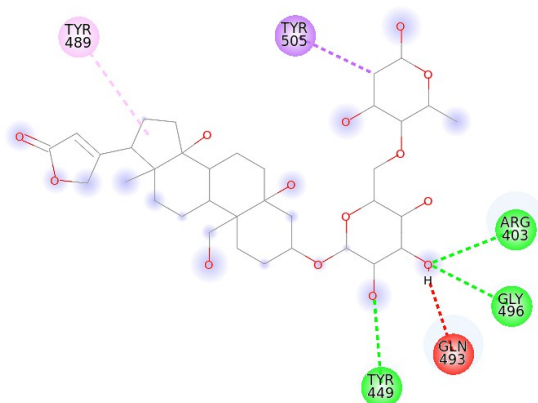

Lig8121

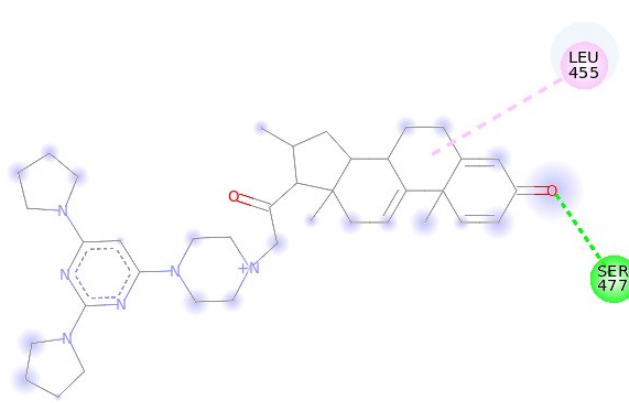

Lig8148

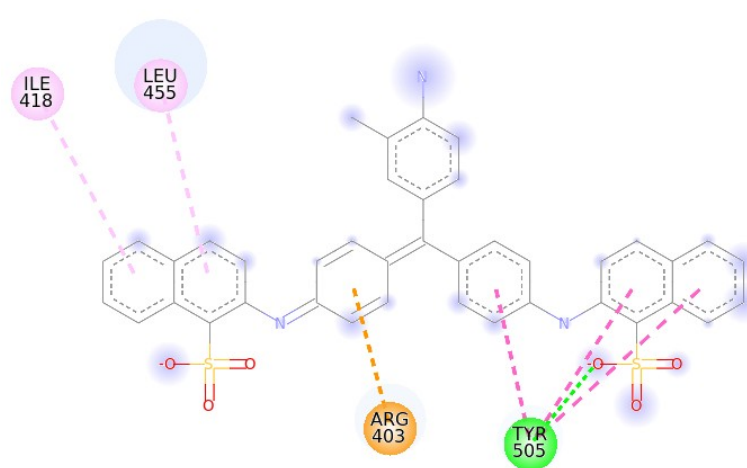

Lig8152

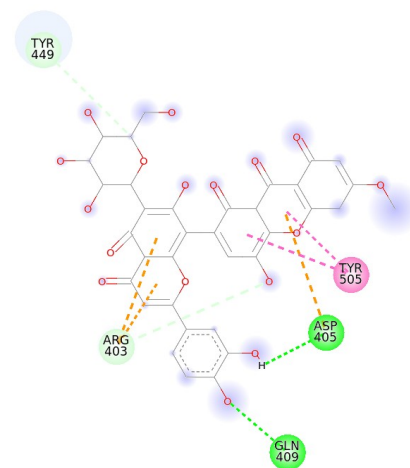

Lig8283

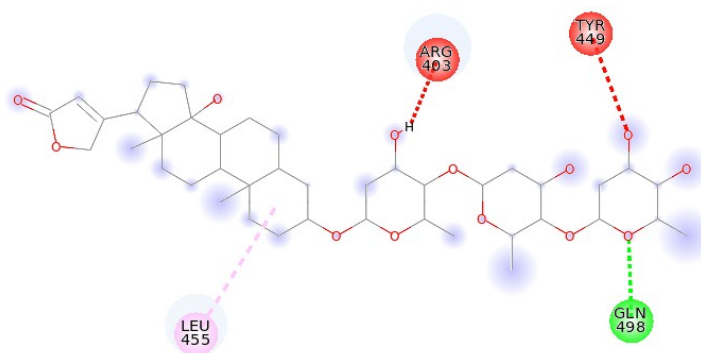

Lig8301

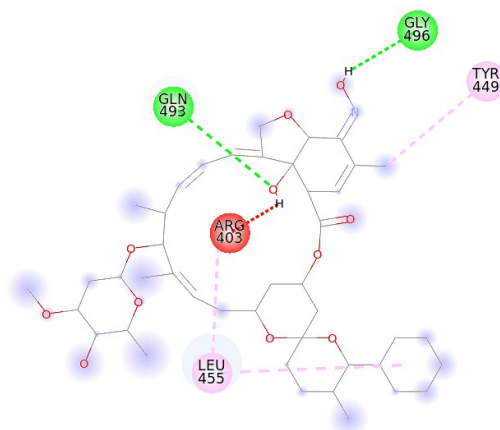

Lig8395

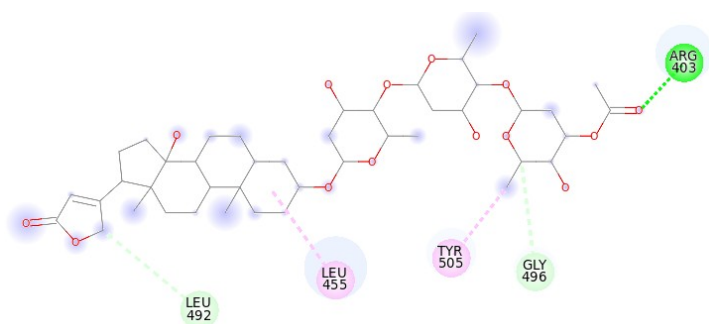

Lig8402

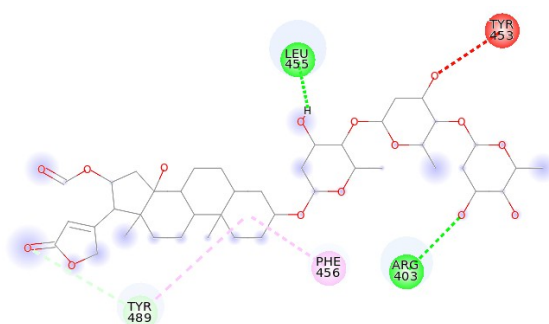

Lig8522

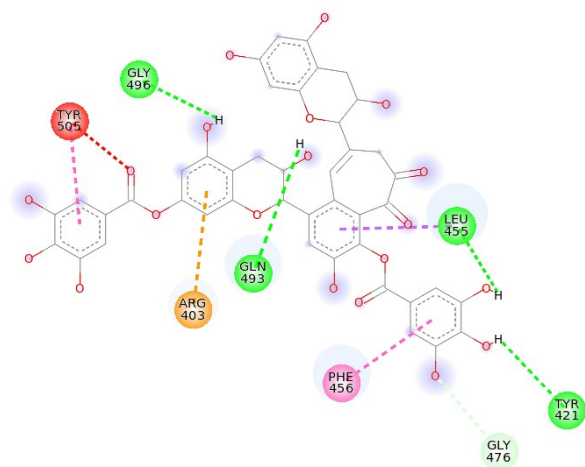

Lig8541

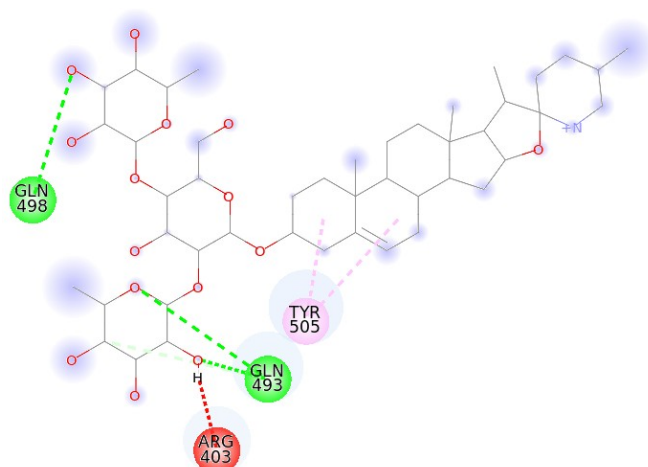

Lig8568

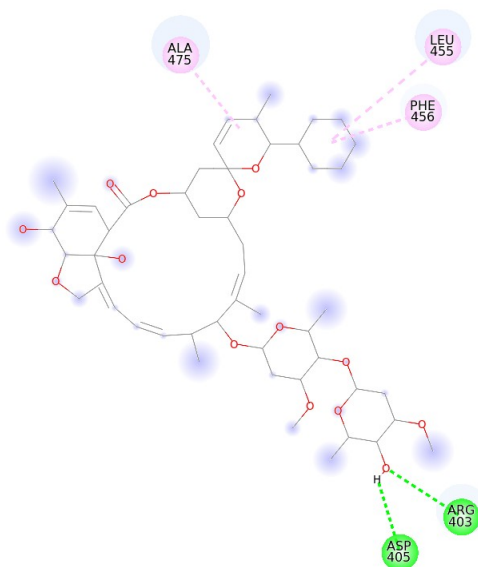

Lig8726

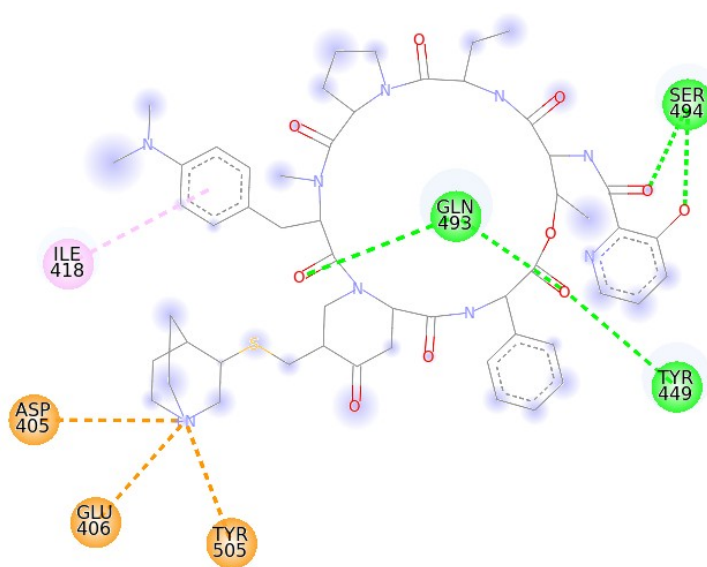

Lig8757

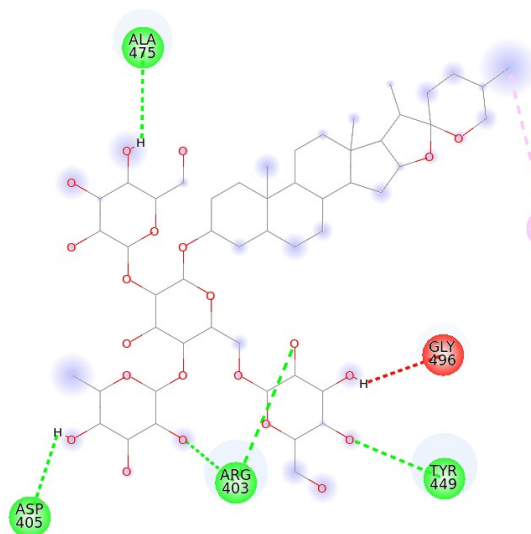

Lig8970

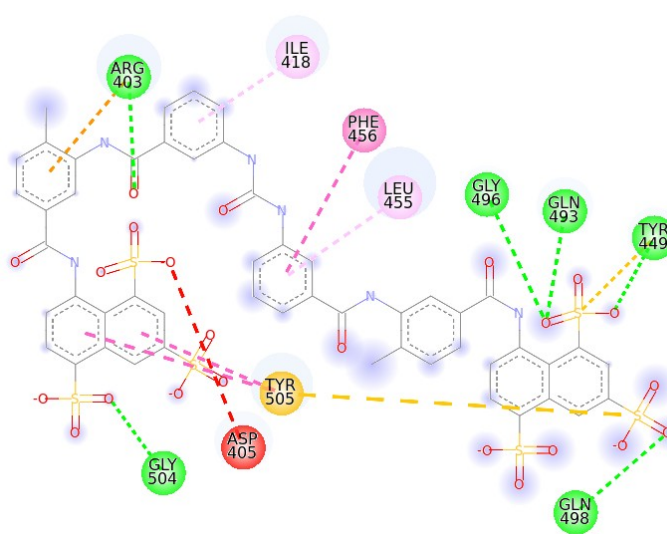

Azithromycin

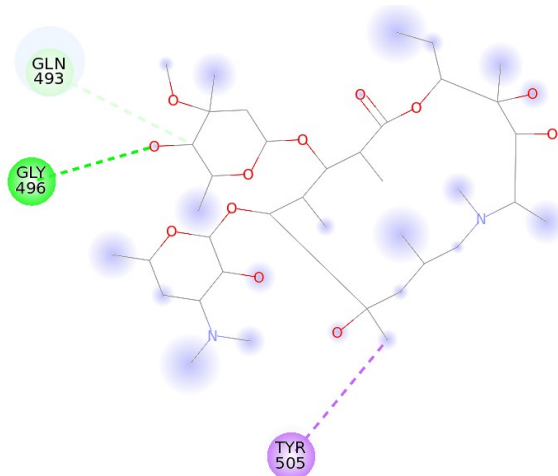

Ivermectin

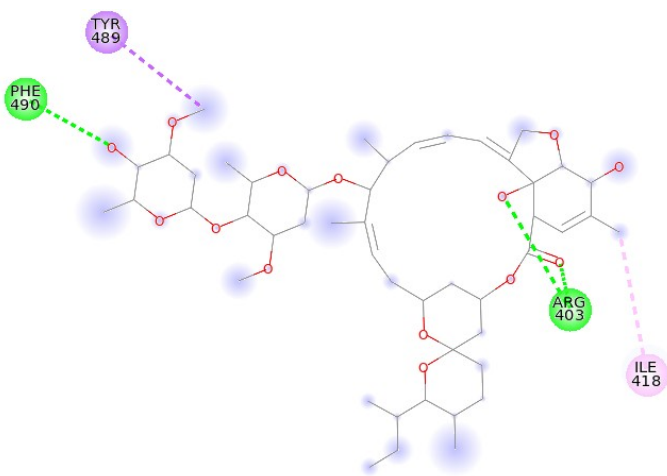

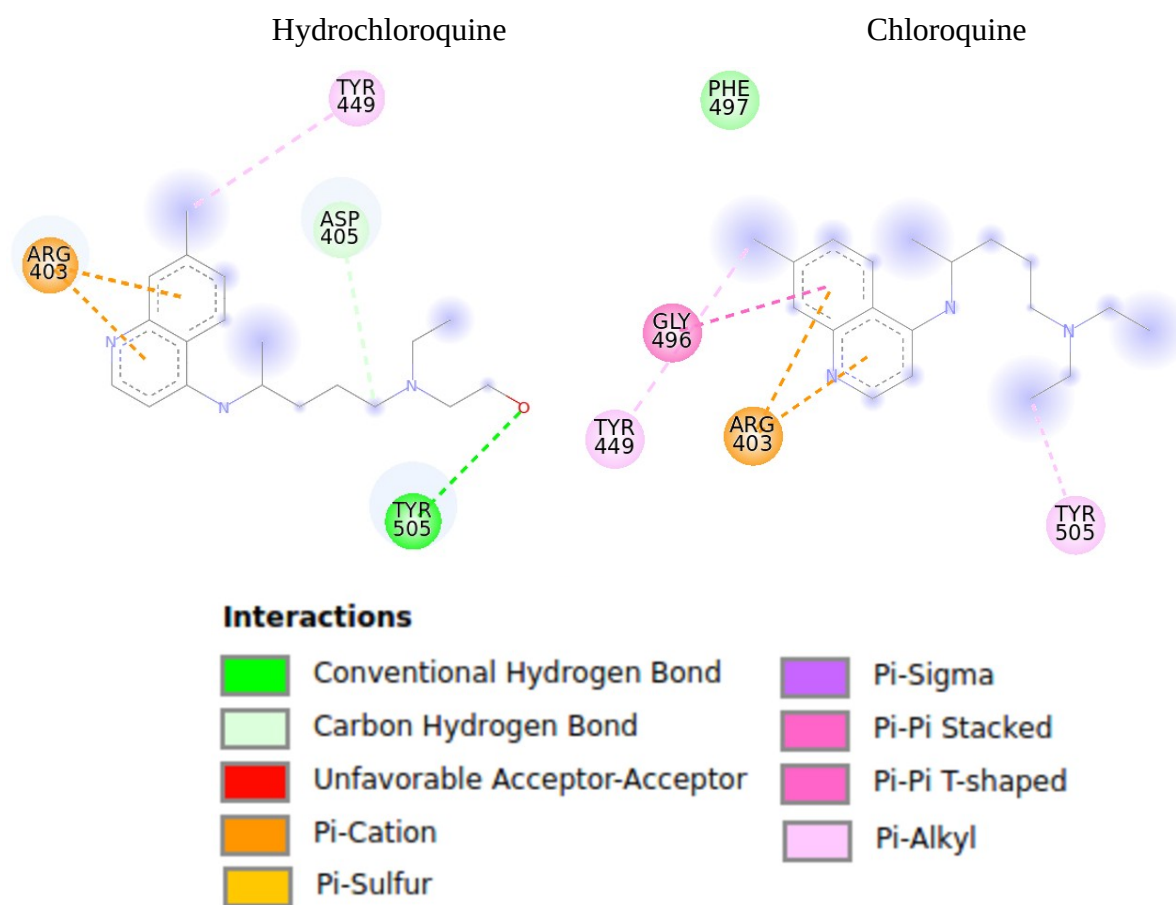

Figure S2. 2D ligand interaction diagram and molecular electrostatic map (MEP) of the best docking poses.
