# Supplementary material
Source: publisher figshare collection journal article supplement (https://tandf.figshare.com/articles/dataset/_/12366461)
Supplement: Supplementary file 1 [file 2 › tbsd_a_1772885_sm0535.xlsx]

## Sheet: Sheet2
Internal Ligand ID	SMILES	Name (Obtained from the SWEETLEAD Database, See (https://simtk.org/home/sweetlead)	Scored ligands (kcal/mol)
8522	O=C(Oc1cc(O)c2c(O[C@@H]([C@@H](O)C2)C=2C=3C(C(OC(=O)c4cc(O)c(O)c(O)c4)=C(O)C=2)=C([O-])C(=O)C=C([C@@H]2[C@@H](O)Cc4c(O)cc(O)cc4O2)C=3)c1)c1cc(O)c(O)c(O)c1	Traditional Herbal Isolate=teaflavin a	-8.7
8970	S(=O)(=O)([O-])c1c2c(NC(=O)c3cc(NC(=O)c4cc(NC(=O)Nc5cc(C(=O)Nc6c(C)ccc(C(=O)Nc7c8c(S(=O)(=O)[O-])cc(S(=O)(=O)[O-])cc8c(S(=O)(=O)[O-])cc7)c6)ccc5)ccc4)c(C)cc3)ccc(S(=O)(=O)[O-])c2cc(S(=O)(=O)[O-])c1	WHO Essential Medicine=suramin sodium	-8.7
6843	Fc1c(-c2ccc(-c3ccc(C4=C(F)N[C@H]([C@@H]5N[C@@H]6[C@H](C5)C6)[N+H2]4)cc3)cc2)nc([C@H]2[N+H2][C@H](C)[C@H](C)C2)[nH]1	Indian Approved Name=5-hydroxytrytophan	-8.6
7015	O=C1C2(O)C34[C@](C)(O1)[C@H]1OC(=O)[C@@H]5[C@@](C)([C@H]3C(=O)C(O4)(OC5)[C@H]3[C@H]([C@@]4(C)C(=O)C=CCC54OC5C3)CC2)C1	Traditional Herbal Isolate=physalin b	-8.6
7017	O=C1C2(O)C34[C@](C)(O1)[C@@H]1OC(=O)[C@H]5[C@](C)([C@H]3C(=O)C(O4)(OC5)[C@H]3[C@@H]([C@]4(C)C(=O)C=CCC54OC5C3)CC2)C1	Traditional Herbal Isolate=physalin b	-8.6
7012	O=C1C2(O)C34[C@@](C)(O1)[C@@H]1OC(=O)[C@@H]5[C@](C)([C@H]3C(=O)C(O4)(OC5)[C@H]3[C@@H]([C@@]4(C)C(=O)C=CCC54OC5C3)CC2)C1	Traditional Herbal Isolate=physalin b	-8.5
8541	O([C@H]1[C@H](O)[C@H](O[C@H]2[C@@H](O)[C@@H](O)[C@@H](O)[C@@H](C)O2)[C@H](CO)O[C@H]1O[C@H]1CC=2[C@@](C)([C@@H]3[C@@H]([C@@H]4[C@](C)([C@H]5[C@@H](C)[C@]6(O[C@H]5C4)[N+H2]C[C@H](C)CC6)CC3)CC=2)CC1)[C@H]1[C@@H](O)[C@@H](O)[C@@H](O)[C@@H](C)O1	Traditional Herbal Isolate=solamargine;beta-solamargine	-8.5
6842	Fc1c(-c2ccc(-c3ccc(C4=C(F)N[C@H]([C@@H]5N[C@@H]6[C@H](C5)C6)[N+H2]4)cc3)cc2)nc([C@H]2[N+H2][C@@H](C)[C@H](C)C2)[nH]1	Indian Approved Name=5-hydroxytrytophan	-8.4
7527	O[C@H]1C=C(C)[C@@H](/C=C/C(=C/C=C\C(=C/C=C/C=C(\C=C/C=C(/C=C/[C@@]23C(C)(C)C[C@@H](O)C[C@]2(C)O3)\C)/C)\C)/C)C(C)(C)C1	Traditional Herbal Isolate=taraxanthin	-8.4
8148	S(=O)(=O)([O-])c1c(/N=C/2\C=C/C(=C(\c3cc(C)c(N)cc3)/c3ccc(Nc4c(S(=O)(=O)[O-])c5c(cc4)cccc5)cc3)/C=C\2)ccc2c1cccc2	Traditional Herbal Isolate=anthranil acid	-8.4
6982	O([C@@H]1[C@H](O)[C@H](O)[C@@H](O)[C@H](C)O1)[C@@H]1C[C@H]2[C@@](C)([C@H]3[C@@H]([C@]4(O)[C@](C)([C@H](C5=CC(=O)OC5)CC4)CC3)CC2)CC1	Traditional Herbal Isolate=evomonoside	-8.3
7018	O=C1C2(O)C34[C@](C)(O1)[C@@H]1OC(=O)[C@H]5[C@](C)([C@H]3C(=O)C(O4)(OC5)[C@@H]3[C@H]([C@@]4(C)C(=O)C=CCC54OC5C3)CC2)C1	Traditional Herbal Isolate=physalin b	-8.3
7798	O=C(N[C@@]1(C(C)C)C(=O)N2[C@@H](Cc3ccccc3)C(=O)N3[C@H]([C@]2(O)O1)CCC3)[C@H]1C[N+@@H](C)[C@@H]2[C@@H](c3c4c([nH]cc4C2)ccc3)C1	NPC Approved Name=dihydroergocristine mesylate (Ergoloid)	-8.3
8757	O(C[C@H]1[C@@H](O[C@H]2[C@@H](O)[C@@H](O)[C@@H](O)[C@@H](C)O2)[C@@H](O)[C@H](O[C@H]2[C@@H](O)[C@H](O)[C@H](O)[C@H](CO)O2)[C@H](O[C@@H]2C[C@H]3[C@](C)([C@@H]4[C@@H]([C@@H]5[C@](C)([C@H]6[C@@H](C)[C@]7(O[C@H]6C5)OC[C@@H](C)CC7)CC4)CC3)CC2)O1)[C@H]1[C@@H](O)[C@H](O)[C@H](O)[C@H](CO)O1	Traditional Herbal Isolate=smilacin	-8.3
6629	O=C1C(C)=C(C)C[C@@H]([C@]2(C)O[C@H](O)C34O[C@](O)([C@H]5[C@H]([C@@]6(C)C(=O)CC=CC6=CC5)CC3)CCC24)O1	Traditional Herbal Isolate=withaphysalin	-8.2
6979	O([C@@H]1[C@H](O)[C@H](O)[C@@H](O)[C@@H](C)O1)[C@@H]1C[C@H]2[C@@](C)([C@@H]3[C@H]([C@]4(O)[C@](C)([C@H](C5=CC(=O)OC5)CC4)CC3)CC2)CC1	Traditional Herbal Isolate=evomonoside	-8.2
6986	O([C@@H]1[C@@H](O)[C@H](O)[C@@H](O)[C@H](C)O1)[C@@H]1C[C@H]2[C@@](C)([C@H]3[C@@H]([C@]4(O)[C@](C)([C@H](C5=CC(=O)OC5)CC4)CC3)CC2)CC1	Traditional Herbal Isolate=evomonoside	-8.2
8121	O(C[C@H]1[C@H](O)[C@@H](O)[C@@H](O)[C@H](O[C@@H]2C[C@]3(O)[C@@](CO)([C@@H]4[C@@H]([C@]5(O)[C@@](C)([C@H](C6=CC(=O)OC6)CC5)CC4)CC3)CC2)O1)[C@@H]1[C@H](C)O[C@H](O)C[C@H]1O	Traditional Herbal Isolate=erysimosol	-8.2
8726	S(C[C@@H]1C(=O)C[C@H]2C(=O)N[C@H](c3ccccc3)C(=O)O[C@H](C)[C@@H](NC(=O)c3c(O)cccn3)C(=O)N[C@@H](CC)C(=O)N3[C@@H](C(=O)N(C)[C@@H](Cc4ccc(N(C)C)cc4)C(=O)N2C1)CCC3)[C@H]1C2CC[N+H](C1)CC2	FDA Approved Drug=QUINUPRISTIN	-8.2
5429	O[C@@H]1C[C@@H]2[C@](C)([C@H]3[C@H]([C@H]4[C@](C)([C@H]5[C@H](C)C6(O[C@H]5C4)OC[C@H](C)CC6)CC3)CC2)CC1	Traditional Herbal Isolate=tigogenin;sarsasapogenin	-8.1
6984	O([C@@H]1[C@H](O)[C@@H](O)[C@@H](O)[C@H](C)O1)[C@@H]1C[C@H]2[C@@](C)([C@H]3[C@@H]([C@]4(O)[C@](C)([C@H](C5=CC(=O)OC5)CC4)CC3)CC2)CC1	Traditional Herbal Isolate=evomonoside	-8.1
7028	FC(F)(F)c1cc(NC(=O)c2cc(Nc3nc(-c4cnccc4)ccn3)c(C)cc2)cc(-n2cc(C)nc2)c1	Australia Approved Name=NILOTINIB FDA Approved Drug=NILOTINIB HYDROCHLORIDE MONOHYDRATE	-8.1
7089	O(C)[C@H]1[C@@H](O)[C@@H](C)O[C@H](O[C@@H]2C[C@H]3[C@@](C)([C@@H]4[C@H]([C@]5(O)[C@](C)([C@@H]([C@@H](O)C5)C5=CC(=O)OC5)CC4)CC3)CC2)C1	Traditional Herbal Isolate=deacetylo-leandrin	-8.1
7276	C(=C\C=C\C=C(/C=C\C=C(\C=C\[C@@]12C(C)(C)CCC[C@]1(C)O2)/C)\C)(\C=C/C=C(/C=C/[C@@H]1C(C)=CCCC1(C)C)\C)/C	Traditional Herbal Isolate=alpha-carotene-5 6-epoxide	-8.1
7435	S(=O)(=O)([O-])c1cc(C(=O)OCC(=O)[C@@]2(O)[C@H](C)C[C@@H]3[C@@]2(C)C[C@@H](O)[C@@]2(F)[C@@]4(C)C(=CC(=O)C=C4)CC[C@H]32)ccc1	NPC Approved Name=dexamethasone-21-sulfobenzoate	-8.1
7801	O(C)c1c(OC)cc2c([C@@H](Cc3ccc(Oc4c(O)ccc(C[C@H]5[N+@H](C)CCc6c5cc(OC)c(O)c6)c4)cc3)[N+@H](C)CC2)c1	Traditional Herbal Isolate=dauricinoline	-8.1
7875	O=C(C[N+H]1CCN(c2nc(N3CCCC3)nc(N3CCCC3)c2)CC1)[C@H]1[C@H](C)C[C@@H]2[C@]1(C)CC=C1[C@@]3(C)C(=CC(=O)C=C3)CC[C@H]21	NPC Approved Name=tirilazad	-8.1
8152	O(C)c1cc([O-])c2C(=O)c3c([O-])c(-c4c(O)c([C@H]5[C@H](O)[C@@H](O)[C@H](O)[C@H](CO)O5)c([O-])c5C(=O)C=C(c6cc(O)c(O)cc6)Oc45)cc(O)c3Oc2c1	Traditional Herbal Isolate=swertifrancheside	-8.1
8283	O([C@H]1[C@H](C)O[C@H](O[C@@H]2C[C@H]3[C@@](C)([C@H]4[C@H]([C@]5(O)[C@](C)([C@H](C6=CC(=O)OC6)CC5)CC4)CC3)CC2)C[C@H]1O)[C@H]1O[C@@H](C)[C@H](O[C@@H]2O[C@@H](C)[C@H](O)[C@H](O)C2)[C@H](O)C1	Traditional Herbal Isolate=digitoxin FDA Approved Drug=DIGITOXIN	-8.1
8301	O(C)[C@@H]1[C@@H](O)[C@@H](C)O[C@@H](O[C@H]/2[C@H](C)/C=C/C=C/3\[C@@]4(O)[C@H](/C(=N/O)/C(C)=C[C@H]4C(=O)O[C@H]4C[C@@]5(O[C@@H]([C@@H](C)CC5)C5CCCCC5)O[C@@H](C4)C/C=C\2/C)OC\3)C1	NPC Approved Name=selamectin	-8.1
8395	O=C(O[C@H]1[C@@H](O)[C@H](C)O[C@@H](O[C@@H]2[C@H](C)O[C@H](O[C@H]3[C@H](C)O[C@H](O[C@H]4C[C@H]5[C@@](C)([C@H]6[C@H]([C@]7(O)[C@](C)([C@H](C8=CC(=O)OC8)CC7)CC6)CC5)CC4)C[C@H]3O)C[C@H]2O)C1)C	FDA Approved Drug=ACETYLDIGITOXIN	-8.1
8402	O=CO[C@@H]1[C@H]([C@]2(C)[C@@](O)([C@H]3[C@@H]([C@]4(C)[C@@H](C[C@H](O[C@H]5O[C@H](C)[C@@H](O[C@H]6O[C@@H](C)[C@@H](O[C@@H]7O[C@H](C)[C@@H](O)[C@H](O)C7)[C@@H](O)C6)[C@H](O)C5)CC4)CC3)CC2)C1)C1=CC(=O)OC1	Traditional Herbal Isolate=gitaloxin	-8.1
8568	O(C)[C@@H]1[C@@H](O[C@@H]2O[C@H](C)[C@H](O)[C@@H](OC)C2)[C@@H](C)O[C@@H](O[C@@H]/2[C@@H](C)/C=C/C=C/3\[C@@]4(O)[C@H]([C@@H](O)C(C)=C[C@H]4C(=O)O[C@@H]4C[C@]5(O[C@H]([C@@H](C)C=C5)C5CCCCC5)O[C@H](C4)C/C=C\2/C)OC\3)C1	NPC Approved Name=doramectin	-8.1
8544	O(C)[C@@H]1[C@@H](O[C@@H]2O[C@H](C)[C@H](O)[C@@H](OC)C2)[C@@H](C)O[C@@H](O[C@H]/2[C@H](C)/C=C/C=C/3\[C@@]4(O)[C@H]([C@@H](O)C(C)=C[C@H]4C(=O)O[C@H]4C[C@@]5(O[C@@H]([C@@H](CC)C)[C@H](C)CC5)O[C@@H](C4)C/C=C\2/C)OC\3)C1	WHO Essential Medicine=ivermectin Indian Approved Name=ivermectin FDA Approved Drug=IVERMECTIN	-8.1
5389	O(C)c1c([C@H]2[C@@H](O)[C@H](O)[C@H](O)CO2)c2OC(c3ccc(O)cc3)=CC(=O)c2c([O-])c1	Traditional Herbal Isolate=molludistin	-8.0
5957	O=C([O-])c1cc(C=2C(=O)/C(=N\NC=3C(=O)N(c4cc(C)c(C)cc4)NC=3C)/C=CC=2)ccc1	FDA Approved Drug=ELTROMBOPAG OLAMINE	-8.0
6301	O(C)c1c(O)ccc(C=2Oc3c([C@H]4[C@@H](O)[C@@H](O)[C@@H](O)[C@H](CO)O4)c(O)cc([O-])c3C(=O)C=2)c1	Traditional Herbal Isolate=scoparin	-8.0
6376	Clc1c(C2=NCC3=[N+H]/C(=C/[N+H]4CCN(C)CC4)/C(=O)N3c3c2cc([N+](=O)[O-])cc3)cccc1	US Illegal/Scheduled Drug (Schedule 4)=Loprazolam	-8.0
6625	O=C1C(C)=C(C)C[C@@H]([C@@]2(C)O[C@H](O)C34O[C@](O)([C@@H]5[C@@H]([C@@]6(C)C(=O)CC=CC6=CC5)CC3)CCC24)O1	Traditional Herbal Isolate=withaphysalin	-8.0
6627	O=C1C(C)=C(C)C[C@@H]([C@@]2(C)O[C@H](O)C34O[C@](O)([C@H]5[C@@H]([C@@]6(C)C(=O)CC=CC6=CC5)CC3)CCC24)O1	Traditional Herbal Isolate=withaphysalin	-8.0
6798	O=C1c2c([O-])cc(O)c3c4c(O)cc([O-])c5C(=O)c6c([O-])cc(C)c7c8c(C)cc([O-])c1c8c(c(c45)c67)c23	Traditional Herbal Isolate=hypericin	-8.0
6976	O([C@@H]1[C@H](O)[C@H](O)[C@@H](O)[C@@H](C)O1)[C@@H]1C[C@H]2[C@@](C)([C@@H]3[C@@H]([C@]4(O)[C@](C)([C@H](C5=CC(=O)OC5)CC4)CC3)CC2)CC1	Traditional Herbal Isolate=evomonoside	-8.0
7011	O=C1C2(O)C34[C@](C)(O1)[C@H]1OC(=O)[C@@H]5[C@](C)([C@H]3C(=O)C(O4)(OC5)[C@H]3[C@@H]([C@@]4(C)C(=O)C=CCC54OC5C3)CC2)C1	Traditional Herbal Isolate=physalin b	-8.0
7019	O=C1C2(O)C34[C@@](C)(O1)[C@H]1OC(=O)[C@H]5[C@@](C)([C@H]3C(=O)C(O4)(OC5)[C@H]3[C@H]([C@@]4(C)C(=O)C=CCC54OC5C3)CC2)C1	Traditional Herbal Isolate=physalin b	-8.0
7087	O(C)[C@@H]1[C@@H](O)[C@@H](C)O[C@H](O[C@@H]2C[C@H]3[C@@](C)([C@@H]4[C@H]([C@]5(O)[C@](C)([C@@H]([C@@H](O)C5)C5=CC(=O)OC5)CC4)CC3)CC2)C1	Traditional Herbal Isolate=deacetylo-leandrin	-8.0
7093	O(C)[C@H]1[C@@H](O)[C@@H](C)O[C@H](O[C@@H]2C[C@H]3[C@@](C)([C@@H]4[C@@H]([C@]5(O)[C@](C)([C@@H]([C@@H](O)C5)C5=CC(=O)OC5)CC4)CC3)CC2)C1	Traditional Herbal Isolate=deacetylo-leandrin	-8.0
7278	C(=C\C=C\C=C(/C=C\C=C(\C=C\[C@]12C(C)(C)CCC[C@]1(C)O2)/C)\C)(\C=C/C=C(/C=C/[C@@H]1C(C)=CCCC1(C)C)\C)/C	Traditional Herbal Isolate=alpha-carotene-5 6-epoxide	-8.0
7500	O[C@@H]1CC(C)(C)C(/C=C/C(=C\C=C\C(=C/C=C/C=C(\C=C\C=C(/C=C/[C@]23C(C)(C)C[C@@H](O)C[C@]2(C)O3)\C)/C)\C)/C)=C(C)C1	Traditional Herbal Isolate=antheraxanthin	-8.0
7526	O[C@@H]1C=C(C)[C@@H](/C=C/C(=C/C=C\C(=C/C=C/C=C(\C=C/C=C(/C=C/[C@@]23C(C)(C)C[C@@H](O)C[C@]2(C)O3)\C)/C)\C)/C)C(C)(C)C1	Traditional Herbal Isolate=taraxanthin	-8.0
7559	O([C@H]1[C@H](O)[C@H](Oc2c(OC)c([O-])c3C(=O)C=C(c4ccccc4)Oc3c2)O[C@H](C)[C@H]1O)[C@H]1[C@@H](O)[C@H](O)[C@H](O)[C@@H](CO)O1	Traditional Herbal Isolate=7-methoxy-baicalein	-8.0
7621	Cc1[n+]2c3c(c(NCCCCCCCCCCNc4c5c([n+](c(C)c4)CCCCCCCCCC2)cccc5)c1)cccc3	NPC Approved Name=bisdequalinium diacetate	-8.0
7796	O=C(N[C@@]1(C(C)C)C(=O)N2[C@@H](Cc3ccccc3)C(=O)N3[C@H]([C@]2(O)O1)CCC3)[C@H]1C[N+@@H](C)[C@@H]2[C@H](c3c4c([nH]cc4C2)ccc3)C1	NPC Approved Name=dihydroergocristine mesylate	-8.0
8115	O(C[C@@H]1[C@H](O)[C@H](OC)[C@@H](O)[C@H](O[C@@H]2C[C@]3(O)[C@@](C)([C@H]4[C@H]([C@]5(O)[C@@](C)([C@H](C6=CC(=O)OC6)CC5)CC4)CC3)CC2)O1)[C@@H]1[C@@H](C)O[C@H](O)C[C@H]1O	Traditional Herbal Isolate=periplocin	-8.0
8523	O=C(Oc1cc(O)c2c(O[C@@H]([C@@H](O)C2)C=2C=3C(C(OC(=O)c4cc(O)c(O)c(O)c4)=C(O)C=2)=C([O-])C(=O)C=C([C@H]2[C@@H](O)Cc4c(O)cc(O)cc4O2)C=3)c1)c1cc(O)c(O)c(O)c1	Traditional Herbal Isolate=teaflavin a	-8.0
8652	O=C([O-])C[C@@]12[C@H](c3c(O)c(O)c(O)cc3C(=O)O[C@@H]3[C@H](OC(=O)c4cc(O)c(O)c(O)c4)O[C@H]4[C@H](O)[C@H]3OC(=O)c3c(c(O)c(O)c(O)c3)-c3c(O)c(O)c(O)cc3C(=O)OC4)[C@@H](C(=O)O1)OC2=O	Traditional Herbal Isolate=mallotinin	-8.0
6448	O[C@@H]1C(C)(C)[C@H]2[C@](C)([C@@H]3[C@@](C)(C45[C@@H]([C@@H]6[C@@](O)(C)C[C@@H](/C=C(\C)/C)OC6(OC4)C5)CC3)CC2)CC1	Traditional Herbal Isolate=jujubogenin	-7.9
6630	O=C1C(C)=C(C)C[C@@H]([C@@]2(C)O[C@H](O)C34O[C@@](O)([C@H]5[C@H]([C@@]6(C)C(=O)CC=CC6=CC5)CC3)CCC24)O1	Traditional Herbal Isolate=withaphysalin	-7.9
6636	O=C1C(C)=C(C)C[C@H]([C@]2(C)O[C@@H](O)C34O[C@](O)([C@H]5[C@H]([C@@]6(C)C(=O)CC=CC6=CC5)CC3)CCC24)O1	Traditional Herbal Isolate=withaphysalin	-7.9
6978	O([C@@H]1[C@@H](O)[C@@H](O)[C@@H](O)[C@@H](C)O1)[C@@H]1C[C@H]2[C@@](C)([C@@H]3[C@@H]([C@]4(O)[C@](C)([C@H](C5=CC(=O)OC5)CC4)CC3)CC2)CC1	Traditional Herbal Isolate=evomonoside	-7.9
7009	O=C1C2(O)C34[C@@](C)(O1)[C@H]1OC(=O)[C@@H]5[C@@](C)([C@@H]3C(=O)C(O4)(OC5)[C@H]3[C@@H]([C@]4(C)C(=O)C=CCC54OC5C3)CC2)C1	Traditional Herbal Isolate=physalin b	-7.9
7282	C(=C\C=C\C=C(/C=C\C=C(\C=C\[C@]12C(C)(C)CCC[C@@]1(C)O2)/C)\C)(\C=C/C=C(/C=C/[C@@H]1C(C)=CCCC1(C)C)\C)/C	Traditional Herbal Isolate=alpha-carotene-5 6-epoxide	-7.9
7481	O=C(N[C@@]1(C)C(=O)N2[C@@H](Cc3ccccc3)C(=O)N3[C@H]([C@@]2(O)O1)CCC3)[C@@H]1C=C2[C@@H]([N+@H](C)C1)Cc1c3c([nH]c1)cccc23	Indian Approved Name=belladona tinc;ergotamine tart;belladona FDA Approved Drug=ERGOTAMINE TARTRATE	-7.9
7498	O=C(N[C@@]1(C)C(=O)N2[C@@H](Cc3ccccc3)C(=O)N3[C@H]([C@@]2(O)O1)CCC3)[C@H]1C[N+@@H](C)[C@@H]2[C@H](c3c4c([nH]cc4C2)ccc3)C1	Traditional Herbal Isolate=daechu alkaloids Indian Approved Name=dihydroergotamine mesylate FDA Approved Drug=DIHYDROERGOTAMINE MESYLATE	-7.9
7515	O[C@@H]1C=C(C)[C@@H](/C=C/C(=C\C=C\C(=C/C=C/C=C(\C=C\C=C(\C)/[C@@H]2O[C@@]3(C)C(C(C)(C)C[C@H](O)C3)=C2)/C)\C)/C)C(C)(C)C1	Traditional Herbal Isolate=chrysanthemaxanthin	-7.9
7516	O[C@H]1C=C(C)[C@H](/C=C/C(=C\C=C\C(=C/C=C/C=C(\C=C\C=C(\C)/[C@@H]2O[C@@]3(C)C(C(C)(C)C[C@H](O)C3)=C2)/C)\C)/C)C(C)(C)C1	Traditional Herbal Isolate=chrysanthemaxanthin	-7.9
7529	O[C@H]1C=C(C)[C@@H](/C=C/C(=C/C=C\C(=C/C=C/C=C(\C=C/C=C(/C=C/[C@]23C(C)(C)C[C@H](O)C[C@]2(C)O3)\C)/C)\C)/C)C(C)(C)C1	Traditional Herbal Isolate=taraxanthin	-7.9
7687	Clc1c(OC)cc2cc1N(C)C(=O)C[C@H](OC(=O)C)[C@@]1(C)O[C@@H]1[C@@H](C)C1OC(=O)NC(O)([C@H](OC)/C=C/C=C(/C)\C2)C1	Traditional Herbal Isolate=maytanacine	-7.9
7849	O=C([O-])[C@H]1[C@H](O)[C@H](O)[C@H](O)[C@H](Oc2cc([O-])c3C(=O)C=C(c4ccc(O[C@H]5[C@H](O)[C@@H](O)[C@@H](O)[C@@H](C(=O)[O-])O5)cc4)Oc3c2)O1	Traditional Herbal Isolate=apigenin-7-diglucuronide	-7.9
7855	O=C([O-])[C@H]1[C@H](O)[C@@H](O)[C@H](O)[C@H](Oc2cc([O-])c3C(=O)C=C(c4ccc(O[C@H]5[C@@H](O)[C@H](O)[C@@H](O)[C@H](C(=O)[O-])O5)cc4)Oc3c2)O1	Traditional Herbal Isolate=apigenin-7-diglucuronide	-7.9
7919	O([C@H]1[C@H](C)O[C@H](O[C@@H]2C[C@H]3[C@@](C)([C@@H]4[C@H]([C@]5(O)[C@](C)([C@H](C6=CC(=O)OC6)CC5)CC4)CC3)CC2)C[C@H]1O)[C@@H]1O[C@@H](C)[C@H](O)[C@H](O)C1	Traditional Herbal Isolate=8-beta-hydroxy-digitoxigenin	-7.9
8114	O(C[C@@H]1[C@H](O)[C@@H](OC)[C@H](O)[C@H](O[C@@H]2C[C@]3(O)[C@@](C)([C@@H]4[C@H]([C@]5(O)[C@@](C)([C@H](C6=CC(=O)OC6)CC5)CC4)CC3)CC2)O1)[C@@H]1[C@H](C)O[C@H](O)C[C@@H]1O	Traditional Herbal Isolate=periplocin	-7.9
8397	O=C(O[C@H]1[C@@H](O)[C@H](C)O[C@@H](O[C@@H]2[C@H](C)O[C@H](O[C@H]3[C@H](C)O[C@H](O[C@@H]4C[C@H]5[C@@](C)([C@H]6[C@H]([C@]7(O)[C@](C)([C@H](C8=CC(=O)OC8)CC7)CC6)CC5)CC4)C[C@H]3O)C[C@H]2O)C1)C	FDA Approved Drug=ACETYLDIGITOXIN	-7.9
3846	O=C1O[C@@H](c2cocc2)C[C@@]2(C)[C@@H]1CC(=O)[C@@H]1[C@H]3C(=O)OC(C3)C[C@@H]21	Traditional Herbal Isolate=diosbulbin	-7.8
4925	O=C1N(C)CC(=O)N2[C@@H](c3cc4OCOc4cc3)c3[nH]c4c(c3C[C@H]12)cccc4	Indian Approved Name=tadalafil FDA Approved Drug=TADALAFIL	-7.8
5258	O=C1c2c3c4c5c6c(nc4cc2)-c2c(C(=O)c6ccc5nc3-c3c1cccc3)cccc2	Traditional Herbal Isolate=indo-yellow	-7.8
5833	O[C@@]12O[C@H]3[C@H]([C@@H](C)[C@@H]1[N+H2]C[C@H](C)C2)[C@@]1(C)[C@@H]([C@@H]2[C@@H]([C@@]4(C)[C@@H](C[C@@H]([N+H3])CC4)CC2)CC1)C3	Traditional Herbal Isolate=solanocapsin;solanocapsine	-7.8
6631	O=C1C(C)=C(C)C[C@@H]([C@@]2(C)O[C@@H](O)C34O[C@@](O)([C@H]5[C@@H]([C@]6(C)C(=O)CC=CC6=CC5)CC3)CCC24)O1	Traditional Herbal Isolate=withaphysalin	-7.8
6719	Clc1c(C2=N[C@@H](C)c3n(c(C)nn3)-c3sc(CCc4ccc(CC(C)C)cc4)cc23)cccc1	NPC Approved Name=israpafant	-7.8
6844	Fc1c(-c2ccc(-c3ccc(C4=C(F)N[C@@H]([C@@H]5N[C@@H]6[C@H](C5)C6)[N+H2]4)cc3)cc2)nc([C@H]2[N+H2][C@@H](C)[C@H](C)C2)[nH]1	Indian Approved Name=5-hydroxytrytophan	-7.8
6845	Fc1c(-c2ccc(-c3ccc(C4=C(F)N[C@@H]([C@@H]5N[C@@H]6[C@H](C5)C6)[N+H2]4)cc3)cc2)nc([C@H]2[N+H2][C@H](C)[C@H](C)C2)[nH]1	Indian Approved Name=5-hydroxytrytophan	-7.8
6871	O=C1C2(O)C34[C@@](C)(O1)[C@@H]1OC(=O)C(=C)[C@@](C)([C@@H]3C(=O)[C@](O)(O4)[C@H]3[C@@H]([C@@]4(C)C(=O)C=CCC4=CC3)CC2)C1	Traditional Herbal Isolate=physalin c	-7.8
6983	O([C@@H]1[C@H](O)[C@@H](O)[C@@H](O)[C@@H](C)O1)[C@@H]1C[C@H]2[C@@](C)([C@H]3[C@@H]([C@]4(O)[C@](C)([C@H](C5=CC(=O)OC5)CC4)CC3)CC2)CC1	Traditional Herbal Isolate=evomonoside	-7.8
7008	O=C1C2(O)C34[C@](C)(O1)[C@H]1OC(=O)[C@@H]5[C@](C)([C@@H]3C(=O)C(O4)(OC5)[C@H]3[C@@H]([C@]4(C)C(=O)C=CCC54OC5C3)CC2)C1	Traditional Herbal Isolate=physalin b	-7.8
7010	O=C1C2(O)C34[C@@](C)(O1)[C@@H]1OC(=O)[C@@H]5[C@](C)([C@H]3C(=O)C(O4)(OC5)[C@@H]3[C@@H]([C@@]4(C)C(=O)C=CCC54OC5C3)CC2)C1	Traditional Herbal Isolate=physalin b	-7.8
7117	O([C@H]1[C@H](O)[C@H](O)[C@@H](O)[C@@H](C)O1)[C@@H]1C[C@]2(O)[C@@](C)([C@H]3[C@H]([C@]4(O)[C@@](C)([C@H](C5=CC(=O)OC5)CC4)CC3)CC2)CC1	Traditional Herbal Isolate=peripalloside	-7.8
7120	O([C@H]1[C@@H](O)[C@H](O)[C@@H](O)[C@@H](C)O1)[C@@H]1C[C@]2(O)[C@@](C)([C@H]3[C@H]([C@]4(O)[C@@](C)([C@H](C5=CC(=O)OC5)CC4)CC3)CC2)CC1	Traditional Herbal Isolate=peripalloside	-7.8
7386	O[C@H]1C2Oc3c(O)c(-c4c(O)c5OC6[C@@H](O)C=C[C@H]7[C@@H]8[N+@H](C)CCC67c5c(c4)C8)cc4c3C32[C@H]([C@@H]([N+@@H](C)CC3)C4)C=C1	Traditional Herbal Isolate=pseudomorphine	-7.8
7465	O=C(N[C@@]1(C(C)C)C(=O)N2[C@@H](CC(C)C)C(=O)N3[C@H]([C@@]2(O)O1)CCC3)[C@@H]1C[N+@H](C)[C@@H]2[C@@H](c3c4c([nH]cc4C2)ccc3)C1	NPC Approved Name=dihydro-alpha-ergocryptine	-7.8
7504	O[C@@H]1C=C(C)[C@@H](/C=C/C(=C\C=C\C(=C/C=C/C=C(\C=C\C=C(\C)/[C@H]2O[C@]3(C)C(C(C)(C)C[C@H](O)C3)=C2)/C)\C)/C)C(C)(C)C1	Traditional Herbal Isolate=chrysanthemaxanthin	-7.8
7511	O[C@H]1C=C(C)[C@@H](/C=C/C(=C\C=C\C(=C/C=C/C=C(\C=C\C=C(\C)/[C@@H]2O[C@@]3(C)C(C(C)(C)C[C@@H](O)C3)=C2)/C)\C)/C)C(C)(C)C1	Traditional Herbal Isolate=chrysanthemaxanthin	-7.8
7837	O=C(O[C@H]1C(C)(C)[C@H]2[C@](C)([C@@H]3[C@](C)([C@]4(C)C([C@H]5[C@@H](C)[C@@H](CO)CC[C@]5(C(=O)[O-])CC4)=CC3)CC2)CC1)/C=C/c1ccc(O)cc1	Traditional Herbal Isolate=rubicoumaric acid	-7.8
7918	O([C@H]1[C@H](C)O[C@H](O[C@@H]2C[C@H]3[C@@](C)([C@H]4[C@@H]([C@]5(O)[C@](C)([C@H](C6=CC(=O)OC6)CC5)CC4)CC3)CC2)C[C@H]1O)[C@@H]1O[C@@H](C)[C@H](O)[C@H](O)C1	Traditional Herbal Isolate=8-beta-hydroxy-digitoxigenin	-7.8
8076	Oc1cc(C2=[cH0]3[nH][cH0](=C(c4cc(O)ccc4)C4=NC(=C(c5cc(O)ccc5)c5[nH]c(C(c6cc(O)ccc6)=C6N=C2C=C6)cc5)CC4)cc3)ccc1	NPC Approved Name=temoporfin	-7.8
8088	O=[N+]([O-])c1cc([C@@H]2[C@@H](C(=O)OC)[C@](C)(c3ccc(N4CC[N+H](C(c5ccccc5)c5ccccc5)CC4)cc3)[N+H2]C(C)=C2C(=O)OC=C)ccc1	NPC Approved Name=ae0047	-7.8
8149	O=C[C@]12[C@@](O)(C[C@@H](O[C@H]3[C@H](O)[C@H](O)[C@H](O[C@H]4[C@@H](O)[C@H](O)[C@H](O)[C@H](CO)O4)[C@@H](C)O3)CC1)CC[C@H]1[C@]3(O)[C@@](C)([C@H](C4=CC(=O)OC4)CC3)CC[C@H]21	Traditional Herbal Isolate=bogoroside;convalloside	-7.8
8168	FC(F)(F)C(=O)N[C@H]1[C@H](O)[C@H](C)O[C@@H](O[C@@H]2c3c([O-])c4C(=O)c5c(OC)cccc5C(=O)c4c([O-])c3C[C@@](O)(C(=O)COC(=O)CCCC)C2)C1	FDA Approved Drug=VALRUBICIN	-7.8
8334	O([C@H]1[C@H](C)O[C@H](O[C@@H]2C[C@H]3[C@@](C)([C@H]4[C@H]([C@]5(O)[C@](C)([C@H](O)C4)[C@H](C4=CC(=O)OC4)CC5)CC3)CC2)C[C@H]1O)[C@H]1O[C@@H](C)[C@H](O[C@@H]2O[C@@H](C)[C@H](O)[C@H](O)C2)[C@H](O)C1	China Approved Name=digoxin WHO Essential Medicine=digoxin Indian Approved Name=digoxin FDA Approved Drug=DIGOXIN	-7.8
8370	O(C)[C@H]1[C@H](C)O[C@@H](O[C@H]2[C@H](C)O[C@H](O[C@H]3[C@H](C)O[C@H](O[C@@H]4C[C@H]5[C@@](C)([C@H]6[C@H]([C@]7(O)[C@](C)([C@H](O)C6)[C@H](C6=CC(=O)OC6)CC7)CC5)CC4)C[C@H]3O)C[C@H]2O)C[C@H]1O	NPC Approved Name=metildigoxin	-7.8
8394	O=C(O[C@H]1[C@@H](O)[C@H](C)O[C@@H](O[C@H]2[C@H](C)O[C@H](O[C@H]3[C@H](C)O[C@H](O[C@H]4C[C@H]5[C@@](C)([C@H]6[C@H]([C@]7(O)[C@](C)([C@H](C8=CC(=O)OC8)CC7)CC6)CC5)CC4)C[C@H]3O)C[C@H]2O)C1)C	FDA Approved Drug=ACETYLDIGITOXIN	-7.8
8548	O([C@H]1[C@H](O[C@H]2[C@@H](O)[C@@H](O)[C@@H](O)[C@@H](C)O2)[C@H](O[C@H]2CC=3[C@@](C)([C@@H]4[C@@H]([C@@H]5[C@](C)([C@H]6[C@@H](C)[C@]7(O[C@H]6C5)[N+H2]C[C@@H](C)CC7)CC4)CC=3)CC2)O[C@@H](CO)[C@@H]1O)[C@H]1[C@@H](O)[C@H](O)[C@H](O)[C@H](CO)O1	Traditional Herbal Isolate=solasonine	-7.8
8555	O=C([O-])[C@]12[C@H](C=3[C@@](C)([C@@]4(C)[C@@H]([C@]5(C)[C@@H](C(C)(C)[C@H](O[C@@H]6[C@@H](O[C@@H]7[C@H](O[C@@H]8[C@@H](O)[C@@H](O)[C@H](O)[C@H](C)O8)[C@H](O)[C@@H](O)[C@@H](CO)O7)[C@@H](O)[C@H](O)CO6)CC5)CC4)CC=3)CC1)CC(C)(C)CC2	Traditional Herbal Isolate=raddeanin a	-7.8
8775	O=C(NCC(=O)N)[C@@H](NC(=O)[C@@H]1N(C(=O)[C@@H]2NC(=O)[C@H](CC(=O)N)NC(=O)[C@H](CCC(=O)N)NC(=O)[C@@H](Cc3ccccc3)NC(=O)[C@H](Cc3ccc(O)cc3)NC(=O)CCSSC2)CCC1)CCCNC(=[N+H2])N	FDA Approved Drug=DESMOPRESSIN ACETATE	-7.8
8889	O(C[C@H](CC[C@@]1(O)[C@@H](C)[C@@H]2[C@@]3(C)[C@@H]([C@H]4[C@H]([C@]5(C)C(=CC4)C[C@@H](O[C@@H]4[C@@H](O[C@H]6[C@@H](O)[C@@H](O)[C@@H](O)[C@@H](C)O6)[C@@H](O)[C@@H](O[C@@H]6[C@@H](O)[C@H](O)[C@H](O[C@H]7[C@H](O)[C@H](O)[C@H](O)[C@@H](C)O7)[C@@H](C)O6)[C@H](CO)O4)CC5)CC3)C[C@@H]2O1)C)[C@H]1[C@@H](O)[C@H](O)[C@H](O)[C@H](CO)O1	Traditional Herbal Isolate=asperoside;proto-isoerubosides	-7.8
8939	O=C(N[C@@H]1[C@H](C)OC(=O)[C@@H](C(C)C)N(C)C(=O)CN(C)C(=O)[C@@H]2N(C(=O)[C@@H](C(C)C)NC1=O)CCC2)c1c2N=C3C(C(=O)N[C@H]4[C@@H](C)OC(=O)[C@@H](C(C)C)N(C)C(=O)CN(C)C(=O)[C@@H]5N(C(=O)[C@@H](C(C)C)NC4=O)CCC5)=C(N)C(=O)C(C)=C3Oc2c(C)cc1	China Approved Name=actinomycin WHO Essential Medicine=dactinomycin Indian Approved Name=dactinomycin FDA Approved Drug=DACTINOMYCIN	-7.8
5938	O=C1C(C)(C)[C@H]2[C@](C)([C@@H]3C([C@@]4(C)[C@](C)([C@H]([C@H](CC/C=C(\C)/C)C)[C@@H](O)C4)CC3)=CC2)CC1	Traditional Herbal Isolate=kulinone	-7.7
6447	O[C@@H]1C(C)(C)[C@H]2[C@](C)([C@@H]3[C@@](C)(C45[C@@H]([C@@H]6[C@](O)(C)C[C@H](/C=C(\C)/C)OC6(OC4)C5)CC3)CC2)CC1	Traditional Herbal Isolate=jujubogenin	-7.7
6622	O=C1C(C)=C(C)C[C@H]([C@]2(C)O[C@H](O)C34O[C@](O)([C@@H]5[C@@H]([C@]6(C)C(=O)CC=CC6=CC5)CC3)CCC24)O1	Traditional Herbal Isolate=withaphysalin	-7.7
6745	O[C@H](C(O)(C)C)[C@H]1O[C@H](O)[C@@H]([C@H]2[C@]3(C)[C@](C)(C=4[C@@H]([C@]5(C)[C@H](C(C)(C)[C@@H](O)CC5)CC=4)CC3)CC2)C1	Traditional Herbal Isolate=melianotriol	-7.7
6793	O=C(Nc1ccc(C(=O)N2c3c(-c4nc(C)[nH]c4CC2)cccc3)cc1)c1c(-c2ccccc2)cccc1	FDA Approved Drug=CONIVAPTAN HYDROCHLORIDE	-7.7
6938	O=C(N[C@H]1C(=O)N2[C@H](C(=O)[O-])C(C)(C)S[C@H]12)[C@H](NC(=O)N1C(=O)C(=O)N(CC)CC1)c1ccccc1	China Approved Name=Piperacillin Indian Approved Name=piperacillin Australia Approved Name=PIPERACILLIN FDA Approved Drug=PIPERACILLIN SODIUM	-7.7
7020	O=C(NC[N+H]1CCCC1)C=1C(=O)[C@]2(O)C([O-])=C3C(=O)c4c([O-])cccc4[C@](O)(C)[C@H]3C[C@H]2[C@@H]([N+H](C)C)C=1[O-]	NPC Approved Name=rolitetracycline	-7.7
7055	O(C[C@H]1[C@@H](O)[C@@H](O)[C@H](O)[C@H](Oc2c([O-])c3C(=O)c4c(C(=O)c3cc2)cccc4)O1)[C@H]1[C@@H](O)[C@H](O)[C@@H](O)CO1	Traditional Herbal Isolate=oxymethyl anthraquinone	-7.7
7091	O(C)[C@@H]1[C@@H](O)[C@@H](C)O[C@H](O[C@@H]2C[C@H]3[C@@](C)([C@@H]4[C@@H]([C@]5(O)[C@](C)([C@@H]([C@@H](O)C5)C5=CC(=O)OC5)CC4)CC3)CC2)C1	Traditional Herbal Isolate=deacetylo-leandrin	-7.7
7201	O(C)[C@H]1[C@H](O)[C@H](C)O[C@@H](O[C@@H]2C[C@H]3[C@](C)([C@@H]4[C@@H](O)C(=O)[C@]5(C)[C@H](C6=CC(=O)OC6)CC[C@]5(O)[C@@H]4CC3)CC2)C1	Traditional Herbal Isolate=sinostroside	-7.7
7505	O[C@H]1C=C(C)[C@H](/C=C/C(=C\C=C\C(=C/C=C/C=C(\C=C\C=C(\C)/[C@H]2O[C@]3(C)C(C(C)(C)C[C@H](O)C3)=C2)/C)\C)/C)C(C)(C)C1	Traditional Herbal Isolate=chrysanthemaxanthin	-7.7
7506	O[C@H]1C=C(C)[C@H](/C=C/C(=C\C=C\C(=C/C=C/C=C(\C=C\C=C(\C)/[C@@H]2O[C@]3(C)C(C(C)(C)C[C@H](O)C3)=C2)/C)\C)/C)C(C)(C)C1	Traditional Herbal Isolate=chrysanthemaxanthin	-7.7
7510	O[C@@H]1C=C(C)[C@@H](/C=C/C(=C\C=C\C(=C/C=C/C=C(\C=C\C=C(\C)/[C@@H]2O[C@@]3(C)C(C(C)(C)C[C@@H](O)C3)=C2)/C)\C)/C)C(C)(C)C1	Traditional Herbal Isolate=chrysanthemaxanthin	-7.7
7517	O[C@@H]1C=C(C)[C@@H](/C=C/C(=C/C=C\C(=C/C=C/C=C(\C=C/C=C(/C=C/[C@]23C(C)(C)C[C@@H](O)C[C@@]2(C)O3)\C)/C)\C)/C)C(C)(C)C1	Traditional Herbal Isolate=taraxanthin	-7.7
7518	O[C@H]1C=C(C)[C@@H](/C=C/C(=C/C=C\C(=C/C=C/C=C(\C=C/C=C(/C=C/[C@@]23C(C)(C)C[C@@H](O)C[C@@]2(C)O3)\C)/C)\C)/C)C(C)(C)C1	Traditional Herbal Isolate=taraxanthin	-7.7
7547	O=C(Oc1cc2c(CC)c3c(nc2cc1)C=1N(C(=O)C2=C([C@@](O)(CC)C(=O)OC2)C=1)C3)N1CCC([N+H]2CCCCC2)CC1	Indian Approved Name=irinotecan hcl FDA Approved Drug=IRINOTECAN HYDROCHLORIDE	-7.7
7564	O([C@@H]1[C@H](O)[C@H](Oc2c(OC)c([O-])c3C(=O)C=C(c4ccccc4)Oc3c2)O[C@@H](C)[C@H]1O)[C@H]1[C@@H](O)[C@H](O)[C@H](O)[C@H](CO)O1	Traditional Herbal Isolate=7-methoxy-baicalein	-7.7
7566	O([C@H]1[C@H](O)[C@H](Oc2c(OC)c([O-])c3C(=O)C=C(c4ccccc4)Oc3c2)O[C@@H](C)[C@H]1O)[C@H]1[C@@H](O)[C@H](O)[C@H](O)[C@H](CO)O1	Traditional Herbal Isolate=7-methoxy-baicalein	-7.7
7568	O([C@@H]1[C@H](O)[C@H](Oc2c(OC)c([O-])c3C(=O)C=C(c4ccccc4)Oc3c2)O[C@@H](C)[C@H]1O)[C@H]1[C@H](O)[C@H](O)[C@H](O)[C@H](CO)O1	Traditional Herbal Isolate=7-methoxy-baicalein	-7.7
7594	O(C[C@H]1[C@H](O)[C@H](O)[C@@H](O)[C@H](OC2=C(c3ccc(O)cc3)Oc3c(c([O-])cc(O)c3)C2=O)O1)[C@H]1[C@H](O)[C@H](O)[C@H](O)[C@@H](C)O1	Traditional Herbal Isolate=nicotiflorin	-7.7
7628	O=C1[C@H](O)CC(C)(C)C(/C=C/C(=C\C=C\C(=C/C=C/C=C(\C=C\C=C(/C=C/C2=C(C)C(=O)[C@@H](O)CC2(C)C)\C)/C)\C)/C)=C1C	Indian Approved Name=astaxanthin complex	-7.7
7629	O=C1[C@H](O)CC(C)(C)C(/C=C/C(=C\C=C\C(=C/C=C/C=C(\C=C\C=C(/C=C/C2=C(C)C(=O)[C@@H](O)CC2(C)C)\C)/C)\C)/C)=C1C	Indian Approved Name=astaxanthin complex	-7.7
7666	O([C@@H](C)[C@@]1(O)[C@]2(C)[C@@H](OC(=O)c3ccccc3)C[C@@H]3[C@](O)([C@@H](O)C=C4[C@]3(C)CC[C@@H](O)C4)[C@@]2(O)CC1)C(=O)c1ccccc1	Traditional Herbal Isolate=dibenzoylgagaimol	-7.7
7677	Clc1c(OC)cc2cc1N(C)C(=O)C[C@@H](OC(=O)C)[C@@]1(C)O[C@H]1[C@H](C)C1OC(=O)NC(O)([C@@H](OC)/C=C/C=C(/C)\C2)C1	Traditional Herbal Isolate=maytanacine	-7.7
7757	O(C)c1c(O)c2Oc3ccc(cc3)C[C@@H]3[N+@H](C)CCc4c3cc(c(OC)c4)Oc3c(O)ccc(c3)C[C@@H]3[N+](C)(C)CCc(c23)c1	FDA Approved Drug=TUBOCURARINE CHLORIDE	-7.7
7795	O=C(N[C@@]1(C(C)C)C(=O)N2[C@@H](Cc3ccccc3)C(=O)N3[C@H]([C@@]2(O)O1)CCC3)[C@H]1C[N+@@H](C)[C@@H]2[C@H](c3c4c([nH]cc4C2)ccc3)C1	NPC Approved Name=dihydroergocristine mesylate	-7.7
7797	O=C(N[C@@]1(C(C)C)C(=O)N2[C@@H](Cc3ccccc3)C(=O)N3[C@H]([C@@]2(O)O1)CCC3)[C@H]1C[N+@@H](C)[C@@H]2[C@@H](c3c4c([nH]cc4C2)ccc3)C1	NPC Approved Name=dihydroergocristine mesylate	-7.7
7832	O=C(O[C@H]1C(C)(C)[C@@H]2[C@@](C)([C@H]3[C@](C)([C@]4(C)C([C@@H]5[C@@H](C)[C@@H](CO)CC[C@@]5(C(=O)[O-])CC4)=CC3)CC2)CC1)/C=C/c1ccc(O)cc1	Traditional Herbal Isolate=rubicoumaric acid	-7.7
7835	O=C(O[C@@H]1C(C)(C)[C@@H]2[C@@](C)([C@@H]3[C@](C)([C@@]4(C)C([C@@H]5[C@H](C)[C@H](CO)CC[C@]5(C(=O)[O-])CC4)=CC3)CC2)CC1)/C=C/c1ccc(O)cc1	Traditional Herbal Isolate=rubicoumaric acid	-7.7
8074	S(=O)(=O)([O-])c1c2c(c(N)c(N=Nc3c(C)cc(-c4cc(C)c(N=Nc5c(N)c6c(c(S(=O)(=O)[O-])c5)cccc6)cc4)cc3)c1)cccc2	Traditional Herbal Isolate=purpurine	-7.7
8104	O(C[C@@H]1[C@H](O)[C@@H](OC)[C@@H](O)[C@H](O[C@@H]2C[C@]3(O)[C@@](C)([C@@H]4[C@@H]([C@]5(O)[C@@](C)([C@H](C6=CC(=O)OC6)CC5)CC4)CC3)CC2)O1)[C@@H]1[C@@H](C)O[C@H](O)C[C@H]1O	Traditional Herbal Isolate=periplocin	-7.7
8107	O(C[C@@H]1[C@H](O)[C@@H](OC)[C@H](O)[C@H](O[C@@H]2C[C@]3(O)[C@@](C)([C@@H]4[C@@H]([C@]5(O)[C@@](C)([C@H](C6=CC(=O)OC6)CC5)CC4)CC3)CC2)O1)[C@@H]1[C@H](C)O[C@H](O)C[C@@H]1O	Traditional Herbal Isolate=periplocin	-7.7
8199	O=C[C@@]12[C@](O)(C[C@H](O[C@H]3[C@H](O)[C@H](O)[C@@H](O[C@H]4[C@@H](O)[C@@H](O)[C@H](O)[C@@H](CO)O4)[C@@H](C)O3)CC1)CC[C@H]1[C@]3(O)[C@@](C)([C@@H](C4=COC(=O)C=C4)CC3)CC[C@@H]21	Traditional Herbal Isolate=hellebrin	-7.7
8219	Clc1c(OC)cc2cc1N(C)C(=O)C[C@H](OC(=O)[C@@H](N(C(=O)CC(C)C)C)C)[C@@]1(C)O[C@H]1[C@H](C)C1OC(=O)NC(O)([C@@H](OC)/C=C/C=C(/C)\C2)C1	Traditional Herbal Isolate=maytanvaline	-7.7
8226	Clc1c(OC)cc2cc1N(C)C(=O)C[C@H](OC(=O)[C@H](N(C(=O)CC(C)C)C)C)[C@@]1(C)O[C@H]1[C@H](C)C1OC(=O)NC(O)([C@@H](OC)/C=C/C=C(/C)\C2)C1	Traditional Herbal Isolate=maytanvaline	-7.7
8333	O([C@H]1[C@H](C)O[C@H](O[C@@H]2C[C@H]3[C@@](C)([C@H]4[C@H]([C@]5(O)[C@](C)([C@@H]([C@@H](O)C5)C5=CC(=O)OC5)CC4)CC3)CC2)C[C@H]1O)[C@H]1O[C@@H](C)[C@H](O[C@@H]2O[C@@H](C)[C@H](O)[C@H](O)C2)[C@H](O)C1	Traditional Herbal Isolate=gitoxin	-7.7
8516	O=C([O-])c1cc([O-])c2C(=O)c3c(O[C@H]4[C@@H](O)[C@H](O)[C@H](O)[C@H](CO)O4)cccc3[C@@H]([C@H]3c4c(c([O-])cc(C(=O)[O-])c4)C(=O)c4c(O[C@H]5[C@@H](O)[C@H](O)[C@H](O)[C@H](CO)O5)cccc34)c2c1	WHO Essential Medicine=senna	-7.7
8593	O=C([O-])[C@@H]1[C@H](O)C[C@]2(O)O[C@H]1C[C@@H](O[C@H]1[C@H](O)[C@H]([N+H3])[C@H](O)[C@H](C)O1)/C=C/C=C/C=C/C=C/C=C/C=C/C=C/[C@H](C)[C@@H](O)[C@H](C)[C@H](C)OC(=O)C[C@@H](O)C[C@H](O)CC[C@H](O)[C@H](O)C[C@@H](O)C2	WHO Essential Medicine=amphotericin B Indian Approved Name=amphotericin-b FDA Approved Drug=AMPHOTERICIN B	-7.7
8696	O=C(NCC(=O)N)[C@H](NC(=O)[C@H]1N(C(=O)[C@@H]2NC(=O)[C@H](CC(=O)N)NC(=O)[C@H]([C@@H](O)C)NC(=O)[C@H]([C@@H](CC)C)NC(=O)[C@H](Cc3ccc(O)cc3)NC(=O)[C@@H]([N+H3])CSSC2)CCC1)CC(C)C	Indian Approved Name=urofollitrophin FDA Approved Drug=UROFOLLITROPIN	-7.7
8813	O=C([O-])[C@@H]1[C@H](O)CC2(O)OC1C[C@H](O[C@H]1[C@@H](O)[C@@H]([N+H3])[C@@H](O)[C@H](C)O1)C=CC=CC=CC=CC=CC=CC=C[C@@H](C)[C@@H]([C@H](C[C@H]([C@@H](O)CC(=O)c1ccc(N)cc1)C)C)OC(=O)CC(=O)CCCC(=O)C[C@@H](O)C[C@@H](O)C[C@H](O)C2	FDA Approved Drug=CANDICIDIN	-7.7
8878	O([C@@H](C)c1c(C)[cH0]=2[nH][cH0]1=Cc1c(C)c([C@H](O)C)c([nH]1)C=C1C(C)=C(CCC(=O)[O-])C(=N1)C=C1C(CCC(=O)[O-])=C(C)C(=N1)C=2)[C@H](C)c1c(C)[cH0]=2[nH][cH0]1=CC=1C(C)=C(CCC(=O)[O-])C(N=1)=CC=1C(CCC(=O)[O-])=C(C)C(N=1)=Cc1c(C)c([C@@H](O)C)c([nH]1)C=2	FDA Approved Drug=PORFIMER SODIUM	-7.7
8886	O(C[C@H](CC[C@@]1(O)[C@@H](C)[C@@H]2[C@]3(C)[C@H]([C@@H]4[C@@H]([C@@]5(C)C(=CC4)C[C@@H](O[C@@H]4[C@@H](O[C@H]6[C@@H](O)[C@@H](O)[C@@H](O)[C@@H](C)O6)[C@@H](O)[C@@H](O[C@@H]6[C@@H](O)[C@H](O)[C@H](O[C@H]7[C@H](O)[C@H](O)[C@H](O)[C@@H](C)O7)[C@@H](C)O6)[C@H](CO)O4)CC5)CC3)C[C@@H]2O1)C)[C@H]1[C@@H](O)[C@H](O)[C@H](O)[C@H](CO)O1	Traditional Herbal Isolate=asperoside;proto-isoerubosides	-7.7
8936	O=C(N[C@H]1[C@@H](C)OC(=O)[C@H](C(C)C)N(C)C(=O)CN(C)C(=O)[C@H]2N(C(=O)[C@H](C(C)C)NC1=O)CCC2)c1c2N=C3C(C(=O)N[C@@H]4[C@H](C)OC(=O)[C@H](C(C)C)N(C)C(=O)CN(C)C(=O)[C@H]5N(C(=O)[C@@H](C(C)C)NC4=O)CCC5)=C(N)C(=O)C(C)=C3Oc2c(C)cc1	China Approved Name=actinomycin WHO Essential Medicine=dactinomycin Indian Approved Name=dactinomycin FDA Approved Drug=DACTINOMYCIN	-7.7
5354	O=C1c2c(-c3c4C(=O)c5c(C(=O)c4ccc3)cccc5)cccc2C(=O)c2c1cccc2	Traditional Herbal Isolate=bianthraquinonyl	-7.6
5930	O=C1[C@H](C)[C@]2(C)[C@H]([C@]3(C)[C@H](C(=O)C2)[C@]2(C)[C@](C)([C@H]4[C@](C)(CC2)CCC(C)(C)C4)CC3)CC1	Traditional Herbal Isolate=putranjivadione	-7.6
6215	Clc1c(C2=NCc3n(c(C)nn3)[C@H]3SC(CCC(=O)N4CCOCC4)=C[C@H]23)cccc1	NPC Approved Name=apafant	-7.6
6633	O=C1C(C)=C(C)C[C@H]([C@]2(C)O[C@@H](O)C34O[C@](O)([C@H]5[C@H]([C@]6(C)C(=O)CC=CC6=CC5)CC3)CCC24)O1	Traditional Herbal Isolate=withaphysalin	-7.6
6689	O=C(OCC(=O)[C@@]1(O)[C@]2(C)[C@H]([C@@H]3[C@H]([C@H](O)C2)[C@]2(C)C(=CC(=O)CC2)CC3)CC1)CCC1CCCC1	FDA Approved Drug=HYDROCORTISONE CYPIONATE	-7.6
6913	O=C([O-])c1c(-c2ccc(Cn3c(CCC)nc4c(C)cc(-c5n(C)c6c(n5)cccc6)cc34)cc2)cccc1	China Approved Name=telmisartan Indian Approved Name=telmisartan FDA Approved Drug=TELMISARTAN	-7.6
6936	O=C(C)c1c(O)c(Cc2c(O)c3c(OC(C)(C)C=C3)c3C(=O)C[C@H](c4ccccc4)Oc23)c(O)c(C)c1O	Traditional Herbal Isolate=isorottlerin	-7.6
6937	O=C(C)c1c(O)c(Cc2c(O)c3c(OC(C)(C)C=C3)c3C(=O)C[C@@H](c4ccccc4)Oc23)c(O)c(C)c1O	Traditional Herbal Isolate=isorottlerin	-7.6
7004	Clc1c(C(F)(F)F)cc(C2(O)CC[N+H](CCCC(c3ccc(F)cc3)c3ccc(F)cc3)CC2)cc1	China Approved Name=Penfluridol Indian Approved Name=penfluridol	-7.6
7014	O=C1C2(O)C34[C@@](C)(O1)[C@H]1OC(=O)[C@@H]5[C@](C)([C@@H]3C(=O)C(O4)(OC5)[C@H]3[C@H]([C@@]4(C)C(=O)C=CCC54OC5C3)CC2)C1	Traditional Herbal Isolate=physalin b	-7.6
7094	FC(F)(F)c1cc([C@@H](O[C@@H]2[C@@H]([N+@@H](CC3=NNC(=O)N3)CCO2)c2ccc(F)cc2)C)cc(C(F)(F)F)c1	Indian Approved Name=aprepitant FDA Approved Drug=APREPITANT	-7.6
7123	C(=C\C=C\C=C(/C=C/C=C(\C=C\C=1C(C)(C)CCCC=1C)/C)\C)(\C=C\C=C(/C=C/[C@H]1C(C)=CCCC1(C)C)\C)/C	NPC Approved Name=alpha-carotene (6'r)-isomer	-7.6
7169	O(C)[C@H]1[C@H](O)[C@H](C)O[C@@H](O[C@@H]2C[C@H]3[C@@](C)([C@@H]4C(=O)[C@H](O)[C@@]5(C)[C@H](C6=CC(=O)OC6)CC[C@]5(O)[C@@H]4CC3)CC2)C1	Traditional Herbal Isolate=caudoside;sarmutoside	-7.6
7240	O(C)c1ccc(C=2Oc3c(c(O)cc([O-])c3C(=O)C=2)-c2c(O)ccc([C@@H]3Oc4c(c([O-])cc(O)c4)C(=O)C3)c2)cc1	Traditional Herbal Isolate=methyl amentoflavone	-7.6
7314	Fc1c(N2c3nc(N4C[C@H]5C(NC(=O)[C@H](NC(=O)[C@H]([N+H3])C)C)[C@H]5C4)c(F)cc3C(=O)C(C(=O)[O-])=C2)ccc(F)c1	FDA Approved Drug=ALATROFLOXACIN MESYLATE	-7.6
7389	O[C@H]1C2Oc3c(O)c(-c4c(O)c5OC6[C@@H](O)C=C[C@H]7[C@@H]8[N+@@H](C)CCC67c5c(c4)C8)cc4c3C32[C@@H]([C@@H]([N+@@H](C)CC3)C4)C=C1	Traditional Herbal Isolate=pseudomorphine	-7.6
7392	O[C@@H]1C2Oc3c(O)c(-c4c(O)c5OC6[C@@H](O)C=C[C@H]7[C@H]8[N+@@H](C)CCC67c5c(c4)C8)cc4c3C32[C@@H]([C@H]([N+@H](C)CC3)C4)C=C1	Traditional Herbal Isolate=pseudomorphine	-7.6
7426	S(=O)([O-])(=NC(=O)c1cc(OC)c(Cc2c3c(n(C)c2)ccc(NC(=O)OC2CCCC2)c3)cc1)c1c(C)cccc1	FDA Approved Drug=ZAFIRLUKAST	-7.6
7520	O[C@@H]1C=C(C)[C@@H](/C=C/C(=C/C=C\C(=C/C=C/C=C(\C=C/C=C(/C=C/[C@]23C(C)(C)C[C@H](O)C[C@@]2(C)O3)\C)/C)\C)/C)C(C)(C)C1	Traditional Herbal Isolate=taraxanthin	-7.6
7523	O[C@H]1C=C(C)[C@@H](/C=C/C(=C/C=C\C(=C/C=C/C=C(\C=C/C=C(/C=C/[C@]23C(C)(C)C[C@@H](O)C[C@]2(C)O3)\C)/C)\C)/C)C(C)(C)C1	Traditional Herbal Isolate=taraxanthin	-7.6
7536	O=C(/C=C/C(=C\C=C\C(=C/C=C/C=C(\C=C\C=C(/C=C/C=1C(C)(C)C[C@H](O)CC=1C)\C)/C)\C)/C)[C@]1(C)C(C)(C)C[C@@H](O)C1	Indian Approved Name=capsicum oleoresin;oleoresin capsicum	-7.6
7585	O=C(N[C@@]1(C(C)C)C(=O)N2[C@@H](C(CC)(C)C)C(=O)N3[C@H]([C@@]2(O)O1)CCC3)[C@@H]1C[N+@H](C)[C@@H]2[C@@H](c3c4c([nH]cc4C2)ccc3)C1	FDA Approved Drug=ERGOLOID MESYLATES	-7.6
7593	O([C@@H]1[C@H](O)[C@H](O)[C@H](CO)O[C@H]1Oc1cc([O-])c2C(=O)C=C(c3cc(O)c(O)cc3)Oc2c1)[C@H]1[C@H](O)[C@H](O)[C@H](O)[C@@H](C)O1	Traditional Herbal Isolate=lonicerin;veronicastroside	-7.6
7627	O=C1[C@H](O)CC(C)(C)C(/C=C/C(=C\C=C\C(=C/C=C/C=C(\C=C\C=C(/C=C/C2=C(C)C(=O)[C@H](O)CC2(C)C)\C)/C)\C)/C)=C1C	Indian Approved Name=astaxanthin complex	-7.6
7638	O[C@H]1C[C@](O)(C)C(=C=C/C(=C\C=C\C(=C/C=C/C=C(\C=C\C=C(/C=C/[C@]23C(C)(C)C[C@@H](O)C[C@]2(C)O3)\C)/C)\C)/C)C(C)(C)C1	Traditional Herbal Isolate=neoxanthin	-7.6
7668	O([C@@H](C)[C@@]1(O)[C@]2(C)[C@@H](OC(=O)c3ccccc3)C[C@H]3[C@](O)([C@H](O)C=C4[C@]3(C)CC[C@@H](O)C4)[C@@]2(O)CC1)C(=O)c1ccccc1	Traditional Herbal Isolate=dibenzoylgagaimol	-7.6
7726	O(C)c1c(O)c2Oc3c(OC)cc4c([C@@H]([N+@@H](C)CC4)Cc4ccc(Oc5c(OC)ccc(c5)C[C@H]5[N+@H](C)CCc(c25)c1)cc4)c3	Traditional Herbal Isolate=fangchinoline	-7.6
7791	O=C(N[C@@]1(C(C)C)C(=O)N2[C@@H](Cc3ccccc3)C(=O)N3[C@H]([C@@]2(O)O1)CCC3)[C@H]1C[N+@H](C)[C@@H]2[C@H](c3c4c([nH]cc4C2)ccc3)C1	NPC Approved Name=dihydroergocristine mesylate	-7.6
7806	O(C)c1c(OC)cc2c([C@@H](Cc3ccc(Oc4c(O)ccc(C[C@H]5[N+@@H](C)CCc6c5cc(OC)c(O)c6)c4)cc3)[N+@@H](C)CC2)c1	Traditional Herbal Isolate=dauricinoline	-7.6
7829	O=C(O[C@H]1C(C)(C)[C@@H]2[C@](C)([C@@H]3[C@](C)([C@]4(C)C([C@H]5[C@@H](C)[C@H](CO)CC[C@]5(C(=O)[O-])CC4)=CC3)CC2)CC1)/C=C/c1ccc(O)cc1	Traditional Herbal Isolate=rubicoumaric acid	-7.6
7847	O=C([O-])[C@H]1[C@H](O)[C@H](O)[C@@H](O)[C@H](Oc2cc([O-])c3C(=O)C=C(c4ccc(O[C@H]5[C@@H](O)[C@H](O)[C@@H](O)[C@@H](C(=O)[O-])O5)cc4)Oc3c2)O1	Traditional Herbal Isolate=apigenin-7-diglucuronide	-7.6
7854	O=C([O-])[C@H]1[C@H](O)[C@@H](O)[C@@H](O)[C@H](Oc2cc([O-])c3C(=O)C=C(c4ccc(O[C@H]5[C@@H](O)[C@H](O)[C@@H](O)[C@H](C(=O)[O-])O5)cc4)Oc3c2)O1	Traditional Herbal Isolate=apigenin-7-diglucuronide	-7.6
7859	O=C([O-])[C@H]1[C@H](O)[C@@H](O)[C@@H](O)[C@H](Oc2cc([O-])c3C(=O)C=C(c4ccc(O[C@H]5[C@@H](O)[C@@H](O)[C@@H](O)[C@H](C(=O)[O-])O5)cc4)Oc3c2)O1	Traditional Herbal Isolate=apigenin-7-diglucuronide	-7.6
8108	O(C[C@H]1[C@H](O)[C@@H](OC)[C@H](O)[C@H](O[C@@H]2C[C@]3(O)[C@@](C)([C@@H]4[C@@H]([C@]5(O)[C@@](C)([C@H](C6=CC(=O)OC6)CC5)CC4)CC3)CC2)O1)[C@@H]1[C@@H](C)O[C@H](O)C[C@H]1O	Traditional Herbal Isolate=periplocin	-7.6
8124	O(C[C@H]1[C@H](O)[C@@H](O)[C@H](O)[C@H](O[C@@H]2C[C@]3(O)[C@@](CO)([C@@H]4[C@@H]([C@]5(O)[C@@](C)([C@H](C6=CC(=O)OC6)CC5)CC4)CC3)CC2)O1)[C@@H]1[C@@H](C)O[C@H](O)C[C@H]1O	Traditional Herbal Isolate=erysimosol	-7.6
8144	Clc1c([C@@]2(Cn3ncnc3)O[C@H](COc3ccc(N4CCN(c5ccc(N6C(=O)N([C@H](CC)C)N=C6)cc5)CC4)cc3)CO2)ccc(Cl)c1	Indian Approved Name=itraconazole Australia Approved Name=ITRACONAZOLE FDA Approved Drug=ITRACONAZOLE	-7.6
8173	O=C([O-])[C@@H]1[C@@H](O)[C@@H](O)[C@@H](O)[C@H](O[C@@H]2[C@H](O)[C@@H](O)[C@H](CO)O[C@H]2Oc2c(O)cc3/[N+](=C\C=C\4/C=C(C(=O)[O-])[N+H2][C@H](C(=O)[O-])C/4)/[C@@H](C(=O)[O-])Cc3c2)O1	Traditional Herbal Isolate=iso-amaranthin	-7.6
8176	O=C([O-])[C@@H]1[C@H](O)[C@@H](O)[C@@H](O)[C@H](O[C@@H]2[C@H](O)[C@@H](O)[C@H](CO)O[C@H]2Oc2c(O)cc3/[N+](=C\C=C\4/C=C(C(=O)[O-])[N+H2][C@H](C(=O)[O-])C/4)/[C@@H](C(=O)[O-])Cc3c2)O1	Traditional Herbal Isolate=iso-amaranthin	-7.6
8184	O=C([O-])[C@@H]1[C@H](O)[C@@H](O)[C@@H](O)[C@H](O[C@@H]2[C@H](O)[C@@H](O)[C@H](CO)O[C@H]2Oc2c(O)cc3/[N+](=C\C=C\4/C=C(C(=O)[O-])[N+H2][C@@H](C(=O)[O-])C/4)/[C@@H](C(=O)[O-])Cc3c2)O1	Traditional Herbal Isolate=iso-amaranthin	-7.6
8221	Clc1c(OC)cc2cc1N(C)C(=O)C[C@@H](OC(=O)[C@@H](N(C(=O)CC(C)C)C)C)[C@]1(C)O[C@@H]1[C@H](C)C1OC(=O)NC(O)([C@@H](OC)/C=C/C=C(/C)\C2)C1	Traditional Herbal Isolate=maytanvaline	-7.6
8352	P(=O)(OP(=O)(OC[C@H]1[C@H](O)[C@@H](O)[C@@H](n2c3ncnc(N)c3nc2)O1)[O-])(OC[C@H](O)[C@@H](O)[C@@H](O)CN1c2c(N=C3C(=O)NC(=O)N=C13)cc(C)c(C)c2)[O-]	NPC Approved Name=flavitan	-7.6
8396	O=C(O[C@H]1[C@@H](O)[C@H](C)O[C@@H](O[C@H]2[C@H](C)O[C@H](O[C@H]3[C@H](C)O[C@H](O[C@@H]4C[C@H]5[C@@](C)([C@H]6[C@H]([C@]7(O)[C@](C)([C@H](C8=CC(=O)OC8)CC7)CC6)CC5)CC4)C[C@H]3O)C[C@H]2O)C1)C	FDA Approved Drug=ACETYLDIGITOXIN	-7.6
8407	O=CO[C@@H]1[C@@H]([C@@]2(C)[C@](O)([C@@H]3[C@@H]([C@]4(C)[C@@H](C[C@@H](O[C@H]5O[C@@H](C)[C@@H](O[C@H]6O[C@H](C)[C@H](O[C@@H]7O[C@@H](C)[C@H](O)[C@H](O)C7)[C@@H](O)C6)[C@@H](O)C5)CC4)CC3)CC2)C1)C1=CC(=O)OC1	Traditional Herbal Isolate=gitaloxin	-7.6
8513	O=C(O[C@H]1[C@H](C)[C@@H](O)[C@@H](C)[C@H](O)[C@H](C)/C=C/C=C(\C)/C(=O)NC=2C(=O)c3c([O-])c(C)c4O[C@](C)(C(=O)c4c3C3=NC4([N+H2]C=23)CC[N+H](CC(C)C)CC4)O/C=C/[C@H](OC)[C@H]1C)C	WHO Essential Medicine=rifabutin FDA Approved Drug=RIFABUTIN	-7.6
8515	O=C([O-])c1cc([O-])c2C(=O)c3c(O[C@H]4[C@@H](O)[C@H](O)[C@H](O)[C@H](CO)O4)cccc3[C@@H]([C@H]3c4c(c([O-])cc(C(=O)[O-])c4)C(=O)c4c(O[C@H]5[C@@H](O)[C@H](O)[C@H](O)[C@H](CO)O5)cccc34)c2c1	NPC Approved Name=sennoside	-7.6
8520	O(C[C@H]1[C@@H](O)[C@@H](O)[C@H](O)[C@H](O[C@@H]2[C@H](OC)[C@@H](O)[C@@H](O[C@@H]3C[C@H]4[C@@](C)([C@H]5[C@H]([C@]6(O)[C@](C)([C@@H](C7=CC(=O)OC7)CC6)CC5)CC4)CC3)O[C@@H]2C)O1)[C@H]1[C@@H](O)[C@H](O)[C@H](O)[C@H](CO)O1	Traditional Herbal Isolate=thevetin a	-7.6
8524	S(=O)(=O)([O-])c1cc(N)c2C(=O)/C(=N\Nc3c(C)cc(-c4cc(C)c(N/N=C/5\C(=O)c6c(N)cc(S(=O)(=O)[O-])cc6C=C\5S(=O)(=O)[O-])cc4)cc3)/C(S(=O)(=O)[O-])=Cc2c1	FDA Approved Drug=TRYPAN BLUE	-7.6
8525	O([C@@H]1[C@@H](O[C@H]2[C@@H](O)[C@@H](O)[C@H](O)[C@@H](C)O2)[C@@H](O[C@@H]2CC=3[C@](C)([C@@H]4[C@@H]([C@H]5[C@@](C)([C@H]6[C@@H](C)[C@H]7[N+H]([C@@H]6C5)C[C@@H](C)CC7)CC4)CC=3)CC2)O[C@H](CO)[C@H]1O)[C@H]1[C@@H](O)[C@@H](O)[C@@H](O)[C@H](CO)O1	Traditional Herbal Isolate=solanine	-7.6
8534	O([C@@H]1[C@H](O[C@H]2[C@@H](O)[C@H](O)[C@H](O)[C@H](C)O2)[C@H](O[C@H]2CC=3[C@](C)([C@H]4[C@H]([C@H]5[C@@](C)([C@H]6[C@@H](C)[C@@H]7[N+H]([C@H]6C5)C[C@@H](C)CC7)CC4)CC=3)CC2)O[C@H](CO)[C@H]1O)[C@@H]1[C@@H](O)[C@H](O)[C@@H](O)[C@H](CO)O1	Traditional Herbal Isolate=solanine	-7.6
8574	O(C)[C@@H]1[C@@H](O)/C(/C)=C\[C@@H](C)C(=O)C[C@H]([C@@H](C[C@H]2C[C@H](OC)[C@H](O)CC2)C)OC(=O)[C@H]2N(C(=O)C(=O)[C@]3(O)[C@H](C)CC[C@H](O3)C[C@@H](OC)/C(/C)=C\C=C\C=C\[C@@H](C)C[C@H](C)C1=O)CCCC2	Indian Approved Name=sirolimus NPC Approved Name=sirolimus Australia Approved Name=SIROLIMUS FDA Approved Drug=SIROLIMUS	-7.6
8614	O=C([O-])[C@H]1[C@@H](O)C[C@H](O[C@@H]2[C@@H](O)[C@@H]([N+H3])[C@@H](O)[C@H](C)O2)/C=C/C=C/C=C/C=C/CC/C=C/C=C/[C@H](C)[C@H](O)[C@@H](C)[C@H](C)OC(=O)C[C@H](O)C[C@H](O)C[C@@H](O)CC[C@H](O)[C@H](O)CC(=O)C[C@H]1O	China Approved Name=nystatin;Nystatin WHO Essential Medicine=nystatin Australia Approved Name=NYSTATIN FDA Approved Drug=NYSTATIN	-7.6
8659	O=C(O[C@@H]1[C@H](O)[C@H](O)[C@H](O)[C@@H](CO[C@H]2[C@@H](O)[C@H](O)[C@H](O[C@@H]3[C@@H](O)[C@@H](O)[C@H](O)[C@@H](C)O3)[C@@H](CO)O2)O1)[C@]12[C@@H]([C@H](C)[C@H](C)CC1)C=1[C@@](C)([C@]3(C)[C@@H]([C@@]4(C)[C@H]([C@@H](O)C3)[C@@](CO)(C)[C@@H](O)[C@@H](O)C4)CC=1)CC2	Traditional Herbal Isolate=madecassoside	-7.6
8710	O=C(N[C@@H]1C(=O)N[C@H](Cc2ccccc2)C(=O)N[C@@H](Cc2c3c([nH]c2)cccc3)C(=O)N[C@@H](CCCC[N+H3])C(=O)N[C@H]([C@H](O)C)C(=O)N[C@H](C(=O)N[C@H]([C@@H](O)C)CO)CSSC1)[C@@H]([N+H3])Cc1ccccc1	Indian Approved Name=octreotide FDA Approved Drug=OCTREOTIDE ACETATE	-7.6
8795	O=C(NCC(=O)N)[C@H](NC(=O)[C@H]1N(C(=O)[C@H]2NC(=O)[C@H](CC(=O)N)NC(=O)[C@@H](CCC(=O)N)NC(=O)[C@H](Cc3ccccc3)NC(=O)[C@H](Cc3ccc(O)cc3)NC(=O)[C@H]([N+H3])CSSC2)CCC1)CCC/[N+H]=C(\N)/N	FDA Approved Drug=VASOPRESSIN TANNATE	-7.6
8815	O=C([O-])[C@@H]1[C@H](O)CC2(O)OC1C[C@H](O[C@@H]1[C@@H](O)[C@@H]([N+H3])[C@@H](O)[C@H](C)O1)C=CC=CC=CC=CC=CC=CC=C[C@H](C)[C@@H]([C@H](C[C@H]([C@H](O)CC(=O)c1ccc(N)cc1)C)C)OC(=O)CC(=O)CCCC(=O)C[C@H](O)C[C@@H](O)C[C@@H](O)C2	FDA Approved Drug=CANDICIDIN	-7.6
8887	O(C[C@H](CC[C@@]1(O)[C@@H](C)[C@@H]2[C@]3(C)[C@H]([C@@H]4[C@H]([C@@]5(C)C(=CC4)C[C@H](O[C@@H]4[C@@H](O[C@H]6[C@@H](O)[C@@H](O)[C@@H](O)[C@@H](C)O6)[C@@H](O)[C@@H](O[C@@H]6[C@@H](O)[C@H](O)[C@H](O[C@H]7[C@H](O)[C@H](O)[C@H](O)[C@@H](C)O7)[C@@H](C)O6)[C@H](CO)O4)CC5)CC3)C[C@@H]2O1)C)[C@H]1[C@@H](O)[C@H](O)[C@H](O)[C@H](CO)O1	Traditional Herbal Isolate=asperoside;proto-isoerubosides	-7.6
8892	O(C[C@H](CC[C@@]1(O)[C@@H](C)[C@@H]2[C@@]3(C)[C@H]([C@H]4[C@@H]([C@@]5(C)C(=CC4)C[C@H](O[C@@H]4[C@@H](O[C@H]6[C@@H](O)[C@@H](O)[C@@H](O)[C@@H](C)O6)[C@@H](O)[C@@H](O[C@@H]6[C@@H](O)[C@H](O)[C@H](O[C@H]7[C@H](O)[C@H](O)[C@H](O)[C@@H](C)O7)[C@@H](C)O6)[C@H](CO)O4)CC5)CC3)C[C@H]2O1)C)[C@H]1[C@@H](O)[C@H](O)[C@H](O)[C@H](CO)O1	Traditional Herbal Isolate=asperoside;proto-isoerubosides	-7.6
8940	O=C(N[C@@H]1[C@H](C)OC(=O)[C@@H](C(C)C)N(C)C(=O)CN(C)C(=O)[C@@H]2N(C(=O)[C@@H](C(C)C)NC1=O)CCC2)c1c2N=C3C(C(=O)N[C@@H]4[C@@H](C)OC(=O)[C@H](C(C)C)N(C)C(=O)CN(C)C(=O)[C@H]5N(C(=O)[C@@H](C(C)C)NC4=O)CCC5)=C(N)C(=O)C(C)=C3Oc2c(C)cc1	China Approved Name=actinomycin WHO Essential Medicine=dactinomycin Indian Approved Name=dactinomycin FDA Approved Drug=DACTINOMYCIN	-7.6
9056	O=C(O[C@H]1[C@H](O)O[C@@H]2[C@@H]([C@H]1OC(=O)c1cc(O)c(O)c(O)c1)OC(=O)c1c(c(O)c(O)c(O)c1)-c1c(O)c(O)c(O)cc1C(=O)OC2)c1c(Oc2c(O)c(O)c3-c4c(O)c(O)c(O)cc4C(=O)O[C@H]4[C@H](OC(=O)c5cc(O)c(O)c(O)c5)[C@@H](O)[C@H](OC(=O)c5cc(O)c(O)c(O)c5)O[C@H]4COC(=O)c3c2)c(O)c(O)c(O)c1	Traditional Herbal Isolate=oenothein a	-7.6
4413	Clc1ccc(C2CCC(C3=C([O-])C(=O)c4c(C3=O)cccc4)CC2)cc1	FDA Approved Drug=ATOVAQUONE	-7.5
4544	O[C@]12[C@@H](c3cc4OCOc4cc3)OC[C@H]1[C@@H](c1cc3OCOc3cc1)OC2	Traditional Herbal Isolate=iso-paulownin	-7.5
4825	O=C1c2c(C(=C3c4c(C(=O)c5c3cccc5)cccc4)c3c1cccc3)cccc2	Traditional Herbal Isolate=dianthrone glucoside	-7.5
5015	Clc1cc2N(C(=O)c3c(C)cccc3)CC/C(=N/OS(=O)(=O)[O-])/c2cc1	NPC Approved Name=alilusem	-7.5
5188	Fc1c(N2c3nc(N4C[C@@H]([N+H3])CC4)c(F)cc3C(=O)C(C(=O)[O-])=C2)ccc(F)c1	NPC Approved Name=tosufloxacin	-7.5
6304	O(C)c1c(O)ccc(C=2Oc3c([C@H]4[C@@H](O)[C@@H](O)[C@H](O)[C@H](CO)O4)c(O)cc([O-])c3C(=O)C=2)c1	Traditional Herbal Isolate=scoparin	-7.5
6441	O[C@@H]1C(C)(C)[C@H]2[C@](C)([C@H]3[C@@](C)(C45[C@@H]([C@H]6[C@](O)(C)C[C@H](/C=C(\C)/C)OC6(OC4)C5)CC3)CC2)CC1	Traditional Herbal Isolate=jujubogenin	-7.5
6464	O[C@@H]1[C@@H]([C@H]2[C@]3(C)[C@](C)(C=4[C@@H]([C@]5(C)[C@H](C(C)(C)[C@@H](O)CC5)CC=4)CC3)CC2)C[C@@H]([C@@H]2C(C)(C)O2)O1	Traditional Herbal Isolate=melianol	-7.5
6533	O[C@@](CC/C=C(\C)/C)(C)[C@]1(O)[C@@H]2[C@@H](O)C[C@H]3[C@@](C)([C@]2(C)CC1)CC[C@H]1C(C)(C)[C@@H](O)CC[C@@]31C	Traditional Herbal Isolate=betulafolienetetraol	-7.5
6628	O=C1C(C)=C(C)C[C@@H]([C@@]2(C)O[C@H](O)C34O[C@@](O)([C@H]5[C@H]([C@]6(C)C(=O)CC=CC6=CC5)CC3)CCC24)O1	Traditional Herbal Isolate=withaphysalin	-7.5
6632	O=C1C(C)=C(C)C[C@@H]([C@@]2(C)O[C@@H](O)C34O[C@](O)([C@@H]5[C@@H]([C@@]6(C)C(=O)CC=CC6=CC5)CC3)CCC24)O1	Traditional Herbal Isolate=withaphysalin	-7.5
6733	O[C@@H](C(O)(C)C)[C@H]1O[C@@H](O)[C@@H]([C@H]2[C@]3(C)[C@](C)(C=4[C@@H]([C@]5(C)[C@H](C(C)(C)[C@@H](O)CC5)CC=4)CC3)CC2)C1	Traditional Herbal Isolate=melianotriol	-7.5
6859	O=C1[C@H](C)[C@@H](O)[C@@H](C)CCC[C@@]2(C)O[C@H]2C[C@@H](/C(=C\c2nc(C)sc2)/C)OC(=O)C[C@H](O)C1(C)C	NPC Approved Name=epothilone b	-7.5
6965	O(C)[C@@H]1[C@H](O)[C@@H](C)O[C@H](O[C@@H]2C[C@H]3[C@@](C)([C@H]4[C@H]([C@@]5(O)[C@@](C)([C@@H](C6=CC(=O)OC6)CC5)CC4)CC3)CC2)C1	Traditional Herbal Isolate=somalin	-7.5
6981	O([C@@H]1[C@@H](O)[C@@H](O)[C@@H](O)[C@H](C)O1)[C@@H]1C[C@H]2[C@@](C)([C@@H]3[C@H]([C@]4(O)[C@](C)([C@H](C5=CC(=O)OC5)CC4)CC3)CC2)CC1	Traditional Herbal Isolate=evomonoside	-7.5
6985	O([C@@H]1[C@@H](O)[C@H](O)[C@@H](O)[C@@H](C)O1)[C@@H]1C[C@H]2[C@@](C)([C@H]3[C@@H]([C@]4(O)[C@](C)([C@H](C5=CC(=O)OC5)CC4)CC3)CC2)CC1	Traditional Herbal Isolate=evomonoside	-7.5
7016	O=C1C2(O)C34[C@@](C)(O1)[C@H]1OC(=O)[C@H]5[C@](C)([C@@H]3C(=O)C(O4)(OC5)[C@@H]3[C@@H]([C@]4(C)C(=O)C=CCC54OC5C3)CC2)C1	Traditional Herbal Isolate=physalin b	-7.5
7021	S(=O)([O-])(=NC(=O)NC1CCCCC1)c1ccc(CCN2C(=O)C(C)(C)c3c(C2=O)cc(OC)cc3)cc1	China Approved Name=gliquidone	-7.5
7090	O(C)[C@@H]1[C@@H](O)[C@H](C)O[C@H](O[C@@H]2C[C@H]3[C@@](C)([C@@H]4[C@@H]([C@]5(O)[C@](C)([C@@H]([C@@H](O)C5)C5=CC(=O)OC5)CC4)CC3)CC2)C1	Traditional Herbal Isolate=deacetylo-leandrin	-7.5
7122	C(=C\C=C\C=C(/C=C/C=C(\C=C\C=1C(C)(C)CCCC=1C)/C)\C)(\C=C\C=C(/C=C/C=1C(C)(C)CCCC=1C)\C)/C	Traditional Herbal Isolate=carotene;beta-carotenoid Indian Approved Name=beta carotene;beta-carotene;betacarotene bp;natural beta carotene FDA Approved Drug=BETA CAROTENE	-7.5
7163	O(C)[C@H]1[C@H](O)[C@@H](C)O[C@H](O[C@H]2C[C@@H]3[C@](C)([C@@H]4C(=O)[C@@H](O)[C@@]5(C)[C@H](C6=CC(=O)OC6)CC[C@@]5(O)[C@@H]4CC3)CC2)C1	Traditional Herbal Isolate=caudoside;sarmutoside	-7.5
7388	O[C@@H]1C2Oc3c(O)c(-c4c(O)c5OC6[C@@H](O)C=C[C@H]7[C@@H]8[N+@@H](C)CCC67c5c(c4)C8)cc4c3C32[C@H]([C@@H]([N+@H](C)CC3)C4)C=C1	Traditional Herbal Isolate=pseudomorphine	-7.5
7398	O[C@H]1C2Oc3c(O)c(-c4c(O)c5OC6[C@@H](O)C=C[C@H]7[C@@H]8[N+@H](C)CCC67c5c(c4)C8)cc4c3C32[C@H]([C@H]([N+@@H](C)CC3)C4)C=C1	Traditional Herbal Isolate=pseudomorphine	-7.5
7438	O([C@H]1[C@@H](O)[C@H](O)[C@H](O)[C@H](CO)O1)[C@H]1CC=2[C@@](C)([C@@H]3[C@@H]([C@@H]4[C@](C)([C@H]5[C@@H](C)[C@]6(O[C@H]5C4)OC[C@H](C)CC6)CC3)CC=2)CC1	Traditional Herbal Isolate=trillin	-7.5
7456	O=C(N[C@@]1(C(C)C)C(=O)N2[C@@H](CC(C)C)C(=O)N3[C@H]([C@]2(O)O1)CCC3)[C@H]1C[N+@@H](C)[C@@H]2[C@@H](c3c4c([nH]cc4C2)ccc3)C1	NPC Approved Name=dihydro-alpha-ergocryptine	-7.5
7499	O[C@H]1C=C(C)[C@@H](/C=C/C(=C\C=C\C(=C/C=C/C=C(\C=C\C=C(\C)/[C@H]2O[C@@]3(C)C(C(C)(C)C[C@@H](O)C3)=C2)/C)\C)/C)C(C)(C)C1	Traditional Herbal Isolate=flavoxanthin	-7.5
7501	O[C@@H]1C=C(C)[C@@H](/C=C/C(=C\C=C\C(=C/C=C/C=C(\C=C\C=C(\C)/[C@H]2O[C@]3(C)C(C(C)(C)C[C@@H](O)C3)=C2)/C)\C)/C)C(C)(C)C1	Traditional Herbal Isolate=chrysanthemaxanthin	-7.5
7502	O[C@H]1C=C(C)[C@@H](/C=C/C(=C\C=C\C(=C/C=C/C=C(\C=C\C=C(\C)/[C@@H]2O[C@]3(C)C(C(C)(C)C[C@@H](O)C3)=C2)/C)\C)/C)C(C)(C)C1	Traditional Herbal Isolate=chrysanthemaxanthin	-7.5
7503	O[C@@H]1C=C(C)[C@H](/C=C/C(=C\C=C\C(=C/C=C/C=C(\C=C\C=C(\C)/[C@@H]2O[C@]3(C)C(C(C)(C)C[C@@H](O)C3)=C2)/C)\C)/C)C(C)(C)C1	Traditional Herbal Isolate=chrysanthemaxanthin	-7.5
7528	O[C@@H]1C=C(C)[C@@H](/C=C/C(=C/C=C\C(=C/C=C/C=C(\C=C/C=C(/C=C/[C@]23C(C)(C)C[C@H](O)C[C@]2(C)O3)\C)/C)\C)/C)C(C)(C)C1	Traditional Herbal Isolate=taraxanthin	-7.5
7558	O([C@H]1[C@H](O)[C@H](Oc2c(OC)c([O-])c3C(=O)C=C(c4ccccc4)Oc3c2)O[C@@H](C)[C@H]1O)[C@H]1[C@@H](O)[C@H](O)[C@H](O)[C@@H](CO)O1	Traditional Herbal Isolate=7-methoxy-baicalein	-7.5
7562	O([C@H]1[C@H](O)[C@H](Oc2c(OC)c([O-])c3C(=O)C=C(c4ccccc4)Oc3c2)O[C@@H](C)[C@H]1O)[C@H]1[C@H](O)[C@H](O)[C@H](O)[C@@H](CO)O1	Traditional Herbal Isolate=7-methoxy-baicalein	-7.5
7567	O([C@H]1[C@H](O)[C@H](Oc2c(OC)c([O-])c3C(=O)C=C(c4ccccc4)Oc3c2)O[C@H](C)[C@H]1O)[C@H]1[C@@H](O)[C@H](O)[C@H](O)[C@H](CO)O1	Traditional Herbal Isolate=7-methoxy-baicalein	-7.5
7583	O=C(N[C@@]1(C(C)C)C(=O)N2[C@@H](C(CC)(C)C)C(=O)N3[C@H]([C@@]2(O)O1)CCC3)[C@H]1C[N+@@H](C)[C@H]2[C@H](c3c4c([nH]cc4C2)ccc3)C1	FDA Approved Drug=ERGOLOID MESYLATES	-7.5
7599	O(C[C@@H]1[C@@H](O)[C@H](O)[C@@H](O)[C@H](OC2=C(c3ccc(O)cc3)Oc3c(c([O-])cc(O)c3)C2=O)O1)[C@H]1[C@@H](O)[C@@H](O)[C@H](O)[C@H](C)O1	Traditional Herbal Isolate=kaempferol-3-robinobioside	-7.5
7622	O=C(N[C@H]1C(=O)N2[C@@H](C(=O)OCOC(=O)[C@H]3C(C)(C)S(=O)(=O)[C@@H]4N3C(=O)C4)C(C)(C)S[C@H]12)[C@@H]([N+H3])c1ccccc1	Indian Approved Name=sultamicillin	-7.5
7725	O(C)c1c(O)c2Oc3c(OC)cc4c([C@@H]([N+@H](C)CC4)Cc4ccc(Oc5c(OC)ccc(c5)C[C@H]5[N+@H](C)CCc(c25)c1)cc4)c3	Traditional Herbal Isolate=fangchinoline	-7.5
7767	O=C(O[C@H]1[C@H](O)[C@H](Oc2c(C)c3OC(=O)C(NC(=O)c4cc(C/C=C(\C)/C)c(O)cc4)=C([O-])c3cc2)OC(C)(C)[C@@H]1OC)N	NPC Approved Name=novobiocin FDA Approved Drug=NOVOBIOCIN SODIUM	-7.5
7770	O=[N+]([O-])c1cc([C@H]2C(C(=O)OCCN3CC[N+H](C(c4ccccc4)c4ccccc4)CC3)=C(C)NC(C)=C2C(=O)OC)ccc1	NPC Approved Name=manidipine	-7.5
7802	O(C)c1c(OC)cc2c([C@@H](Cc3ccc(Oc4c(O)ccc(C[C@H]5[N+@H](C)CCc6c5cc(OC)c(O)c6)c4)cc3)[N+@@H](C)CC2)c1	Traditional Herbal Isolate=dauricinoline	-7.5
7828	O=C(O[C@H]1C(C)(C)[C@@H]2[C@](C)([C@H]3[C@@](C)([C@@]4(C)C([C@H]5[C@H](C)[C@H](CO)CC[C@]5(C(=O)[O-])CC4)=CC3)CC2)CC1)/C=C/c1ccc(O)cc1	Traditional Herbal Isolate=rubicoumaric acid	-7.5
7830	O=C(O[C@H]1C(C)(C)[C@@H]2[C@](C)([C@@H]3[C@](C)([C@]4(C)C([C@H]5[C@H](C)[C@H](CO)CC[C@@]5(C(=O)[O-])CC4)=CC3)CC2)CC1)/C=C/c1ccc(O)cc1	Traditional Herbal Isolate=rubicoumaric acid	-7.5
7836	O=C(O[C@H]1C(C)(C)[C@H]2[C@](C)([C@@H]3[C@](C)([C@@]4(C)C([C@H]5[C@H](C)[C@@H](CO)CC[C@]5(C(=O)[O-])CC4)=CC3)CC2)CC1)/C=C/c1ccc(O)cc1	Traditional Herbal Isolate=rubicoumaric acid	-7.5
7856	O=C([O-])[C@H]1[C@H](O)[C@@H](O)[C@@H](O)[C@H](Oc2cc([O-])c3C(=O)C=C(c4ccc(O[C@H]5[C@H](O)[C@@H](O)[C@@H](O)[C@H](C(=O)[O-])O5)cc4)Oc3c2)O1	Traditional Herbal Isolate=apigenin-7-diglucuronide	-7.5
7858	O=C([O-])[C@H]1[C@H](O)[C@H](O)[C@H](O)[C@H](Oc2cc([O-])c3C(=O)C=C(c4ccc(O[C@H]5[C@H](O)[C@@H](O)[C@@H](O)[C@H](C(=O)[O-])O5)cc4)Oc3c2)O1	Traditional Herbal Isolate=apigenin-7-diglucuronide	-7.5
7920	O([C@H]1[C@H](C)O[C@H](O[C@@H]2C[C@H]3[C@@](C)([C@@H]4[C@@H]([C@]5(O)[C@](C)([C@H](C6=CC(=O)OC6)CC5)CC4)CC3)CC2)C[C@H]1O)[C@@H]1O[C@@H](C)[C@H](O)[C@H](O)C1	Traditional Herbal Isolate=8-beta-hydroxy-digitoxigenin	-7.5
8110	O(C[C@H]1[C@H](O)[C@H](OC)[C@@H](O)[C@H](O[C@@H]2C[C@]3(O)[C@@](C)([C@H]4[C@@H]([C@]5(O)[C@@](C)([C@H](C6=CC(=O)OC6)CC5)CC4)CC3)CC2)O1)[C@@H]1[C@H](C)O[C@H](O)C[C@@H]1O	Traditional Herbal Isolate=periplocin	-7.5
8111	O(C[C@@H]1[C@H](O)[C@H](OC)[C@H](O)[C@H](O[C@@H]2C[C@]3(O)[C@@](C)([C@H]4[C@@H]([C@]5(O)[C@@](C)([C@H](C6=CC(=O)OC6)CC5)CC4)CC3)CC2)O1)[C@@H]1[C@H](C)O[C@H](O)C[C@H]1O	Traditional Herbal Isolate=periplocin	-7.5
8118	O(C[C@@H]1[C@H](O)[C@H](OC)[C@H](O)[C@H](O[C@@H]2C[C@]3(O)[C@@](C)([C@H]4[C@H]([C@]5(O)[C@@](C)([C@H](C6=CC(=O)OC6)CC5)CC4)CC3)CC2)O1)[C@@H]1[C@@H](C)O[C@H](O)C[C@H]1O	Traditional Herbal Isolate=periplocin	-7.5
8127	O(C[C@@H]1[C@H](O)[C@H](O)[C@H](O)[C@H](O[C@@H]2C[C@]3(O)[C@@](CO)([C@H]4[C@@H]([C@]5(O)[C@@](C)([C@H](C6=CC(=O)OC6)CC5)CC4)CC3)CC2)O1)[C@@H]1[C@H](C)O[C@H](O)C[C@H]1O	Traditional Herbal Isolate=erysimosol	-7.5
8145	Clc1c([C@@]2(Cn3ncnc3)O[C@H](COc3ccc(N4CCN(c5ccc(N6C(=O)N([C@@H](CC)C)N=C6)cc5)CC4)cc3)CO2)ccc(Cl)c1	Indian Approved Name=itraconazole Australia Approved Name=ITRACONAZOLE FDA Approved Drug=ITRACONAZOLE	-7.5
8159	FC(F)(F)C(=O)N[C@H]1[C@H](O)[C@@H](C)O[C@H](O[C@@H]2c3c([O-])c4C(=O)c5c(OC)cccc5C(=O)c4c([O-])c3C[C@@](O)(C(=O)COC(=O)CCCC)C2)C1	FDA Approved Drug=VALRUBICIN	-7.5
8164	FC(F)(F)C(=O)N[C@H]1[C@@H](O)[C@@H](C)O[C@@H](O[C@@H]2c3c([O-])c4C(=O)c5c(OC)cccc5C(=O)c4c([O-])c3C[C@@](O)(C(=O)COC(=O)CCCC)C2)C1	FDA Approved Drug=VALRUBICIN	-7.5
8171	FC(F)(F)C(=O)N[C@H]1[C@@H](O)[C@H](C)O[C@H](O[C@@H]2c3c([O-])c4C(=O)c5c(OC)cccc5C(=O)c4c([O-])c3C[C@@](O)(C(=O)COC(=O)CCCC)C2)C1	FDA Approved Drug=VALRUBICIN	-7.5
8180	O=C([O-])[C@@H]1[C@@H](O)[C@@H](O)[C@@H](O)[C@H](O[C@@H]2[C@H](O)[C@H](O)[C@H](CO)O[C@H]2Oc2c(O)cc3/[N+](=C\C=C\4/C=C(C(=O)[O-])[N+H2][C@@H](C(=O)[O-])C/4)/[C@@H](C(=O)[O-])Cc3c2)O1	Traditional Herbal Isolate=iso-amaranthin	-7.5
8405	O=CO[C@H]1[C@H]([C@]2(C)[C@@](O)([C@H]3[C@H]([C@]4(C)[C@H](C[C@H](O[C@@H]5O[C@@H](C)[C@H](O[C@H]6O[C@@H](C)[C@H](O[C@@H]7O[C@H](C)[C@H](O)[C@H](O)C7)[C@@H](O)C6)[C@@H](O)C5)CC4)CC3)CC2)C1)C1=CC(=O)OC1	Traditional Herbal Isolate=gitaloxin	-7.5
8408	O=CO[C@H]1[C@@H]([C@@]2(C)[C@](O)([C@H]3[C@@H]([C@@]4(C)[C@H](C[C@H](O[C@@H]5O[C@H](C)[C@H](O[C@@H]6O[C@@H](C)[C@H](O[C@@H]7O[C@@H](C)[C@@H](O)[C@@H](O)C7)[C@@H](O)C6)[C@@H](O)C5)CC4)CC3)CC2)C1)C1=CC(=O)OC1	Traditional Herbal Isolate=gitaloxin	-7.5
8417	O=CO[C@@H]1[C@@H]([C@@]2(C)[C@](O)([C@@H]3[C@H]([C@]4(C)[C@H](C[C@@H](O[C@H]5O[C@H](C)[C@H](O[C@@H]6O[C@H](C)[C@H](O[C@H]7O[C@@H](C)[C@H](O)[C@@H](O)C7)[C@H](O)C6)[C@@H](O)C5)CC4)CC3)CC2)C1)C1=CC(=O)OC1	Traditional Herbal Isolate=gitaloxin	-7.5
8518	O(C[C@H]1[C@@H](O)[C@@H](O)[C@H](O)[C@H](O[C@H]2[C@@H](OC)[C@H](O)[C@H](O[C@@H]3C[C@H]4[C@@](C)([C@H]5[C@H]([C@]6(O)[C@](C)([C@H](C7=CC(=O)OC7)CC6)CC5)CC4)CC3)O[C@@H]2C)O1)[C@H]1[C@@H](O)[C@H](O)[C@H](O)[C@H](CO)O1	Traditional Herbal Isolate=thevetin b	-7.5
8532	O([C@H]1[C@@H](O[C@H]2[C@H](O)[C@@H](O)[C@H](O)[C@@H](C)O2)[C@H](O[C@H]2CC=3[C@](C)([C@@H]4[C@H]([C@@H]5[C@](C)([C@@H]6[C@@H](C)[C@H]7[N+H]([C@H]6C5)C[C@@H](C)CC7)CC4)CC=3)CC2)O[C@H](CO)[C@@H]1O)[C@@H]1[C@@H](O)[C@H](O)[C@@H](O)[C@@H](CO)O1	Traditional Herbal Isolate=solanine	-7.5
8655	Ic1c([O-])c(I)cc2C3(OC(=O)c4c(Cl)c(Cl)c(Cl)c(Cl)c34)c3c(c(I)c([O-])c(I)c3)Oc12	FDA Approved Drug=ROSE BENGAL SODIUM I-131	-7.5
8692	O=C(NCC(=O)N)[C@H](NC(=O)[C@@H]1N(C(=O)[C@H]2NC(=O)[C@@H](CC(=O)N)NC(=O)[C@@H]([C@H](O)C)NC(=O)[C@H]([C@H](CC)C)NC(=O)[C@H](Cc3ccc(O)cc3)NC(=O)[C@H]([N+H3])CSSC2)CCC1)CC(C)C	Indian Approved Name=urofollitrophin FDA Approved Drug=UROFOLLITROPIN	-7.5
8760	O=C(NCC(=O)N)[C@@H](NC(=O)[C@@H]1N(C(=O)[C@H]2NC(=O)[C@H](CC(=O)N)NC(=O)[C@H](CCC(=O)N)NC(=O)[C@H](Cc3ccccc3)NC(=O)[C@H](Cc3ccc(O)cc3)NC(=O)[C@H]([N+H3])CSSC2)CCC1)CCCC[N+H3]	FDA Approved Drug=LYPRESSIN	-7.5
8787	O=C(NCC(=O)N)[C@@H](NC(=O)[C@@H]1N(C(=O)[C@@H]2NC(=O)[C@H](CC(=O)N)NC(=O)[C@H](CCC(=O)N)NC(=O)[C@H](Cc3ccccc3)NC(=O)[C@@H](Cc3ccc(O)cc3)NC(=O)[C@H]([N+H3])CSSC2)CCC1)CCC/[N+H]=C(\N)/N	FDA Approved Drug=VASOPRESSIN TANNATE	-7.5
8796	O=C(NCC(=O)N)[C@H](NC(=O)[C@H]1N(C(=O)[C@@H]2NC(=O)[C@H](CC(=O)N)NC(=O)[C@@H](CCC(=O)N)NC(=O)[C@H](Cc3ccccc3)NC(=O)[C@@H](Cc3ccc(O)cc3)NC(=O)[C@@H]([N+H3])CSSC2)CCC1)CCC/[N+H]=C(\N)/N	FDA Approved Drug=VASOPRESSIN TANNATE	-7.5
8805	O=C([O-])[C@@H]1[C@H](O)CC2(O)OC1C[C@@H](O[C@@H]1[C@@H](O)[C@@H]([N+H3])[C@@H](O)[C@H](C)O1)C=CC=CC=CC=CC=CC=CC=C[C@H](C)[C@H]([C@H](C[C@H]([C@H](O)CC(=O)c1ccc(N)cc1)C)C)OC(=O)CC(=O)CCCC(=O)C[C@@H](O)C[C@@H](O)C[C@H](O)C2	FDA Approved Drug=CANDICIDIN	-7.5
8817	O=C([O-])[C@H]1[C@@H](O)CC2(O)OC1C[C@H](O[C@H]1[C@@H](O)[C@@H]([N+H3])[C@@H](O)[C@H](C)O1)C=CC=CC=CC=CC=CC=CC=C[C@H](C)[C@@H]([C@H](C[C@@H]([C@@H](O)CC(=O)c1ccc(N)cc1)C)C)OC(=O)CC(=O)CCCC(=O)C[C@H](O)C[C@H](O)C[C@@H](O)C2	FDA Approved Drug=CANDICIDIN	-7.5
8988	O=C(N[C@H](C(=O)N[C@H](C(=O)N[C@H](C(=O)N[C@H](C(=O)N1[C@@H](C(=O)NCC(=O)N)CCC1)CCCNC(=[N+H2])N)CC(C)C)Cc1cc2c(cc1)cccc2)Cc1ccc(O)cc1)[C@@H](NC(=O)[C@@H](NC(=O)[C@@H](NC(=O)[C@@H]1NC(=O)CC1)Cc1nc[nH]c1)Cc1c2c([nH]c1)cccc2)CO	Indian Approved Name=nafarelin FDA Approved Drug=NAFARELIN ACETATE	-7.5
9092	O=C(O[C@@H]1[C@H](C=O)OC(=O)c2c(c(O)c(O)c(O)c2)Oc2c(O)c(O)c3-c4c(O)c(O)c(O)cc4C(=O)O[C@@H]4[C@H](OC(=O)c5cc(O)c(O)c(O)c5)C([C@H](OC(=O)c5cc(O)c(O)c(O)c5)O[C@@H]4COC(=O)c3c2)OC(=O)c2c(c(O)c(O)c(O)c2)Oc2c(O)c(O)c3-c4c(O)c(O)c(O)cc4C(=O)OC[C@@H](O)C1OC(=O)c3c2)c1cc(O)c(O)c(O)c1	Traditional Herbal Isolate=woodfordin a	-7.5
4700	O=C1/C(=N\Nc2c(C)cc(N=Nc3c(C)cccc3)cc2)/c2c(cccc2)C=C1	NPC Approved Name=o-tolylazo-o-tolylazo-beta-naphthol	-7.4
5074	O[C@H]1CC=2[C@@](C)([C@@H]3[C@H]([C@H]4[C@@](C)([C@H]5[C@@H](C)[C@H]6[N+H]([C@H]5C4)C[C@H](C)CC6)CC3)CC=2)CC1	Traditional Herbal Isolate=solanidine	-7.4
5319	O=C(O[C@H]1[C@@]2(C)[C@@H]([C@H]3[C@@H]([C@]4(C)C(=CC(=O)CC4)CC3)CC2)CC1)CCC1CCCC1	NPC Approved Name=amyltricresol secondary	-7.4
5820	Fc1ccc(Cn2c(N3CCC(N(C)C4=NC=CC(=O)N4)CC3)nc3c2cccc3)cc1	Indian Approved Name=mizolastine	-7.4
6104	Clc1cc2[C@@H](O)CCCN(C(=O)c3c(C)cc(NC(=O)c4c(C)cccc4)cc3)c2cc1	FDA Approved Drug=TOLVAPTAN	-7.4
6127	O=C(Oc1ccccc1)[C@H](C(=O)N[C@H]1C(=O)N2[C@@H](C(=O)[O-])C(C)(C)S[C@H]12)c1ccccc1	NPC Approved Name=carfecillin	-7.4
6330	Fc1ccc(C(CCC[N+H]2CCC(N3C(=O)Nc4c3cccc4)CC2)c2ccc(F)cc2)cc1	FDA Approved Drug=PIMOZIDE	-7.4
6337	O=C1C(C)=C2[C@@]([C@@]34OC(=O)C(C)=C3C[C@H]3C(=C)CCC[C@]3(C)C4)(O1)C[C@]1(C)[C@@H](C(=C)CCC1)C2	Traditional Herbal Isolate=biatractylolide	-7.4
6409	O=C([O-])[C@@]1(C)C[C@H]2[C@](C)(CC[C@]3(C)[C@]4(C)[C@@H](C(=O)C=C23)[C@@]2(C)[C@@H](C(C)(C)[C@@H](O)CC2)CC4)CC1	Indian Approved Name=glycyrrhiza glabara	-7.4
6511	F[C@@]12[C@H](O)C[C@@]3(C)[C@@](O)(C(=O)COC(=O)C(C)(C)C)[C@H](C)C[C@H]3[C@H]1CCC=1[C@@]2(C)C=CC(=O)C=1	Indian Approved Name=dexamethasone trimethyl acetate	-7.4
6516	Fc1ccc(N2CC[N+H](CCCC(=O)N[C@H]3c4c(SCc5c3cccc5)cccc4)CC2)cc1	NPC Approved Name=monatepil maleate	-7.4
6754	O=C(Oc1cc2c(cc1)CCC2)[C@@H](C(=O)N[C@H]1C(=O)N2[C@@H](C(=O)[O-])C(C)(C)S[C@H]12)c1ccccc1	NPC Approved Name=carindacillin	-7.4
6870	O=C1C2(O)C34[C@](C)(O1)[C@@H]1OC(=O)C(=C)[C@@](C)([C@@H]3C(=O)[C@](O)(O4)[C@H]3[C@H]([C@@]4(C)C(=O)C=CCC4=CC3)CC2)C1	Traditional Herbal Isolate=physalin c	-7.4
6912	ClC(Cl)[C@@H]1[C@@H](C)COC2([C@@H](C)[C@H]3[C@@]4(C)[C@@H]([C@H]5[C@H]([C@]6(C)[C@@H](O)C[C@@H](O)CC6=CC5)CC4)C[C@@H]3O2)C1	Traditional Herbal Isolate=abamagenin	-7.4
6967	O(C)[C@H]1[C@H](O)[C@H](C)O[C@@H](O[C@@H]2C[C@H]3[C@](C)([C@H]4[C@H]([C@]5(O)[C@@](C)([C@H](C6=CC(=O)OC6)CC5)CC4)CC3)CC2)C1	Traditional Herbal Isolate=somalin	-7.4
7025	FC(F)(F)c1c(NC(=O)[C@H]2[C@]3(C)[C@@H]([C@H]4[C@@H]([C@]5(C)[C@H](NC(=O)C=C5)CC4)CC3)CC2)cc(C(F)(F)F)cc1	Indian Approved Name=dutasteride FDA Approved Drug=DUTASTERIDE	-7.4
7115	O([C@H]1[C@@H](O)[C@H](O)[C@@H](O)[C@@H](C)O1)[C@@H]1C[C@]2(O)[C@@](C)([C@@H]3[C@H]([C@]4(O)[C@@](C)([C@H](C5=CC(=O)OC5)CC4)CC3)CC2)CC1	Traditional Herbal Isolate=peripalloside	-7.4
7124	C(=C\C=C\C=C(/C=C/C=C(\C=C\C=1C(C)(C)CCCC=1C)/C)\C)(\C=C\C=C(/C=C/[C@@H]1C(C)=CCCC1(C)C)\C)/C	NPC Approved Name=alpha-carotene (6'r)-isomer	-7.4
7141	O=C(OCC(=O)[C@]12[C@@]3(C)[C@@H]([C@H]4[C@@H]([C@@H](O)C3)[C@@]3(C)C(=CC(=O)C=C3)CC4)C[C@@H]1O[C@@H](C1CCCCC1)O2)C(C)C	Indian Approved Name=ciclesonide	-7.4
7157	O(C)[C@@H]1[C@@H](O)[C@@H](C)O[C@H](O[C@H]2C[C@@H]3[C@](C)([C@@H]4C(=O)[C@H](O)[C@]5(C)[C@H](C6=CC(=O)OC6)CC[C@@]5(O)[C@H]4CC3)CC2)C1	Traditional Herbal Isolate=caudoside;sarmutoside	-7.4
7168	O(C)[C@H]1[C@H](O)[C@H](C)O[C@@H](O[C@@H]2C[C@H]3[C@](C)([C@@H]4C(=O)[C@H](O)[C@@]5(C)[C@@H](C6=CC(=O)OC6)CC[C@@]5(O)[C@@H]4CC3)CC2)C1	Traditional Herbal Isolate=caudoside;sarmutoside	-7.4
7200	O(C)[C@H]1[C@H](O)[C@H](C)O[C@@H](O[C@@H]2C[C@H]3[C@@](C)([C@@H]4[C@@H](O)C(=O)[C@]5(C)[C@@H](C6=CC(=O)OC6)CC[C@@]5(O)[C@@H]4CC3)CC2)C1	Traditional Herbal Isolate=sinostroside	-7.4
7237	O=C[C@]12[C@@](O)(C[C@@H](O[C@H]3[C@@H](O)[C@@H](O)[C@@H](O)[C@H](C)O3)CC1)CC[C@H]1[C@]3(O)[C@@](C)([C@H](C4=CC(=O)OC4)CC3)CC[C@@H]21	Traditional Herbal Isolate=strophalloside	-7.4
7244	O([C@@H]1[C@H](O)[C@H](O)[C@@H](O)[C@@H](C)O1)[C@@H]1C[C@]2(O)[C@@](CO)([C@H]3[C@@H]([C@]4(O)[C@@](C)([C@H](C5=CC(=O)OC5)CC4)CC3)CC2)CC1	Traditional Herbal Isolate=convallatoxol	-7.4
7381	O[C@H]1C=C(C)[C@@H](/C=C/C(=C\C=C\C(=C/C=C/C=C(\C=C\C=C(/C=C/C=2C(C)(C)C[C@@H](O)CC=2C)\C)/C)\C)/C)C(C)(C)C1	Traditional Herbal Isolate=lutein Indian Approved Name=leutin;lutein	-7.4
7394	O[C@H]1C2Oc3c(O)c(-c4c(O)c5OC6[C@@H](O)C=C[C@@H]7[C@H]8[N+@@H](C)CCC67c5c(c4)C8)cc4c3C32[C@@H]([C@@H]([N+@H](C)CC3)C4)C=C1	Traditional Herbal Isolate=pseudomorphine	-7.4
7413	O=C(O[C@H]1[C@]2(O)O[C@@H]3[C@H](O[C@H]2O[C@H](C)C1)C[C@H]1[C@@](C=O)([C@H]2[C@@H]([C@@]4(O)[C@@](C)([C@H](C5=CC(=O)OC5)CC4)CC2)CC1)C3)C	Traditional Herbal Isolate=asclepiadin;asclepin	-7.4
7455	O=C(N[C@@]1(C(C)C)C(=O)N2[C@H](CC(C)C)C(=O)N3[C@H]([C@]2(O)O1)CCC3)[C@@H]1C[N+@@H](C)[C@@H]2[C@@H](c3c4c([nH]cc4C2)ccc3)C1	NPC Approved Name=dihydro-alpha-ergocryptine	-7.4
7480	O=C(N[C@@]1(C)C(=O)N2[C@@H](Cc3ccccc3)C(=O)N3[C@H]([C@@]2(O)O1)CCC3)[C@@H]1C=C2[C@@H]([N+@@H](C)C1)Cc1c3c([nH]c1)cccc23	Indian Approved Name=belladona tinc;ergotamine tart;belladona FDA Approved Drug=ERGOTAMINE TARTRATE	-7.4
7497	O=C(N[C@@]1(C)C(=O)N2[C@@H](Cc3ccccc3)C(=O)N3[C@H]([C@@]2(O)O1)CCC3)[C@H]1C[N+@H](C)[C@@H]2[C@H](c3c4c([nH]cc4C2)ccc3)C1	Traditional Herbal Isolate=daechu alkaloids Indian Approved Name=dihydroergotamine mesylate FDA Approved Drug=DIHYDROERGOTAMINE MESYLATE	-7.4
7509	O[C@H]1C=C(C)[C@H](/C=C/C(=C\C=C\C(=C/C=C/C=C(\C=C\C=C(\C)/[C@H]2O[C@@]3(C)C(C(C)(C)C[C@@H](O)C3)=C2)/C)\C)/C)C(C)(C)C1	Traditional Herbal Isolate=chrysanthemaxanthin	-7.4
7514	O[C@H]1C=C(C)[C@H](/C=C/C(=C\C=C\C(=C/C=C/C=C(\C=C\C=C(\C)/[C@H]2O[C@@]3(C)C(C(C)(C)C[C@H](O)C3)=C2)/C)\C)/C)C(C)(C)C1	Traditional Herbal Isolate=chrysanthemaxanthin	-7.4
7521	O[C@H]1C=C(C)[C@H](/C=C/C(=C/C=C\C(=C/C=C/C=C(\C=C/C=C(/C=C/[C@]23C(C)(C)C[C@H](O)C[C@@]2(C)O3)\C)/C)\C)/C)C(C)(C)C1	Traditional Herbal Isolate=taraxanthin	-7.4
7534	O=C(/C=C/C(=C\C=C\C(=C/C=C/C=C(\C=C\C=C(/C=C/C=1C(C)(C)C[C@H](O)CC=1C)\C)/C)\C)/C)[C@@]1(C)C(C)(C)C[C@@H](O)C1	Indian Approved Name=capsicum oleoresin;oleoresin capsicum	-7.4
7540	O=C(/C=C/C(=C\C=C\C(=C/C=C/C=C(\C=C\C=C(/C=C/C=1C(C)(C)C[C@H](O)CC=1C)\C)/C)\C)/C)[C@]1(C)C(C)(C)C[C@H](O)C1	Indian Approved Name=capsicum oleoresin;oleoresin capsicum	-7.4
7556	O([C@@H]1[C@H](O)[C@H](Oc2c(OC)c([O-])c3C(=O)C=C(c4ccccc4)Oc3c2)O[C@@H](C)[C@H]1O)[C@H]1[C@@H](O)[C@H](O)[C@H](O)[C@@H](CO)O1	Traditional Herbal Isolate=7-methoxy-baicalein	-7.4
7717	O(C)c1c(OC)cc2c3[C@H]([N+@H](C)CC2)Cc2ccc(cc2)COC=2C(=O)C4=C([N+H2]CCC4=CC=2OC)Cc2ccc(Oc13)cc2	Traditional Herbal Isolate=cissampareine	-7.4
7794	O=C(N[C@@]1(C(C)C)C(=O)N2[C@@H](Cc3ccccc3)C(=O)N3[C@H]([C@]2(O)O1)CCC3)[C@H]1C[N+@H](C)[C@@H]2[C@@H](c3c4c([nH]cc4C2)ccc3)C1	NPC Approved Name=dihydroergocristine mesylate	-7.4
7799	O(C)c1c(OC)cc2c([C@@H](Cc3ccc(Oc4c(O)ccc(C[C@@H]5[N+@H](C)CCc6c5cc(OC)c(O)c6)c4)cc3)[N+@H](C)CC2)c1	Traditional Herbal Isolate=dauricinoline	-7.4
7838	O=C(O[C@H]1C(C)(C)[C@H]2[C@](C)([C@@H]3[C@@](C)([C@]4(C)C([C@H]5[C@@H](C)[C@@H](CO)CC[C@@]5(C(=O)[O-])CC4)=CC3)CC2)CC1)/C=C/c1ccc(O)cc1	Traditional Herbal Isolate=rubicoumaric acid	-7.4
7841	O=C(O[C@@H]1C(C)(C)[C@H]2[C@](C)([C@H]3[C@](C)([C@]4(C)C([C@@H]5[C@@H](C)[C@@H](CO)CC[C@]5(C(=O)[O-])CC4)=CC3)CC2)CC1)/C=C/c1ccc(O)cc1	Traditional Herbal Isolate=rubicoumaric acid	-7.4
7843	O=C(O[C@@H]1C(C)(C)[C@H]2[C@@](C)([C@@H]3[C@](C)([C@]4(C)C([C@@H]5[C@H](C)[C@H](CO)CC[C@@]5(C(=O)[O-])CC4)=CC3)CC2)CC1)/C=C/c1ccc(O)cc1	Traditional Herbal Isolate=rubicoumaric acid	-7.4
7845	O=C([O-])[C@H]1[C@H](O)[C@@H](O)[C@@H](O)[C@H](Oc2cc([O-])c3C(=O)C=C(c4ccc(O[C@H]5[C@H](O)[C@H](O)[C@@H](O)[C@@H](C(=O)[O-])O5)cc4)Oc3c2)O1	Traditional Herbal Isolate=apigenin-7-diglucuronide	-7.4
7853	O=C([O-])[C@H]1[C@H](O)[C@H](O)[C@H](O)[C@H](Oc2cc([O-])c3C(=O)C=C(c4ccc(O[C@H]5[C@H](O)[C@H](O)[C@@H](O)[C@H](C(=O)[O-])O5)cc4)Oc3c2)O1	Traditional Herbal Isolate=apigenin-7-diglucuronide	-7.4
7881	O(C)c1c(OC)cc2c([C@H](Cc3cc(Oc4c(OC)cc5c([C@@H](Cc6ccc(OC)cc6)[N+@@H](C)CC5)c4)c(O)cc3)[N+@@H](C)CC2)c1	Traditional Herbal Isolate=neferine	-7.4
7938	O(/N=C/1\[C@H](C)[C@@H](/C(=C\C(C)C)/C)O[C@@]2(O[C@H]3C[C@H](OC(=O)[C@@H]4[C@@]/5(O)[C@@H]([C@H](O)C(C)=C4)OC\C\5=C\C=C\[C@@H](C)C/C(/C)=C\C3)C2)C\1)C	NPC Approved Name=moxidectin	-7.4
7990	O([C@H]1[C@@H](O)[C@H](O)[C@H]2O[C@@H](c3sccc3)OC[C@H]2O1)[C@H]1[C@@H]2[C@@H]([C@@H](c3cc(OC)c(O)c(OC)c3)c3c1cc1OCOc1c3)C(=O)OC2	FDA Approved Drug=TENIPOSIDE	-7.4
8105	O(C[C@H]1[C@H](O)[C@@H](OC)[C@@H](O)[C@H](O[C@@H]2C[C@]3(O)[C@@](C)([C@@H]4[C@@H]([C@]5(O)[C@@](C)([C@H](C6=CC(=O)OC6)CC5)CC4)CC3)CC2)O1)[C@@H]1[C@H](C)O[C@H](O)C[C@H]1O	Traditional Herbal Isolate=periplocin	-7.4
8106	O(C[C@@H]1[C@H](O)[C@@H](OC)[C@H](O)[C@H](O[C@@H]2C[C@]3(O)[C@@](C)([C@@H]4[C@@H]([C@]5(O)[C@@](C)([C@H](C6=CC(=O)OC6)CC5)CC4)CC3)CC2)O1)[C@@H]1[C@H](C)O[C@H](O)C[C@H]1O	Traditional Herbal Isolate=periplocin	-7.4
8119	O(C[C@H]1[C@H](O)[C@H](OC)[C@H](O)[C@H](O[C@@H]2C[C@]3(O)[C@@](C)([C@H]4[C@H]([C@]5(O)[C@@](C)([C@H](C6=CC(=O)OC6)CC5)CC4)CC3)CC2)O1)[C@@H]1[C@@H](C)O[C@H](O)C[C@H]1O	Traditional Herbal Isolate=periplocin	-7.4
8120	O(C[C@@H]1[C@H](O)[C@@H](O)[C@@H](O)[C@H](O[C@@H]2C[C@]3(O)[C@@](CO)([C@@H]4[C@@H]([C@]5(O)[C@@](C)([C@H](C6=CC(=O)OC6)CC5)CC4)CC3)CC2)O1)[C@@H]1[C@@H](C)O[C@H](O)C[C@H]1O	Traditional Herbal Isolate=erysimosol	-7.4
8167	FC(F)(F)C(=O)N[C@H]1[C@H](O)[C@H](C)O[C@H](O[C@@H]2c3c([O-])c4C(=O)c5c(OC)cccc5C(=O)c4c([O-])c3C[C@@](O)(C(=O)COC(=O)CCCC)C2)C1	FDA Approved Drug=VALRUBICIN	-7.4
8187	O=C([O-])[C@@H]1[C@H](O)[C@@H](O)[C@H](O)[C@H](O[C@@H]2[C@H](O)[C@@H](O)[C@H](CO)O[C@H]2Oc2c(O)cc3/[N+](=C\C=C\4/C=C(C(=O)[O-])[N+H2][C@@H](C(=O)[O-])C/4)/[C@@H](C(=O)[O-])Cc3c2)O1	Traditional Herbal Isolate=iso-amaranthin	-7.4
8220	Clc1c(OC)cc2cc1N(C)C(=O)C[C@@H](OC(=O)[C@@H](N(C(=O)CC(C)C)C)C)[C@]1(C)O[C@@H]1[C@H](C)C1OC(=O)NC(O)([C@H](OC)/C=C/C=C(/C)\C2)C1	Traditional Herbal Isolate=maytanvaline	-7.4
8253	O(C)[C@@H]1[C@H](OC)[C@H](O[C@H]2C[C@@H]3C(C)=C[C@H]4[C@@H]([C@H]3C2)C=C2C(=O)[C@@H](C)[C@@H](O[C@@H]3O[C@@H](C)[C@@H]([N+H](C)C)CC3)CCC[C@@H](CC)OC(=O)C[C@H]42)O[C@H](C)[C@@H]1OC	FDA Approved Drug=SPINOSAD	-7.4
8355	P(=O)(OP(=O)(OC[C@H]1[C@H](O)[C@@H](O)[C@@H](n2c3ncnc(N)c3nc2)O1)[O-])(OC[C@H](O)[C@@H](O)[C@@H](O)CN1c2c(N=C3C(=O)NC(=O)N=C13)cc(C)c(C)c2)[O-]	NPC Approved Name=flavitan	-7.4
8368	Brc1c(Br)c(Br)c2C(c3cc(S(=O)(=O)[O-])c(O)cc3)(c3cc(S(=O)(=O)[O-])c(O)cc3)OC(=O)c2c1Br	NPC Approved Name=(sulfobromophthalein)glutathione conjugate	-7.4
8410	O=CO[C@H]1[C@H]([C@]2(C)[C@](O)([C@H]3[C@H]([C@]4(C)[C@H](C[C@@H](O[C@H]5O[C@H](C)[C@H](O[C@H]6O[C@@H](C)[C@@H](O[C@@H]7O[C@H](C)[C@H](O)[C@@H](O)C7)[C@H](O)C6)[C@H](O)C5)CC4)CC3)CC2)C1)C1=CC(=O)OC1	Traditional Herbal Isolate=gitaloxin	-7.4
8411	O=CO[C@H]1[C@H]([C@]2(C)[C@](O)([C@H]3[C@H]([C@@]4(C)[C@H](C[C@H](O[C@@H]5O[C@@H](C)[C@@H](O[C@H]6O[C@@H](C)[C@H](O[C@@H]7O[C@@H](C)[C@@H](O)[C@H](O)C7)[C@H](O)C6)[C@H](O)C5)CC4)CC3)CC2)C1)C1=CC(=O)OC1	Traditional Herbal Isolate=gitaloxin	-7.4
8519	O(C[C@H]1[C@@H](O)[C@@H](O)[C@H](O)[C@H](O[C@@H]2[C@H](OC)[C@@H](O)[C@@H](O[C@@H]3C[C@H]4[C@@](C)([C@H]5[C@H]([C@]6(O)[C@](C)([C@H](C7=CC(=O)OC7)CC6)CC5)CC4)CC3)O[C@@H]2C)O1)[C@H]1[C@@H](O)[C@H](O)[C@H](O)[C@H](CO)O1	Traditional Herbal Isolate=thevetin a	-7.4
8526	O([C@H]1[C@H](O[C@@H]2[C@@H](O)[C@H](O)[C@H](O)[C@H](C)O2)[C@H](O[C@@H]2CC=3[C@@](C)([C@@H]4[C@H]([C@H]5[C@@](C)([C@H]6[C@H](C)[C@H]7[N+H]([C@H]6C5)C[C@@H](C)CC7)CC4)CC=3)CC2)O[C@@H](CO)[C@@H]1O)[C@@H]1[C@H](O)[C@@H](O)[C@@H](O)[C@@H](CO)O1	Traditional Herbal Isolate=solanine	-7.4
8530	O([C@@H]1[C@H](O[C@H]2[C@@H](O)[C@@H](O)[C@H](O)[C@@H](C)O2)[C@H](O[C@@H]2CC=3[C@](C)([C@@H]4[C@@H]([C@H]5[C@](C)([C@H]6[C@H](C)[C@@H]7[N+H]([C@@H]6C5)C[C@H](C)CC7)CC4)CC=3)CC2)O[C@H](CO)[C@@H]1O)[C@@H]1[C@@H](O)[C@@H](O)[C@H](O)[C@H](CO)O1	Traditional Herbal Isolate=solanine	-7.4
8554	O=C([O-])[C@]12[C@@H](C=3[C@](C)([C@@]4(C)[C@@H]([C@]5(C)[C@@H](C(C)(C)[C@H](O[C@H]6[C@H](O[C@H]7[C@@H](O[C@H]8[C@@H](O)[C@H](O)[C@@H](O)[C@@H](C)O8)[C@H](O)[C@@H](O)[C@@H](CO)O7)[C@H](O)[C@@H](O)CO6)CC5)CC4)CC=3)CC1)CC(C)(C)CC2	Traditional Herbal Isolate=raddeanin a	-7.4
8640	O([C@@H]1[C@H](C)O[C@@H](O[C@@H]2[C@H](C)O[C@@H](O[C@H]3[C@H](C)O[C@@H](O[C@@H]4C[C@H]5[C@@](C)([C@H]6[C@H]([C@]7(O)[C@](C)([C@H](O)C6)[C@H](C6=CC(=O)OC6)CC7)CC5)CC4)C[C@H]3O)C[C@@H]2O)C[C@@H]1O)[C@H]1[C@@H](O)[C@H](O)[C@H](O)[C@H](CO)O1	FDA Approved Drug=DESLANOSIDE	-7.4
8660	O=C(O[C@@H]1[C@H](O)[C@H](O)[C@H](O)[C@H](CO[C@@H]2[C@H](O)[C@H](O)[C@@H](O[C@H]3[C@H](O)[C@@H](O)[C@H](O)[C@@H](C)O3)[C@@H](CO)O2)O1)[C@]12[C@@H]([C@H](C)[C@@H](C)CC1)C=1[C@](C)([C@@]3(C)[C@@H]([C@@]4(C)[C@H]([C@@H](O)C3)[C@](CO)(C)[C@@H](O)[C@@H](O)C4)CC=1)CC2	Traditional Herbal Isolate=madecassoside	-7.4
8697	O=C(NCC(=O)N)[C@H](NC(=O)[C@H]1N(C(=O)[C@@H]2NC(=O)[C@H](CC(=O)N)NC(=O)[C@H]([C@H](O)C)NC(=O)[C@H]([C@H](CC)C)NC(=O)[C@H](Cc3ccc(O)cc3)NC(=O)[C@@H]([N+H3])CSSC2)CCC1)CC(C)C	Indian Approved Name=urofollitrophin FDA Approved Drug=UROFOLLITROPIN	-7.4
8701	O=C(NCC(=O)N)[C@H](NC(=O)[C@H]1N(C(=O)[C@H]2NC(=O)[C@@H](CC(=O)N)NC(=O)[C@H]([C@H](O)C)NC(=O)[C@H]([C@H](CC)C)NC(=O)[C@@H](Cc3ccc(O)cc3)NC(=O)[C@@H]([N+H3])CSSC2)CCC1)CC(C)C	Indian Approved Name=urofollitrophin FDA Approved Drug=UROFOLLITROPIN	-7.4
8712	O=C(N[C@H]1C(=O)N[C@H](Cc2ccccc2)C(=O)N[C@@H](Cc2c3c([nH]c2)cccc3)C(=O)N[C@@H](CCCC[N+H3])C(=O)N[C@H]([C@@H](O)C)C(=O)N[C@H](C(=O)N[C@H]([C@H](O)C)CO)CSSC1)[C@@H]([N+H3])Cc1ccccc1	Indian Approved Name=octreotide FDA Approved Drug=OCTREOTIDE ACETATE	-7.4
8747	O([C@@H]1[C@H](O)[C@H](O)[C@H](O[C@@H]2CC=3[C@@](C)([C@H]4[C@@H]([C@]5(O)[C@@](C)([C@@H]6[C@H](C)C7(O[C@@H]6C5)OC[C@@H](C)CC7)CC4)CC=3)CC2)O[C@H]1CO)[C@@H]1[C@@H](O[C@H]2[C@@H](O)[C@@H](O)[C@@H](O)[C@@H](CO)O2)[C@@H](O[C@@H]2[C@@H](O)[C@@H](O)[C@H](O)CO2)[C@@H](O)[C@@H](CO)O1	Traditional Herbal Isolate=steroidal saponin pod-ii	-7.4
8764	O=C(NCC(=O)N)[C@@H](NC(=O)[C@@H]1N(C(=O)[C@@H]2NC(=O)[C@H](CC(=O)N)NC(=O)[C@H](CCC(=O)N)NC(=O)[C@H](Cc3ccccc3)NC(=O)[C@@H](Cc3ccc(O)cc3)NC(=O)[C@H]([N+H3])CSSC2)CCC1)CCCC[N+H3]	FDA Approved Drug=LYPRESSIN	-7.4
8812	O=C([O-])[C@H]1[C@H](O)CC2(O)OC1C[C@H](O[C@H]1[C@@H](O)[C@@H]([N+H3])[C@@H](O)[C@H](C)O1)C=CC=CC=CC=CC=CC=CC=C[C@H](C)[C@@H]([C@H](C[C@H]([C@@H](O)CC(=O)c1ccc(N)cc1)C)C)OC(=O)CC(=O)CCCC(=O)C[C@@H](O)C[C@@H](O)C[C@H](O)C2	FDA Approved Drug=CANDICIDIN	-7.4
8894	O(C[C@H](CC[C@@]1(O)[C@@H](C)[C@H]2[C@]3(C)[C@H]([C@@H]4[C@@H]([C@]5(C)C(=CC4)C[C@@H](O[C@@H]4[C@@H](O[C@H]6[C@@H](O)[C@@H](O)[C@@H](O)[C@@H](C)O6)[C@@H](O)[C@@H](O[C@@H]6[C@@H](O)[C@H](O)[C@H](O[C@H]7[C@H](O)[C@H](O)[C@H](O)[C@@H](C)O7)[C@@H](C)O6)[C@H](CO)O4)CC5)CC3)C[C@@H]2O1)C)[C@H]1[C@@H](O)[C@H](O)[C@H](O)[C@H](CO)O1	Traditional Herbal Isolate=asperoside;proto-isoerubosides	-7.4
8895	O(C[C@@H](CC[C@@]1(O)[C@@H](C)[C@H]2[C@]3(C)[C@H]([C@@H]4[C@H]([C@]5(C)C(=CC4)C[C@@H](O[C@@H]4[C@@H](O[C@H]6[C@@H](O)[C@@H](O)[C@@H](O)[C@@H](C)O6)[C@@H](O)[C@@H](O[C@@H]6[C@@H](O)[C@H](O)[C@H](O[C@H]7[C@H](O)[C@H](O)[C@H](O)[C@@H](C)O7)[C@@H](C)O6)[C@H](CO)O4)CC5)CC3)C[C@@H]2O1)C)[C@H]1[C@@H](O)[C@H](O)[C@H](O)[C@H](CO)O1	Traditional Herbal Isolate=asperoside;proto-isoerubosides	-7.4
8935	O=C(N[C@H]1[C@@H](C)OC(=O)[C@H](C(C)C)N(C)C(=O)CN(C)C(=O)[C@H]2N(C(=O)[C@H](C(C)C)NC1=O)CCC2)c1c2N=C3C(C(=O)N[C@H]4[C@H](C)OC(=O)[C@@H](C(C)C)N(C)C(=O)CN(C)C(=O)[C@@H]5N(C(=O)[C@@H](C(C)C)NC4=O)CCC5)=C(N)C(=O)C(C)=C3Oc2c(C)cc1	China Approved Name=actinomycin WHO Essential Medicine=dactinomycin Indian Approved Name=dactinomycin FDA Approved Drug=DACTINOMYCIN	-7.4
8995	O=C(N[C@@H](C(=O)N[C@@H](C(=O)N[C@H](C(=O)N[C@H](C(=O)N1[C@@H](C(=O)NCC(=O)N)CCC1)CCCNC(=[N+H2])N)CC(C)C)Cc1cc2c(cc1)cccc2)Cc1ccc(O)cc1)[C@H](NC(=O)[C@H](NC(=O)[C@@H](NC(=O)[C@H]1NC(=O)CC1)Cc1nc[nH]c1)Cc1c2c([nH]c1)cccc2)CO	Indian Approved Name=nafarelin FDA Approved Drug=NAFARELIN ACETATE	-7.4
2658	O(C)c1c2occc2c2OC(c3ccccc3)=CC(=O)c2c1	Traditional Herbal Isolate=kanjone	-7.3
4763	FC(F)(F)c1cc(C2=CC[N+@@H](CCc3cc4c(cc3)cccc4)CC2)ccc1	NPC Approved Name=1-(2-(naphth-2-yl)ethyl)-4-(3-trifluoromethylphenyl)-1 2 5 6-tetrahydropyridine	-7.3
4764	FC(F)(F)c1cc(C2=CC[N+@H](CCc3cc4c(cc3)cccc4)CC2)ccc1	NPC Approved Name=1-(2-(naphth-2-yl)ethyl)-4-(3-trifluoromethylphenyl)-1 2 5 6-tetrahydropyridine	-7.3
5093	Fc1c(N2CC[N+H](C)CC2)cc2N(c3ccc(F)cc3)C=C(C(=O)[O-])C(=O)c2c1	NPC Approved Name=difloxacin	-7.3
5281	C(C)(C)[C@@H]1[C@@]2(C)[C@@H]([C@@]3(C)[C@@](C)([C@@H]4[C@](C)([C@@H]5[C@](C)(C(C)=CCC5)CC4)CC3)CC2)CC1	Traditional Herbal Isolate=filicene	-7.3
5290	C(C)(C)[C@H]1[C@@]2(C)[C@@H]([C@@]3(C)[C@@](C)([C@@H]4[C@](C)([C@H]5[C@](C)(C(C)=CCC5)CC4)CC3)CC2)CC1	Traditional Herbal Isolate=filicene	-7.3
5419	O[C@@H]1C[C@@H]2[C@](C)([C@@H]3[C@@H]([C@H]4[C@](C)([C@@H]5[C@H](C)C6(O[C@H]5C4)OC[C@H](C)CC6)CC3)CC2)CC1	Traditional Herbal Isolate=tigogenin;sarsasapogenin	-7.3
5433	O[C@H]1[C@@]2(C)[C@@H]3[C@@H]([C@@H]4[C@](C)([C@H]5[C@H](C)[C@]6(O[C@@H]5C4)OC[C@@H](C)CC6)CC3)CC[C@H]2CCC1	Traditional Herbal Isolate=spirostanol saponins	-7.3
5450	O=C1c2c([O-])c3c(OC(C)(C)C=C3)cc2OC=2c3c(O[C@@H](/C=C(\C)/C)C1=2)cc(O)cc3	Traditional Herbal Isolate=cyclomulberrochromene	-7.3
5451	O=C1c2c([O-])c3c(OC(C)(C)C=C3)cc2OC=2c3c(O[C@H](/C=C(\C)/C)C1=2)cc(O)cc3	Traditional Herbal Isolate=cyclomulberrochromene	-7.3
5685	O=C1[C@@H]2[C@](C)([C@]3(C)[C@@H]([C@@]4(C)[C@H](C(C)(C)CCC4)CC3)C1)CC[C@@]1(C)[C@@H]2[C@@H](C(C)C)CC1	Traditional Herbal Isolate=clerodone	-7.3
5692	O[C@@H]1C(C)(C)[C@H]2[C@](C)(C=3[C@H]([C@@]4(C)[C@](C)([C@H]5[C@](C)([C@@H](C(C)C)CC5)CC4)CC=3)CC2)CC1	Traditional Herbal Isolate=fernenol	-7.3
5776	O=C1[C@@]2(C)[C@H]3[C@@H](C)[C@]4(O[C@H]3C[C@@H]2[C@@H]2[C@@H]([C@]3(C)[C@@H](C[C@@H](O)CC3)CC2)C1)OC[C@H](C)CC4	Traditional Herbal Isolate=hecogenin	-7.3
5882	Fc1c(C2=N[C@H](NC(=O)c3[nH]c4c(c3)cccc4)C(=O)N3c4c2cccc4CC3)cccc1	NPC Approved Name=pranazepide	-7.3
5911	O(C[C@@]1(C)Oc2c(C)c(C)c(O)c(C)c2CC1)c1ccc(C[C@H]2C(=O)[N-]C(=O)S2)cc1	FDA Approved Drug=TROGLITAZONE	-7.3
6018	Fc1ccc(CNC(=O)C2=C([O-])C(=O)N(C)C(C(NC(=O)c3oc(C)nn3)(C)C)=N2)cc1	FDA Approved Drug=RALTEGRAVIR POTASSIUM	-7.3
6021	O=C([O-])[C@@H]1[C@H](O)[C@@H](O)[C@H](O)[C@H](Oc2c(O)c([O-])c3C(=O)C=C(c4ccccc4)Oc3c2)O1	Traditional Herbal Isolate=baicalin	-7.3
6026	S(=O)([O-])(=NC(=O)NC1CCCCC1)c1ccc(CCNC(=O)c2ncc(C)nc2)cc1	China Approved Name=glipizide Indian Approved Name=glipizide FDA Approved Drug=GLIPIZIDE	-7.3
6103	Clc1cc2[C@H](O)CCCN(C(=O)c3c(C)cc(NC(=O)c4c(C)cccc4)cc3)c2cc1	FDA Approved Drug=TOLVAPTAN	-7.3
6147	O=C([O-])[C@@H](CC/C=C(\C)/C)[C@@H]1[C@]2(C)[C@](C)(C3=C([C@@]4(C)[C@H](C(C)(C)C(=O)CC4)CC3)CC2)CC1	Traditional Herbal Isolate=pinicolic acid	-7.3
6149	O=C([O-])[C@@H]1[C@@H](C)[C@@H]2[C@@](C)(CC1)CC[C@]1(C)[C@]3(C)[C@@H]([C@@]4(C)[C@@H](C(C)(C)C(=O)CC4)CC3)CC=C21	Traditional Herbal Isolate=ifflaionic acid	-7.3
6260	Fc1ccc(Cn2c(NC3CC[N+H](CCc4ccc(OC)cc4)CC3)nc3c2cccc3)cc1	Indian Approved Name=astemizole	-7.3
6333	O=C1C(C)=C2[C@@]([C@@]34OC(=O)C(C)=C3C[C@H]3C(=C)CCC[C@]3(C)C4)(O1)C[C@]1(C)[C@H](C(=C)CCC1)C2	Traditional Herbal Isolate=biatractylolide	-7.3
6336	O=C1C(C)=C2[C@@]([C@]34OC(=O)C(C)=C3C[C@H]3C(=C)CCC[C@]3(C)C4)(O1)C[C@@]1(C)[C@H](C(=C)CCC1)C2	Traditional Herbal Isolate=biatractylolide	-7.3
6340	O=C1C(C)=C2[C@@]([C@]34OC(=O)C(C)=C3C[C@@H]3C(=C)CCC[C@]3(C)C4)(O1)C[C@@]1(C)[C@H](C(=C)CCC1)C2	Traditional Herbal Isolate=biatractylolide	-7.3
6587	Clc1cc2N(CCC[N+H]3CCC4(C(=O)N[C@@H]5[N+H]4CCCC5)CC3)c3c(cccc3)CCc2cc1	NPC Approved Name=mosapramine	-7.3
6634	O=C1C(C)=C(C)C[C@@H]([C@@]2(C)O[C@@H](O)C34O[C@](O)([C@H]5[C@H]([C@]6(C)C(=O)CC=CC6=CC5)CC3)CCC24)O1	Traditional Herbal Isolate=withaphysalin	-7.3
6702	O=C1[C@H]2C(C)(C)[C@H](O)[C@H](O)C[C@]2(C)[C@H]2C(=C1)C[C@]1(C)[C@H]([C@@]3(C)[C@H]([C@](CO)(C)[C@@H](O)CC3)CC1)CC2	Traditional Herbal Isolate=lycoclavanin	-7.3
6761	O=C(Nc1cc(Nc2nc(-c3cnccc3)ccn2)c(C)cc1)c1ccc(CN2CC[N+H](C)CC2)cc1	Indian Approved Name=imatinib mesylate Australia Approved Name=IMATINIB FDA Approved Drug=IMATINIB MESYLATE	-7.3
6769	O=C(O[C@H]1[C@@H]2Oc3c(OC(=O)c4cnccc4)ccc4c3[C@@]32[C@H]([C@@H]([N+@@H](C)CC3)C4)C=C1)c1cnccc1	US Illegal/Scheduled Drug (Schedule 1)=Nicomorphine	-7.3
6786	O=C(O[C@@H]1C(C)(C)[C@H]2[C@](C)([C@H]3[C@](C)([C@]4(C)C([C@@H]5[C@@](C(=O)[O-])(CC4)CCC(C)(C)C5)=CC3)CC2)CC1)C	Traditional Herbal Isolate=acetyl oleanolic acid	-7.3
6953	O(C)[C@H]1[C@@H](O)[C@@H](C)O[C@H](O[C@@H]2C[C@@H]3[C@@](C)([C@@H]4[C@@H]([C@@]5(O)[C@](C)([C@H](C6=CC(=O)OC6)CC5)CC4)CC3)CC2)C1	Traditional Herbal Isolate=somalin	-7.3
6968	O(C)[C@@H]1[C@@H](O)[C@@H](C)O[C@@H](O[C@H]2C[C@H]3[C@](C)([C@H]4[C@H]([C@@]5(O)[C@@](C)([C@@H](C6=CC(=O)OC6)CC5)CC4)CC3)CC2)C1	Traditional Herbal Isolate=somalin	-7.3
6977	O([C@@H]1[C@@H](O)[C@H](O)[C@@H](O)[C@H](C)O1)[C@@H]1C[C@H]2[C@@](C)([C@@H]3[C@@H]([C@]4(O)[C@](C)([C@H](C5=CC(=O)OC5)CC4)CC3)CC2)CC1	Traditional Herbal Isolate=evomonoside	-7.3
6980	O([C@@H]1[C@H](O)[C@@H](O)[C@@H](O)[C@H](C)O1)[C@@H]1C[C@H]2[C@@](C)([C@@H]3[C@H]([C@]4(O)[C@](C)([C@H](C5=CC(=O)OC5)CC4)CC3)CC2)CC1	Traditional Herbal Isolate=evomonoside	-7.3
6987	O([C@@H]1[C@H](O)[C@H](O)[C@@H](O)[C@@H](C)O1)[C@@H]1C[C@H]2[C@@](C)([C@H]3[C@H]([C@]4(O)[C@](C)([C@H](C5=CC(=O)OC5)CC4)CC3)CC2)CC1	Traditional Herbal Isolate=evomonoside	-7.3
7013	O=C1C2(O)C34[C@@](C)(O1)[C@@H]1OC(=O)[C@@H]5[C@](C)([C@H]3C(=O)C(O4)(OC5)[C@@H]3[C@H]([C@]4(C)C(=O)C=CCC54OC5C3)CC2)C1	Traditional Herbal Isolate=physalin b	-7.3
7062	O=C(O[C@H]1[C@@H](O)[C@@H]2C(C(=O)OC)=CO[C@@H](O[C@H]3[C@H](O)[C@H](O)[C@@H](O)[C@H](CO)C3)[C@H]2[C@H]1C)/C=C/c1ccccc1	Traditional Herbal Isolate=iridoid glucosides	-7.3
7071	O=C(O[C@H]1[C@@H](O)[C@@H]2C(C(=O)OC)=CO[C@@H](O[C@H]3[C@@H](O)[C@H](O)[C@@H](O)[C@H](CO)C3)[C@H]2[C@H]1C)/C=C/c1ccccc1	Traditional Herbal Isolate=iridoid glucosides	-7.3
7119	O([C@H]1[C@H](O)[C@@H](O)[C@@H](O)[C@H](C)O1)[C@@H]1C[C@]2(O)[C@@](C)([C@H]3[C@H]([C@]4(O)[C@@](C)([C@H](C5=CC(=O)OC5)CC4)CC3)CC2)CC1	Traditional Herbal Isolate=peripalloside	-7.3
7127	S(=O)(=O)(C)N1C(=O)N(C(=O)N[C@H](C(=O)N[C@H]2C(=O)N3[C@@H](C(=O)[O-])C(C)(C)S[C@H]23)c2ccccc2)CC1	China Approved Name=mezlocillin	-7.3
7236	O=C[C@]12[C@@](O)(C[C@@H](O[C@H]3[C@@H](O)[C@H](O)[C@@H](O)[C@@H](C)O3)CC1)CC[C@H]1[C@]3(O)[C@@](C)([C@H](C4=CC(=O)OC4)CC3)CC[C@@H]21	Traditional Herbal Isolate=strophalloside	-7.3
7239	O(C)c1ccc(C=2Oc3c(c(O)cc([O-])c3C(=O)C=2)-c2c(O)ccc([C@H]3Oc4c(c([O-])cc(O)c4)C(=O)C3)c2)cc1	Traditional Herbal Isolate=methyl amentoflavone	-7.3
7261	O([C@H]1[C@H](O)[C@H](O)[C@@H](O)[C@H](C)O1)[C@@H]1C[C@]2(O)[C@@](C)([C@@H]3[C@H]([C@]4(O)[C@@](C)([C@H](O)C3)[C@H](C3=CC(=O)OC3)CC4)CC2)CC1	Traditional Herbal Isolate=alpha-antioside	-7.3
7265	O([C@@H]1[C@@H](O)[C@H](O)[C@@H](O)[C@@H](C)O1)[C@@H]1C[C@]2(O)[C@@](C)([C@H]3[C@H]([C@]4(O)[C@@](C)([C@H](O)C3)[C@H](C3=CC(=O)OC3)CC4)CC2)CC1	Traditional Herbal Isolate=alpha-antioside	-7.3
7387	O[C@H]1C2Oc3c(O)c(-c4c(O)c5OC6[C@@H](O)C=C[C@H]7[C@@H]8[N+@@H](C)CCC67c5c(c4)C8)cc4c3C32[C@H]([C@@H]([N+@H](C)CC3)C4)C=C1	Traditional Herbal Isolate=pseudomorphine	-7.3
7390	O[C@@H]1C2Oc3c(O)c(-c4c(O)c5OC6[C@@H](O)C=C[C@H]7[C@H]8[N+@H](C)CCC67c5c(c4)C8)cc4c3C32[C@@H]([C@H]([N+@H](C)CC3)C4)C=C1	Traditional Herbal Isolate=pseudomorphine	-7.3
7396	O[C@H]1C2Oc3c(O)c(-c4c(O)c5OC6[C@H](O)C=C[C@H]7[C@@H]8[N+@H](C)CCC67c5c(c4)C8)cc4c3C32[C@@H]([C@@H]([N+@H](C)CC3)C4)C=C1	Traditional Herbal Isolate=pseudomorphine	-7.3
7400	O[C@H]1C2Oc3c(O)c(-c4c(O)c5OC6[C@@H](O)C=C[C@H]7[C@@H]8[N+@H](C)CCC67c5c(c4)C8)cc4c3C32[C@@H]([C@@H]([N+@H](C)CC3)C4)C=C1	Traditional Herbal Isolate=pseudomorphine	-7.3
7401	O[C@H]1C2Oc3c(O)c(-c4c(O)c5OC6[C@H](O)C=C[C@@H]7[C@@H]8[N+@@H](C)CCC67c5c(c4)C8)cc4c3C32[C@@H]([C@@H]([N+@@H](C)CC3)C4)C=C1	Traditional Herbal Isolate=pseudomorphine	-7.3
7458	O=C(N[C@@]1(C(C)C)C(=O)N2[C@H](CC(C)C)C(=O)N3[C@H]([C@@]2(O)O1)CCC3)[C@H]1C[N+@@H](C)[C@@H]2[C@@H](c3c4c([nH]cc4C2)ccc3)C1	NPC Approved Name=dihydro-alpha-ergocryptine	-7.3
7495	O=[N+]([O-])c1cc([C@@H]2C(C(=O)OC3C[N+H](C(c4ccccc4)c4ccccc4)C3)=C([N+H3])NC(C)=C2C(=O)OC(C)C)ccc1	NPC Approved Name=azelnidipine	-7.3
7507	O[C@H]1C=C(C)[C@@H](/C=C/C(=C\C=C\C(=C/C=C/C=C(\C=C\C=C(\C)/[C@H]2O[C@@]3(C)C(C(C)(C)C[C@@H](O)C3)=C2)/C)\C)/C)C(C)(C)C1	Traditional Herbal Isolate=chrysanthemaxanthin	-7.3
7508	O[C@@H]1C=C(C)[C@H](/C=C/C(=C\C=C\C(=C/C=C/C=C(\C=C\C=C(\C)/[C@H]2O[C@@]3(C)C(C(C)(C)C[C@@H](O)C3)=C2)/C)\C)/C)C(C)(C)C1	Traditional Herbal Isolate=chrysanthemaxanthin	-7.3
7512	O[C@@H]1C=C(C)[C@@H](/C=C/C(=C\C=C\C(=C/C=C/C=C(\C=C\C=C(\C)/[C@H]2O[C@@]3(C)C(C(C)(C)C[C@H](O)C3)=C2)/C)\C)/C)C(C)(C)C1	Traditional Herbal Isolate=chrysanthemaxanthin	-7.3
7538	O=C(/C=C/C(=C\C=C\C(=C/C=C/C=C(\C=C\C=C(/C=C/C=1C(C)(C)C[C@H](O)CC=1C)\C)/C)\C)/C)[C@@]1(C)C(C)(C)C[C@H](O)C1	Indian Approved Name=capsicum oleoresin;oleoresin capsicum	-7.3
7571	O([C@H]1[C@H](O)[C@H](Oc2c(OC)c([O-])c3C(=O)C=C(c4ccccc4)Oc3c2)O[C@H](C)[C@H]1O)[C@H]1[C@H](O)[C@H](O)[C@H](O)[C@H](CO)O1	Traditional Herbal Isolate=7-methoxy-baicalein	-7.3
7605	O(C[C@H]1[C@@H](O)[C@@H](O)[C@H](O)[C@H](OC2=C(c3ccc(O)cc3)Oc3c(c([O-])cc(O)c3)C2=O)O1)[C@H]1[C@H](O)[C@@H](O)[C@H](O)[C@H](C)O1	Traditional Herbal Isolate=kaempferol-3-robinobioside	-7.3
7612	O([C@H]1[C@@H](O)[C@H](O)[C@H](O)[C@H](CO)O1)c1c([C@H]2[C@H](O)[C@@H](O)[C@H](O)[C@H](CO)O2)c([O-])c2C(=O)C=C(c3ccc(O)cc3)Oc2c1	Traditional Herbal Isolate=saponarin	-7.3
7678	Clc1c(OC)cc2cc1N(C)C(=O)C[C@H](OC(=O)C)[C@@]1(C)O[C@H]1[C@H](C)C1OC(=O)NC(O)([C@@H](OC)/C=C/C=C(/C)\C2)C1	Traditional Herbal Isolate=maytanacine	-7.3
7768	S(CC1=C(C(=O)[O-])N2C(=O)[C@H](NC(=O)[C@H](NC(=O)c3c(O)cc(C)nc3)c3ccc(O)cc3)[C@H]2SC1)c1n(C)nnn1	FDA Approved Drug=CEFPIRAMIDE SODIUM	-7.3
7769	O=[N+]([O-])c1cc([C@@H]2C(C(=O)OCCN3CC[N+H](C(c4ccccc4)c4ccccc4)CC3)=C(C)NC(C)=C2C(=O)OC)ccc1	NPC Approved Name=manidipine	-7.3
7814	O(C)c1c(Oc2c(O)ccc(C[C@@H]3[N+@@H](C)CCc4c3cc(O)c(OC)c4)c2)cc2[C@@H](Cc3ccc(OC)cc3)[N+@@H](C)CCc2c1	Traditional Herbal Isolate=iso-liensinine	-7.3
7833	O=C(O[C@@H]1C(C)(C)[C@@H]2[C@](C)([C@H]3[C@](C)([C@@]4(C)C([C@H]5[C@@H](C)[C@@H](CO)CC[C@]5(C(=O)[O-])CC4)=CC3)CC2)CC1)/C=C/c1ccc(O)cc1	Traditional Herbal Isolate=rubicoumaric acid	-7.3
7848	O=C([O-])[C@H]1[C@H](O)[C@@H](O)[C@@H](O)[C@H](Oc2cc([O-])c3C(=O)C=C(c4ccc(O[C@H]5[C@H](O)[C@@H](O)[C@@H](O)[C@@H](C(=O)[O-])O5)cc4)Oc3c2)O1	Traditional Herbal Isolate=apigenin-7-diglucuronide	-7.3
7850	O=C([O-])[C@H]1[C@H](O)[C@H](O)[C@H](O)[C@H](Oc2cc([O-])c3C(=O)C=C(c4ccc(O[C@H]5[C@@H](O)[C@@H](O)[C@@H](O)[C@@H](C(=O)[O-])O5)cc4)Oc3c2)O1	Traditional Herbal Isolate=apigenin-7-diglucuronide	-7.3
7851	O=C([O-])[C@H]1[C@H](O)[C@@H](O)[C@H](O)[C@H](Oc2cc([O-])c3C(=O)C=C(c4ccc(O[C@H]5[C@H](O)[C@H](O)[C@@H](O)[C@H](C(=O)[O-])O5)cc4)Oc3c2)O1	Traditional Herbal Isolate=apigenin-7-diglucuronide	-7.3
7852	O=C([O-])[C@H]1[C@H](O)[C@H](O)[C@@H](O)[C@H](Oc2cc([O-])c3C(=O)C=C(c4ccc(O[C@H]5[C@H](O)[C@H](O)[C@@H](O)[C@H](C(=O)[O-])O5)cc4)Oc3c2)O1	Traditional Herbal Isolate=apigenin-7-diglucuronide	-7.3
7857	O=C([O-])[C@H]1[C@H](O)[C@@H](O)[C@H](O)[C@H](Oc2cc([O-])c3C(=O)C=C(c4ccc(O[C@H]5[C@H](O)[C@@H](O)[C@@H](O)[C@H](C(=O)[O-])O5)cc4)Oc3c2)O1	Traditional Herbal Isolate=apigenin-7-diglucuronide	-7.3
7897	O=[N+]([O-])c1cc([C@@H]2C(C(=O)OCCN(Cc3ccccc3)c3ccccc3)=C(C)NC(C)=C2P2(=O)OCC(C)(C)CO2)ccc1	NPC Approved Name=efonidipine	-7.3
7917	O([C@H]1[C@H](C)O[C@H](O[C@@H]2C[C@H]3[C@@](C)([C@H]4[C@H]([C@]5(O)[C@](C)([C@H](C6=CC(=O)OC6)CC5)CC4)CC3)CC2)C[C@H]1O)[C@@H]1O[C@@H](C)[C@H](O)[C@H](O)C1	Traditional Herbal Isolate=8-beta-hydroxy-digitoxigenin	-7.3
8032	O=C[C@]12[C@@](O)(C[C@@H](O[C@@H]3O[C@@H](C)[C@H](O[C@H]4[C@@H](O)[C@H](O)[C@@H](O)CO4)[C@H](O)C3)CC1)CC[C@H]1[C@]3(O)[C@@](C)([C@H](C4=CC(=O)OC4)CC3)CC[C@H]21	Traditional Herbal Isolate=erychroside	-7.3
8068	O=C(N[C@@H]([C@H](O)C[N+@H]1[C@H](C(=O)NC(C)(C)C)C[C@@H]2[C@@H](C1)CCCC2)Cc1ccccc1)[C@@H](NC(=O)c1nc2c(cc1)cccc2)CC(=O)N	WHO Essential Medicine=saquinavir FDA Approved Drug=SAQUINAVIR;SAQUINAVIR MESYLATE	-7.3
8134	O(C[C@@H]1[C@H](O)[C@H](O)[C@H](O)[C@H](O[C@@H]2C[C@]3(O)[C@@](CO)([C@H]4[C@H]([C@]5(O)[C@@](C)([C@H](C6=CC(=O)OC6)CC5)CC4)CC3)CC2)O1)[C@@H]1[C@@H](C)O[C@H](O)C[C@H]1O	Traditional Herbal Isolate=erysimosol	-7.3
8163	FC(F)(F)C(=O)N[C@H]1[C@@H](O)[C@@H](C)O[C@H](O[C@@H]2c3c([O-])c4C(=O)c5c(OC)cccc5C(=O)c4c([O-])c3C[C@@](O)(C(=O)COC(=O)CCCC)C2)C1	FDA Approved Drug=VALRUBICIN	-7.3
8177	O=C([O-])[C@@H]1[C@H](O)[C@@H](O)[C@@H](O)[C@H](O[C@H]2[C@H](O)[C@H](O)[C@H](CO)O[C@H]2Oc2c(O)cc3/[N+](=C\C=C\4/C=C(C(=O)[O-])[N+H2][C@H](C(=O)[O-])C/4)/[C@@H](C(=O)[O-])Cc3c2)O1	Traditional Herbal Isolate=iso-amaranthin	-7.3
8178	O=C([O-])[C@@H]1[C@H](O)[C@@H](O)[C@H](O)[C@H](O[C@H]2[C@H](O)[C@H](O)[C@H](CO)O[C@H]2Oc2c(O)cc3/[N+](=C\C=C\4/C=C(C(=O)[O-])[N+H2][C@H](C(=O)[O-])C/4)/[C@@H](C(=O)[O-])Cc3c2)O1	Traditional Herbal Isolate=iso-amaranthin	-7.3
8179	O=C([O-])[C@@H]1[C@@H](O)[C@@H](O)[C@@H](O)[C@H](O[C@H]2[C@H](O)[C@@H](O)[C@H](CO)O[C@H]2Oc2c(O)cc3/[N+](=C\C=C\4/C=C(C(=O)[O-])[N+H2][C@@H](C(=O)[O-])C/4)/[C@@H](C(=O)[O-])Cc3c2)O1	Traditional Herbal Isolate=iso-amaranthin	-7.3
8330	O=C([O-])[C@]12[C@@H](C=3[C@](C)([C@@]4(C)[C@@H]([C@]5(C)[C@H](C(C)(C)[C@@H](O[C@@H]6[C@@H](O[C@H]7[C@@H](O)[C@H](O)[C@H](O)[C@H](CO)O7)[C@H](O)[C@H](O)[C@H](CO)O6)CC5)CC4)CC=3)CC1)CC(C)(C)CC2	Traditional Herbal Isolate=dianthronic heteroside	-7.3
8409	O=CO[C@H]1[C@H]([C@]2(C)[C@](O)([C@H]3[C@H]([C@]4(C)[C@@H](C[C@@H](O[C@@H]5O[C@@H](C)[C@H](O[C@@H]6O[C@H](C)[C@H](O[C@@H]7O[C@H](C)[C@H](O)[C@H](O)C7)[C@@H](O)C6)[C@@H](O)C5)CC4)CC3)CC2)C1)C1=CC(=O)OC1	Traditional Herbal Isolate=gitaloxin	-7.3
8414	O=CO[C@H]1[C@H]([C@]2(C)[C@](O)([C@H]3[C@@H]([C@@]4(C)[C@@H](C[C@H](O[C@H]5O[C@H](C)[C@H](O[C@@H]6O[C@@H](C)[C@@H](O[C@H]7O[C@H](C)[C@@H](O)[C@@H](O)C7)[C@H](O)C6)[C@@H](O)C5)CC4)CC3)CC2)C1)C1=CC(=O)OC1	Traditional Herbal Isolate=gitaloxin	-7.3
8451	O=C([O-])C[C@H]1C(=O)N[C@H](Cc2c3c([nH]c2)cccc3)C(=O)N2[C@@H](C(=O)N[C@@H](C(=O)N)CSSCCC(=O)N[C@@H](CCCCNC(=[N+H2])N)C(=O)NCC(=O)N1)CCC2	Indian Approved Name=eptifibatide	-7.3
8457	O(C)[C@H]1[C@H](O)[C@@H](O[C@@H]2[C@@H](C)O[C@H](O[C@H]3[C@H](C)O[C@H](O[C@@H]4C[C@@H]5[C@@](C)([C@H]6[C@](O)([C@@]7(O)[C@](C)([C@H](O)C6)[C@@](O)([C@@H](O)C)CC7)CC5)CC4)C[C@H]3OC)C[C@@H]2OC)O[C@@H](C)[C@H]1O	Traditional Herbal Isolate=tenacissoside a	-7.3
8557	O=C([O-])[C@@]12[C@@H](C=3[C@](C)([C@]4(C)[C@H]([C@]5(C)[C@H](C(C)(C)[C@H](O[C@@H]6[C@H](O[C@@H]7[C@@H](O[C@H]8[C@@H](O)[C@@H](O)[C@H](O)[C@H](C)O8)[C@@H](O)[C@@H](O)[C@@H](CO)O7)[C@H](O)[C@@H](O)CO6)CC5)CC4)CC=3)CC1)CC(C)(C)CC2	Traditional Herbal Isolate=raddeanin a	-7.3
8562	O=C([O-])[C@]12[C@H](C=3[C@@](C)([C@]4(C)[C@@H]([C@@]5(C)[C@H](C(C)(C)[C@H](O[C@H]6[C@@H](O[C@@H]7[C@H](O[C@H]8[C@@H](O)[C@H](O)[C@@H](O)[C@@H](C)O8)[C@H](O)[C@H](O)[C@@H](CO)O7)[C@H](O)[C@H](O)CO6)CC5)CC4)CC=3)CC1)CC(C)(C)CC2	Traditional Herbal Isolate=raddeanin a	-7.3
8571	O=C([O-])[C@]12[C@@H](C=3[C@](C)([C@@]4(C)[C@@H]([C@@]5(C)[C@H]([C@](CO)(C)[C@@H](O[C@H]6[C@H](O[C@@H]7[C@@H](O)[C@@H](O)[C@@H](O[C@H]8[C@H](O)[C@H](O)[C@H](O)[C@@H](C)O8)[C@H](CO)O7)[C@H](O)[C@H](O)CO6)CC5)CC4)CC=3)CC1)CC(C)(C)CC2	Traditional Herbal Isolate=chikusetsa saponin iv	-7.3
8688	O=C(NCC(=O)N)[C@@H](NC(=O)[C@@H]1N(C(=O)[C@H]2NC(=O)[C@H](CC(=O)N)NC(=O)[C@H]([C@@H](O)C)NC(=O)[C@@H]([C@@H](CC)C)NC(=O)[C@H](Cc3ccc(O)cc3)NC(=O)[C@@H]([N+H3])CSSC2)CCC1)CC(C)C	Indian Approved Name=urofollitrophin FDA Approved Drug=UROFOLLITROPIN	-7.3
8741	O([C@H]1[C@@H](O)[C@H](O)[C@H](O[C@@H]2CC=3[C@](C)([C@@H]4[C@@H]([C@@]5(O)[C@](C)([C@H]6[C@@H](C)C7(O[C@@H]6C5)OC[C@@H](C)CC7)CC4)CC=3)CC2)O[C@@H]1CO)[C@@H]1[C@H](O[C@@H]2[C@@H](O)[C@H](O)[C@@H](O)[C@@H](CO)O2)[C@@H](O[C@H]2[C@H](O)[C@@H](O)[C@@H](O)CO2)[C@H](O)[C@H](CO)O1	Traditional Herbal Isolate=steroidal saponin pod-ii	-7.3
8755	O([C@@H]1[C@H](O)[C@@H](O)[C@@H](O[C@H]2CC=3[C@@](C)([C@H]4[C@H]([C@]5(O)[C@@](C)([C@H]6[C@H](C)C7(O[C@@H]6C5)OC[C@@H](C)CC7)CC4)CC=3)CC2)O[C@@H]1CO)[C@@H]1[C@H](O[C@H]2[C@@H](O)[C@@H](O)[C@H](O)[C@H](CO)O2)[C@@H](O[C@@H]2[C@H](O)[C@@H](O)[C@H](O)CO2)[C@@H](O)[C@@H](CO)O1	Traditional Herbal Isolate=steroidal saponin pod-ii	-7.3
8780	O=C1Oc2c3c(O)cc4C(=O)Oc5c(O)c(O)c(-c6c(O)c(O)c(O)cc6C(=O)O[C@H]6[C@@H]7OC(=O)c8c(c(O)c(O)c(O)c8)-c8c(O)c(O)c(O)cc8C(=O)O[C@@H]7[C@@H](O)O[C@H]6COC(=O)c6c(c(O)c(O)c(O)c6)O3)c1c5-c24	Traditional Herbal Isolate=terchebulin	-7.3
8836	O=C(N[C@H]1C(=O)N[C@H]([C@H](O)C)C(=O)N2[C@H](C(=O)N[C@H]([C@H](O)[C@H](O)c3ccc(O)cc3)C(=O)N[C@H]([C@H](O)C)C(=O)N3[C@@H]([C@@H](O)[C@H](C)C3)C(=O)N[C@H](O)[C@H](O)C1)C[C@@H](O)C2)c1ccc(-c2ccc(-c3ccc(OCCCCC)cc3)cc2)cc1	Indian Approved Name=anidulafungin FDA Approved Drug=ANIDULAFUNGIN	-7.3
8897	O(C[C@H](CC[C@@]1(O)[C@@H](C)[C@H]2[C@]3(C)[C@@H]([C@@H]4[C@H]([C@]5(C)C(=CC4)C[C@H](O[C@@H]4[C@@H](O[C@H]6[C@@H](O)[C@@H](O)[C@@H](O)[C@@H](C)O6)[C@@H](O)[C@@H](O[C@@H]6[C@@H](O)[C@H](O)[C@H](O[C@H]7[C@H](O)[C@H](O)[C@H](O)[C@@H](C)O7)[C@@H](C)O6)[C@H](CO)O4)CC5)CC3)C[C@H]2O1)C)[C@H]1[C@@H](O)[C@H](O)[C@H](O)[C@H](CO)O1	Traditional Herbal Isolate=asperoside;proto-isoerubosides	-7.3
8904	O(C[C@H]1[C@@H](O)[C@@H](O)[C@H](O[C@H]2[C@@H](O)[C@H](O)[C@@H](O)CO2)[C@H](O[C@H]2[C@@H](O[C@H]3[C@H](O)[C@H](O)[C@H](O)[C@@H](C)O3)[C@H](O[C@@H]3C(C)(C)[C@@H]4[C@@](C)([C@H]5[C@](C)(C67[C@@H]([C@H]8[C@@](O)(C)C[C@H](/C=C(\C)/C)O[C@]8(OC6)C7)CC5)CC4)CC3)OC[C@H]2O)O1)[C@H]1[C@@H](O)[C@H](O)[C@H](O)[C@H](CO)O1	Traditional Herbal Isolate=jujuboside a	-7.3
8938	O=C(N[C@@H]1[C@H](C)OC(=O)[C@@H](C(C)C)N(C)C(=O)CN(C)C(=O)[C@H]2N(C(=O)[C@@H](C(C)C)NC1=O)CCC2)c1c2N=C3C(C(=O)N[C@H]4[C@@H](C)OC(=O)[C@H](C(C)C)N(C)C(=O)CN(C)C(=O)[C@@H]5N(C(=O)[C@@H](C(C)C)NC4=O)CCC5)=C(N)C(=O)C(C)=C3Oc2c(C)cc1	China Approved Name=actinomycin WHO Essential Medicine=dactinomycin Indian Approved Name=dactinomycin FDA Approved Drug=DACTINOMYCIN	-7.3
8941	O=C(N[C@@H]1[C@@H](C)OC(=O)[C@@H](C(C)C)N(C)C(=O)CN(C)C(=O)[C@H]2N(C(=O)[C@@H](C(C)C)NC1=O)CCC2)c1c2N=C3C(C(=O)N[C@@H]4[C@@H](C)OC(=O)[C@@H](C(C)C)N(C)C(=O)CN(C)C(=O)[C@@H]5N(C(=O)[C@H](C(C)C)NC4=O)CCC5)=C(N)C(=O)C(C)=C3Oc2c(C)cc1	China Approved Name=actinomycin WHO Essential Medicine=dactinomycin Indian Approved Name=dactinomycin FDA Approved Drug=DACTINOMYCIN	-7.3
1013	P(=O)(OCC(=O)[C@@]1(O)[C@H](C)C[C@@H]2[C@@]1(C)C[C@@H](O)[C@@]1(F)[C@@]3(C)C(=CC(=O)C=C3)CC[C@H]21)([O-])[O-]	FDA Approved Drug=DEXMEDETOMIDINE HYDROCHLORIDE	-7.2
3402	Oc1c([C@H]2COc3c4c(OC(C)(C)C=C4)ccc3C2)ccc(O)c1	Indian Approved Name=glabridin	-7.2
3662	O[C@@]1(C#C)[C@@]2(C)[C@@H]([C@H]3[C@@H]([C@]4(C)C(=Cc5oncc5C4)CC3)CC2)CC1	China Approved Name=danazol Indian Approved Name=danazol FDA Approved Drug=DANAZOL	-7.2
4061	O=C(C[N+H]1CCN(C)CC1)N1c2ncccc2NC(=O)c2c1cccc2	NPC Approved Name=pirenzepine	-7.2
4118	O[C@H]1[C@H]2[C@@H]([N+@H](C)Cc3c4OCOc4ccc23)c2c(cc3OCOc3c2)C1	Traditional Herbal Isolate=chelidonine	-7.2
4248	O=C(O[C@H]1[C@@H](O)[C@H]2C(=C)C(=O)O[C@@H]2[C@H]2C(C)=CC(=O)[C@H]2[C@@H]1C)/C(=C\C)/C	Indian Approved Name=azardirachta indica	-7.2
4439	O=C1O[C@]2([C@]3(C)[C@H]([C@@H]4[C@H]([C@]5(C)C([C@H]6[C@H]4C6)=CC(=O)CC5)CC3)[C@H]3[C@H]2C3)CC1	Indian Approved Name=drospirenone FDA Approved Drug=DROSPIRENONE	-7.2
4471	O[C@H]1[C@]2(C)[C@H]([N+@@H](C)Cc3c4OCOc4ccc23)c2c(cc3OCOc3c2)C1	Traditional Herbal Isolate=corynoline	-7.2
4472	O[C@H]1[C@]2(C)[C@H]([N+@H](C)Cc3c4OCOc4ccc23)c2c(cc3OCOc3c2)C1	Traditional Herbal Isolate=corynoline	-7.2
4555	O[C@H]1O[C@H]2[C@H]([N+@@H](C)CCc3c2cc2OCOc2c3)c2c1c1OCOc1cc2	Traditional Herbal Isolate=rhoeagenine	-7.2
4736	O=C1N2[C@@H]3[C@H]4[C@@]5(O)C(=CCO[C@@H]4C1)C[N+@H](C)CCC3(C(=O)C5)c1c2cccc1	Traditional Herbal Isolate=icajine	-7.2
5142	O([C@H]1[C@@H](O)[C@H](O)[C@H](O)[C@H](CO)O1)c1c([O-])c2C(=O)c3c(C(=O)c2cc1)cccc3	Traditional Herbal Isolate=beta-d-glucosyloxy	-7.2
5208	Fc1ccc(C(N2CC[N+H](C/C=C/c3ccccc3)CC2)c2ccc(F)cc2)cc1	China Approved Name=flunarizine Indian Approved Name=flunarizine	-7.2
5323	O=C(C)[C@@H]1[C@H]2[C@@](C)([C@H]3[C@@](C)([C@]4(C)[C@H]([C@]5(C)[C@@H](C(C)(C)CCC5)CC4)CC3)CC2)CC1	Traditional Herbal Isolate=adiantone	-7.2
5334	O=C(C)[C@@H]1[C@H]2[C@@](C)([C@H]3[C@@](C)([C@]4(C)[C@@H]([C@]5(C)[C@H](C(C)(C)CCC5)CC4)CC3)CC2)CC1	Traditional Herbal Isolate=adiantone	-7.2
5337	O=C(C)[C@@H]1[C@H]2[C@@](C)([C@@H]3[C@@](C)([C@]4(C)[C@@H]([C@]5(C)[C@H](C(C)(C)CCC5)CC4)CC3)CC2)CC1	Traditional Herbal Isolate=adiantone	-7.2
5372	O=C(OCC(=O)[C@@H]1[C@@]2(C)[C@@H]([C@@H]3[C@H]([C@@]4(C)C(=CC(=O)CC4)CC3)CC2)CC1)C(C)(C)C	FDA Approved Drug=DESOXYCORTICOSTERONE PIVALATE	-7.2
5401	Fc1c(N2c3nc(N4C[C@H]5C([N+H3])[C@@H]5C4)c(F)cc3C(=O)C(C(=O)[O-])=C2)ccc(F)c1	FDA Approved Drug=TROVAFLOXACIN MESYLATE NPC Approved Name=trovafloxacin	-7.2
5420	O[C@H]1C[C@@H]2[C@@](C)([C@H]3[C@@H]([C@H]4[C@@](C)([C@H]5[C@H](C)C6(O[C@@H]5C4)OC[C@H](C)CC6)CC3)CC2)CC1	Traditional Herbal Isolate=tigogenin;sarsasapogenin	-7.2
5611	O=CC=1[C@]2(C)[C@@H]([C@]3(C)[C@H]([C@@]4(C)[C@@](C)([C@H]5[C@@](C)([C@H](C(C)C)CC5)CC4)CC3)CC2)CCC=1	Traditional Herbal Isolate=filicenal	-7.2
5616	O=CC=1[C@]2(C)[C@H]([C@]3(C)[C@H]([C@@]4(C)[C@@](C)([C@@H]5[C@@](C)([C@H](C(C)C)CC5)CC4)CC3)CC2)CCC=1	Traditional Herbal Isolate=filicenal	-7.2
5623	O=C1C(C)(C)[C@@H]2[C@@](C)(C=3[C@@H]([C@]4(C)[C@](C)([C@@H]5[C@](C)([C@H](C(C)C)CC5)CC4)CC=3)CC2)CC1	Traditional Herbal Isolate=arborinone	-7.2
5635	O=C1C(C)(C)[C@@H]2[C@@](C)([C@@H]3[C@@](C)([C@]4(C)C([C@@H]5[C@H](C)[C@H](C)CC[C@]5(C)CC4)=CC3)CC2)CC1	Traditional Herbal Isolate=amyrenone	-7.2
5700	O[C@@H]1C(C)(C)[C@H]2[C@@](C)([C@H]3[C@@](C)([C@]4(C)C([C@H]5[C@@](C)(CC4)CCC(C)(C)C5)=CC3)CC2)CC1	Traditional Herbal Isolate=amyrenol;amyrin;beta-amyrenol	-7.2
5713	O=C1N(CCC[N+H]2CCN(C(c3ccccc3)c3ccccc3)CC2)c2c(N1)cccc2	NPC Approved Name=oxatimide	-7.2
5749	O[C@]1(C)OCC23[C@H]4[C@](C)([C@@]5(C)[C@H]([C@]6(C)[C@@H](C(C)(C)CCC6)CC5)CC4)CC[C@@H]2[C@H]1CC3	Traditional Herbal Isolate=adipedatol	-7.2
5775	O=C1[C@H]2[C@](C)([C@@H]3[C@@H]([C@@H]4[C@](C)([C@H]5[C@@H](C)C6(O[C@H]5C4)OC[C@H](C)CC6)CC3)C1)CC[C@H](O)C2	Traditional Herbal Isolate=laxogenin	-7.2
5785	O([C@H]1[C@H](O)[C@H](O)[C@H](O)[C@H](CO)O1)c1cc([O-])c2C(=O)C(c3ccc(O)cc3)=COc2c1	Indian Approved Name=genistin	-7.2
5908	O=C(N)C=1C(=O)[C@@]2(O)C([O-])=C3C(=O)c4c([O-])cccc4C(=C)[C@H]3[C@@H](O)[C@H]2[C@@H]([N+H](C)C)C=1[O-]	FDA Approved Drug=METHACYCLINE HYDROCHLORIDE	-7.2
5927	O=C1[C@@H](C)[C@@]2(C)[C@H]([C@@]3(C)[C@H](C(=O)C2)[C@@]2(C)[C@](C)([C@H]4[C@](C)(CC2)CCC(C)(C)C4)CC3)CC1	Traditional Herbal Isolate=putranjivadione	-7.2
6083	O([C@H]1[C@@H](O)[C@H](O)[C@@H](O)[C@H](CO)O1)C1=C(c2ccc(O)cc2)Oc2c(c([O-])cc(O)c2)C1=O	Traditional Herbal Isolate=trifolin	-7.2
6085	O([C@H]1[C@@H](O)[C@H](O)[C@H](O)[C@H](CO)O1)C1=C(c2ccc(O)cc2)Oc2c(c([O-])cc(O)c2)C1=O	Traditional Herbal Isolate=kaempferol-3-glucoside;kaempferol-7-shamnoside	-7.2
6261	O=C([O-])[C@@H]1[C@H](O)[C@@H](O)[C@H](O)[C@H](Oc2c(O)c([O-])c3C(=O)C=C(c4ccc(O)cc4)Oc3c2)O1	Traditional Herbal Isolate=scutellarin	-7.2
6290	O[C@H]1C(C)(C)[C@H]2[C@@](C)([C@H]3[C@](O)(C[C@@]4(C)[C@H]([C@@]5(C)[C@H](C(C)(C)[C@@H](O)CC5)CC4)CC3)CC2)CC1	Traditional Herbal Isolate=tohogenol	-7.2
6476	Clc1ccc(NC=2/C(=N\C(C)C)/C=C3N(c4ccc(Cl)cc4)c4c(N=C3C=2)cccc4)cc1	WHO Essential Medicine=clofazimine Indian Approved Name=clofazimine FDA Approved Drug=CLOFAZIMINE	-7.2
6553	O=C(OC[C@]12C(=O)O[C@]3(C)[C@@]1(O[C@H]1[C@@H](O)[C@H](O)[C@H](O)[C@H](CO)O1)C[C@H]2[C@@H](O)C3)c1ccccc1	Traditional Herbal Isolate=albiflorin	-7.2
6720	S(=O)([O-])(=NC(=O)NC1CCC(C)CC1)c1ccc(CCNC(=O)N2C(=O)C(CC)=C(C)C2)cc1	China Approved Name=glimepiride Indian Approved Name=glimepiride Australia Approved Name=GLIMEPIRIDE FDA Approved Drug=GLIMEPIRIDE	-7.2
6753	O=C(Oc1cc2c(cc1)CCC2)[C@H](C(=O)N[C@H]1C(=O)N2[C@@H](C(=O)[O-])C(C)(C)S[C@H]12)c1ccccc1	NPC Approved Name=carindacillin	-7.2
6869	O=C1C2(O)C34[C@@](C)(O1)[C@@H]1OC(=O)C(=C)[C@@](C)([C@@H]3C(=O)[C@](O)(O4)[C@H]3[C@H]([C@@]4(C)C(=O)C=CCC4=CC3)CC2)C1	Traditional Herbal Isolate=physalin c	-7.2
6954	O(C)[C@H]1[C@@H](O)[C@H](C)O[C@H](O[C@H]2C[C@@H]3[C@@](C)([C@H]4[C@@H]([C@]5(O)[C@@](C)([C@H](C6=CC(=O)OC6)CC5)CC4)CC3)CC2)C1	Traditional Herbal Isolate=somalin	-7.2
6957	O(C)[C@@H]1[C@H](O)[C@H](C)O[C@@H](O[C@@H]2C[C@@H]3[C@](C)([C@H]4[C@@H]([C@]5(O)[C@@](C)([C@H](C6=CC(=O)OC6)CC5)CC4)CC3)CC2)C1	Traditional Herbal Isolate=somalin	-7.2
6990	O([C@@H]1[C@@H](O)[C@H](O)[C@@H](O)[C@@H](C)O1)[C@@H]1C[C@H]2[C@@](C)([C@H]3[C@H]([C@]4(O)[C@](C)([C@H](C5=CC(=O)OC5)CC4)CC3)CC2)CC1	Traditional Herbal Isolate=evomonoside	-7.2
7007	O=C1C2(O)C34[C@](C)(O1)[C@H]1OC(=O)[C@@H]5[C@@](C)([C@@H]3C(=O)C(O4)(OC5)[C@@H]3[C@@H]([C@]4(C)C(=O)C=CCC54OC5C3)CC2)C1	Traditional Herbal Isolate=physalin b	-7.2
7067	O=C(O[C@H]1[C@@H](O)[C@@H]2C(C(=O)OC)=CO[C@@H](O[C@H]3[C@@H](O)[C@H](O)[C@H](O)[C@H](CO)C3)[C@H]2[C@H]1C)/C=C/c1ccccc1	Traditional Herbal Isolate=iridoid glucosides	-7.2
7073	O=C(O[C@H]1[C@@H](O)[C@@H]2C(C(=O)OC)=CO[C@@H](O[C@H]3[C@@H](O)[C@@H](O)[C@H](O)[C@H](CO)C3)[C@H]2[C@H]1C)/C=C/c1ccccc1	Traditional Herbal Isolate=iridoid glucosides	-7.2
7081	O(C)[C@H]1[C@@H](O)[C@@H](C)O[C@H](O[C@@H]2C[C@H]3[C@@](C)([C@H]4[C@H]([C@]5(O)[C@](C)([C@@H]([C@@H](O)C5)C5=CC(=O)OC5)CC4)CC3)CC2)C1	Traditional Herbal Isolate=deacetylo-leandrin	-7.2
7088	O(C)[C@H]1[C@@H](O)[C@H](C)O[C@H](O[C@@H]2C[C@H]3[C@@](C)([C@@H]4[C@H]([C@]5(O)[C@](C)([C@@H]([C@@H](O)C5)C5=CC(=O)OC5)CC4)CC3)CC2)C1	Traditional Herbal Isolate=deacetylo-leandrin	-7.2
7107	O([C@H]1[C@@H](O)[C@H](O)[C@@H](O)[C@H](C)O1)[C@@H]1C[C@]2(O)[C@@](C)([C@@H]3[C@@H]([C@]4(O)[C@@](C)([C@H](C5=CC(=O)OC5)CC4)CC3)CC2)CC1	Traditional Herbal Isolate=peripalloside	-7.2
7108	O([C@H]1[C@@H](O)[C@@H](O)[C@@H](O)[C@@H](C)O1)[C@@H]1C[C@]2(O)[C@@](C)([C@@H]3[C@@H]([C@]4(O)[C@@](C)([C@H](C5=CC(=O)OC5)CC4)CC3)CC2)CC1	Traditional Herbal Isolate=peripalloside	-7.2
7113	O([C@H]1[C@H](O)[C@@H](O)[C@@H](O)[C@@H](C)O1)[C@@H]1C[C@]2(O)[C@@](C)([C@@H]3[C@H]([C@]4(O)[C@@](C)([C@H](C5=CC(=O)OC5)CC4)CC3)CC2)CC1	Traditional Herbal Isolate=peripalloside	-7.2
7235	O=C[C@]12[C@@](O)(C[C@@H](O[C@H]3[C@H](O)[C@@H](O)[C@@H](O)[C@H](C)O3)CC1)CC[C@H]1[C@]3(O)[C@@](C)([C@H](C4=CC(=O)OC4)CC3)CC[C@@H]21	Traditional Herbal Isolate=strophalloside	-7.2
7248	O([C@@H]1[C@H](O)[C@@H](O)[C@@H](O)[C@@H](C)O1)[C@@H]1C[C@]2(O)[C@@](CO)([C@@H]3[C@H]([C@]4(O)[C@@](C)([C@H](C5=CC(=O)OC5)CC4)CC3)CC2)CC1	Traditional Herbal Isolate=convallatoxol	-7.2
7257	O([C@@H]1[C@H](O)[C@H](O)[C@@H](O)[C@@H](C)O1)[C@@H]1C[C@]2(O)[C@@](C)([C@@H]3[C@H]([C@]4(O)[C@@](C)([C@H](O)C3)[C@H](C3=CC(=O)OC3)CC4)CC2)CC1	Traditional Herbal Isolate=alpha-antioside	-7.2
7262	O([C@H]1[C@H](O)[C@H](O)[C@H](O)[C@H](C)O1)[C@@H]1C[C@]2(O)[C@@](C)([C@@H]3[C@H]([C@]4(O)[C@@](C)([C@H](O)C3)[C@H](C3=CC(=O)OC3)CC4)CC2)CC1	Traditional Herbal Isolate=alpha-antioside	-7.2
7269	O([C@H]1[C@@H](O)[C@H](O)[C@@H](O)[C@@H](C)O1)[C@@H]1C[C@]2(O)[C@@](C)([C@H]3[C@H]([C@]4(O)[C@@](C)([C@H](O)C3)[C@H](C3=CC(=O)OC3)CC4)CC2)CC1	Traditional Herbal Isolate=alpha-antioside	-7.2
7281	C(=C\C=C\C=C(/C=C\C=C(\C=C\[C@]12C(C)(C)CCC[C@@]1(C)O2)/C)\C)(\C=C/C=C(/C=C/[C@H]1C(C)=CCCC1(C)C)\C)/C	Traditional Herbal Isolate=alpha-carotene-5 6-epoxide	-7.2
7321	O=C([C@](O)(C)[C@H]1[C@@H](O)C[C@]2(C)[C@]1(C)CC(=O)[C@@]1(C)[C@H]2CC=C2C(C)(C)[C@@H](O)C(=O)C[C@@H]12)/C=C/C(OC(=O)C)(C)C	Traditional Herbal Isolate=iso-cucurbitacin b	-7.2
7329	O=C([C@](O)(C)[C@@H]1[C@H](O)C[C@@]2(C)[C@@]1(C)CC(=O)[C@@]1(C)[C@H]2CC=C2C(C)(C)[C@@H](O)C(=O)C[C@H]12)/C=C/C(OC(=O)C)(C)C	Traditional Herbal Isolate=iso-cucurbitacin b	-7.2
7380	O[C@H]1CC(C)(C)C(/C=C/C(=C\C=C\C(=C/C=C/C=C(\C=C\C=C(/C=C/C=2C(C)(C)C[C@@H](O)CC=2C)\C)/C)\C)/C)=C(C)C1	Indian Approved Name=zeaxanthin	-7.2
7385	O=C(N(C)[C@@H]1[C@H](OC)[C@]2(C)O[C@H](n3c4c5n2c2c(c5c5c(C(=O)NC5)c4c4c3cccc4)cccc2)C1)c1ccccc1	NPC Approved Name=midostaurin	-7.2
7391	O[C@H]1C2Oc3c(O)c(-c4c(O)c5OC6[C@@H](O)C=C[C@H]7[C@H]8[N+@@H](C)CCC67c5c(c4)C8)cc4c3C32[C@H]([C@H]([N+@H](C)CC3)C4)C=C1	Traditional Herbal Isolate=pseudomorphine	-7.2
7403	Oc1c(C(C)C)c2c([C@@]3(C)[C@@H](C(C)(C)CCC3)CC2)cc1-c1c(O)c(C(C)C)c2c([C@]3(C)[C@H](C(C)(C)CCC3)CC2)c1	Traditional Herbal Isolate=podototarin	-7.2
7414	O=C(O[C@@H]1[C@@]2(O)O[C@H]3[C@@H](O[C@H]2O[C@@H](C)C1)C[C@@H]1[C@@](C=O)([C@H]2[C@@H]([C@]4(O)[C@@](C)([C@@H](C5=CC(=O)OC5)CC4)CC2)CC1)C3)C	Traditional Herbal Isolate=asclepiadin;asclepin	-7.2
7417	O=C(O[C@H]1[C@]2(O)O[C@@H]3[C@H](O[C@H]2O[C@H](C)C1)C[C@@H]1[C@@](C=O)([C@H]2[C@H]([C@@]4(O)[C@@](C)([C@@H](C5=CC(=O)OC5)CC4)CC2)CC1)C3)C	Traditional Herbal Isolate=asclepiadin;asclepin	-7.2
7522	O[C@H]1C=C(C)[C@H](/C=C/C(=C/C=C\C(=C/C=C/C=C(\C=C/C=C(/C=C/[C@@]23C(C)(C)C[C@H](O)C[C@@]2(C)O3)\C)/C)\C)/C)C(C)(C)C1	Traditional Herbal Isolate=taraxanthin	-7.2
7533	O=C(/C=C/C(=C\C=C\C(=C/C=C/C=C(\C=C\C=C(/C=C/C=1C(C)(C)C[C@@H](O)CC=1C)\C)/C)\C)/C)[C@@]1(C)C(C)(C)C[C@@H](O)C1	Indian Approved Name=capsicum oleoresin;oleoresin capsicum	-7.2
7535	O=C(/C=C/C(=C\C=C\C(=C/C=C/C=C(\C=C\C=C(/C=C/C=1C(C)(C)C[C@@H](O)CC=1C)\C)/C)\C)/C)[C@]1(C)C(C)(C)C[C@@H](O)C1	Indian Approved Name=capsicum oleoresin;oleoresin capsicum	-7.2
7537	O=C(/C=C/C(=C\C=C\C(=C/C=C/C=C(\C=C\C=C(/C=C/C=1C(C)(C)C[C@@H](O)CC=1C)\C)/C)\C)/C)[C@@]1(C)C(C)(C)C[C@H](O)C1	Indian Approved Name=capsicum oleoresin;oleoresin capsicum	-7.2
7572	O(C[C@H]1[C@H](O)[C@H](O)[C@@H](O)[C@H](Oc2cc([O-])c3C(=O)C=C(c4ccc(OC)cc4)Oc3c2)O1)[C@H]1[C@H](O)[C@H](O)[C@H](O)[C@@H](C)O1	Traditional Herbal Isolate=linarin	-7.2
7609	O(C[C@H]1[C@@H](O)[C@H](O)[C@H](O)[C@H](OC2=C(c3ccc(O)cc3)Oc3c(c([O-])cc(O)c3)C2=O)O1)[C@H]1[C@H](O)[C@@H](O)[C@H](O)[C@@H](C)O1	Traditional Herbal Isolate=kaempferol-3-robinobioside	-7.2
7617	O(C)c1c2Oc3c4OCOc4cc4c3[C@H]([N+@H](C)CC4)Cc3ccc(Oc4c(O)ccc(c4)C[C@H]4[N+@H](C)CCc(c4c2)c1)cc3	Traditional Herbal Isolate=cepharanoline	-7.2
7694	O(C)c1c([C@H]2[C@H](O)[C@@H](O)[C@H](O)[C@H](CO)O2)c([O-])c2C(=O)C=C(c3ccc(O[C@H]4[C@@H](O)[C@@H](O)[C@H](O)[C@@H](CO)O4)cc3)Oc2c1	Traditional Herbal Isolate=flavocommelitin	-7.2
7727	O(C)c1c(O)c2Oc3c(OC)cc4c([C@@H]([N+@H](C)CC4)Cc4ccc(Oc5c(OC)ccc(c5)C[C@H]5[N+@@H](C)CCc(c25)c1)cc4)c3	Traditional Herbal Isolate=fangchinoline	-7.2
7736	O(C)c1c(O)c2Oc3c(OC)cc4c([C@H]([N+@@H](C)CC4)Cc4cc(c(OC)cc4)Oc4ccc(cc4)C[C@H]4[N+@@H](C)CCc(c24)c1)c3	Traditional Herbal Isolate=homoaromoline	-7.2
7758	O(C)c1c(O)c2Oc3ccc(cc3)C[C@@H]3[N+@@H](C)CCc4c3cc(c(OC)c4)Oc3c(O)ccc(c3)C[C@@H]3[N+](C)(C)CCc(c23)c1	FDA Approved Drug=TUBOCURARINE CHLORIDE	-7.2
7803	O(C)c1c(OC)cc2c([C@@H](Cc3ccc(Oc4c(O)ccc(C[C@@H]5[N+@@H](C)CCc6c5cc(OC)c(O)c6)c4)cc3)[N+@H](C)CC2)c1	Traditional Herbal Isolate=dauricinoline	-7.2
7842	O=C(O[C@@H]1C(C)(C)[C@H]2[C@@](C)([C@H]3[C@](C)([C@]4(C)C([C@@H]5[C@@H](C)[C@@H](CO)CC[C@]5(C(=O)[O-])CC4)=CC3)CC2)CC1)/C=C/c1ccc(O)cc1	Traditional Herbal Isolate=rubicoumaric acid	-7.2
7846	O=C([O-])[C@H]1[C@H](O)[C@@H](O)[C@H](O)[C@H](Oc2cc([O-])c3C(=O)C=C(c4ccc(O[C@H]5[C@@H](O)[C@H](O)[C@@H](O)[C@@H](C(=O)[O-])O5)cc4)Oc3c2)O1	Traditional Herbal Isolate=apigenin-7-diglucuronide	-7.2
7860	O=C([O-])[C@H]1[C@H](O)[C@H](O)[C@H](O)[C@H](Oc2cc([O-])c3C(=O)C=C(c4ccc(O[C@H]5[C@@H](O)[C@@H](O)[C@@H](O)[C@H](C(=O)[O-])O5)cc4)Oc3c2)O1	Traditional Herbal Isolate=apigenin-7-diglucuronide	-7.2
7882	O(C)c1c(OC)cc2c([C@H](Cc3cc(Oc4ccc(C[C@H]5[N+@H](C)CCc6c5cc(OC)c(OC)c6)cc4)c(O)cc3)[N+@H](C)CC2)c1	Traditional Herbal Isolate=dauricine	-7.2
8077	S(c1scc(-c2cc[n+](C)cc2)n1)C1=C(C(=O)[O-])N2C(=O)[C@H](NC(=O)/C(=N/OCC)/c3nc(NP(=O)([O-])[O-])sn3)[C@H]2SC1	FDA Approved Drug=CEFTAROLINE FOSAMIL	-7.2
8117	O(C[C@H]1[C@H](O)[C@@H](OC)[C@H](O)[C@H](O[C@@H]2C[C@]3(O)[C@@](C)([C@H]4[C@H]([C@]5(O)[C@@](C)([C@H](C6=CC(=O)OC6)CC5)CC4)CC3)CC2)O1)[C@@H]1[C@H](C)O[C@H](O)C[C@H]1O	Traditional Herbal Isolate=periplocin	-7.2
8122	O(C[C@@H]1[C@H](O)[C@@H](O)[C@H](O)[C@H](O[C@@H]2C[C@]3(O)[C@@](CO)([C@@H]4[C@@H]([C@]5(O)[C@@](C)([C@H](C6=CC(=O)OC6)CC5)CC4)CC3)CC2)O1)[C@@H]1[C@H](C)O[C@H](O)C[C@H]1O	Traditional Herbal Isolate=erysimosol	-7.2
8130	O(C[C@@H]1[C@H](O)[C@@H](O)[C@H](O)[C@H](O[C@@H]2C[C@]3(O)[C@@](CO)([C@@H]4[C@H]([C@]5(O)[C@@](C)([C@H](C6=CC(=O)OC6)CC5)CC4)CC3)CC2)O1)[C@@H]1[C@H](C)O[C@H](O)C[C@@H]1O	Traditional Herbal Isolate=erysimosol	-7.2
8157	FC(F)(F)C(=O)N[C@@H]1[C@H](O)[C@@H](C)O[C@H](O[C@@H]2c3c([O-])c4C(=O)c5c(OC)cccc5C(=O)c4c([O-])c3C[C@@](O)(C(=O)COC(=O)CCCC)C2)C1	FDA Approved Drug=VALRUBICIN	-7.2
8166	FC(F)(F)C(=O)N[C@@H]1[C@H](O)[C@H](C)O[C@@H](O[C@@H]2c3c([O-])c4C(=O)c5c(OC)cccc5C(=O)c4c([O-])c3C[C@@](O)(C(=O)COC(=O)CCCC)C2)C1	FDA Approved Drug=VALRUBICIN	-7.2
8174	O=C([O-])[C@@H]1[C@@H](O)[C@@H](O)[C@H](O)[C@H](O[C@H]2[C@H](O)[C@@H](O)[C@H](CO)O[C@H]2Oc2c(O)cc3/[N+](=C\C=C\4/C=C(C(=O)[O-])[N+H2][C@H](C(=O)[O-])C/4)/[C@@H](C(=O)[O-])Cc3c2)O1	Traditional Herbal Isolate=iso-amaranthin	-7.2
8181	O=C([O-])[C@@H]1[C@@H](O)[C@@H](O)[C@@H](O)[C@H](O[C@H]2[C@H](O)[C@H](O)[C@H](CO)O[C@H]2Oc2c(O)cc3/[N+](=C\C=C\4/C=C(C(=O)[O-])[N+H2][C@@H](C(=O)[O-])C/4)/[C@@H](C(=O)[O-])Cc3c2)O1	Traditional Herbal Isolate=iso-amaranthin	-7.2
8182	O=C([O-])[C@@H]1[C@@H](O)[C@@H](O)[C@H](O)[C@H](O[C@@H]2[C@H](O)[C@@H](O)[C@H](CO)O[C@H]2Oc2c(O)cc3/[N+](=C\C=C\4/C=C(C(=O)[O-])[N+H2][C@@H](C(=O)[O-])C/4)/[C@@H](C(=O)[O-])Cc3c2)O1	Traditional Herbal Isolate=iso-amaranthin	-7.2
8183	O=C([O-])[C@@H]1[C@@H](O)[C@@H](O)[C@H](O)[C@H](O[C@H]2[C@H](O)[C@@H](O)[C@H](CO)O[C@H]2Oc2c(O)cc3/[N+](=C\C=C\4/C=C(C(=O)[O-])[N+H2][C@@H](C(=O)[O-])C/4)/[C@@H](C(=O)[O-])Cc3c2)O1	Traditional Herbal Isolate=iso-amaranthin	-7.2
8224	Clc1c(OC)cc2cc1N(C)C(=O)C[C@@H](OC(=O)[C@H](N(C(=O)CC(C)C)C)C)[C@@]1(C)O[C@H]1[C@@H](C)C1OC(=O)NC(O)([C@H](OC)/C=C/C=C(/C)\C2)C1	Traditional Herbal Isolate=maytanvaline	-7.2
8231	Clc1c(OC)cc2cc1N(C)C(=O)C[C@H](OC(=O)[C@H](N(C(=O)CC(C)C)C)C)[C@@]1(C)O[C@@H]1[C@H](C)C1OC(=O)NC(O)([C@@H](OC)/C=C/C=C(/C)\C2)C1	Traditional Herbal Isolate=maytanvaline	-7.2
8331	O=C([O-])[C@]12[C@@H](C=3[C@](C)([C@@]4(C)[C@@H]([C@]5(C)[C@H](C(C)(C)[C@@H](O[C@H]6[C@@H](O[C@H]7[C@@H](O)[C@H](O)[C@H](O)[C@H](CO)O7)[C@H](O)[C@H](O)[C@H](CO)O6)CC5)CC4)CC=3)CC1)CC(C)(C)CC2	Traditional Herbal Isolate=dianthronic heteroside	-7.2
8415	O=CO[C@H]1[C@@H]([C@]2(C)[C@@](O)([C@@H]3[C@H]([C@@]4(C)[C@H](C[C@@H](O[C@@H]5O[C@H](C)[C@H](O[C@@H]6O[C@@H](C)[C@@H](O[C@@H]7O[C@@H](C)[C@@H](O)[C@H](O)C7)[C@H](O)C6)[C@@H](O)C5)CC4)CC3)CC2)C1)C1=CC(=O)OC1	Traditional Herbal Isolate=gitaloxin	-7.2
8465	O(C)[C@@H]1[C@H](O)[C@H](O[C@@H]2[C@@H](C)O[C@@H](O[C@H]3[C@H](C)O[C@@H](O[C@@H]4C[C@@H]5[C@@](C)([C@H]6[C@](O)([C@@]7(O)[C@](C)([C@H](O)C6)[C@@](O)([C@@H](O)C)CC7)CC5)CC4)C[C@H]3OC)C[C@@H]2OC)O[C@H](C)[C@H]1O	Traditional Herbal Isolate=tenacissoside a	-7.2
8488	O=C(O[C@H]1[C@@H](O)[C@@H](O)[C@H](O)[C@@H](CO)O1)[C@]1(C)[C@@H](O)[C@H](O)C[C@@]2(C)[C@@H]3[C@](C)([C@]4(CO)C([C@H]5[C@@](C(=O)O[C@@H]6[C@@H](O)[C@@H](O)[C@@H](O)[C@H](CO)O6)(CC4)CCC(C)(C)C5)=CC3)CC[C@H]12	Traditional Herbal Isolate=prosapogenin	-7.2
8489	O=C(O[C@@H]1[C@@H](O)[C@@H](O)[C@@H](O)[C@H](CO)O1)[C@@]1(C)[C@@H](O)[C@H](O)C[C@]2(C)[C@@H]3[C@@](C)([C@@]4(CO)C([C@H]5[C@](C(=O)O[C@@H]6[C@@H](O)[C@@H](O)[C@@H](O)[C@@H](CO)O6)(CC4)CCC(C)(C)C5)=CC3)CC[C@H]12	Traditional Herbal Isolate=prosapogenin	-7.2
8527	O([C@H]1[C@H](O[C@H]2[C@H](O)[C@@H](O)[C@@H](O)[C@@H](C)O2)[C@H](O[C@H]2CC=3[C@](C)([C@@H]4[C@H]([C@H]5[C@@](C)([C@@H]6[C@@H](C)[C@H]7[N+H]([C@H]6C5)C[C@@H](C)CC7)CC4)CC=3)CC2)O[C@H](CO)[C@H]1O)[C@@H]1[C@@H](O)[C@@H](O)[C@@H](O)[C@@H](CO)O1	Traditional Herbal Isolate=solanine	-7.2
8528	O([C@@H]1[C@@H](O[C@@H]2[C@@H](O)[C@@H](O)[C@H](O)[C@@H](C)O2)[C@@H](O[C@H]2CC=3[C@@](C)([C@@H]4[C@H]([C@@H]5[C@@](C)([C@@H]6[C@H](C)[C@@H]7[N+H]([C@@H]6C5)C[C@H](C)CC7)CC4)CC=3)CC2)O[C@@H](CO)[C@@H]1O)[C@@H]1[C@@H](O)[C@H](O)[C@H](O)[C@H](CO)O1	Traditional Herbal Isolate=solanine	-7.2
8529	O([C@@H]1[C@@H](O[C@H]2[C@@H](O)[C@H](O)[C@@H](O)[C@@H](C)O2)[C@@H](O[C@@H]2CC=3[C@@](C)([C@@H]4[C@H]([C@@H]5[C@@](C)([C@@H]6[C@@H](C)[C@@H]7[N+H]([C@H]6C5)C[C@@H](C)CC7)CC4)CC=3)CC2)O[C@@H](CO)[C@@H]1O)[C@@H]1[C@H](O)[C@@H](O)[C@@H](O)[C@H](CO)O1	Traditional Herbal Isolate=solanine	-7.2
8536	O([C@@H]1[C@H](O[C@H]2[C@@H](O)[C@H](O)[C@@H](O)[C@H](C)O2)[C@@H](O[C@@H]2CC=3[C@](C)([C@H]4[C@@H]([C@H]5[C@](C)([C@H]6[C@@H](C)[C@H]7[N+H]([C@@H]6C5)C[C@@H](C)CC7)CC4)CC=3)CC2)O[C@H](CO)[C@@H]1O)[C@@H]1[C@@H](O)[C@H](O)[C@@H](O)[C@H](CO)O1	Traditional Herbal Isolate=solanine	-7.2
8537	O([C@@H]1[C@H](O[C@H]2[C@@H](O)[C@H](O)[C@H](O)[C@@H](C)O2)[C@H](O[C@@H]2CC=3[C@@](C)([C@H]4[C@H]([C@H]5[C@](C)([C@@H]6[C@@H](C)[C@@H]7[N+H]([C@@H]6C5)C[C@H](C)CC7)CC4)CC=3)CC2)O[C@H](CO)[C@@H]1O)[C@@H]1[C@@H](O)[C@@H](O)[C@H](O)[C@@H](CO)O1	Traditional Herbal Isolate=solanine	-7.2
8539	O([C@H]1[C@H](O[C@H]2[C@@H](O)[C@H](O)[C@@H](O)[C@@H](C)O2)[C@H](O[C@H]2CC=3[C@@](C)([C@H]4[C@H]([C@@H]5[C@](C)([C@H]6[C@@H](C)[C@@H]7[N+H]([C@H]6C5)C[C@@H](C)CC7)CC4)CC=3)CC2)O[C@H](CO)[C@H]1O)[C@H]1[C@@H](O)[C@H](O)[C@H](O)[C@@H](CO)O1	Traditional Herbal Isolate=solanine	-7.2
8552	O=C([O-])[C@@]12[C@H](C=3[C@@](C)([C@@]4(C)[C@@H]([C@@]5(C)[C@@H](C(C)(C)[C@H](O[C@H]6[C@H](O[C@@H]7[C@@H](O[C@H]8[C@H](O)[C@H](O)[C@@H](O)[C@H](C)O8)[C@H](O)[C@@H](O)[C@@H](CO)O7)[C@@H](O)[C@H](O)CO6)CC5)CC4)CC=3)CC1)CC(C)(C)CC2	Traditional Herbal Isolate=raddeanin a	-7.2
8561	O=C([O-])[C@]12[C@H](C=3[C@@](C)([C@@]4(C)[C@H]([C@]5(C)[C@@H](C(C)(C)[C@H](O[C@H]6[C@H](O[C@@H]7[C@H](O[C@H]8[C@H](O)[C@H](O)[C@@H](O)[C@@H](C)O8)[C@H](O)[C@H](O)[C@@H](CO)O7)[C@@H](O)[C@H](O)CO6)CC5)CC4)CC=3)CC1)CC(C)(C)CC2	Traditional Herbal Isolate=raddeanin a	-7.2
8564	O=C([O-])[C@@]12[C@@H](C=3[C@](C)([C@@]4(C)[C@@H]([C@@]5(C)[C@@H](C(C)(C)[C@H](O[C@@H]6[C@H](O[C@@H]7[C@@H](O[C@@H]8[C@@H](O)[C@H](O)[C@H](O)[C@H](C)O8)[C@@H](O)[C@H](O)[C@@H](CO)O7)[C@H](O)[C@H](O)CO6)CC5)CC4)CC=3)CC1)CC(C)(C)CC2	Traditional Herbal Isolate=raddeanin a	-7.2
8565	O=C([O-])[C@@]12[C@@H](C=3[C@](C)([C@@]4(C)[C@@H]([C@@]5(C)[C@H](C(C)(C)[C@@H](O[C@@H]6[C@@H](O[C@H]7[C@H](O[C@@H]8[C@@H](O)[C@H](O)[C@@H](O)[C@@H](C)O8)[C@@H](O)[C@H](O)[C@@H](CO)O7)[C@H](O)[C@@H](O)CO6)CC5)CC4)CC=3)CC1)CC(C)(C)CC2	Traditional Herbal Isolate=raddeanin a	-7.2
8566	O=C([O-])[C@@]12[C@@H](C=3[C@@](C)([C@]4(C)[C@H]([C@@]5(C)[C@@H](C(C)(C)[C@H](O[C@H]6[C@@H](O[C@@H]7[C@H](O[C@H]8[C@H](O)[C@@H](O)[C@@H](O)[C@H](C)O8)[C@@H](O)[C@H](O)[C@@H](CO)O7)[C@H](O)[C@H](O)CO6)CC5)CC4)CC=3)CC1)CC(C)(C)CC2	Traditional Herbal Isolate=raddeanin a	-7.2
8601	O=C([O-])[C@@H]1[C@H](O[C@H]2[C@@H](O)[C@@H](O)[C@@H](CO)O2)[C@@H](O)[C@H](O)[C@@H](O[C@H]2C(C)(C)[C@@H]3[C@@](C)([C@H]4[C@](C)([C@@]5(C)C([C@H]6[C@@](C(=O)O[C@H]7[C@@H](O)[C@H](O)[C@H](O)[C@H](CO)O7)(CC5)CCC(C)(C)C6)=CC4)CC3)CC2)O1	Traditional Herbal Isolate=araloside a	-7.2
8609	O=C([O-])[C@@H]1[C@H](O)C[C@@H](O[C@@H]2[C@@H](O)[C@@H]([N+H3])[C@@H](O)[C@H](C)O2)/C=C/C=C/C=C/C=C/CC/C=C/C=C/[C@@H](C)[C@@H](O)[C@@H](C)[C@@H](C)OC(=O)C[C@@H](O)C[C@H](O)C[C@H](O)CC[C@H](O)[C@@H](O)CC(=O)C[C@@H]1O	China Approved Name=nystatin;Nystatin WHO Essential Medicine=nystatin Australia Approved Name=NYSTATIN FDA Approved Drug=NYSTATIN	-7.2
8611	O=C([O-])[C@H]1[C@H](O)C[C@H](O[C@H]2[C@@H](O)[C@@H]([N+H3])[C@@H](O)[C@H](C)O2)/C=C/C=C/C=C/C=C/CC/C=C/C=C/[C@@H](C)[C@H](O)[C@H](C)[C@H](C)OC(=O)C[C@H](O)C[C@H](O)C[C@@H](O)CC[C@@H](O)[C@H](O)CC(=O)C[C@@H]1O	China Approved Name=nystatin;Nystatin WHO Essential Medicine=nystatin Australia Approved Name=NYSTATIN FDA Approved Drug=NYSTATIN	-7.2
8617	O=C([O-])[C@@H]1[C@@H](O)C[C@@H](O[C@@H]2[C@@H](O)[C@@H]([N+H3])[C@@H](O)[C@H](C)O2)/C=C/C=C/C=C/C=C/CC/C=C/C=C/[C@@H](C)[C@H](O)[C@@H](C)[C@H](C)OC(=O)C[C@H](O)C[C@H](O)C[C@@H](O)CC[C@H](O)[C@@H](O)CC(=O)C[C@@H]1O	China Approved Name=nystatin;Nystatin WHO Essential Medicine=nystatin Australia Approved Name=NYSTATIN FDA Approved Drug=NYSTATIN	-7.2
8664	O=C(O[C@H]1[C@H](O)[C@H](O)[C@H](O)[C@H](CO[C@H]2[C@H](O)[C@@H](O)[C@H](O[C@H]3[C@H](O)[C@@H](O)[C@@H](O)[C@H](C)O3)[C@H](CO)O2)O1)[C@@]12[C@H]([C@@H](C)[C@H](C)CC1)C=1[C@@](C)([C@@]3(C)[C@@H]([C@@]4(C)[C@@H]([C@@H](O)C3)[C@@](CO)(C)[C@H](O)[C@@H](O)C4)CC=1)CC2	Traditional Herbal Isolate=madecassoside	-7.2
8720	O=C(N[C@H]1C(=O)N[C@H](Cc2ccccc2)C(=O)N[C@@H](Cc2c3c([nH]c2)cccc3)C(=O)N[C@@H](CCCC[N+H3])C(=O)N[C@@H]([C@@H](O)C)C(=O)N[C@H](C(=O)N[C@@H]([C@@H](O)C)CO)CSSC1)[C@H]([N+H3])Cc1ccccc1	Indian Approved Name=octreotide FDA Approved Drug=OCTREOTIDE ACETATE	-7.2
8746	O([C@H]1[C@H](O)[C@@H](O)[C@H](O[C@@H]2CC=3[C@](C)([C@H]4[C@@H]([C@@]5(O)[C@](C)([C@@H]6[C@H](C)C7(O[C@@H]6C5)OC[C@H](C)CC7)CC4)CC=3)CC2)O[C@H]1CO)[C@@H]1[C@@H](O[C@@H]2[C@@H](O)[C@H](O)[C@H](O)[C@@H](CO)O2)[C@@H](O[C@H]2[C@H](O)[C@@H](O)[C@@H](O)CO2)[C@H](O)[C@@H](CO)O1	Traditional Herbal Isolate=steroidal saponin pod-ii	-7.2
8762	O=C(NCC(=O)N)[C@@H](NC(=O)[C@@H]1N(C(=O)[C@H]2NC(=O)[C@@H](CC(=O)N)NC(=O)[C@H](CCC(=O)N)NC(=O)[C@@H](Cc3ccccc3)NC(=O)[C@H](Cc3ccc(O)cc3)NC(=O)[C@H]([N+H3])CSSC2)CCC1)CCCC[N+H3]	FDA Approved Drug=LYPRESSIN	-7.2
8779	O=C1Oc2c3c(O)cc4C(=O)Oc5c(O)c(O)c(-c6c(O)c(O)c(O)cc6C(=O)O[C@H]6[C@@H]7OC(=O)c8c(c(O)c(O)c(O)c8)-c8c(O)c(O)c(O)cc8C(=O)O[C@@H]7[C@H](O)O[C@H]6COC(=O)c6c(c(O)c(O)c(O)c6)O3)c1c5-c24	Traditional Herbal Isolate=terchebulin	-7.2
8806	O=C([O-])[C@H]1[C@@H](O)CC2(O)OC1C[C@@H](O[C@@H]1[C@@H](O)[C@@H]([N+H3])[C@@H](O)[C@H](C)O1)C=CC=CC=CC=CC=CC=CC=C[C@H](C)[C@H]([C@@H](C[C@@H]([C@H](O)CC(=O)c1ccc(N)cc1)C)C)OC(=O)CC(=O)CCCC(=O)C[C@@H](O)C[C@@H](O)C[C@H](O)C2	FDA Approved Drug=CANDICIDIN	-7.2
8809	O=C([O-])[C@@H]1[C@H](O)CC2(O)OC1C[C@@H](O[C@H]1[C@@H](O)[C@@H]([N+H3])[C@@H](O)[C@H](C)O1)C=CC=CC=CC=CC=CC=CC=C[C@H](C)[C@H]([C@@H](C[C@H]([C@@H](O)CC(=O)c1ccc(N)cc1)C)C)OC(=O)CC(=O)CCCC(=O)C[C@H](O)C[C@H](O)C[C@H](O)C2	FDA Approved Drug=CANDICIDIN	-7.2
8818	O=C([O-])[C@@H]1[C@@H](O)CC2(O)OC1C[C@@H](O[C@@H]1[C@@H](O)[C@@H]([N+H3])[C@@H](O)[C@H](C)O1)C=CC=CC=CC=CC=CC=CC=C[C@H](C)[C@@H]([C@H](C[C@H]([C@H](O)CC(=O)c1ccc(N)cc1)C)C)OC(=O)CC(=O)CCCC(=O)C[C@H](O)C[C@H](O)C[C@H](O)C2	FDA Approved Drug=CANDICIDIN	-7.2
8888	O(C[C@H](CC[C@@]1(O)[C@@H](C)[C@@H]2[C@@]3(C)[C@H]([C@@H]4[C@@H]([C@@]5(C)C(=CC4)C[C@H](O[C@@H]4[C@@H](O[C@H]6[C@@H](O)[C@@H](O)[C@@H](O)[C@@H](C)O6)[C@@H](O)[C@@H](O[C@@H]6[C@@H](O)[C@H](O)[C@H](O[C@H]7[C@H](O)[C@H](O)[C@H](O)[C@@H](C)O7)[C@@H](C)O6)[C@H](CO)O4)CC5)CC3)C[C@@H]2O1)C)[C@H]1[C@@H](O)[C@H](O)[C@H](O)[C@H](CO)O1	Traditional Herbal Isolate=asperoside;proto-isoerubosides	-7.2
8891	O(C[C@H](CC[C@@]1(O)[C@@H](C)[C@@H]2[C@]3(C)[C@H]([C@H]4[C@H]([C@@]5(C)C(=CC4)C[C@@H](O[C@@H]4[C@@H](O[C@H]6[C@@H](O)[C@@H](O)[C@@H](O)[C@@H](C)O6)[C@@H](O)[C@@H](O[C@@H]6[C@@H](O)[C@H](O)[C@H](O[C@H]7[C@H](O)[C@H](O)[C@H](O)[C@@H](C)O7)[C@@H](C)O6)[C@H](CO)O4)CC5)CC3)C[C@H]2O1)C)[C@H]1[C@@H](O)[C@H](O)[C@H](O)[C@H](CO)O1	Traditional Herbal Isolate=asperoside;proto-isoerubosides	-7.2
8896	O(C[C@@H](CC[C@@]1(O)[C@@H](C)[C@H]2[C@@]3(C)[C@H]([C@@H]4[C@@H]([C@]5(C)C(=CC4)C[C@H](O[C@@H]4[C@@H](O[C@H]6[C@@H](O)[C@@H](O)[C@@H](O)[C@@H](C)O6)[C@@H](O)[C@@H](O[C@@H]6[C@@H](O)[C@H](O)[C@H](O[C@H]7[C@H](O)[C@H](O)[C@H](O)[C@@H](C)O7)[C@@H](C)O6)[C@H](CO)O4)CC5)CC3)C[C@@H]2O1)C)[C@H]1[C@@H](O)[C@H](O)[C@H](O)[C@H](CO)O1	Traditional Herbal Isolate=asperoside;proto-isoerubosides	-7.2
8973	O=C([O-])[C@H](NC(=O)[C@@H]1N(C(=O)[C@H]2N(C(=O)[C@@H](NC(=O)[C@@H](NC(=O)CNC(=O)[C@H]3N(C(=O)[C@H]4N(C(=O)[C@@H](NC(=O)[C@H]([N+H3])CCC/[N+H]=C(\N)/N)CCC/[N+H]=C(\N)/N)CCC4)C[C@H](O)C3)Cc3sccc3)CO)Cc3c(cccc3)C2)[C@@H]2[C@H](C1)CCCC2)CCC/[N+H]=C(\N)/N	FDA Approved Drug=ICATIBANT ACETATE	-7.2
8987	O=C(N[C@H](C(=O)N[C@@H](C(=O)N[C@@H](C(=O)N[C@@H](C(=O)N1[C@@H](C(=O)NCC(=O)N)CCC1)CCC/[N+H]=C(\N)/N)CC(C)C)Cc1c2c([nH]c1)cccc2)Cc1ccc(O)cc1)[C@@H](NC(=O)[C@@H](NC(=O)[C@@H](NC(=O)[C@H]1NC(=O)CC1)Cc1[nH]cnc1)Cc1c2c([nH]c1)cccc2)CO	FDA Approved Drug=TRIPTORELIN PAMOATE	-7.2
3560	O[C@@]1(C)[C@@]2(C)[C@@H]([C@H]3[C@@H]([C@@]4(C)[C@H](Cc5nonc5C4)CC3)CC2)CC1	NPC Approved Name=furazabol	-7.1
4002	O=C([O-])/C=C/c1nc(/C(=C\C[N+H]2CCCC2)/c2ccc(C)cc2)ccc1	FDA Approved Drug=ACRIVASTINE	-7.1
4249	O=C(O[C@H]1[C@H](O)[C@@H]2C(=C)C(=O)O[C@H]2[C@H]2C(C)=CC(=O)[C@H]2[C@@H]1C)/C(=C\C)/C	Indian Approved Name=azardirachta indica	-7.1
4268	Clc1cc2C(c3c(F)cccc3)=N[C@@H](C(=O)OCC)C(=O)Nc2cc1	US Illegal/Scheduled Drug (Schedule 4)=Ethyl loflazepate	-7.1
4550	O[C@@H]1O[C@H]2[C@@H]([N+@H](C)CCc3c2cc2OCOc2c3)c2c1c1OCOc1cc2	Traditional Herbal Isolate=rhoeagenine	-7.1
4699	O=C1/C(=N/Nc2c(C)cc(N=Nc3c(C)cccc3)cc2)/c2c(cccc2)C=C1	NPC Approved Name=o-tolylazo-o-tolylazo-beta-naphthol	-7.1
4777	Clc1ccc(CC2=NN([C@@H]3CC[N+@H](C)CCC3)C(=O)c3c2cccc3)cc1	Indian Approved Name=azelastine FDA Approved Drug=AZELASTINE HYDROCHLORIDE	-7.1
4870	O=C(OCC(=O)[C@]1(O)[C@@]2(C)[C@@H]([C@H]3C([C@@]4(C)C(=CC(=O)CC4)CC3)=CC2)CC1)C	NPC Approved Name=anecortave acetate	-7.1
5011	O=C1Nc2c(O)ccc([C@H](O)C[N+H2]C3Cc4c(cc(CC)c(CC)c4)C3)c2C=C1	FDA Approved Drug=INDACATEROL MALEATE	-7.1
5077	O[C@H]1CC=2[C@@](C)([C@@H]3[C@H]([C@@H]4[C@@](C)([C@@H]5[C@H](C)[C@@H]6[N+H]([C@@H]5C4)C[C@H](C)CC6)CC3)CC=2)CC1	Traditional Herbal Isolate=solanidine	-7.1
5112	O([C@@H]1[C@@H](O)[C@@H](O)[C@H](O)[C@@H](CO)O1)C1=C(c2ccccc2)Oc2c(C1=O)cccc2	Traditional Herbal Isolate=irridoid glycosides;purpureal glycosides	-7.1
5139	O[C@@H]1C[C@@H]2[C@](C)([C@H]3[C@@H]([C@@H]4[C@](C)([C@H]([C@@H](/C=C/[C@@H](C(C)C)C)C)CC4)CC3)CC2)CC1	Traditional Herbal Isolate=spongesterol	-7.1
5189	Fc1c(N2c3nc(N4C[C@H]([N+H3])CC4)c(F)cc3C(=O)C(C(=O)[O-])=C2)ccc(F)c1	NPC Approved Name=tosufloxacin	-7.1
5226	Fc1cc2c(O[C@H]([C@H](O)C[N+H2]C[C@H](O)[C@@H]3Oc4c(cc(F)cc4)CC3)CC2)cc1	Indian Approved Name=nebivolol FDA Approved Drug=NEBIVOLOL HYDROCHLORIDE	-7.1
5228	Fc1cc2c(O[C@H]([C@@H](O)C[N+H2]C[C@H](O)[C@@H]3Oc4c(cc(F)cc4)CC3)CC2)cc1	Indian Approved Name=nebivolol FDA Approved Drug=NEBIVOLOL HYDROCHLORIDE	-7.1
5277	O[C@@H]1[C@@H]([C@H](C)c2c(C)c3c([C@@H]4[C@@H]([C@]5(C)C(=CC4)C[C@H](O)CC5)C3)cc2)[N+H2]C[C@@H](C)C1	Traditional Herbal Isolate=veratramine	-7.1
5279	C[C@@]12[C@H](C(C)(C)CC=C1)CC[C@]1(C)[C@@]3(C)[C@@H]([C@@H]4[C@@](C)(CC3)CCC(C)(C)C4)CC[C@@H]21	Traditional Herbal Isolate=oleanene derivatives	-7.1
5284	C(C)(C)[C@H]1[C@]2(C)[C@@H]([C@@]3(C)[C@@](C)([C@@H]4[C@](C)([C@H]5[C@](C)(C(C)=CCC5)CC4)CC3)CC2)CC1	Traditional Herbal Isolate=filicene	-7.1
5299	Fc1cc2onc(C3CC[N+H](CCC=4C(=O)N5C(=NC=4C)CCCC5)CC3)c2cc1	China Approved Name=risperidone Indian Approved Name=risperidone Australia Approved Name=RISPERIDONE FDA Approved Drug=RISPERIDONE	-7.1
5329	O=C(C)[C@@H]1[C@H]2[C@](C)([C@H]3[C@@](C)([C@]4(C)[C@H]([C@]5(C)[C@H](C(C)(C)CCC5)CC4)CC3)CC2)CC1	Traditional Herbal Isolate=adiantone	-7.1
5418	O[C@@H]1C[C@@H]2[C@@](C)([C@@H]3[C@@H]([C@@H]4[C@@](C)([C@H]5[C@@H](C)C6(O[C@H]5C4)OC[C@@H](C)CC6)CC3)CC2)CC1	Traditional Herbal Isolate=tigogenin;sarsasapogenin	-7.1
5618	O=CC=1[C@]2(C)[C@H]([C@]3(C)[C@H]([C@@]4(C)[C@@](C)([C@H]5[C@](C)([C@H](C(C)C)CC5)CC4)CC3)CC2)CCC=1	Traditional Herbal Isolate=filicenal	-7.1
5624	O=C1C(C)(C)[C@@H]2[C@@](C)(C=3[C@@H]([C@]4(C)[C@@](C)([C@H]5[C@@](C)([C@H](C(C)C)CC5)CC4)CC=3)CC2)CC1	Traditional Herbal Isolate=arborinone	-7.1
5681	O=C1[C@@H]2[C@](C)([C@]3(C)[C@@H]([C@@]4(C)[C@@H](C(C)(C)CCC4)CC3)C1)CC[C@@]1(C)[C@@H]2[C@@H](C(C)C)CC1	Traditional Herbal Isolate=clerodone	-7.1
5729	O[C@@H]1CC23[C@@](C)([C@@H]4C(OO2)([C@@H]2[C@@](C)([C@H]([C@H](/C=C/[C@H](C(C)C)C)C)CC2)CC4)C=C3)CC1	Traditional Herbal Isolate=ergosterol peroxide	-7.1
5738	O[C@@]1(C)OCC23[C@@H]4[C@@](C)([C@@]5(C)[C@H]([C@]6(C)[C@H](C(C)(C)CCC6)CC5)CC4)CC[C@@H]2[C@@H]1CC3	Traditional Herbal Isolate=adipedatol	-7.1
5740	O[C@@]1(C)OCC23[C@@H]4[C@](C)([C@@]5(C)[C@@H]([C@]6(C)[C@H](C(C)(C)CCC6)CC5)CC4)CC[C@@H]2[C@@H]1CC3	Traditional Herbal Isolate=adipedatol	-7.1
5741	O[C@@]1(C)OCC23[C@H]4[C@@](C)([C@@]5(C)[C@H]([C@]6(C)[C@H](C(C)(C)CCC6)CC5)CC4)CC[C@@H]2[C@H]1CC3	Traditional Herbal Isolate=adipedatol	-7.1
5742	O[C@@]1(C)OCC23[C@H]4[C@@](C)([C@@]5(C)[C@@H]([C@]6(C)[C@H](C(C)(C)CCC6)CC5)CC4)CC[C@@H]2[C@H]1CC3	Traditional Herbal Isolate=adipedatol	-7.1
5751	O[C@]1(C)OCC23[C@@H]4[C@](C)([C@@]5(C)[C@H]([C@]6(C)[C@@H](C(C)(C)CCC6)CC5)CC4)CC[C@@H]2[C@H]1CC3	Traditional Herbal Isolate=adipedatol	-7.1
5831	O[C@H]1[C@@H](O)C[C@@H]2[C@](C)([C@@H]3[C@@H]([C@@H]4[C@](C)([C@H]5[C@@H](C)[C@]6(O[C@H]5C4)OC[C@H](C)CC6)CC3)CC2)C1	Traditional Herbal Isolate=gitogenin	-7.1
5873	S(=O)(=O)(N)c1c(C)ccc(Nc2nc(N(C)c3cc4nn(C)c(C)c4cc3)ccn2)c1	FDA Approved Drug=PAZOPANIB HYDROCHLORIDE	-7.1
5889	O=C([O-])[C@H](NC(=O)c1ccc(NCc2nc3C(=O)N=C(N)Nc3nc2)cc1)CCC(=O)[O-]	FDA Approved Drug=FOLIC ACID	-7.1
5910	P(=O)(OCC(=O)[C@@]1(O)[C@]2(C)[C@H]([C@@H]3[C@H]([C@H](O)C2)[C@]2(C)C(=CC(=O)CC2)CC3)CC1)([O-])[O-]	FDA Approved Drug=HYDROCORTISONE SODIUM PHOSPHATE	-7.1
5954	O(C)[C@@H]1C(C)(C)[C@H]2[C@](C)(C=3[C@H]([C@]4(C)[C@@](C)([C@H]5[C@@](C)([C@H](C(C)C)CC5)CC4)CC=3)CC2)CC1	Traditional Herbal Isolate=cylindrin	-7.1
5959	Clc1cc2c(C3CC[N+H](CCN4C(=O)NCC4)CC3)cn(-c3ccc(F)cc3)c2cc1	NPC Approved Name=sertindol	-7.1
5994	O[C@@H]1[C@]2(C)[C@@H](C=3[C@@](C)([C@]4(C)[C@@H]([C@]5(C)[C@H](C(C)(C)[C@@H](O)CC5)CC4)CC=3)CC2)CC(C)(C)C1	Traditional Herbal Isolate=sophoradiol	-7.1
6087	O(C)c1ccc([C@@H]2Oc3c(c([O-])cc(O[C@H]4[C@@H](O)[C@H](O)[C@@H](O)[C@H](CO)O4)c3)C(=O)C2)cc1	Traditional Herbal Isolate=puddumin a	-7.1
6128	O=C(Oc1ccccc1)[C@@H](C(=O)N[C@H]1C(=O)N2[C@@H](C(=O)[O-])C(C)(C)S[C@H]12)c1ccccc1	NPC Approved Name=carfecillin	-7.1
6148	O=C([O-])[C@H](CC/C=C(\C)/C)[C@H]1[C@]2(C)[C@](C)(C3=C([C@@]4(C)[C@H](C(C)(C)C(=O)CC4)CC3)CC2)CC1	Traditional Herbal Isolate=pinicolic acid	-7.1
6193	O=C([O-])[C@@]1(C)[C@@H](O)CC[C@]2(C)[C@@H]1CC[C@]1(C)[C@]3(C)[C@@H]([C@@]4(C)[C@H]([C@H](C(=C)C)CC4)CC3)CC[C@@H]21	Traditional Herbal Isolate=woodwardic acid	-7.1
6210	O=C([O-])[C@H](NC(=O)c1ccc(NC[C@@H]2N(C)C=3C(=O)N=C(N)NC=3NC2)cc1)CCC(=O)[O-]	FDA Approved Drug=LEVOMEFOLATE CALCIUM	-7.1
6263	O=C(N[C@H]1C(=O)N2[C@@H](C(=O)[O-])C(C)(C)S[C@H]12)[C@@H](NC(=O)N1C(=O)NCC1)c1ccccc1	FDA Approved Drug=AZLOCILLIN SODIUM China Approved Name=azlocillin	-7.1
6274	O[C@H]1C(C)(C)[C@H]2[C@](C)([C@H]3[C@@](C)([C@]4(C)[C@H]([C@@H](O)C3)[C@H]([C@@]3(C)OC(C)(C)CCC3)CC4)CC2)CC1	Traditional Herbal Isolate=panaxadiol	-7.1
6278	O[C@@H]1C(C)(C)[C@H]2[C@](C)([C@H]3[C@](C)([C@@]4(C)[C@H]([C@H](O)C3)[C@H]([C@@]3(C)OC(C)(C)CCC3)CC4)CC2)CC1	Traditional Herbal Isolate=panaxadiol	-7.1
6289	O[C@@H]1C(C)(C)[C@H]2[C@](C)([C@H]3[C@](O)(C[C@@]4(C)[C@@H]([C@@]5(C)[C@@H](C(C)(C)[C@@H](O)CC5)CC4)CC3)CC2)CC1	Traditional Herbal Isolate=tohogenol	-7.1
6294	O[C@H]1C(C)(C)[C@H]2[C@](C)([C@H]3[C@](O)(C[C@@]4(C)[C@H]([C@@]5(C)[C@H](C(C)(C)[C@@H](O)CC5)CC4)CC3)CC2)CC1	Traditional Herbal Isolate=tohogenol	-7.1
6321	O=C(OCC(=O)[C@@]1(O)[C@]2(C)[C@H]([C@@H]3[C@H]([C@H](O)C2)[C@]2(C)C(=CC(=O)CC2)CC3)CC1)CCC(=O)[O-]	Indian Approved Name=hydrocortisone sodium succinate FDA Approved Drug=HYDROCORTISONE SODIUM SUCCINATE	-7.1
6335	O=C1C(C)=C2[C@@]([C@]34OC(=O)C(C)=C3C[C@H]3C(=C)CCC[C@]3(C)C4)(O1)C[C@]1(C)[C@H](C(=C)CCC1)C2	Traditional Herbal Isolate=biatractylolide	-7.1
6343	O(C[C@H]1[C@H](O)[C@@H](O)[C@H](O)[C@H](O)O1)C1=C(c2cc(O)c(O)cc2)Oc2c(c([O-])cc(O)c2)C1=O	Traditional Herbal Isolate=isoquercetrin;iso-quercitrin	-7.1
6347	O([C@H]1[C@@H](O)[C@H](O)[C@H](O)[C@H](CO)O1)C1=C(c2cc(O)c(O)cc2)Oc2c(c([O-])cc(O)c2)C1=O	Traditional Herbal Isolate=hirsutrin	-7.1
6411	P(=O)(OCC(=O)[C@@]1(O)[C@@H](C)C[C@@H]2[C@@]1(C)C[C@@H](O)[C@@]1(F)[C@@]3(C)C(=CC(=O)C=C3)CC[C@H]21)([O-])[O-]	China Approved Name=betamethasone 21â€phosphate disodium	-7.1
6438	O[C@@H]1C(C)(C)[C@@H]2[C@](C)([C@@H]3[C@@](C)(C45[C@H]([C@H]6[C@@](O)(C)C[C@@H](/C=C(\C)/C)OC6(OC4)C5)CC3)CC2)CC1	Traditional Herbal Isolate=jujubogenin	-7.1
6462	O[C@@H]1[C@@H]([C@H]2[C@@]3(C)[C@](C)(C=4[C@@H]([C@]5(C)[C@H](C(C)(C)[C@@H](O)CC5)CC=4)CC3)CC2)C[C@@H]([C@@H]2C(C)(C)O2)O1	Traditional Herbal Isolate=melianol	-7.1
6517	Fc1ccc(N2CC[N+H](CCCC(=O)N[C@@H]3c4c(SCc5c3cccc5)cccc4)CC2)cc1	NPC Approved Name=monatepil maleate	-7.1
6548	O=C(OC[C@@]12C(=O)O[C@]3(C)[C@@]1(O[C@H]1[C@@H](O)[C@H](O)[C@H](O)[C@H](CO)O1)C[C@H]2[C@H](O)C3)c1ccccc1	Traditional Herbal Isolate=albiflorin	-7.1
6620	O=C1[C@@]2(C)[C@H](C34C(C(C)(C)OC3CC(=O)OC4)=C1O)CCC1(C)[C@H](c3cocc3)OC(=O)C3O[C@@]213	Traditional Herbal Isolate=evodol	-7.1
6624	O=C1C(C)=C(C)C[C@@H]([C@]2(C)O[C@H](O)C34O[C@](O)([C@@H]5[C@@H]([C@@]6(C)C(=O)CC=CC6=CC5)CC3)CCC24)O1	Traditional Herbal Isolate=withaphysalin	-7.1
6718	Clc1c(NC(=O)c2sc(Nc3nc(C)nc(N4CC[N+H](CCO)CC4)c3)nc2)c(C)ccc1	FDA Approved Drug=DASATINIB	-7.1
6742	O[C@H](C(O)(C)C)[C@H]1O[C@H](O)[C@@H]([C@H]2[C@]3(C)[C@](C)(C=4[C@H]([C@]5(C)[C@@H](C(C)(C)[C@H](O)CC5)CC=4)CC3)CC2)C1	Traditional Herbal Isolate=melianotriol	-7.1
6749	Fc1ccc(C(CCCN2CC[N+H](CC(=O)Nc3c(C)cccc3C)CC2)c2ccc(F)cc2)cc1	Indian Approved Name=lidoflazine	-7.1
6767	O=C(C)[C@]1(O)C[C@@H](O[C@@H]2O[C@H](C)[C@H](O)[C@H]([N+H3])C2)c2c([O-])c3C(=O)c4c(C(=O)c3c([O-])c2C1)cccc4	Australia Approved Name=IDARUBICIN HYDROCHLORIDE FDA Approved Drug=IDARUBICIN HYDROCHLORIDE	-7.1
6905	ClC(Cl)[C@H]1[C@@H](C)COC2([C@H](C)[C@@H]3[C@]4(C)[C@H]([C@H]5[C@H]([C@@]6(C)[C@@H](O)C[C@@H](O)CC6=CC5)CC4)C[C@@H]3O2)C1	Traditional Herbal Isolate=abamagenin	-7.1
6908	ClC(Cl)[C@H]1[C@@H](C)COC2([C@H](C)[C@H]3[C@]4(C)[C@H]([C@@H]5[C@H]([C@]6(C)[C@@H](O)C[C@@H](O)CC6=CC5)CC4)C[C@@H]3O2)C1	Traditional Herbal Isolate=abamagenin	-7.1
6909	ClC(Cl)[C@H]1[C@@H](C)COC2([C@@H](C)[C@@H]3[C@@]4(C)[C@H]([C@H]5[C@H]([C@]6(C)[C@@H](O)C[C@@H](O)CC6=CC5)CC4)C[C@H]3O2)C1	Traditional Herbal Isolate=abamagenin	-7.1
6946	S(CC1=C(C(=O)[O-])N2C(=O)[C@H](NC(=O)Cc3c(C[N+H3])cccc3)[C@H]2SC1)c1n(CC(=O)[O-])nnn1	FDA Approved Drug=CEFORANIDE	-7.1
6958	O(C)[C@H]1[C@H](O)[C@H](C)O[C@H](O[C@@H]2C[C@H]3[C@@](C)([C@H]4[C@@H]([C@@]5(O)[C@](C)([C@H](C6=CC(=O)OC6)CC5)CC4)CC3)CC2)C1	Traditional Herbal Isolate=somalin	-7.1
6961	O(C)[C@H]1[C@H](O)[C@@H](C)O[C@H](O[C@H]2C[C@@H]3[C@@](C)([C@H]4[C@H]([C@]5(O)[C@](C)([C@@H](C6=CC(=O)OC6)CC5)CC4)CC3)CC2)C1	Traditional Herbal Isolate=somalin	-7.1
6964	O(C)[C@H]1[C@H](O)[C@@H](C)O[C@@H](O[C@H]2C[C@@H]3[C@@](C)([C@@H]4[C@H]([C@]5(O)[C@@](C)([C@H](C6=CC(=O)OC6)CC5)CC4)CC3)CC2)C1	Traditional Herbal Isolate=somalin	-7.1
6975	O=C1[C@H](C)[C@H](C[C@@H](O)[C@](O)(C)[C@@H]2[C@]3(C)[C@](O)(C=4[C@H]([C@]5(C)[C@@H](C(=O)C=4)C[C@H](O)[C@@H](O)C5)CC3)CC2)[C@H](C)O1	Traditional Herbal Isolate=cyasterone	-7.1
7026	FC1(F)[C@H]2[C@@H]1c1c(C(N3CC[N+H](C[C@@H](O)COc4c5c(nccc5)ccc4)CC3)c3c2cccc3)cccc1	NPC Approved Name=4-(1 1-difluoro-1 1a 6 10b-tetrahydrodibenzo(a e)cyclopropa(c)cyclohepten-6-yl)-	-7.1
7063	O=C(O[C@H]1[C@@H](O)[C@@H]2C(C(=O)OC)=CO[C@@H](O[C@@H]3[C@H](O)[C@H](O)[C@@H](O)[C@@H](CO)C3)[C@H]2[C@H]1C)/C=C/c1ccccc1	Traditional Herbal Isolate=iridoid glucosides	-7.1
7068	O=C(O[C@H]1[C@@H](O)[C@@H]2C(C(=O)OC)=CO[C@@H](O[C@@H]3[C@@H](O)[C@H](O)[C@H](O)[C@@H](CO)C3)[C@H]2[C@H]1C)/C=C/c1ccccc1	Traditional Herbal Isolate=iridoid glucosides	-7.1
7106	O([C@H]1[C@H](O)[C@H](O)[C@@H](O)[C@@H](C)O1)[C@@H]1C[C@]2(O)[C@@](C)([C@@H]3[C@@H]([C@]4(O)[C@@](C)([C@H](C5=CC(=O)OC5)CC4)CC3)CC2)CC1	Traditional Herbal Isolate=peripalloside	-7.1
7109	O([C@H]1[C@H](O)[C@H](O)[C@@H](O)[C@@H](C)O1)[C@@H]1C[C@]2(O)[C@@](C)([C@H]3[C@@H]([C@]4(O)[C@@](C)([C@H](C5=CC(=O)OC5)CC4)CC3)CC2)CC1	Traditional Herbal Isolate=peripalloside	-7.1
7110	O([C@H]1[C@H](O)[C@@H](O)[C@@H](O)[C@H](C)O1)[C@@H]1C[C@]2(O)[C@@](C)([C@H]3[C@@H]([C@]4(O)[C@@](C)([C@H](C5=CC(=O)OC5)CC4)CC3)CC2)CC1	Traditional Herbal Isolate=peripalloside	-7.1
7111	O([C@H]1[C@@H](O)[C@@H](O)[C@@H](O)[C@H](C)O1)[C@@H]1C[C@]2(O)[C@@](C)([C@H]3[C@@H]([C@]4(O)[C@@](C)([C@H](C5=CC(=O)OC5)CC4)CC3)CC2)CC1	Traditional Herbal Isolate=peripalloside	-7.1
7118	O([C@H]1[C@H](O)[C@H](O)[C@@H](O)[C@H](C)O1)[C@@H]1C[C@]2(O)[C@@](C)([C@H]3[C@H]([C@]4(O)[C@@](C)([C@H](C5=CC(=O)OC5)CC4)CC3)CC2)CC1	Traditional Herbal Isolate=peripalloside	-7.1
7160	O(C)[C@H]1[C@H](O)[C@H](C)O[C@H](O[C@@H]2C[C@H]3[C@](C)([C@@H]4C(=O)[C@@H](O)[C@]5(C)[C@@H](C6=CC(=O)OC6)CC[C@]5(O)[C@H]4CC3)CC2)C1	Traditional Herbal Isolate=caudoside;sarmutoside	-7.1
7161	O(C)[C@@H]1[C@@H](O)[C@H](C)O[C@H](O[C@H]2C[C@H]3[C@@](C)([C@@H]4C(=O)[C@@H](O)[C@]5(C)[C@H](C6=CC(=O)OC6)CC[C@]5(O)[C@H]4CC3)CC2)C1	Traditional Herbal Isolate=caudoside;sarmutoside	-7.1
7166	O(C)[C@H]1[C@H](O)[C@@H](C)O[C@@H](O[C@H]2C[C@@H]3[C@](C)([C@H]4C(=O)[C@H](O)[C@@]5(C)[C@H](C6=CC(=O)OC6)CC[C@]5(O)[C@@H]4CC3)CC2)C1	Traditional Herbal Isolate=caudoside;sarmutoside	-7.1
7187	O(C)[C@H]1[C@@H](O)[C@@H](C)O[C@H](O[C@@H]2C[C@@H]3[C@@](C)([C@H]4[C@H](O)C(=O)[C@@]5(C)[C@@H](C6=CC(=O)OC6)CC[C@]5(O)[C@H]4CC3)CC2)C1	Traditional Herbal Isolate=sinostroside	-7.1
7188	O(C)[C@H]1[C@@H](O)[C@H](C)O[C@H](O[C@H]2C[C@@H]3[C@@](C)([C@@H]4[C@@H](O)C(=O)[C@]5(C)[C@@H](C6=CC(=O)OC6)CC[C@]5(O)[C@H]4CC3)CC2)C1	Traditional Herbal Isolate=sinostroside	-7.1
7191	O(C)[C@@H]1[C@H](O)[C@H](C)O[C@@H](O[C@@H]2C[C@@H]3[C@](C)([C@@H]4[C@@H](O)C(=O)[C@]5(C)[C@@H](C6=CC(=O)OC6)CC[C@]5(O)[C@H]4CC3)CC2)C1	Traditional Herbal Isolate=sinostroside	-7.1
7193	O(C)[C@@H]1[C@@H](O)[C@H](C)O[C@H](O[C@H]2C[C@H]3[C@](C)([C@@H]4[C@H](O)C(=O)[C@@]5(C)[C@H](C6=CC(=O)OC6)CC[C@]5(O)[C@H]4CC3)CC2)C1	Traditional Herbal Isolate=sinostroside	-7.1
7196	O(C)[C@H]1[C@H](O)[C@H](C)O[C@H](O[C@H]2C[C@@H]3[C@@](C)([C@@H]4[C@@H](O)C(=O)[C@@]5(C)[C@H](C6=CC(=O)OC6)CC[C@]5(O)[C@@H]4CC3)CC2)C1	Traditional Herbal Isolate=sinostroside	-7.1
7224	O=C[C@]12[C@@](O)(C[C@@H](O[C@H]3[C@@H](O)[C@@H](O)[C@@H](O)[C@@H](C)O3)CC1)CC[C@@H]1[C@]3(O)[C@@](C)([C@H](C4=CC(=O)OC4)CC3)CC[C@H]21	Traditional Herbal Isolate=strophalloside	-7.1
7252	O([C@@H]1[C@H](O)[C@H](O)[C@@H](O)[C@@H](C)O1)[C@@H]1C[C@]2(O)[C@@](CO)([C@H]3[C@H]([C@]4(O)[C@@](C)([C@H](C5=CC(=O)OC5)CC4)CC3)CC2)CC1	Traditional Herbal Isolate=convallatoxol	-7.1
7255	O([C@@H]1[C@@H](O)[C@H](O)[C@@H](O)[C@@H](C)O1)[C@@H]1C[C@]2(O)[C@@](CO)([C@H]3[C@H]([C@]4(O)[C@@](C)([C@H](C5=CC(=O)OC5)CC4)CC3)CC2)CC1	Traditional Herbal Isolate=convallatoxol	-7.1
7263	O([C@H]1[C@H](O)[C@@H](O)[C@@H](O)[C@@H](C)O1)[C@@H]1C[C@]2(O)[C@@](C)([C@@H]3[C@H]([C@]4(O)[C@@](C)([C@H](O)C3)[C@H](C3=CC(=O)OC3)CC4)CC2)CC1	Traditional Herbal Isolate=alpha-antioside	-7.1
7264	O([C@H]1[C@@H](O)[C@H](O)[C@H](O)[C@H](C)O1)[C@@H]1C[C@]2(O)[C@@](C)([C@@H]3[C@H]([C@]4(O)[C@@](C)([C@H](O)C3)[C@H](C3=CC(=O)OC3)CC4)CC2)CC1	Traditional Herbal Isolate=alpha-antioside	-7.1
7268	O([C@H]1[C@H](O)[C@@H](O)[C@@H](O)[C@H](C)O1)[C@@H]1C[C@]2(O)[C@@](C)([C@H]3[C@H]([C@]4(O)[C@@](C)([C@H](O)C3)[C@H](C3=CC(=O)OC3)CC4)CC2)CC1	Traditional Herbal Isolate=alpha-antioside	-7.1
7270	O([C@H]1[C@@H](O)[C@H](O)[C@@H](O)[C@H](C)O1)[C@@H]1C[C@]2(O)[C@@](C)([C@H]3[C@H]([C@]4(O)[C@@](C)([C@H](O)C3)[C@H](C3=CC(=O)OC3)CC4)CC2)CC1	Traditional Herbal Isolate=alpha-antioside	-7.1
7272	O([C@H]1[C@@H](O)[C@@H](O)[C@H](O)[C@H](C)O1)[C@@H]1C[C@]2(O)[C@@](C)([C@H]3[C@H]([C@]4(O)[C@@](C)([C@H](O)C3)[C@H](C3=CC(=O)OC3)CC4)CC2)CC1	Traditional Herbal Isolate=alpha-antioside	-7.1
7295	O[C@H]1CC(C)(C)C(/C=C\C(=C/C=C\C(=C/C=C/C=C(\C=C\C=C(\C=C/C=2C(C)(C)CCCC=2C)/C)/C)\C)\C)=C(C)C1	Traditional Herbal Isolate=physoxanthin	-7.1
7332	O=C([O-])CCc1c(C)[cH0]=2[nH][cH0]1=Cc1c(CCC(=O)[O-])c(C)c([nH]1)C=C1C(C)=C(C=C)C(=N1)C=C1C(C)=C(C=C)C(=N1)C=2	Traditional Herbal Isolate=hemin	-7.1
7358	O=C(N[C@@]1(C(C)C)C(=O)N2[C@H](C(C)C)C(=O)N3[C@H]([C@]2(O)O1)CCC3)[C@H]1C[N+@H](C)[C@@H]2[C@H](c3c4c([nH]cc4C2)ccc3)C1	NPC Approved Name=dihydroergocornine	-7.1
7395	O[C@H]1C2Oc3c(O)c(-c4c(O)c5OC6[C@@H](O)C=C[C@@H]7[C@H]8[N+@@H](C)CCC67c5c(c4)C8)cc4c3C32[C@H]([C@H]([N+@@H](C)CC3)C4)C=C1	Traditional Herbal Isolate=pseudomorphine	-7.1
7397	O[C@H]1C2Oc3c(O)c(-c4c(O)c5OC6[C@@H](O)C=C[C@H]7[C@H]8[N+@H](C)CCC67c5c(c4)C8)cc4c3C32[C@H]([C@H]([N+@@H](C)CC3)C4)C=C1	Traditional Herbal Isolate=pseudomorphine	-7.1
7399	O[C@H]1C2Oc3c(O)c(-c4c(O)c5OC6[C@@H](O)C=C[C@H]7[C@H]8[N+@H](C)CCC67c5c(c4)C8)cc4c3C32[C@@H]([C@H]([N+@@H](C)CC3)C4)C=C1	Traditional Herbal Isolate=pseudomorphine	-7.1
7416	O=C(O[C@H]1[C@@]2(O)O[C@@H]3[C@H](O[C@@H]2O[C@@H](C)C1)C[C@@H]1[C@@](C=O)([C@H]2[C@H]([C@]4(O)[C@](C)([C@H](C5=CC(=O)OC5)CC4)CC2)CC1)C3)C	Traditional Herbal Isolate=asclepiadin;asclepin	-7.1
7420	O=C(O[C@@H]1[C@@]2(O)O[C@H]3[C@H](O[C@@H]2O[C@@H](C)C1)C[C@H]1[C@](C=O)([C@@H]2[C@@H]([C@]4(O)[C@](C)([C@@H](C5=CC(=O)OC5)CC4)CC2)CC1)C3)C	Traditional Herbal Isolate=asclepiadin;asclepin	-7.1
7463	O=C(N[C@@]1(C(C)C)C(=O)N2[C@@H](CC(C)C)C(=O)N3[C@H]([C@@]2(O)O1)CCC3)[C@H]1C[N+@@H](C)[C@H]2[C@H](c3c4c([nH]cc4C2)ccc3)C1	NPC Approved Name=dihydro-alpha-ergocryptine	-7.1
7513	O[C@H]1C=C(C)[C@@H](/C=C/C(=C\C=C\C(=C/C=C/C=C(\C=C\C=C(\C)/[C@H]2O[C@@]3(C)C(C(C)(C)C[C@H](O)C3)=C2)/C)\C)/C)C(C)(C)C1	Traditional Herbal Isolate=chrysanthemaxanthin	-7.1
7525	O[C@H]1C=C(C)[C@H](/C=C/C(=C/C=C\C(=C/C=C/C=C(\C=C/C=C(/C=C/[C@]23C(C)(C)C[C@@H](O)C[C@]2(C)O3)\C)/C)\C)/C)C(C)(C)C1	Traditional Herbal Isolate=taraxanthin	-7.1
7539	O=C(/C=C/C(=C\C=C\C(=C/C=C/C=C(\C=C\C=C(/C=C/C=1C(C)(C)C[C@@H](O)CC=1C)\C)/C)\C)/C)[C@]1(C)C(C)(C)C[C@H](O)C1	Indian Approved Name=capsicum oleoresin;oleoresin capsicum	-7.1
7550	O=C([O-])C[C@H]1C(=O)N[C@H](Cc2ccccc2)C(=O)N(C)[C@H](C(C)C)C(=O)N[C@@H](CCC/[N+H]=C(\N)/N)C(=O)NCC(=O)N1	NPC Approved Name=cilengitide	-7.1
7560	O([C@@H]1[C@H](O)[C@H](Oc2c(OC)c([O-])c3C(=O)C=C(c4ccccc4)Oc3c2)O[C@@H](C)[C@H]1O)[C@H]1[C@H](O)[C@H](O)[C@H](O)[C@@H](CO)O1	Traditional Herbal Isolate=7-methoxy-baicalein	-7.1
7563	O([C@H]1[C@H](O)[C@H](Oc2c(OC)c([O-])c3C(=O)C=C(c4ccccc4)Oc3c2)O[C@H](C)[C@H]1O)[C@H]1[C@H](O)[C@H](O)[C@H](O)[C@@H](CO)O1	Traditional Herbal Isolate=7-methoxy-baicalein	-7.1
7570	O([C@H]1[C@H](O)[C@H](Oc2c(OC)c([O-])c3C(=O)C=C(c4ccccc4)Oc3c2)O[C@@H](C)[C@H]1O)[C@H]1[C@H](O)[C@H](O)[C@H](O)[C@H](CO)O1	Traditional Herbal Isolate=7-methoxy-baicalein	-7.1
7576	O=C(N[C@@]1(C(C)C)C(=O)N2[C@@H](C(CC)(C)C)C(=O)N3[C@H]([C@]2(O)O1)CCC3)[C@H]1C[N+@@H](C)[C@@H]2[C@@H](c3c4c([nH]cc4C2)ccc3)C1	FDA Approved Drug=ERGOLOID MESYLATES	-7.1
7577	O=C(N[C@@]1(C(C)C)C(=O)N2[C@@H](C(CC)(C)C)C(=O)N3[C@@H]([C@]2(O)O1)CCC3)[C@H]1C[N+@@H](C)[C@@H]2[C@@H](c3c4c([nH]cc4C2)ccc3)C1	FDA Approved Drug=ERGOLOID MESYLATES	-7.1
7618	O(C)c1c2Oc3c4OCOc4cc4c3[C@H]([N+@H](C)CC4)Cc3ccc(Oc4c(O)ccc(c4)C[C@H]4[N+@@H](C)CCc(c4c2)c1)cc3	Traditional Herbal Isolate=cepharanoline	-7.1
7619	O(C)c1c2Oc3c4OCOc4cc4c3[C@H]([N+@@H](C)CC4)Cc3ccc(Oc4c(O)ccc(c4)C[C@H]4[N+@H](C)CCc(c4c2)c1)cc3	Traditional Herbal Isolate=cepharanoline	-7.1
7620	O(C)c1c2Oc3c4OCOc4cc4c3[C@H]([N+@@H](C)CC4)Cc3ccc(Oc4c(O)ccc(c4)C[C@H]4[N+@@H](C)CCc(c4c2)c1)cc3	Traditional Herbal Isolate=cepharanoline	-7.1
7670	O([C@@H](C)[C@@]1(O)[C@]2(C)[C@@H](OC(=O)c3ccccc3)C[C@@H]3[C@](O)([C@H](O)C=C4[C@]3(C)CC[C@@H](O)C4)[C@@]2(O)CC1)C(=O)c1ccccc1	Traditional Herbal Isolate=dibenzoylgagaimol	-7.1
7676	Clc1c(OC)cc2cc1N(C)C(=O)C[C@@H](OC(=O)C)[C@@]1(C)O[C@H]1[C@@H](C)C1OC(=O)NC(O)([C@H](OC)/C=C/C=C(/C)\C2)C1	Traditional Herbal Isolate=maytanacine	-7.1
7692	O(C)c1c([C@H]2[C@H](O)[C@@H](O)[C@H](O)[C@H](CO)O2)c([O-])c2C(=O)C=C(c3ccc(O[C@H]4[C@H](O)[C@H](O)[C@H](O)[C@H](CO)O4)cc3)Oc2c1	Traditional Herbal Isolate=flavocommelitin	-7.1
7700	O(C)c1c([C@H]2[C@H](O)[C@@H](O)[C@H](O)[C@@H](CO)O2)c([O-])c2C(=O)C=C(c3ccc(O[C@H]4[C@H](O)[C@H](O)[C@H](O)[C@H](CO)O4)cc3)Oc2c1	Traditional Herbal Isolate=flavocommelitin	-7.1
7706	O(C)c1c(OC)cc2c3[C@@H]([N+@@H](C)CC2)Cc2ccc(Oc4c(O)ccc(c4)C=4C(=O)c5c(cc(OC)c(Oc13)c5)CCN=4)cc2	Traditional Herbal Isolate=stepinonine	-7.1
7713	O(C)c1c2Oc3c4OCOc4cc4c3[C@H]([N+@H](C)CC4)Cc3ccc(Oc4c(OC)ccc(c4)C[C@H]4[N+@H](C)CCc(c4c2)c1)cc3	Traditional Herbal Isolate=cepharanthine	-7.1
7716	O(C)c1c2Oc3c4OCOc4cc4c3[C@H]([N+@@H](C)CC4)Cc3ccc(Oc4c(OC)ccc(c4)C[C@H]4[N+@@H](C)CCc(c4c2)c1)cc3	Traditional Herbal Isolate=cepharanthine	-7.1
7728	O(C)c1c(O)c2Oc3c(OC)cc4c([C@@H]([N+@@H](C)CC4)Cc4ccc(Oc5c(OC)ccc(c5)C[C@H]5[N+@@H](C)CCc(c25)c1)cc4)c3	Traditional Herbal Isolate=fangchinoline	-7.1
7750	O(C)c1c(O)c2Oc3ccc(cc3)C[C@@H]3[N+@@H](C)CCc4c3cc(c(OC)c4)Oc3c(OC)ccc(c3)C[C@H]3[N+@H](C)CCc(c23)c1	Traditional Herbal Isolate=hayatinine	-7.1
7820	O=C(N[C@@H]1[C@@H](O)Cc2c1cccc2)[C@H](C[C@@H](O)C[N+@@H]1[C@H](C(=O)NC(C)(C)C)CN(Cc2cnccc2)CC1)Cc1ccccc1	China Approved Name=indinavir Indian Approved Name=indinavir WHO Essential Medicine=indinavir Australia Approved Name=INDINAVIR SULFATE FDA Approved Drug=INDINAVIR SULFATE	-7.1
7831	O=C(O[C@H]1C(C)(C)[C@@H]2[C@](C)([C@@H]3[C@](C)([C@@]4(C)C([C@@H]5[C@H](C)[C@H](CO)CC[C@]5(C(=O)[O-])CC4)=CC3)CC2)CC1)/C=C/c1ccc(O)cc1	Traditional Herbal Isolate=rubicoumaric acid	-7.1
7883	O(C)c1c(OC)cc2c([C@H](Cc3cc(Oc4ccc(C[C@H]5[N+@@H](C)CCc6c5cc(OC)c(OC)c6)cc4)c(O)cc3)[N+@H](C)CC2)c1	Traditional Herbal Isolate=dauricine	-7.1
7995	O(C)c1c(-c2c(OC)cc(O)c3c2C[C@H]2[N+@@H](C)CCC43[C@@H]2C=C(OC)C(=O)C4)c2c(c(O)c1)C13[C@H]([C@@H]([N+@@H](C)CC1)C2)C=C(OC)C(=O)C3	Traditional Herbal Isolate=disinomenine	-7.1
8009	O([C@H]1[C@@H](O)[C@H](O)[C@H](O)[C@H](CO)O1)c1c(C/C=C(\C)/C)c2OC(c3ccc(O)cc3)=C(O[C@H]3[C@H](O)[C@H](O)[C@H](O)[C@@H](C)O3)C(=O)c2c([O-])c1	Traditional Herbal Isolate=epimedoside a	-7.1
8025	O=C([O-])[C@@H]1[C@H](O)C[C@]2(O)O[C@H]1C[C@@H](O[C@H]1[C@H](O)[C@H]([N+H3])[C@H](O)[C@H](C)O1)/C=C/C=C/C=C/C=C/C[C@H](C)OC(=O)/C=C/[C@H]1O[C@@H]1C[C@@H](O)C2	Indian Approved Name=natamycin FDA Approved Drug=NATAMYCIN	-7.1
8060	O=C1[C@@H]([C@@H](O)CCCCC)[C@H](O)C[C@H](O)C[C@@H](O)C[C@@H](O)C[C@@H](O)C[C@H](O)[C@@H](O)[C@H](O)/C(/C)=C\C=C\C=C\C=C\C=C\[C@H](O)[C@H](C)O1	NPC Approved Name=fungichromin	-7.1
8135	O(C[C@H]1[C@H](O)[C@H](O)[C@H](O)[C@H](O[C@@H]2C[C@]3(O)[C@@](CO)([C@H]4[C@H]([C@]5(O)[C@@](C)([C@H](C6=CC(=O)OC6)CC5)CC4)CC3)CC2)O1)[C@@H]1[C@@H](C)O[C@H](O)C[C@H]1O	Traditional Herbal Isolate=erysimosol	-7.1
8160	FC(F)(F)C(=O)N[C@H]1[C@H](O)[C@@H](C)O[C@@H](O[C@@H]2c3c([O-])c4C(=O)c5c(OC)cccc5C(=O)c4c([O-])c3C[C@@](O)(C(=O)COC(=O)CCCC)C2)C1	FDA Approved Drug=VALRUBICIN	-7.1
8161	FC(F)(F)C(=O)N[C@@H]1[C@@H](O)[C@@H](C)O[C@H](O[C@@H]2c3c([O-])c4C(=O)c5c(OC)cccc5C(=O)c4c([O-])c3C[C@@](O)(C(=O)COC(=O)CCCC)C2)C1	FDA Approved Drug=VALRUBICIN	-7.1
8170	FC(F)(F)C(=O)N[C@@H]1[C@@H](O)[C@H](C)O[C@@H](O[C@@H]2c3c([O-])c4C(=O)c5c(OC)cccc5C(=O)c4c([O-])c3C[C@@](O)(C(=O)COC(=O)CCCC)C2)C1	FDA Approved Drug=VALRUBICIN	-7.1
8185	O=C([O-])[C@@H]1[C@H](O)[C@@H](O)[C@@H](O)[C@H](O[C@H]2[C@H](O)[C@@H](O)[C@H](CO)O[C@H]2Oc2c(O)cc3/[N+](=C\C=C\4/C=C(C(=O)[O-])[N+H2][C@@H](C(=O)[O-])C/4)/[C@@H](C(=O)[O-])Cc3c2)O1	Traditional Herbal Isolate=iso-amaranthin	-7.1
8188	O=C([O-])[C@@H]1[C@H](O)[C@@H](O)[C@H](O)[C@H](O[C@H]2[C@H](O)[C@H](O)[C@H](CO)O[C@H]2Oc2c(O)cc3/[N+](=C\C=C\4/C=C(C(=O)[O-])[N+H2][C@@H](C(=O)[O-])C/4)/[C@@H](C(=O)[O-])Cc3c2)O1	Traditional Herbal Isolate=iso-amaranthin	-7.1
8190	O=C[C@@]12[C@](O)(C[C@@H](O[C@H]3[C@H](O)[C@H](O)[C@@H](O[C@H]4[C@@H](O)[C@H](O)[C@H](O)[C@@H](CO)O4)[C@H](C)O3)CC1)CC[C@H]1[C@]3(O)[C@@](C)([C@@H](C4=COC(=O)C=C4)CC3)CC[C@H]21	Traditional Herbal Isolate=hellebrin	-7.1
8192	O=C[C@@]12[C@@](O)(C[C@@H](O[C@H]3[C@@H](O)[C@H](O)[C@@H](O[C@H]4[C@@H](O)[C@@H](O)[C@H](O)[C@@H](CO)O4)[C@@H](C)O3)CC1)CC[C@@H]1[C@]3(O)[C@@](C)([C@H](C4=COC(=O)C=C4)CC3)CC[C@H]21	Traditional Herbal Isolate=hellebrin	-7.1
8197	O=C[C@@]12[C@](O)(C[C@@H](O[C@@H]3[C@@H](O)[C@@H](O)[C@@H](O[C@H]4[C@@H](O)[C@@H](O)[C@H](O)[C@@H](CO)O4)[C@@H](C)O3)CC1)CC[C@H]1[C@@]3(O)[C@@](C)([C@@H](C4=COC(=O)C=C4)CC3)CC[C@@H]21	Traditional Herbal Isolate=hellebrin	-7.1
8201	O=C[C@]12[C@@](O)(C[C@@H](O[C@@H]3[C@H](O)[C@@H](O)[C@H](O[C@@H]4[C@H](O)[C@@H](O)[C@@H](O)[C@@H](CO)O4)[C@@H](C)O3)CC1)CC[C@@H]1[C@@]3(O)[C@@](C)([C@@H](C4=COC(=O)C=C4)CC3)CC[C@@H]21	Traditional Herbal Isolate=hellebrin	-7.1
8227	Clc1c(OC)cc2cc1N(C)C(=O)C[C@H](OC(=O)[C@H](N(C(=O)CC(C)C)C)C)[C@]1(C)O[C@@H]1[C@H](C)C1OC(=O)NC(O)([C@H](OC)/C=C/C=C(/C)\C2)C1	Traditional Herbal Isolate=maytanvaline	-7.1
8298	P(=O)(OP(=O)(OP(=O)(OC[C@H]1[C@@H](O)C[C@@H](N2C(=O)N=C(N)C=C2)O1)[O-])[O-])(OP(=O)(OC[C@H]1[C@H](O)[C@@H](O)[C@H](N2C(=O)NC(=O)C=C2)O1)[O-])[O-]	NPC Approved Name=denufosol [inn]	-7.1
8300	P(=O)(OP(=O)(OP(=O)(OC[C@H]1[C@@H](O)C[C@@H](N2C(=O)N=C(N)C=C2)O1)[O-])[O-])(OP(=O)(OC[C@H]1[C@H](O)[C@@H](O)[C@H](N2C(=O)NC(=O)C=C2)O1)[O-])[O-]	NPC Approved Name=denufosol [inn]	-7.1
8337	O([C@H]1[C@@H](O)[C@@H](O)[C@H](O)[C@@H](CO)O1)[C@H]1[C@@H]([C@@H](CC/C=C(\C)/C)C)[C@]2(C)[C@](C)([C@@H]3[C@]4([C@@]5(C(C(C)(C)[C@@H](O[C@H]6[C@H](O)[C@@H](O)[C@@H](O)[C@H](CO)O6)CC5)C(=O)C3)C4)CC2)C1	Traditional Herbal Isolate=diadzin-4 7-diglucoside	-7.1
8403	O=CO[C@@H]1[C@@H]([C@]2(C)[C@@](O)([C@@H]3[C@H]([C@]4(C)[C@H](C[C@@H](O[C@@H]5O[C@H](C)[C@H](O[C@H]6O[C@@H](C)[C@H](O[C@H]7O[C@@H](C)[C@H](O)[C@H](O)C7)[C@@H](O)C6)[C@H](O)C5)CC4)CC3)CC2)C1)C1=CC(=O)OC1	Traditional Herbal Isolate=gitaloxin	-7.1
8404	O=CO[C@H]1[C@H]([C@@]2(C)[C@@](O)([C@@H]3[C@H]([C@]4(C)[C@@H](C[C@H](O[C@H]5O[C@H](C)[C@H](O[C@H]6O[C@@H](C)[C@H](O[C@H]7O[C@H](C)[C@H](O)[C@@H](O)C7)[C@@H](O)C6)[C@@H](O)C5)CC4)CC3)CC2)C1)C1=CC(=O)OC1	Traditional Herbal Isolate=gitaloxin	-7.1
8406	O=CO[C@@H]1[C@H]([C@]2(C)[C@@](O)([C@H]3[C@H]([C@@]4(C)[C@H](C[C@@H](O[C@H]5O[C@H](C)[C@H](O[C@H]6O[C@H](C)[C@@H](O[C@@H]7O[C@@H](C)[C@@H](O)[C@@H](O)C7)[C@@H](O)C6)[C@H](O)C5)CC4)CC3)CC2)C1)C1=CC(=O)OC1	Traditional Herbal Isolate=gitaloxin	-7.1
8412	O=CO[C@@H]1[C@H]([C@]2(C)[C@](O)([C@H]3[C@H]([C@]4(C)[C@H](C[C@@H](O[C@@H]5O[C@H](C)[C@H](O[C@H]6O[C@H](C)[C@H](O[C@H]7O[C@H](C)[C@H](O)[C@H](O)C7)[C@H](O)C6)[C@H](O)C5)CC4)CC3)CC2)C1)C1=CC(=O)OC1	Traditional Herbal Isolate=gitaloxin	-7.1
8413	O=CO[C@@H]1[C@H]([C@@]2(C)[C@@](O)([C@@H]3[C@@H]([C@]4(C)[C@H](C[C@@H](O[C@H]5O[C@H](C)[C@H](O[C@H]6O[C@H](C)[C@H](O[C@@H]7O[C@H](C)[C@H](O)[C@H](O)C7)[C@H](O)C6)[C@@H](O)C5)CC4)CC3)CC2)C1)C1=CC(=O)OC1	Traditional Herbal Isolate=gitaloxin	-7.1
8416	O=CO[C@H]1[C@@H]([C@]2(C)[C@@](O)([C@@H]3[C@@H]([C@@]4(C)[C@@H](C[C@H](O[C@H]5O[C@@H](C)[C@H](O[C@@H]6O[C@H](C)[C@@H](O[C@@H]7O[C@H](C)[C@H](O)[C@H](O)C7)[C@H](O)C6)[C@@H](O)C5)CC4)CC3)CC2)C1)C1=CC(=O)OC1	Traditional Herbal Isolate=gitaloxin	-7.1
8463	O(C)[C@H]1[C@H](O)[C@H](O[C@@H]2[C@@H](C)O[C@@H](O[C@H]3[C@H](C)O[C@@H](O[C@@H]4C[C@@H]5[C@@](C)([C@H]6[C@](O)([C@@]7(O)[C@](C)([C@H](O)C6)[C@@](O)([C@@H](O)C)CC7)CC5)CC4)C[C@H]3OC)C[C@@H]2OC)O[C@H](C)[C@H]1O	Traditional Herbal Isolate=tenacissoside a	-7.1
8538	O([C@@H]1[C@H](O[C@H]2[C@@H](O)[C@H](O)[C@@H](O)[C@H](C)O2)[C@H](O[C@@H]2CC=3[C@](C)([C@H]4[C@H]([C@@H]5[C@](C)([C@@H]6[C@@H](C)[C@H]7[N+H]([C@@H]6C5)C[C@@H](C)CC7)CC4)CC=3)CC2)O[C@@H](CO)[C@@H]1O)[C@H]1[C@@H](O)[C@@H](O)[C@@H](O)[C@H](CO)O1	Traditional Herbal Isolate=solanine	-7.1
8551	O=C([O-])[C@]12[C@H](C=3[C@@](C)([C@@]4(C)[C@@H]([C@]5(C)[C@H](C(C)(C)[C@@H](O[C@H]6[C@@H](O[C@@H]7[C@@H](O[C@@H]8[C@@H](O)[C@H](O)[C@H](O)[C@@H](C)O8)[C@H](O)[C@@H](O)[C@H](CO)O7)[C@@H](O)[C@@H](O)CO6)CC5)CC4)CC=3)CC1)CC(C)(C)CC2	Traditional Herbal Isolate=raddeanin a	-7.1
8559	O=C([O-])[C@]12[C@H](C=3[C@](C)([C@@]4(C)[C@H]([C@]5(C)[C@@H](C(C)(C)[C@H](O[C@H]6[C@@H](O[C@@H]7[C@@H](O[C@@H]8[C@@H](O)[C@@H](O)[C@@H](O)[C@@H](C)O8)[C@H](O)[C@H](O)[C@@H](CO)O7)[C@@H](O)[C@H](O)CO6)CC5)CC4)CC=3)CC1)CC(C)(C)CC2	Traditional Herbal Isolate=raddeanin a	-7.1
8603	O=C([O-])[C@H]1[C@H](O)C[C@@H](O[C@H]2[C@@H](O)[C@@H]([N+H3])[C@@H](O)[C@H](C)O2)/C=C/C=C/C=C/C=C/CC/C=C/C=C/[C@@H](C)[C@@H](O)[C@H](C)[C@@H](C)OC(=O)C[C@H](O)C[C@H](O)C[C@H](O)CC[C@@H](O)[C@H](O)CC(=O)C[C@@H]1O	China Approved Name=nystatin;Nystatin WHO Essential Medicine=nystatin Australia Approved Name=NYSTATIN FDA Approved Drug=NYSTATIN	-7.1
8610	O=C([O-])[C@H]1[C@H](O)C[C@H](O[C@@H]2[C@@H](O)[C@@H]([N+H3])[C@@H](O)[C@H](C)O2)/C=C/C=C/C=C/C=C/CC/C=C/C=C/[C@H](C)[C@H](O)[C@@H](C)[C@@H](C)OC(=O)C[C@@H](O)C[C@H](O)C[C@@H](O)CC[C@@H](O)[C@H](O)CC(=O)C[C@@H]1O	China Approved Name=nystatin;Nystatin WHO Essential Medicine=nystatin Australia Approved Name=NYSTATIN FDA Approved Drug=NYSTATIN	-7.1
8636	S(C(=O)/C=C/c1cc(OC)c(O)cc1)CCNC(=O)CCNC(=O)[C@@H](O)C(COP(=O)(OP(=O)(OC[C@H]1[C@H](OP(=O)([O-])[O-])[C@@H](O)[C@@H](n2c3ncnc(N)c3nc2)O1)[O-])[O-])(C)C	Traditional Herbal Isolate=feruloyl-p-coumaroylmethane	-7.1
8641	O=C([O-])C[C@@H]1C(=O)O[C@@H]2[C@H]3OC(=O)c4c(c(O)c(O)c(O)c4)-c4c(O)c(O)c(O)cc4C(=O)OC[C@H]2O[C@@H](OC(=O)c2cc(O)c(O)c(O)c2)[C@H]3OC(=O)c2c3[C@@H]1[C@@H](O)C(=O)Oc3c(O)c(O)c2	Traditional Herbal Isolate=chebulagic acid	-7.1
8693	O=C(NCC(=O)N)[C@H](NC(=O)[C@@H]1N(C(=O)[C@H]2NC(=O)[C@H](CC(=O)N)NC(=O)[C@H]([C@@H](O)C)NC(=O)[C@H]([C@H](CC)C)NC(=O)[C@@H](Cc3ccc(O)cc3)NC(=O)[C@@H]([N+H3])CSSC2)CCC1)CC(C)C	Indian Approved Name=urofollitrophin FDA Approved Drug=UROFOLLITROPIN	-7.1
8699	O=C(NCC(=O)N)[C@@H](NC(=O)[C@H]1N(C(=O)[C@@H]2NC(=O)[C@@H](CC(=O)N)NC(=O)[C@H]([C@H](O)C)NC(=O)[C@H]([C@@H](CC)C)NC(=O)[C@H](Cc3ccc(O)cc3)NC(=O)[C@@H]([N+H3])CSSC2)CCC1)CC(C)C	Indian Approved Name=urofollitrophin FDA Approved Drug=UROFOLLITROPIN	-7.1
8700	O=C(NCC(=O)N)[C@H](NC(=O)[C@H]1N(C(=O)[C@H]2NC(=O)[C@H](CC(=O)N)NC(=O)[C@@H]([C@H](O)C)NC(=O)[C@H]([C@@H](CC)C)NC(=O)[C@@H](Cc3ccc(O)cc3)NC(=O)[C@@H]([N+H3])CSSC2)CCC1)CC(C)C	Indian Approved Name=urofollitrophin FDA Approved Drug=UROFOLLITROPIN	-7.1
8702	O=C(NCC(=O)N)[C@H](NC(=O)[C@H]1N(C(=O)[C@H]2NC(=O)[C@@H](CC(=O)N)NC(=O)[C@H]([C@H](O)C)NC(=O)[C@H]([C@H](CC)C)NC(=O)[C@@H](Cc3ccc(O)cc3)NC(=O)[C@H]([N+H3])CSSC2)CCC1)CC(C)C	Indian Approved Name=urofollitrophin FDA Approved Drug=UROFOLLITROPIN	-7.1
8723	O=C(N[C@H]1C(=O)N[C@@H](Cc2ccccc2)C(=O)N[C@H](Cc2c3c([nH]c2)cccc3)C(=O)N[C@H](CCCC[N+H3])C(=O)N[C@@H]([C@H](O)C)C(=O)N[C@H](C(=O)N[C@H]([C@@H](O)C)CO)CSSC1)[C@H]([N+H3])Cc1ccccc1	Indian Approved Name=octreotide FDA Approved Drug=OCTREOTIDE ACETATE	-7.1
8734	O=C(O[C@H]1[C@@H](OC)C[C@H](C[C@@H](C)[C@@H]2OC(=O)[C@H]3N(C(=O)C(=O)[C@]4(O)[C@H](C)CCC(O4)C[C@@H](OC)/C(/C)=C\C=C\C=C\[C@@H](C)C[C@H](C)C(=O)[C@H](OC)[C@@H](O)/C(/C)=C\[C@@H](C)C(=O)C2)CCCC3)CC1)C(CO)(CO)C	FDA Approved Drug=TEMSIROLIMUS	-7.1
8782	O=C(NCC(=O)N)[C@@H](NC(=O)[C@@H]1N(C(=O)[C@H]2NC(=O)[C@H](CC(=O)N)NC(=O)[C@H](CCC(=O)N)NC(=O)[C@@H](Cc3ccccc3)NC(=O)[C@H](Cc3ccc(O)cc3)NC(=O)[C@@H]([N+H3])CSSC2)CCC1)CCC/[N+H]=C(\N)/N	FDA Approved Drug=VASOPRESSIN TANNATE	-7.1
8786	O=C(NCC(=O)N)[C@@H](NC(=O)[C@@H]1N(C(=O)[C@@H]2NC(=O)[C@@H](CC(=O)N)NC(=O)[C@@H](CCC(=O)N)NC(=O)[C@H](Cc3ccccc3)NC(=O)[C@@H](Cc3ccc(O)cc3)NC(=O)[C@@H]([N+H3])CSSC2)CCC1)CCC/[N+H]=C(\N)/N	FDA Approved Drug=VASOPRESSIN TANNATE	-7.1
8790	O=C(NCC(=O)N)[C@@H](NC(=O)[C@H]1N(C(=O)[C@H]2NC(=O)[C@@H](CC(=O)N)NC(=O)[C@H](CCC(=O)N)NC(=O)[C@H](Cc3ccccc3)NC(=O)[C@@H](Cc3ccc(O)cc3)NC(=O)[C@H]([N+H3])CSSC2)CCC1)CCC/[N+H]=C(\N)/N	FDA Approved Drug=VASOPRESSIN TANNATE	-7.1
8808	O=C([O-])[C@H]1[C@H](O)CC2(O)OC1C[C@H](O[C@H]1[C@@H](O)[C@@H]([N+H3])[C@@H](O)[C@H](C)O1)C=CC=CC=CC=CC=CC=CC=C[C@H](C)[C@H]([C@@H](C[C@H]([C@@H](O)CC(=O)c1ccc(N)cc1)C)C)OC(=O)CC(=O)CCCC(=O)C[C@H](O)C[C@@H](O)C[C@@H](O)C2	FDA Approved Drug=CANDICIDIN	-7.1
8903	O(C[C@H]1[C@@H](O)[C@@H](O)[C@H](O[C@H]2[C@@H](O)[C@H](O)[C@@H](O)CO2)[C@H](O[C@H]2[C@@H](O[C@H]3[C@H](O)[C@H](O)[C@H](O)[C@@H](C)O3)[C@@H](O[C@@H]3C(C)(C)[C@@H]4[C@@](C)([C@H]5[C@](C)(C67[C@@H]([C@H]8[C@@](O)(C)C[C@H](/C=C(\C)/C)O[C@]8(OC6)C7)CC5)CC4)CC3)OC[C@H]2O)O1)[C@H]1[C@@H](O)[C@H](O)[C@H](O)[C@H](CO)O1	Traditional Herbal Isolate=jujuboside a	-7.1
8931	O=C(N[C@@H]1[C@H](C)OC(=O)[C@H](C(C)C)N(C)C(=O)CN(C)C(=O)[C@H]2N(C(=O)[C@@H](C(C)C)NC1=O)CCC2)c1c2N=C3C(C(=O)N[C@@H]4[C@H](C)OC(=O)[C@@H](C(C)C)N(C)C(=O)CN(C)C(=O)[C@@H]5N(C(=O)[C@@H](C(C)C)NC4=O)CCC5)=C(N)C(=O)C(C)=C3Oc2c(C)cc1	China Approved Name=actinomycin WHO Essential Medicine=dactinomycin Indian Approved Name=dactinomycin FDA Approved Drug=DACTINOMYCIN	-7.1
8933	O=C(N[C@H]1[C@H](C)OC(=O)[C@H](C(C)C)N(C)C(=O)CN(C)C(=O)[C@H]2N(C(=O)[C@@H](C(C)C)NC1=O)CCC2)c1c2N=C3C(C(=O)N[C@H]4[C@@H](C)OC(=O)[C@@H](C(C)C)N(C)C(=O)CN(C)C(=O)[C@H]5N(C(=O)[C@H](C(C)C)NC4=O)CCC5)=C(N)C(=O)C(C)=C3Oc2c(C)cc1	China Approved Name=actinomycin WHO Essential Medicine=dactinomycin Indian Approved Name=dactinomycin FDA Approved Drug=DACTINOMYCIN	-7.1
8937	O=C(N[C@@H]1[C@H](C)OC(=O)[C@@H](C(C)C)N(C)C(=O)CN(C)C(=O)[C@H]2N(C(=O)[C@H](C(C)C)NC1=O)CCC2)c1c2N=C3C(C(=O)N[C@@H]4[C@@H](C)OC(=O)[C@H](C(C)C)N(C)C(=O)CN(C)C(=O)[C@@H]5N(C(=O)[C@@H](C(C)C)NC4=O)CCC5)=C(N)C(=O)C(C)=C3Oc2c(C)cc1	China Approved Name=actinomycin WHO Essential Medicine=dactinomycin Indian Approved Name=dactinomycin FDA Approved Drug=DACTINOMYCIN	-7.1
8993	O=C(N[C@H](C(=O)N[C@H](C(=O)N[C@@H](C(=O)N[C@@H](C(=O)N1[C@@H](C(=O)NCC(=O)N)CCC1)CCCNC(=[N+H2])N)CC(C)C)Cc1cc2c(cc1)cccc2)Cc1ccc(O)cc1)[C@@H](NC(=O)[C@H](NC(=O)[C@@H](NC(=O)[C@H]1NC(=O)CC1)Cc1nc[nH]c1)Cc1c2c([nH]c1)cccc2)CO	Indian Approved Name=nafarelin FDA Approved Drug=NAFARELIN ACETATE	-7.1
8999	O=C(N[C@@H](C(=O)N[C@@H](C(=O)N[C@H](C(=O)N[C@@H](C(=O)N1[C@@H](C(=O)NCC(=O)N)CCC1)CCCNC(=[N+H2])N)CC(C)C)Cc1cc2c(cc1)cccc2)Cc1ccc(O)cc1)[C@@H](NC(=O)[C@@H](NC(=O)[C@H](NC(=O)[C@@H]1NC(=O)CC1)Cc1nc[nH]c1)Cc1c2c([nH]c1)cccc2)CO	Indian Approved Name=nafarelin FDA Approved Drug=NAFARELIN ACETATE	-7.1
3172	Clc1cc2C(c3ccccc3)=N[C@H](C(=O)[O-])C(=O)Nc2cc1	US Illegal/Scheduled Drug (Schedule 4)=Clorazepate FDA Approved Drug=CLORAZEPATE DIPOTASSIUM	-7.0
3339	O=C(c1c2c([nH]c1)ncc(-c1cc(N)ccc1)c2)C1=NO[C@H](C)C1	Indian Approved Name=methyl polysilox;methyl salicyalate	-7.0
3718	O(C)c1c2OCOc2c-2c3[C@H]([N+H2]CCc13)Cc1c-2cc2OCOc2c1	Traditional Herbal Isolate=cassythidine	-7.0
3824	Oc1c2[C@@H]3OCC45[C@@H]3[C@](C)(Oc2cc(C)c1)CCC4C(C)(C)CCC5	NPC Approved Name=siccanin	-7.0
3895	[N+H](C)(C)[C@H]1CC=2[C@@](C)([C@H]3[C@H]([C@H]4[C@]5([C@H]([C@@H](C)[N+H2]C5)CC4)CC3)CC=2)CC1	Traditional Herbal Isolate=conessimine	-7.0
4013	O=C(Oc1cc2c(cc(C(=[N+H2])N)cc2)cc1)c1ccc(/[N+H]=C(\N)/N)cc1	NPC Approved Name=nafamostat	-7.0
4114	[C@H]1(c2cc3OCOc3cc2)OC[C@H]2[C@@H](c3cc4OCOc4cc3)OC[C@@H]12	Traditional Herbal Isolate=asarinine	-7.0
4142	O=C([O-])CCNC(=O)c1ccc(N=Nc2cc(C(=O)[O-])c(O)cc2)cc1	Indian Approved Name=balsalazide	-7.0
4261	O=C(CO)[C@@]1(O)[C@]2(C)[C@H]([C@H]3[C@@H](C(=O)C2)[C@]2(C)C(=CC(=O)CC2)CC3)CC1	China Approved Name=cortisone	-7.0
4316	O=C(C[N+@H]1[C@@H]2[C@@H]3C(c4c(ccc(O)c4)C2)(CC1)CCCC3)c1ccccc1	US Illegal/Scheduled Drug (Schedule 1)=Levophenacylmorphan	-7.0
4408	O(C)c1cc2c(N3C(=O)C[C@H]4OCC=C5[C@@H]6[C@H]4[C@@H]3C32[C@@H]([N+H](C5)CC3)C6)cc1	Traditional Herbal Isolate=beta- colubrine	-7.0
4536	Clc1ccc(C(=O)N[C@@H](C(=O)[O-])CC=2c3c(NC(=O)C=2)cccc3)cc1	Indian Approved Name=rebamipide	-7.0
4558	O[C@H]1O[C@H]2[C@@H]([N+@H](C)CCc3c2cc2OCOc2c3)c2c1c1OCOc1cc2	Traditional Herbal Isolate=rhoeagenine	-7.0
4613	S(=O)(=O)(Nc1c(Oc2ccccc2)cc2C(=O)C(NC=O)=COc2c1)C	NPC Approved Name=iguratimod	-7.0
4665	S(=O)(=O)([O-])c1c2c(C(=O)/C(=N/Nc3c4c(ccc3)cccc4)/C=C2)ccc1	Indian Approved Name=cepae ext	-7.0
4988	O=C(O[C@H]1CC=2[C@@](C)([C@@H]3[C@@H]([C@@H]4[C@@](C)(C(c5cnccc5)=CC4)CC3)CC=2)CC1)C	FDA Approved Drug=ABIRATERONE ACETATE	-7.0
5046	S(=O)([O-])(=Nc1ncccc1)c1ccc(N=Nc2cc(C(=O)[O-])c(O)cc2)cc1	China Approved Name=sulfasalazine WHO Essential Medicine=sulfasalazine Australia Approved Name=SULFASALAZINE FDA Approved Drug=SULFASALAZINE	-7.0
5080	O[C@H]1CC=2[C@](C)([C@@H]3[C@H]([C@@H]4[C@](C)([C@@H]5[C@@H](C)[C@H]6[N+H]([C@H]5C4)C[C@@H](C)CC6)CC3)CC=2)CC1	Traditional Herbal Isolate=solanidine	-7.0
5081	O[C@H]1CC=2[C@](C)([C@H]3[C@H]([C@H]4[C@@](C)([C@H]5[C@@H](C)[C@@H]6[N+H]([C@H]5C4)C[C@@H](C)CC6)CC3)CC=2)CC1	Traditional Herbal Isolate=solanidine	-7.0
5085	O[C@@H]1CC=2[C@@](C)([C@H]3[C@H]([C@H]4[C@](C)([C@H]5[C@H](C)[C@@H]6[N+H]([C@@H]5C4)C[C@@H](C)CC6)CC3)CC=2)CC1	Traditional Herbal Isolate=solanidine	-7.0
5088	O[C@@H]1CC=2[C@@](C)([C@H]3[C@H]([C@@H]4[C@](C)([C@@H]5[C@H](C)[C@H]6[N+H]([C@H]5C4)C[C@@H](C)CC6)CC3)CC=2)CC1	Traditional Herbal Isolate=solanidine	-7.0
5168	O=C(OCC(=O)[C@]1(O)[C@@]2(C)[C@@H]([C@@H]3[C@H](C(=O)C2)[C@]2(C)C(=CC(=O)CC2)CC3)CC1)C	China Approved Name=cortisone acetate FDA Approved Drug=CORTISONE ACETATE	-7.0
5182	O=C(Nc1ccc(C(=O)[O-])cc1)[C@H](NC(=O)c1ccccc1)Cc1ccc(O)cc1	FDA Approved Drug=BENTIROMIDE	-7.0
5235	O=C(O[C@H]1[C@@]2(C)[C@@H]([C@H]3[C@H]([C@@H]4C(=CC(=O)CC4)CC3)CC2)CC1)CCc1ccccc1	China Approved Name=nandrolone phenylpropionate Indian Approved Name=nandrolone phenylpropionate FDA Approved Drug=NANDROLONE PHENPROPIONATE	-7.0
5265	Fc1ccc([C@H](O)CC[C@H]2[C@H](N(c3ccc(F)cc3)C2=O)c2ccc(O)cc2)cc1	Indian Approved Name=ezetimibe FDA Approved Drug=EZETIMIBE	-7.0
5271	Fc1ccc(-c2c(/C=C/[C@H](O)C[C@@H](O)CC(=O)[O-])n(C(C)C)c3c2cccc3)cc1	China Approved Name=fluvastatin FDA Approved Drug=FLUVASTATIN	-7.0
5288	C(C)(C)[C@H]1[C@]2(C)[C@@H]([C@]3(C)[C@@](C)([C@@H]4[C@](C)([C@H]5[C@](C)(C(C)=CCC5)CC4)CC3)CC2)CC1	Traditional Herbal Isolate=filicene	-7.0
5300	O=C([O-])c1cc2c(cc(-c3cc(c(OC)cc3)C34CC5CC(C3)CC(C4)C5)cc2)cc1	Indian Approved Name=adapalene FDA Approved Drug=ADAPALENE	-7.0
5320	O=C(O[C@@H]1[C@@]2(C)[C@@H]([C@H]3[C@@H]([C@]4(C)C(=CC(=O)CC4)CC3)CC2)CC1)CCC1CCCC1	NPC Approved Name=amyltricresol secondary	-7.0
5381	O=C1[C@H]2[C@](C)([C@@H]3[C@H]([C@H]4[C@H]([C@H]5[C@H]([C@H](C)[C@H]6[N+H](C[C@@H](C)CC6)C5)CC4)C3)C1)CC[C@H](O)C2	Traditional Herbal Isolate=puqiedinone	-7.0
5437	O[C@H]1[C@@]2(C)[C@@H]3[C@@H]([C@@H]4[C@](C)([C@H]5[C@H](C)[C@]6(O[C@@H]5C4)OC[C@H](C)CC6)CC3)CC[C@H]2CCC1	Traditional Herbal Isolate=spirostanol saponins	-7.0
5445	Clc1cc2c(/C(=C/3\CC[N+H](Cc4cc(C)cnc4)CC\3)/c3ncccc3CC2)cc1	Indian Approved Name=rupatadine	-7.0
5608	O=CC=1[C@]2(C)[C@@H]([C@]3(C)[C@H]([C@@]4(C)[C@](C)([C@@H]5[C@@](C)([C@H](C(C)C)CC5)CC4)CC3)CC2)CCC=1	Traditional Herbal Isolate=filicenal	-7.0
5617	O=CC=1[C@]2(C)[C@H]([C@]3(C)[C@H]([C@@]4(C)[C@@](C)([C@@H]5[C@](C)([C@@H](C(C)C)CC5)CC4)CC3)CC2)CCC=1	Traditional Herbal Isolate=filicenal	-7.0
5695	O[C@@H]1C(C)(C)[C@@H]2[C@](C)(C=3[C@H]([C@@]4(C)[C@](C)([C@@H]5[C@](C)([C@@H](C(C)C)CC5)CC4)CC=3)CC2)CC1	Traditional Herbal Isolate=fernenol	-7.0
5697	O[C@@H]1C(C)(C)[C@H]2[C@](C)([C@@H]3[C@@](C)([C@@]4(C)[C@H]([C@H]5[C@@H](C)C(=C)CC[C@@]5(C)CC4)CC3)CC2)CC1	Traditional Herbal Isolate=lactucerol	-7.0
5698	O=C1[C@H](C)[C@]2(C)[C@H]([C@@]3(C)[C@@H]([C@]4(C)[C@@](C)(C[C@@](CC/C=C(\C)/C)(C)CC4)CC3)CC2)CC1	Traditional Herbal Isolate=shionon	-7.0
5735	O[C@@H]1CC23[C@@](C)([C@H]4C(OO2)([C@@H]2[C@](C)([C@H]([C@@H](/C=C/[C@@H](C(C)C)C)C)CC2)CC4)C=C3)CC1	Traditional Herbal Isolate=ergosterol peroxide	-7.0
5750	O[C@]1(C)OCC23[C@H]4[C@](C)([C@@]5(C)[C@H]([C@]6(C)[C@H](C(C)(C)CCC6)CC5)CC4)CC[C@@H]2[C@H]1CC3	Traditional Herbal Isolate=adipedatol	-7.0
5752	O[C@]1(C)OCC23[C@@H]4[C@](C)([C@@]5(C)[C@@H]([C@]6(C)[C@H](C(C)(C)CCC6)CC5)CC4)CC[C@@H]2[C@H]1CC3	Traditional Herbal Isolate=adipedatol	-7.0
5760	S(=O)(=O)(C[C@](O)(C(=O)Nc1cc(C(F)(F)F)c(C#N)cc1)C)c1ccc(F)cc1	Indian Approved Name=bicalutamide FDA Approved Drug=BICALUTAMIDE	-7.0
5830	O[C@@H]1[C@@H](O)C[C@@H]2[C@](C)([C@@H]3[C@@H]([C@@H]4[C@](C)([C@H]5[C@@H](C)[C@]6(O[C@H]5C4)OC[C@H](C)CC6)CC3)CC2)C1	Traditional Herbal Isolate=markogenin	-7.0
5839	Clc1ccc([C@H](N2CC[N+H](Cc3ccc(C(C)(C)C)cc3)CC2)c2ccccc2)cc1	FDA Approved Drug=BUCLIZINE HYDROCHLORIDE	-7.0
5918	O=C1O[C@@]2(C)CC3=C4[C@](C)([C@@]5(C)[C@@H]([C@@]6(C)[C@@H](C(C)(C)[C@H](O)CC6)CC5)CC4)CC[C@@]13CC2	Traditional Herbal Isolate=larreagenin	-7.0
5928	O=C1[C@@H](C)[C@]2(C)[C@H]([C@@]3(C)[C@H](C(=O)C2)[C@@]2(C)[C@](C)([C@@H]4[C@](C)(CC2)CCC(C)(C)C4)CC3)CC1	Traditional Herbal Isolate=putranjivadione	-7.0
5960	O=C(N)C=1C(=O)[C@]2(O)C([O-])=C3C(=O)c4c([O-])cccc4[C@](O)(C)[C@H]3C[C@H]2[C@@H]([N+H](C)C)C=1[O-]	China Approved Name=tetracycline Indian Approved Name=tetracycline hcl;tetracycline WHO Essential Medicine=tetracycline Australia Approved Name=TETRACYCLINE FDA Approved Drug=TETRACYCLINE;TETRACYCLINE HYDROCHLORIDE;TETRACYCLINE PHOSPHATE COMPLEX	-7.0
6031	O[C@@](CC/C=C(\C)/C)(C)[C@H]1[C@H]2[C@](C)([C@]3(C)[C@H]([C@]4(C)[C@H](C(C)(C)[C@@H](O)CC4)CC3)CC2)CC1	Traditional Herbal Isolate=dammarenediol ii	-7.0
6032	O[C@@](CC/C=C(\C)/C)(C)[C@@H]1[C@H]2[C@](C)([C@]3(C)[C@H]([C@]4(C)[C@H](C(C)(C)[C@@H](O)CC4)CC3)CC2)CC1	Traditional Herbal Isolate=dammarenediol ii	-7.0
6037	O(C)c1c([C@H]2[C@@H](O)[C@@H](O)[C@H](O)[C@H](CO)O2)c([O-])c2C(=O)C=C(c3ccc(O)cc3)Oc2c1	Traditional Herbal Isolate=swertisin	-7.0
6054	O([C@H]1[C@@H](O)[C@H](O)[C@@H](O)[C@H](CO)O1)c1cc([O-])c2C(=O)C([O-])=C(c3ccc(O)cc3)Oc2c1	Traditional Herbal Isolate=kaempferol-3-galactoside daempferol	-7.0
6055	O([C@H]1[C@H](O)[C@H](O)[C@@H](O)[C@H](CO)O1)c1cc([O-])c2C(=O)C([O-])=C(c3ccc(O)cc3)Oc2c1	Traditional Herbal Isolate=kaempferol-3-galactoside daempferol	-7.0
6084	O=C1c2c([O-])c([C@H]3[C@H](O)[C@@H](O)[C@H](O)[C@H](CO)O3)c(O)cc2OC(c2cc(O)c(O)cc2)=C1	Traditional Herbal Isolate=iso orientin;homoorientin;iso-orientin	-7.0
6153	O=C1O[C@@H](c2cocc2)[C@@]2(C)[C@@]3([C@@]4(C)C(=O)C[C@H]5C(C)(C)OC(=O)C=C[C@]5(C)[C@H]4CC2)O[C@H]13	Traditional Herbal Isolate=obacunone	-7.0
6175	O=C([O-])[C@]12[C@@H](C=3[C@](C)([C@]4(C)[C@@H]([C@]5(C)[C@H](C(C)(C)[C@@H](O)CC5)CC4)CC=3)CC1)CC(C)(C)CC2	Traditional Herbal Isolate=pentacyclic triterpene	-7.0
6227	O=C(O[C@@H]1C=2[C@](C)([C@@H]3[C@@](O)([C@@]4(O)[C@@](C)([C@H](C5=COC(=O)C=C5)CC4)CC3)C1)CC[C@H](O)C=2)C	Traditional Herbal Isolate=irridoid glycoside-sambacin;lepitidine glycoside;glycoside pharbitin;glycoside rhaphantin	-7.0
6339	O=C1C(C)=C2[C@@]([C@]34OC(=O)C(C)=C3C[C@@H]3C(=C)CCC[C@]3(C)C4)(O1)C[C@]1(C)[C@H](C(=C)CCC1)C2	Traditional Herbal Isolate=biatractylolide	-7.0
6348	O([C@H]1[C@@H](O)[C@H](O)[C@@H](O)[C@H](CO)O1)C1=C(c2cc(O)c(O)cc2)Oc2c(c([O-])cc(O)c2)C1=O	Traditional Herbal Isolate=quercetin-3-o-galactoside;hyperoside;hyperin;quercetin-3-galactoside	-7.0
6397	O=C(O[C@@H]1C(C)(C)[C@H]2[C@](C)([C@@H]3[C@@](C)([C@@]4(C)[C@H]([C@H]5[C@@H](C)C(=C)CC[C@@]5(C)CC4)CC3)CC2)CC1)C	Traditional Herbal Isolate=taraxasteryl acetate	-7.0
6440	O[C@@H]1C(C)(C)[C@@H]2[C@](C)([C@@H]3[C@@](C)(C45[C@@H]([C@H]6[C@@](O)(C)C[C@@H](/C=C(\C)/C)OC6(OC4)C5)CC3)CC2)CC1	Traditional Herbal Isolate=jujubogenin	-7.0
6453	O[C@@H]1[C@@H]([C@H]2[C@@]3(C)[C@](C)(C=4[C@@H]([C@]5(C)[C@H](C(C)(C)[C@@H](O)CC5)CC=4)CC3)CC2)C[C@@H]([C@H]2C(C)(C)O2)O1	Traditional Herbal Isolate=melianol	-7.0
6504	O=C(O[C@H]1[C@@H](O)[C@H](O)[C@@H](O)[C@@H](C(=O)[O-])O1)/C=C(\C=C\C=C(/C=C/C=1C(C)(C)CCCC=1C)\C)/C	Traditional Herbal Isolate=acacetin-7-beta-d-glucurono-b-d- glucuronide	-7.0
6588	Clc1cc2N(CCC[N+H]3CCC4(C(=O)N[C@H]5[N+H]4CCCC5)CC3)c3c(cccc3)CCc2cc1	NPC Approved Name=mosapramine	-7.0
6618	O=C1[C@@]2(C)[C@H](C34C(C(C)(C)OC3CC(=O)OC4)=C1O)CCC1(C)[C@@H](c3cocc3)OC(=O)C3O[C@@]213	Traditional Herbal Isolate=evodol	-7.0
6623	O=C1C(C)=C(C)C[C@@H]([C@]2(C)O[C@H](O)C34O[C@@](O)([C@@H]5[C@@H]([C@]6(C)C(=O)CC=CC6=CC5)CC3)CCC24)O1	Traditional Herbal Isolate=withaphysalin	-7.0
6723	Clc1cc(C=2c3c(N(C)C(=O)C=2)ccc([C@@]([N+H3])(c2n(C)cnc2)c2ccc(Cl)cc2)c3)ccc1	NPC Approved Name=tipifarnib	-7.0
6736	O[C@@H](C(O)(C)C)[C@H]1O[C@H](O)[C@@H]([C@H]2[C@@]3(C)[C@](C)(C=4[C@@H]([C@]5(C)[C@@H](C(C)(C)[C@H](O)CC5)CC=4)CC3)CC2)C1	Traditional Herbal Isolate=melianotriol	-7.0
6740	O[C@H](C(O)(C)C)[C@H]1O[C@@H](O)[C@@H]([C@H]2[C@]3(C)[C@](C)(C=4[C@@H]([C@]5(C)[C@H](C(C)(C)[C@@H](O)CC5)CC=4)CC3)CC2)C1	Traditional Herbal Isolate=melianotriol	-7.0
6785	O=C(O[C@@H]1C(C)(C)[C@@H]2[C@](C)([C@H]3[C@](C)([C@]4(C)C([C@@H]5[C@@](C(=O)[O-])(CC4)CCC(C)(C)C5)=CC3)CC2)CC1)C	Traditional Herbal Isolate=acetyl oleanolic acid	-7.0
6852	O=[N+]([O-])c1cc([C@H]2C(C(=O)OC)=C(C)NC(C)=C2C(=O)O[C@H]2C[N+@@H](Cc3ccccc3)CCC2)ccc1	Indian Approved Name=benidipine hcl	-7.0
6853	O=[N+]([O-])c1cc([C@H]2C(C(=O)OC)=C(C)NC(C)=C2C(=O)O[C@H]2C[N+@H](Cc3ccccc3)CCC2)ccc1	Indian Approved Name=benidipine hcl	-7.0
6872	O=C1C2(O)C34[C@](C)(O1)[C@@H]1OC(=O)C(=C)[C@@](C)([C@@H]3C(=O)[C@](O)(O4)[C@H]3[C@@H]([C@@]4(C)C(=O)C=CCC4=CC3)CC2)C1	Traditional Herbal Isolate=physalin c	-7.0
6885	O=C(OC[C@@]12O[C@H]1[C@H](O)[C@H]1[C@H]2[C@H](O[C@H]2[C@H](O)[C@H](O)[C@@H](O)[C@H](CO)O2)OC=C1)c1cc(OC)c(O)cc1	Traditional Herbal Isolate=kutkoside	-7.0
6886	O=C(OC[C@]12O[C@@H]1[C@@H](O)[C@H]1[C@H]2[C@H](O[C@@H]2[C@H](O)[C@H](O)[C@@H](O)[C@@H](CO)O2)OC=C1)c1cc(OC)c(O)cc1	Traditional Herbal Isolate=kutkoside	-7.0
6963	O(C)[C@@H]1[C@H](O)[C@H](C)O[C@H](O[C@H]2C[C@@H]3[C@@](C)([C@@H]4[C@H]([C@@]5(O)[C@@](C)([C@H](C6=CC(=O)OC6)CC5)CC4)CC3)CC2)C1	Traditional Herbal Isolate=somalin	-7.0
7033	Clc1c([C@@]2(Cn3cncc3)O[C@H](COc3ccc(N4CCN(C(=O)C)CC4)cc3)CO2)ccc(Cl)c1	FDA Approved Drug=KETOCONAZOLE	-7.0
7053	O=C[C@]12[C@@H]3[C@H]([C@]4(O)[C@](C)([C@H](C5=CC(=O)OC5)CC4)CC3)CC[C@@H]1C[C@H]1O[C@@H]3[C@](O)([C@@H](O)C[C@H](C)O3)O[C@H]1C2	Traditional Herbal Isolate=calotropin	-7.0
7056	Clc1c([C@@]2(Cn3ncnc3)O[C@H](COc3ccc(N4CC[N+H](C(C)C)CC4)cc3)CO2)ccc(Cl)c1	Indian Approved Name=terconazole FDA Approved Drug=TERCONAZOLE	-7.0
7101	O([C@@H]1O[C@@H](C)[C@H](O)[C@H](O)C1)[C@@H]1C[C@]2(O)[C@@](CO)([C@@H]3[C@H]([C@]4(O)[C@@](C)([C@H](C5=CC(=O)OC5)CC4)CC3)CC2)CC1	Traditional Herbal Isolate=helveticosol	-7.0
7114	O([C@H]1[C@H](O)[C@@H](O)[C@@H](O)[C@H](C)O1)[C@@H]1C[C@]2(O)[C@@](C)([C@@H]3[C@H]([C@]4(O)[C@@](C)([C@H](C5=CC(=O)OC5)CC4)CC3)CC2)CC1	Traditional Herbal Isolate=peripalloside	-7.0
7116	O([C@H]1[C@@H](O)[C@H](O)[C@@H](O)[C@H](C)O1)[C@@H]1C[C@]2(O)[C@@](C)([C@@H]3[C@H]([C@]4(O)[C@@](C)([C@H](C5=CC(=O)OC5)CC4)CC3)CC2)CC1	Traditional Herbal Isolate=peripalloside	-7.0
7121	O([C@H]1[C@@H](O)[C@@H](O)[C@@H](O)[C@H](C)O1)[C@@H]1C[C@]2(O)[C@@](C)([C@H]3[C@H]([C@]4(O)[C@@](C)([C@H](C5=CC(=O)OC5)CC4)CC3)CC2)CC1	Traditional Herbal Isolate=peripalloside	-7.0
7162	O(C)[C@H]1[C@@H](O)[C@@H](C)O[C@@H](O[C@H]2C[C@H]3[C@@](C)([C@@H]4C(=O)[C@@H](O)[C@@]5(C)[C@@H](C6=CC(=O)OC6)CC[C@@]5(O)[C@H]4CC3)CC2)C1	Traditional Herbal Isolate=caudoside;sarmutoside	-7.0
7173	O=C[C@]12[C@H]3[C@@H](O)C[C@@]4(C)[C@H](C5=CC(=O)OC5)CC[C@]4(O)[C@@H]3CC[C@H]1C[C@@H](O[C@H]1O[C@@H](C)[C@H](O)[C@H](OC)C1)CC2	Traditional Herbal Isolate=sinoside	-7.0
7186	O=C[C@]12[C@@H]3[C@@H](O)C[C@@]4(C)[C@H](C5=CC(=O)OC5)CC[C@]4(O)[C@H]3CC[C@H]1C[C@@H](O[C@H]1O[C@H](C)[C@H](O)[C@H](OC)C1)CC2	Traditional Herbal Isolate=sinoside	-7.0
7190	O(C)[C@H]1[C@@H](O)[C@@H](C)O[C@@H](O[C@H]2C[C@@H]3[C@@](C)([C@@H]4[C@H](O)C(=O)[C@]5(C)[C@H](C6=CC(=O)OC6)CC[C@@]5(O)[C@H]4CC3)CC2)C1	Traditional Herbal Isolate=sinostroside	-7.0
7223	O=C[C@]12[C@@](O)(C[C@@H](O[C@H]3[C@@H](O)[C@H](O)[C@@H](O)[C@H](C)O3)CC1)CC[C@@H]1[C@]3(O)[C@@](C)([C@H](C4=CC(=O)OC4)CC3)CC[C@H]21	Traditional Herbal Isolate=strophalloside	-7.0
7234	O=C[C@]12[C@@](O)(C[C@@H](O[C@H]3[C@H](O)[C@H](O)[C@@H](O)[C@H](C)O3)CC1)CC[C@H]1[C@]3(O)[C@@](C)([C@H](C4=CC(=O)OC4)CC3)CC[C@@H]21	Traditional Herbal Isolate=strophalloside	-7.0
7259	O([C@@H]1[C@H](O)[C@@H](O)[C@H](O)[C@@H](C)O1)[C@@H]1C[C@]2(O)[C@@](C)([C@@H]3[C@H]([C@]4(O)[C@@](C)([C@H](O)C3)[C@H](C3=CC(=O)OC3)CC4)CC2)CC1	Traditional Herbal Isolate=alpha-antioside	-7.0
7260	O([C@@H]1[C@@H](O)[C@@H](O)[C@H](O)[C@H](C)O1)[C@@H]1C[C@]2(O)[C@@](C)([C@@H]3[C@H]([C@]4(O)[C@@](C)([C@H](O)C3)[C@H](C3=CC(=O)OC3)CC4)CC2)CC1	Traditional Herbal Isolate=alpha-antioside	-7.0
7267	O([C@@H]1[C@@H](O)[C@@H](O)[C@H](O)[C@H](C)O1)[C@@H]1C[C@]2(O)[C@@](C)([C@H]3[C@H]([C@]4(O)[C@@](C)([C@H](O)C3)[C@H](C3=CC(=O)OC3)CC4)CC2)CC1	Traditional Herbal Isolate=alpha-antioside	-7.0
7271	O([C@H]1[C@@H](O)[C@@H](O)[C@@H](O)[C@@H](C)O1)[C@@H]1C[C@]2(O)[C@@](C)([C@H]3[C@H]([C@]4(O)[C@@](C)([C@H](O)C3)[C@H](C3=CC(=O)OC3)CC4)CC2)CC1	Traditional Herbal Isolate=alpha-antioside	-7.0
7293	O[C@@H]1CC(C)(C)C(/C=C\C(=C\C=C/C(=C/C=C/C=C(/C=C/C=C(/C=C\C=2C(C)(C)CCCC=2C)\C)\C)/C)\C)=C(C)C1	Traditional Herbal Isolate=physoxanthin	-7.0
7297	O[C@@H]1CC(C)(C)C(/C=C\C(=C/C=C\C(=C/C=C\C=C(/C=C\C=C(/C=C\C=2C(C)(C)CCCC=2C)\C)\C)\C)\C)=C(C)C1	Traditional Herbal Isolate=physoxanthin	-7.0
7393	O[C@@H]1C2Oc3c(O)c(-c4c(O)c5OC6[C@@H](O)C=C[C@@H]7[C@@H]8[N+@H](C)CCC67c5c(c4)C8)cc4c3C32[C@@H]([C@H]([N+@H](C)CC3)C4)C=C1	Traditional Herbal Isolate=pseudomorphine	-7.0
7415	O=C(O[C@@H]1[C@]2(O)O[C@@H]3[C@@H](O[C@@H]2O[C@@H](C)C1)C[C@H]1[C@@](C=O)([C@H]2[C@H]([C@]4(O)[C@](C)([C@@H](C5=CC(=O)OC5)CC4)CC2)CC1)C3)C	Traditional Herbal Isolate=asclepiadin;asclepin	-7.0
7452	O([C@H]1[C@H](O)[C@H](O)[C@H](O)[C@@H](C)O1)c1cc([O-])c2C(=O)C(O[C@H]3[C@@H](O)[C@@H](O)[C@@H](O)[C@@H](C)O3)=C(c3ccc(O)cc3)Oc2c1	Traditional Herbal Isolate=kaempferitrin	-7.0
7453	O(C)c1c2Oc3c4c(OC)cc5c3[C@@H]([N+H2]CC5)Cc3ccc(Oc5c(OC)ccc(c5)CC5=NCCc(c15)cc2O4)cc3	Traditional Herbal Isolate=normenisarine	-7.0
7457	O=C(N[C@@]1(C(C)C)C(=O)N2[C@@H](CC(C)C)C(=O)N3[C@@H]([C@]2(O)O1)CCC3)[C@H]1C[N+@@H](C)[C@@H]2[C@@H](c3c4c([nH]cc4C2)ccc3)C1	NPC Approved Name=dihydro-alpha-ergocryptine	-7.0
7475	O=C(OCC(=O)[C@]1(O)[C@@]2(C)[C@@H]([C@H]3[C@@H]([C@@H](O)C2)[C@@]2(C)C(=CC(=O)C=C2)CC3)CC1)/C=C(\CC/C=C(\CC/C=C(\C)/C)/C)/C	NPC Approved Name=prednisolone farnesylate	-7.0
7478	Clc1c(OCc2cc(F)ccc2)ccc(Nc2ncnc3c2cc(-c2oc(CNCCS(=O)(=O)C)cc2)cc3)c1	Australia Approved Name=LAPATINIB FDA Approved Drug=LAPATINIB DITOSYLATE	-7.0
7573	O=C(O[C@H]1[C@@H](OC)[C@@H](C(=O)OC)[C@H]2[C@@H](C1)C[N+H]1[C@H](c3[nH]c4c(c3CC1)ccc(OC)c4)C2)/C=C/c1cc(OC)c(O)cc1	NPC Approved Name=rescimetol	-7.0
7575	O=C(N[C@@]1(C(C)C)C(=O)N2[C@H](C(CC)(C)C)C(=O)N3[C@H]([C@]2(O)O1)CCC3)[C@@H]1C[N+@@H](C)[C@@H]2[C@@H](c3c4c([nH]cc4C2)ccc3)C1	FDA Approved Drug=ERGOLOID MESYLATES	-7.0
7588	O=C(N[C@@]1(C(C)C)C(=O)N2[C@@H](C(CC)(C)C)C(=O)N3[C@@H]([C@]2(O)O1)CCC3)[C@H]1C[N+@H](C)[C@H]2[C@@H](c3c4c([nH]cc4C2)ccc3)C1	FDA Approved Drug=ERGOLOID MESYLATES	-7.0
7596	O(C[C@H]1[C@@H](O)[C@@H](O)[C@@H](O)[C@H](OC2=C(c3ccc(O)cc3)Oc3c(c([O-])cc(O)c3)C2=O)O1)[C@H]1[C@H](O)[C@@H](O)[C@H](O)[C@H](C)O1	Traditional Herbal Isolate=kaempferol-3-robinobioside	-7.0
7632	O([C@H]1[C@H](O)[C@H](O)[C@@H](O)[C@@H](C)O1)c1cc(O)c2c(O[C@@H](c3ccc(O)cc3)[C@@](O[C@H]3[C@@H](O)[C@H](O)[C@@H](O)[C@H](CO)O3)(O)C2)c1	Traditional Herbal Isolate=kaempferol-rhamno glucoside;physcim-l-gluco-rhamnoside	-7.0
7715	O(C)c1c2Oc3c4OCOc4cc4c3[C@H]([N+@@H](C)CC4)Cc3ccc(Oc4c(OC)ccc(c4)C[C@H]4[N+@H](C)CCc(c4c2)c1)cc3	Traditional Herbal Isolate=cepharanthine	-7.0
7718	O(C)c1c(OC)cc2c3[C@H]([N+@@H](C)CC2)Cc2ccc(cc2)COC=2C(=O)C4=C([N+H2]CCC4=CC=2OC)Cc2ccc(Oc13)cc2	Traditional Herbal Isolate=cissampareine	-7.0
7720	O(C[C@H]1[C@H](O)[C@H](O)[C@@H](O)[C@H](Oc2cc([O-])c3C(=O)C[C@H](c4cc(O)c(OC)cc4)Oc3c2)O1)[C@H]1[C@H](O)[C@H](O)[C@H](O)[C@@H](C)O1	Traditional Herbal Isolate=hesperidin	-7.0
7749	O(C)c1c(O)c2Oc3ccc(cc3)C[C@@H]3[N+@H](C)CCc4c3cc(c(OC)c4)Oc3c(OC)ccc(c3)C[C@H]3[N+@H](C)CCc(c23)c1	Traditional Herbal Isolate=hayatinine	-7.0
7752	O(C)c1c(O)c2Oc3ccc(cc3)C[C@H]3[N+@@H](C)CCc4c3cc(c(OC)c4)Oc3c(OC)ccc(c3)C[C@H]3[N+@H](C)CCc(c23)c1	Traditional Herbal Isolate=hayatinine	-7.0
7753	O(C)c1c(OC)cc2c3[C@@H]([N+@H](C)CC2)Cc2cc(c(O)cc2)Oc2ccc(cc2)C[C@@H]2[N+@H](C)CCc4c2cc(c(OC)c4)Oc13	Traditional Herbal Isolate=berbamine	-7.0
7766	O(C)c1c(O)c2Oc3ccc(cc3)C[C@H]3[N+@@H](C)CCc4c3cc(c(OC)c4)Oc3c(OC)ccc(c3)C[C@H]3[N+@H](C)CCc(c23)c1	Traditional Herbal Isolate=hayatidine	-7.0
7792	O=C(N[C@@]1(C(C)C)C(=O)N2[C@@H](Cc3ccccc3)C(=O)N3[C@H]([C@]2(O)O1)CCC3)[C@H]1C[N+@H](C)[C@@H]2[C@H](c3c4c([nH]cc4C2)ccc3)C1	NPC Approved Name=dihydroergocristine mesylate	-7.0
7793	O=C(N[C@@]1(C(C)C)C(=O)N2[C@@H](Cc3ccccc3)C(=O)N3[C@H]([C@@]2(O)O1)CCC3)[C@H]1C[N+@H](C)[C@@H]2[C@@H](c3c4c([nH]cc4C2)ccc3)C1	NPC Approved Name=dihydroergocristine mesylate	-7.0
7800	O(C)c1c(OC)cc2c([C@@H](Cc3ccc(Oc4c(O)ccc(C[C@@H]5[N+@H](C)CCc6c5cc(OC)c(O)c6)c4)cc3)[N+@@H](C)CC2)c1	Traditional Herbal Isolate=dauricinoline	-7.0
7805	O(C)c1c(OC)cc2c([C@@H](Cc3ccc(Oc4c(O)ccc(C[C@H]5[N+@@H](C)CCc6c5cc(OC)c(O)c6)c4)cc3)[N+@H](C)CC2)c1	Traditional Herbal Isolate=dauricinoline	-7.0
7839	O=C(O[C@H]1C(C)(C)[C@H]2[C@](C)([C@@H]3[C@@](C)([C@]4(C)C([C@@H]5[C@H](C)[C@@H](CO)CC[C@]5(C(=O)[O-])CC4)=CC3)CC2)CC1)/C=C/c1ccc(O)cc1	Traditional Herbal Isolate=rubicoumaric acid	-7.0
7840	O=C(O[C@@H]1C(C)(C)[C@H]2[C@](C)([C@H]3[C@](C)([C@]4(C)C([C@H]5[C@H](C)[C@@H](CO)CC[C@@]5(C(=O)[O-])CC4)=CC3)CC2)CC1)/C=C/c1ccc(O)cc1	Traditional Herbal Isolate=rubicoumaric acid	-7.0
7889	O=C(N[C@@H](C[C@@H](O)[C@@H](NC(=O)COc1c(C)cccc1C)Cc1ccccc1)Cc1ccccc1)[C@H](C(C)C)N1C(=O)NCCC1	China Approved Name=lopinavir WHO Essential Medicine=lopinavir Indian Approved Name=lopinavir FDA Approved Drug=LOPINAVIR	-7.0
7991	O([C@H]1[C@@H](O)[C@H](O)[C@H]2O[C@H](c3sccc3)OC[C@H]2O1)[C@H]1[C@@H]2[C@@H]([C@@H](c3cc(OC)c(O)c(OC)c3)c3c1cc1OCOc1c3)C(=O)OC2	FDA Approved Drug=TENIPOSIDE	-7.0
8026	O=C([O-])[C@]12[C@H](C=3[C@](C)([C@]4(C)[C@@H]([C@@]5(C)[C@H]([C@@](CO)(C)[C@@H](O[C@H]6[C@@H](O)[C@H](O)[C@H](O)[C@H](CO)O6)[C@H](O)C5)CC4)CC=3)CC1)CC(C)(C)[C@H](O)C2	Traditional Herbal Isolate=lucyoside a	-7.0
8069	O=C(N[C@@H]([C@H](O)C[N+@@H]1[C@H](C(=O)NC(C)(C)C)C[C@@H]2[C@@H](C1)CCCC2)Cc1ccccc1)[C@@H](NC(=O)c1nc2c(cc1)cccc2)CC(=O)N	WHO Essential Medicine=saquinavir FDA Approved Drug=SAQUINAVIR;SAQUINAVIR MESYLATE	-7.0
8109	O(C[C@@H]1[C@H](O)[C@H](OC)[C@H](O)[C@H](O[C@@H]2C[C@]3(O)[C@@](C)([C@@H]4[C@@H]([C@]5(O)[C@@](C)([C@H](C6=CC(=O)OC6)CC5)CC4)CC3)CC2)O1)[C@@H]1[C@H](C)O[C@H](O)C[C@@H]1O	Traditional Herbal Isolate=periplocin	-7.0
8112	O(C[C@H]1[C@H](O)[C@H](OC)[C@H](O)[C@H](O[C@@H]2C[C@]3(O)[C@@](C)([C@H]4[C@@H]([C@]5(O)[C@@](C)([C@H](C6=CC(=O)OC6)CC5)CC4)CC3)CC2)O1)[C@@H]1[C@H](C)O[C@H](O)C[C@@H]1O	Traditional Herbal Isolate=periplocin	-7.0
8113	O(C[C@H]1[C@H](O)[C@H](OC)[C@@H](O)[C@H](O[C@@H]2C[C@]3(O)[C@@](C)([C@@H]4[C@H]([C@]5(O)[C@@](C)([C@H](C6=CC(=O)OC6)CC5)CC4)CC3)CC2)O1)[C@@H]1[C@H](C)O[C@H](O)C[C@@H]1O	Traditional Herbal Isolate=periplocin	-7.0
8123	O(C[C@@H]1[C@H](O)[C@@H](O)[C@H](O)[C@H](O[C@@H]2C[C@]3(O)[C@@](CO)([C@@H]4[C@@H]([C@]5(O)[C@@](C)([C@H](C6=CC(=O)OC6)CC5)CC4)CC3)CC2)O1)[C@@H]1[C@H](C)O[C@H](O)C[C@@H]1O	Traditional Herbal Isolate=erysimosol	-7.0
8155	O=C([C@](O)(C)[C@H]1[C@@H](O)C[C@@]2(C)[C@]1(C)CC(=O)[C@]1(C)[C@@H]3C(C(C)(C)C(=O)C(O[C@H]4[C@@H](O)[C@H](O)[C@H](O)[C@H](CO)O4)=C3)=CC[C@H]21)/C=C/C(OC(=O)C)(C)C	Traditional Herbal Isolate=colocynthin tricosanthin	-7.0
8172	FC(F)(F)C(=O)N[C@H]1[C@@H](O)[C@H](C)O[C@@H](O[C@@H]2c3c([O-])c4C(=O)c5c(OC)cccc5C(=O)c4c([O-])c3C[C@@](O)(C(=O)COC(=O)CCCC)C2)C1	FDA Approved Drug=VALRUBICIN	-7.0
8189	O=C[C@@]12[C@@](O)(C[C@@H](O[C@@H]3[C@@H](O)[C@H](O)[C@H](O[C@H]4[C@H](O)[C@@H](O)[C@@H](O)[C@@H](CO)O4)[C@@H](C)O3)CC1)CC[C@H]1[C@@]3(O)[C@](C)([C@@H](C4=COC(=O)C=C4)CC3)CC[C@H]21	Traditional Herbal Isolate=hellebrin	-7.0
8193	O=C[C@@]12[C@](O)(C[C@H](O[C@@H]3[C@@H](O)[C@@H](O)[C@H](O[C@@H]4[C@@H](O)[C@@H](O)[C@H](O)[C@@H](CO)O4)[C@H](C)O3)CC1)CC[C@H]1[C@@]3(O)[C@@](C)([C@@H](C4=COC(=O)C=C4)CC3)CC[C@H]21	Traditional Herbal Isolate=hellebrin	-7.0
8203	O=C[C@]12[C@@](O)(C[C@H](O[C@@H]3[C@@H](O)[C@H](O)[C@@H](O[C@@H]4[C@H](O)[C@H](O)[C@@H](O)[C@@H](CO)O4)[C@@H](C)O3)CC1)CC[C@@H]1[C@@]3(O)[C@@](C)([C@H](C4=COC(=O)C=C4)CC3)CC[C@@H]21	Traditional Herbal Isolate=hellebrin	-7.0
8289	P(=O)(OP(=O)(OP(=O)(OC[C@H]1[C@@H](O)C[C@@H](N2C(=O)N=C(N)C=C2)O1)[O-])[O-])(OP(=O)(OC[C@H]1[C@H](O)[C@@H](O)[C@H](N2C(=O)NC(=O)C=C2)O1)[O-])[O-]	NPC Approved Name=denufosol [inn]	-7.0
8299	P(=O)(OP(=O)(OP(=O)(OC[C@H]1[C@@H](O)C[C@@H](N2C(=O)N=C(N)C=C2)O1)[O-])[O-])(OP(=O)(OC[C@H]1[C@H](O)[C@@H](O)[C@H](N2C(=O)NC(=O)C=C2)O1)[O-])[O-]	NPC Approved Name=denufosol [inn]	-7.0
8328	O=C([O-])[C@]12[C@@H](C=3[C@](C)([C@@]4(C)[C@@H]([C@]5(C)[C@H](C(C)(C)[C@@H](O[C@@H]6[C@@H](O[C@@H]7[C@@H](O)[C@H](O)[C@H](O)[C@H](CO)O7)[C@H](O)[C@H](O)[C@H](CO)O6)CC5)CC4)CC=3)CC1)CC(C)(C)CC2	Traditional Herbal Isolate=dianthronic heteroside	-7.0
8329	O=C([O-])[C@]12[C@@H](C=3[C@](C)([C@@]4(C)[C@@H]([C@]5(C)[C@H](C(C)(C)[C@@H](O[C@H]6[C@@H](O[C@@H]7[C@@H](O)[C@H](O)[C@H](O)[C@H](CO)O7)[C@H](O)[C@H](O)[C@H](CO)O6)CC5)CC4)CC=3)CC1)CC(C)(C)CC2	Traditional Herbal Isolate=dianthronic heteroside	-7.0
8351	O([C@@H]1[C@@H](O)[C@@H](O)[C@@H](O)[C@H](CO)O1)[C@H]1[C@H]([C@@H](CC/C=C(\C)/C)C)[C@]2(C)[C@](C)([C@@H]3[C@]4([C@@]5(C(C(C)(C)[C@@H](O[C@@H]6[C@@H](O)[C@@H](O)[C@H](O)[C@@H](CO)O6)CC5)C(=O)C3)C4)CC2)C1	Traditional Herbal Isolate=diadzin-4 7-diglucoside	-7.0
8467	O(C)[C@@H]1[C@H](O)[C@@H](O[C@@H]2[C@@H](C)O[C@H](O[C@H]3[C@@H](C)O[C@H](O[C@@H]4C[C@@H]5[C@@](C)([C@@H]6[C@](O)([C@@]7(O)[C@](C)([C@H](O)C6)[C@@](O)([C@@H](O)C)CC7)CC5)CC4)C[C@H]3OC)C[C@@H]2OC)O[C@H](C)[C@H]1O	Traditional Herbal Isolate=tenacissoside a	-7.0
8470	Ic1c([O-])c(I)cc2C(c3c(C(=O)[O-])cccc3)=C3C(=C(I)C(=O)C(I)=C3)Oc12	NPC Approved Name=erythrosin b	-7.0
8540	O([C@H]1[C@H](O[C@H]2[C@H](O)[C@H](O)[C@H](O)[C@@H](C)O2)[C@H](O[C@@H]2CC=3[C@@](C)([C@H]4[C@H]([C@@H]5[C@](C)([C@@H]6[C@H](C)[C@H]7[N+H]([C@H]6C5)C[C@@H](C)CC7)CC4)CC=3)CC2)O[C@H](CO)[C@H]1O)[C@@H]1[C@H](O)[C@H](O)[C@@H](O)[C@@H](CO)O1	Traditional Herbal Isolate=solanine	-7.0
8553	O=C([O-])[C@]12[C@H](C=3[C@](C)([C@]4(C)[C@@H]([C@@]5(C)[C@@H](C(C)(C)[C@@H](O[C@H]6[C@@H](O[C@@H]7[C@@H](O[C@H]8[C@H](O)[C@@H](O)[C@@H](O)[C@@H](C)O8)[C@H](O)[C@@H](O)[C@@H](CO)O7)[C@H](O)[C@@H](O)CO6)CC5)CC4)CC=3)CC1)CC(C)(C)CC2	Traditional Herbal Isolate=raddeanin a	-7.0
8560	O=C([O-])[C@]12[C@@H](C=3[C@](C)([C@@]4(C)[C@H]([C@]5(C)[C@@H](C(C)(C)[C@H](O[C@@H]6[C@H](O[C@H]7[C@@H](O[C@H]8[C@@H](O)[C@H](O)[C@H](O)[C@H](C)O8)[C@H](O)[C@H](O)[C@H](CO)O7)[C@@H](O)[C@@H](O)CO6)CC5)CC4)CC=3)CC1)CC(C)(C)CC2	Traditional Herbal Isolate=raddeanin a	-7.0
8569	O(C)[C@@H]1[C@@H](O[C@@H]2O[C@H](C)[C@H](O)[C@H](OC)C2)[C@@H](C)O[C@@H](O[C@@H]/2[C@@H](C)/C=C/C=C/3\[C@@]4(O)[C@H]([C@@H](O)C(C)=C[C@H]4C(=O)O[C@@H]4C[C@]5(O[C@H]([C@@H](C)C=C5)C5CCCCC5)O[C@H](C4)C/C=C\2/C)OC\3)C1	NPC Approved Name=doramectin	-7.0
8612	O=C([O-])[C@H]1[C@@H](O)C[C@H](O[C@H]2[C@@H](O)[C@@H]([N+H3])[C@@H](O)[C@H](C)O2)/C=C/C=C/C=C/C=C/CC/C=C/C=C/[C@@H](C)[C@@H](O)[C@H](C)[C@H](C)OC(=O)C[C@H](O)C[C@@H](O)C[C@@H](O)CC[C@@H](O)[C@H](O)CC(=O)C[C@@H]1O	China Approved Name=nystatin;Nystatin WHO Essential Medicine=nystatin Australia Approved Name=NYSTATIN FDA Approved Drug=NYSTATIN	-7.0
8645	O=C([O-])[C@@H]1[C@H](O)[C@@H](O)[C@H](O[C@H]2[C@@H](O)[C@H](O)[C@H](O)[C@H](CO)O2)[C@H](O[C@@H]2C(C)(C)[C@@H]3[C@@](C)([C@@H]4[C@](C)([C@@]5(C)C([C@H]6[C@@](C(=O)O[C@H]7[C@@H](O)[C@H](O)[C@H](O)[C@H](CO)O7)(CC5)CCC(C)(C)C6)=CC4)CC3)CC2)O1	Traditional Herbal Isolate=ginsenoside ro	-7.0
8650	O=C([O-])[C@@H]1[C@H](O)[C@@H](O)[C@H](O[C@H]2[C@@H](O)[C@H](O)[C@H](O)[C@H](CO)O2)[C@H](O[C@H]2C(C)(C)[C@@H]3[C@@](C)([C@H]4[C@](C)([C@@]5(C)C([C@H]6[C@@](C(=O)O[C@H]7[C@@H](O)[C@H](O)[C@H](O)[C@H](CO)O7)(CC5)CCC(C)(C)C6)=CC4)CC3)CC2)O1	Traditional Herbal Isolate=ginsenoside ro	-7.0
8658	O=C(O[C@H]1[C@@H](O)[C@@H](O)[C@H](O)[C@@H](CO[C@@H]2[C@H](O)[C@@H](O)[C@@H](O[C@@H]3[C@H](O)[C@@H](O)[C@@H](O)[C@@H](C)O3)[C@H](CO)O2)O1)[C@@]12[C@H]([C@@H](C)[C@@H](C)CC1)C=1[C@](C)([C@@]3(C)[C@@H]([C@@]4(C)[C@H]([C@H](O)C3)[C@@](CO)(C)[C@H](O)[C@@H](O)C4)CC=1)CC2	Traditional Herbal Isolate=madecassoside	-7.0
8670	O=C(O[C@H]1[C@@H](O)[C@@H](O)[C@H](O)[C@H](CO[C@H]2[C@H](O)[C@@H](O)[C@@H](O[C@H]3[C@@H](O)[C@@H](O)[C@H](O)[C@@H](C)O3)[C@H](CO)O2)O1)[C@@]12[C@H]([C@@H](C)[C@@H](C)CC1)C=1[C@@](C)([C@@]3(C)[C@@H]([C@]4(C)[C@@H]([C@@H](O)C3)[C@](CO)(C)[C@@H](O)[C@@H](O)C4)CC=1)CC2	Traditional Herbal Isolate=madecassoside	-7.0
8695	O=C(NCC(=O)N)[C@H](NC(=O)[C@@H]1N(C(=O)[C@@H]2NC(=O)[C@@H](CC(=O)N)NC(=O)[C@H]([C@@H](O)C)NC(=O)[C@@H]([C@@H](CC)C)NC(=O)[C@@H](Cc3ccc(O)cc3)NC(=O)[C@H]([N+H3])CSSC2)CCC1)CC(C)C	Indian Approved Name=urofollitrophin FDA Approved Drug=UROFOLLITROPIN	-7.0
8704	O=C(O[C@@H]1[C@H](O[C@H]2[C@@H](O)[C@H](O)[C@H](O)[C@H](CO)O2)[C@H](C)O[C@@H](O[C@@H]2[C@H](C)O[C@@H](O[C@H]3[C@H](C)O[C@@H](O[C@@H]4C[C@H]5[C@@](C)([C@H]6[C@H]([C@]7(O)[C@](C)([C@H](O)C6)[C@H](C6=CC(=O)OC6)CC7)CC5)CC4)C[C@H]3O)C[C@@H]2O)C1)C	China Approved Name=lanatoside C	-7.0
8705	O=C(NCC(=O)N)[C@H](NC(=O)[C@@H]1N(C(=O)[C@@H]2NC(=O)[C@H](CC(=O)N)NC(=O)[C@H](CCC(=O)N)NC(=O)[C@@H]([C@@H](CC)C)NC(=O)[C@H](Cc3ccc(O)cc3)NC(=O)CCSSC2)CCC1)CC(C)C	Indian Approved Name=desamino oxytocin	-7.0
8743	O([C@@H]1[C@H](O)[C@@H](O)[C@@H](O[C@@H]2CC=3[C@@](C)([C@@H]4[C@@H]([C@]5(O)[C@](C)([C@H]6[C@@H](C)C7(O[C@H]6C5)OC[C@@H](C)CC7)CC4)CC=3)CC2)O[C@@H]1CO)[C@@H]1[C@@H](O[C@H]2[C@@H](O)[C@H](O)[C@H](O)[C@H](CO)O2)[C@@H](O[C@@H]2[C@H](O)[C@H](O)[C@@H](O)CO2)[C@H](O)[C@H](CO)O1	Traditional Herbal Isolate=steroidal saponin pod-ii	-7.0
8766	O=C(NCC(=O)N)[C@@H](NC(=O)[C@H]1N(C(=O)[C@@H]2NC(=O)[C@@H](CC(=O)N)NC(=O)[C@@H](CCC(=O)N)NC(=O)[C@H](Cc3ccccc3)NC(=O)[C@H](Cc3ccc(O)cc3)NC(=O)[C@@H]([N+H3])CSSC2)CCC1)CCCC[N+H3]	FDA Approved Drug=LYPRESSIN	-7.0
8778	O=C([C@@H](O)[C@@H](O)C)[C@H](OC)[C@@H]1[C@H](O[C@@H]2O[C@@H](C)[C@@H](O)[C@H](O[C@@H]3O[C@@H](C)[C@H](O)[C@H](O[C@@H]4O[C@@H](C)[C@H](O)[C@](O)(C)C4)C3)C2)C(=O)c2c([O-])c3c(O)c(C)c(O[C@@H]4O[C@@H](C)[C@@H](O)[C@H](O[C@@H]5O[C@@H](C)[C@@H](O)[C@H](O)C5)C4)cc3cc2C1	FDA Approved Drug=PLICAMYCIN	-7.0
8851	S(=O)(=O)(Oc1ccc(C[C@@H](NC(=O)[C@H]([N+H3])CC(=O)[O-])C(=O)N[C@H](C(=O)NCC(=O)N[C@H](C(=O)N[C@H](C(=O)N[C@@H](C(=O)N[C@@H](C(=O)N)Cc2ccccc2)CC(=O)[O-])CCSC)Cc2c3c([nH]c2)cccc3)CCSC)cc1)[O-]	NPC Approved Name=sincalide	-7.0
8885	O(C[C@@H](CC[C@@]1(O)[C@@H](C)[C@@H]2[C@]3(C)[C@@H]([C@@H]4[C@@H]([C@@]5(C)C(=CC4)C[C@H](O[C@@H]4[C@@H](O[C@H]6[C@@H](O)[C@@H](O)[C@@H](O)[C@@H](C)O6)[C@@H](O)[C@@H](O[C@@H]6[C@@H](O)[C@H](O)[C@H](O[C@H]7[C@H](O)[C@H](O)[C@H](O)[C@@H](C)O7)[C@@H](C)O6)[C@H](CO)O4)CC5)CC3)C[C@@H]2O1)C)[C@H]1[C@@H](O)[C@H](O)[C@H](O)[C@H](CO)O1	Traditional Herbal Isolate=asperoside;proto-isoerubosides	-7.0
8898	O(C[C@H](CC[C@@]1(O)[C@@H](C)[C@H]2[C@@]3(C)[C@@H]([C@@H]4[C@@H]([C@]5(C)C(=CC4)C[C@@H](O[C@@H]4[C@@H](O[C@H]6[C@@H](O)[C@@H](O)[C@@H](O)[C@@H](C)O6)[C@@H](O)[C@@H](O[C@@H]6[C@@H](O)[C@H](O)[C@H](O[C@H]7[C@H](O)[C@H](O)[C@H](O)[C@@H](C)O7)[C@@H](C)O6)[C@H](CO)O4)CC5)CC3)C[C@H]2O1)C)[C@H]1[C@@H](O)[C@H](O)[C@H](O)[C@H](CO)O1	Traditional Herbal Isolate=asperoside;proto-isoerubosides	-7.0
8920	O=C(N[C@H](C(=O)N[C@@H](C(=O)N[C@H](C(=O)N[C@H](C(=O)N1[C@H](C(=O)NCC)CCC1)CCCNC(=[N+H2])N)CC(C)C)CC(C)C)Cc1ccc(O)cc1)[C@@H](NC(=O)[C@@H](NC(=O)[C@@H](NC(=O)[C@H]1NC(=O)CC1)Cc1[nH]cnc1)Cc1c2c([nH]c1)cccc2)CO	FDA Approved Drug=LEUPROLIDE ACETATE	-7.0
8930	O=C(N[C@@H]1[C@H](C)OC(=O)[C@H](C(C)C)N(C)C(=O)CN(C)C(=O)[C@H]2N(C(=O)[C@@H](C(C)C)NC1=O)CCC2)c1c2N=C3C(C(=O)N[C@H]4[C@H](C)OC(=O)[C@H](C(C)C)N(C)C(=O)CN(C)C(=O)[C@@H]5N(C(=O)[C@@H](C(C)C)NC4=O)CCC5)=C(N)C(=O)C(C)=C3Oc2c(C)cc1	China Approved Name=actinomycin WHO Essential Medicine=dactinomycin Indian Approved Name=dactinomycin FDA Approved Drug=DACTINOMYCIN	-7.0
9090	O=C(O[C@@H]1[C@@H](C=O)OC(=O)c2c(c(O)c(O)c(O)c2)Oc2c(O)c(O)c3-c4c(O)c(O)c(O)cc4C(=O)O[C@H]4[C@H](OC(=O)c5cc(O)c(O)c(O)c5)C([C@@H](OC(=O)c5cc(O)c(O)c(O)c5)O[C@@H]4COC(=O)c3c2)OC(=O)c2c(c(O)c(O)c(O)c2)Oc2c(O)c(O)c3-c4c(O)c(O)c(O)cc4C(=O)OC[C@@H](O)C1OC(=O)c3c2)c1cc(O)c(O)c(O)c1	Traditional Herbal Isolate=woodfordin a	-7.0
2691	O([C@H]1[C@@H](O)C(=O)[C@@H](O)[C@H](CO)O1)c1c2c([nH]c1)cccc2	Traditional Herbal Isolate=indoxyl-5-ketogluconate	-6.9
3338	O=C(c1c2c([nH]c1)ncc(-c1cc(N)ccc1)c2)C1=NO[C@@H](C)C1	Indian Approved Name=methyl polysilox;methyl salicyalate	-6.9
3595	O=C1OC2(c3c1cccc3)c1c(Oc3c2ccc(O)c3)cc(O)cc1	Indian Approved Name=chlorbutanol;fluorescein sod Traditional Herbal Isolate=gambir-fluorescein Australia Approved Name=FLUORESCEIN SODIUM;FLUORESCEIN China Approved Name=fluorescein Sodium WHO Essential Medicine=fluorescein FDA Approved Drug=FLUORESCEIN SODIUM	-6.9
3733	O=C(O[C@@]1(C#C)[C@@]2(C)[C@@H]([C@@H]3[C@H]([C@@H]4C(=CC(=O)CC4)CC3)CC2)CC1)C	FDA Approved Drug=NORETHINDRONE ACETATE	-6.9
3850	O=C1O[C@H](c2cocc2)C[C@@]2(C)[C@H]1CC(=O)[C@H]1[C@@H]3C(=O)OC(C3)C[C@@H]21	Traditional Herbal Isolate=diosbulbin	-6.9
3853	O=C1O[C@H](c2cocc2)C[C@]2(C)[C@H]1CC(=O)[C@@H]1[C@@H]3C(=O)OC(C3)C[C@@H]21	Traditional Herbal Isolate=diosbulbin	-6.9
3894	[N+H](C)(C)[C@H]1CC=2[C@@](C)([C@H]3[C@H]([C@H]4[C@]5([C@H]([C@H](C)[N+H2]C5)CC4)CC3)CC=2)CC1	Traditional Herbal Isolate=conessimine	-6.9
3964	O=C([O-])c1ccc(C(=C)c2c(C)cc3C(C)(C)CCC(C)(C)c3c2)cc1	FDA Approved Drug=BEXAROTENE	-6.9
4082	O=C(C)N1[C@@H]2[C@@H]3[C@H](O)OCC=C4[C@H]3C[C@H]3[N+H](C4)CCC23c2c1cccc2	Traditional Herbal Isolate=diaboline	-6.9
4143	O=C([O-])CCNC(=O)c1ccc(N/N=C\2/C=C(C(=O)[O-])C(=O)C=C/2)cc1	FDA Approved Drug=BALSALAZIDE DISODIUM	-6.9
4201	O=C(CO)[C@@]1(O)[C@@]2(C)[C@@H]([C@H]3[C@@H]([C@@]4(C)C(=CC(=O)C=C4)CC3)C(=O)C2)CC1	FDA Approved Drug=PREDNISONE	-6.9
4313	O=C(C[N+@@H]1[C@H]2[C@@H]3C(c4c(ccc(O)c4)C2)(CC1)CCCC3)c1ccccc1	US Illegal/Scheduled Drug (Schedule 1)=Levophenacylmorphan	-6.9
4421	N#C/C=C/c1cc(C)c(Nc2nc(Nc3ccc(C#N)cc3)ncc2)c(C)c1	FDA Approved Drug=RILPIVIRINE;RILPIVIRINE HYDROCHLORIDE	-6.9
4535	C(=C/c1ccccc1)\CN1CC[N+H](C(c2ccccc2)c2ccccc2)CC1	China Approved Name=cinnarizine Indian Approved Name=cinnarizine	-6.9
4543	O[C@]12[C@@H](c3cc4OCOc4cc3)OC[C@H]1[C@H](c1cc3OCOc3cc1)OC2	Traditional Herbal Isolate=iso-paulownin	-6.9
4549	O[C@@H]1O[C@@H]2[C@H]([N+@@H](C)CCc3c2cc2OCOc2c3)c2c1c1OCOc1cc2	Traditional Herbal Isolate=rhoeagenine	-6.9
4592	O=C([O-])c1ccc(-n2c(-c3c(O)cccc3)nc(-c3c(O)cccc3)n2)cc1	FDA Approved Drug=DEFERASIROX	-6.9
4594	O=C(CO)[C@@]1(O)[C@@H](C)C[C@@H]2[C@@]1(C)CC(=O)[C@@H]1[C@@]3(C)C(=CC(=O)C=C3)CC[C@@H]21	FDA Approved Drug=MEPREDNISONE	-6.9
4651	O=C(Oc1cc2c([C@H]3[C@@H]([C@@H]4[C@](C)([C@H](O)CC4)CC3)CC2)cc1)c1ccccc1	Indian Approved Name=oestradiol benzoate	-6.9
4779	Clc1ccc(CC2=NN([C@H]3CC[N+@H](C)CCC3)C(=O)c3c2cccc3)cc1	Indian Approved Name=azelastine FDA Approved Drug=AZELASTINE HYDROCHLORIDE	-6.9
4992	Clc1ccc([C@@H](N2CC[N+H](Cc3cc(C)ccc3)CC2)c2ccccc2)cc1	Indian Approved Name=meclizine hcl FDA Approved Drug=MECLIZINE HYDROCHLORIDE	-6.9
5017	S(=O)(=O)(OC1=C(c2cc(OC)c(O)cc2)Oc2c(c([O-])cc(O)c2)C1=O)[O-]	Traditional Herbal Isolate=persicarin	-6.9
5065	O([C@@H](COC(=O)Nc1ccccc1)C[N+H]1CCCCC1)C(=O)Nc1ccccc1	NPC Approved Name=3-piperidino-1 2-propanediol dicarbanilate ester	-6.9
5099	O([C@H]1[C@@H](O)[C@@H](O)[C@@H](O)[C@H](CO)O1)C1=C(c2ccccc2)Oc2c(C1=O)cccc2	Traditional Herbal Isolate=irridoid glycosides;purpureal glycosides	-6.9
5102	O([C@@H]1[C@@H](O)[C@@H](O)[C@H](O)[C@H](CO)O1)C1=C(c2ccccc2)Oc2c(C1=O)cccc2	Traditional Herbal Isolate=irridoid glycosides;purpureal glycosides	-6.9
5105	O([C@@H]1[C@@H](O)[C@H](O)[C@@H](O)[C@@H](CO)O1)C1=C(c2ccccc2)Oc2c(C1=O)cccc2	Traditional Herbal Isolate=irridoid glycosides;purpureal glycosides	-6.9
5110	O([C@@H]1[C@@H](O)[C@H](O)[C@H](O)[C@@H](CO)O1)C1=C(c2ccccc2)Oc2c(C1=O)cccc2	Traditional Herbal Isolate=irridoid glycosides;purpureal glycosides	-6.9
5114	O=C([O-])[C@@H]1C(C)(C)S[C@@H]2[C@@H](NC(=O)c3c(C)onc3-c3ccccc3)C(=O)N12	FDA Approved Drug=OXACILLIN SODIUM	-6.9
5127	O[C@H]1C[C@H]2[C@](C)([C@@H]3[C@H]([C@@H]4[C@](C)([C@@H]([C@@H](/C=C/[C@@H](C(C)C)C)C)CC4)CC3)CC2)CC1	Traditional Herbal Isolate=spongesterol	-6.9
5183	O=C(Nc1ccc(C(=O)[O-])cc1)[C@@H](NC(=O)c1ccccc1)Cc1ccc(O)cc1	FDA Approved Drug=BENTIROMIDE	-6.9
5195	O=C(OCC(=O)[C@]1(O)[C@@]2(C)[C@@H]([C@H]3[C@@H]([C@@H](O)C2)[C@]2(C)C(=CC(=O)CC2)CC3)CC1)C	FDA Approved Drug=HYDROCORTISONE ACETATE	-6.9
5357	O=C(OC)[C@H]1[C@@H]2[C@H]3[C@@](C)([C@]4(OC(=O)CC4)CC3)C[C@H]3O[C@@]23[C@]2(C)C(=CC(=O)CC2)C1	Indian Approved Name=eplerenone FDA Approved Drug=EPLERENONE	-6.9
5377	O=C(OCC(=O)[C@H]1[C@@]2(C)[C@@H]([C@@H]3[C@H]([C@@]4(C)C(=CC(=O)CC4)CC3)CC2)CC1)C(C)(C)C	FDA Approved Drug=DESOXYCORTICOSTERONE PIVALATE	-6.9
5403	O([C@H]1[C@@H](O)[C@H](O)[C@H](O)[C@H](CO)O1)c1cc2OC=C(c3ccc(O)cc3)C(=O)c2cc1	Traditional Herbal Isolate=daidzin	-6.9
5416	O[C@@H]1C[C@@H]2[C@](C)([C@@H]3[C@@H]([C@@H]4[C@@](C)([C@H]5[C@@H](C)C6(O[C@@H]5C4)OC[C@H](C)CC6)CC3)CC2)CC1	Traditional Herbal Isolate=tigogenin;sarsasapogenin	-6.9
5427	O[C@H]1C[C@@H]2[C@](C)([C@H]3[C@H]([C@H]4[C@@](C)([C@@H]5[C@H](C)C6(O[C@@H]5C4)OC[C@@H](C)CC6)CC3)CC2)CC1	Traditional Herbal Isolate=tigogenin;sarsasapogenin	-6.9
5428	O[C@@H]1C[C@@H]2[C@](C)([C@H]3[C@H]([C@H]4[C@@](C)([C@H]5[C@H](C)C6(O[C@H]5C4)OC[C@H](C)CC6)CC3)CC2)CC1	Traditional Herbal Isolate=tigogenin;sarsasapogenin	-6.9
5431	O[C@@H]1[C@@]2(C)[C@@H]3[C@@H]([C@@H]4[C@](C)([C@H]5[C@H](C)[C@]6(O[C@@H]5C4)OC[C@@H](C)CC6)CC3)CC[C@H]2CCC1	Traditional Herbal Isolate=spirostanol saponins	-6.9
5435	O[C@@H]1[C@@]2(C)[C@@H]3[C@@H]([C@@H]4[C@](C)([C@H]5[C@H](C)[C@]6(O[C@@H]5C4)OC[C@H](C)CC6)CC3)CC[C@H]2CCC1	Traditional Herbal Isolate=spirostanol saponins	-6.9
5436	O[C@@H]1[C@@]2(C)[C@@H]3[C@@H]([C@@H]4[C@](C)([C@H]5[C@H](C)[C@]6(O[C@@H]5C4)OC[C@H](C)CC6)CC3)CC[C@@H]2CCC1	Traditional Herbal Isolate=spirostanol saponins	-6.9
5442	OC([C@H](/C=C/[C@@H](C)[C@@H]1[C@@]2(C)[C@H](/C(=C\C=C/3\C[C@@H](O)C[C@@H](O)C\3)/CCC2)CC1)C)(C)C	FDA Approved Drug=PARICALCITOL	-6.9
5443	O[C@@H]1C[C@@H]2[C@](C)([C@@H]3[C@@H]([C@@H]4[C@](C)([C@H]5[C@@H](C)[C@]6(O[C@H]5C4)OC[C@@H](C)CC6)CC3)CC2)CC1	Traditional Herbal Isolate=neotigogenin	-6.9
5546	P(=O)(OC[C@@H]1[C@@H](OP(=O)([O-])[O-])[C@@H](O)[C@H](n2c3ncnc(N)c3nc2)O1)([O-])[O-]	Indian Approved Name=quatenium 73	-6.9
5620	O=C1C(C)(C)[C@@H]2[C@@](C)(C=3[C@H]([C@@]4(C)[C@@](C)([C@H]5[C@@](C)([C@H](C(C)C)CC5)CC4)CC=3)CC2)CC1	Traditional Herbal Isolate=arborinone	-6.9
5633	O=C1C(C)(C)[C@H]2[C@](C)(C=3[C@@H]([C@]4(C)[C@](C)([C@@H]5[C@@](C)([C@H](C(C)C)CC5)CC4)CC=3)CC2)CC1	Traditional Herbal Isolate=arborinone	-6.9
5641	O=C([O-])[C@H](NC(=O)c1ccc(CCc2c3C(=O)N=C(N)Nc3[nH]c2)cc1)CCC(=O)[O-]	Australia Approved Name=PEMETREXED DISODIUM FDA Approved Drug=PEMETREXED;PEMETREXED DISODIUM	-6.9
5689	O[C@@H]1C(C)(C)[C@H]2[C@](C)(C=3[C@@H]([C@@]4(C)[C@](C)([C@@H]5[C@](C)([C@@H](C(C)C)CC5)CC4)CC=3)CC2)CC1	Traditional Herbal Isolate=fernenol	-6.9
5702	O[C@@H]1C(C)(C)C=2[C@@H]([C@]3(C)[C@@H]([C@]4(C)[C@](C)([C@H]5[C@@](C)(CC4)CCC(C)(C)C5)CC3)CC=2)CC1	Traditional Herbal Isolate=glutin-5-en-3-ol;glutinol	-6.9
5705	O[C@@H]1C(C)(C)[C@H]2[C@@](C)([C@H]3[C@@](C)([C@]4(C)C([C@@H]5[C@H](C)[C@H](C)CC[C@]5(C)CC4)=CC3)CC2)CC1	Traditional Herbal Isolate=alpha-amyrenol	-6.9
5719	O=C1[C@@H]2[C@](C)([C@@H]3[C@@H]([C@H]4C(=C(C)[C@@]5([C@H](C)[C@H]6[N+H2]C[C@@H](C)C[C@H]6O5)CC4)C3)C1)CC[C@@H](O)C2	Traditional Herbal Isolate=peimisine	-6.9
5774	O[C@@H]1[C@@]2(C)[C@@H]3[C@@H]([C@@H]4[C@](C)([C@H]5[C@@H](C)[C@]6(O[C@H]5C4)OC[C@H](C)CC6)CC3)CC=C2C[C@H](O)C1	Traditional Herbal Isolate=ruscogenin	-6.9
5777	O=C1[C@H]2[C@](C)([C@@H]3[C@H]([C@@H]4[C@H]([C@H]5[C@@H]([C@](O)(C)[C@H]6[N+H](C[C@@H](C)CC6)C5)CC4)C3)C1)CC[C@H](O)C2	Traditional Herbal Isolate=fritillarine;peiminine	-6.9
5782	O([C@H]1[C@H](O)[C@H](O)[C@@H](O)[C@H](CO)O1)c1cc([O-])c2C(=O)C(c3ccc(O)cc3)=COc2c1	Indian Approved Name=genistin	-6.9
5788	O([C@@H]1[C@H](O)[C@H](O)[C@@H](O)[C@@H](CO)O1)c1cc([O-])c2C(=O)C(c3ccc(O)cc3)=COc2c1	Indian Approved Name=genistin	-6.9
5799	O([C@H]1[C@@H](O)[C@H](O)[C@H](O)[C@H](CO)O1)c1cc([O-])c2C(=O)C(c3ccc(O)cc3)=COc2c1	Indian Approved Name=diadzin	-6.9
5838	Clc1ccc([C@@H](N2CC[N+H](Cc3ccc(C(C)(C)C)cc3)CC2)c2ccccc2)cc1	FDA Approved Drug=BUCLIZINE HYDROCHLORIDE	-6.9
5912	O(C[C@]1(C)Oc2c(C)c(C)c(O)c(C)c2CC1)c1ccc(C[C@H]2C(=O)[N-]C(=O)S2)cc1	FDA Approved Drug=TROGLITAZONE	-6.9
5913	O(C[C@@]1(C)Oc2c(C)c(C)c(O)c(C)c2CC1)c1ccc(C[C@@H]2C(=O)[N-]C(=O)S2)cc1	FDA Approved Drug=TROGLITAZONE	-6.9
5914	O(C[C@]1(C)Oc2c(C)c(C)c(O)c(C)c2CC1)c1ccc(C[C@@H]2C(=O)[N-]C(=O)S2)cc1	FDA Approved Drug=TROGLITAZONE	-6.9
5921	O=C1[C@H](C)[C@@]2(C)[C@@H]([C@@]3(C)[C@@H](C(=O)C2)[C@@]2(C)[C@](C)([C@H]4[C@@](C)(CC2)CCC(C)(C)C4)CC3)CC1	Traditional Herbal Isolate=putranjivadione	-6.9
5939	O=C1C(C)(C)[C@H]2[C@](C)([C@@H]3C([C@@]4(C)[C@@](C)([C@@H]([C@H](CC/C=C(\C)/C)C)[C@H](O)C4)CC3)=CC2)CC1	Traditional Herbal Isolate=kulinone	-6.9
5961	O=C(N)C=1C(=O)[C@]2(O)C([O-])=C3C(=O)c4c([O-])cccc4[C@H](C)[C@@H]3[C@@H](O)[C@@H]2[C@@H]([N+H](C)C)C=1[O-]	China Approved Name=doxycycline Indian Approved Name=doxycycline FDA Approved Drug=DOXYCYCLINE;DOXYCYCLINE CALCIUM;DOXYCYCLINE HYCLATE	-6.9
5995	O[C@@H]1[C@]2(C)[C@@H](C=3[C@@](C)([C@]4(C)[C@H]([C@]5(C)[C@H](C(C)(C)[C@@H](O)CC5)CC4)CC=3)CC2)CC(C)(C)C1	Traditional Herbal Isolate=sophoradiol	-6.9
6024	O=C(N[C@@H](COC(=O)C)Cc1ccccc1)[C@H](NC(=O)c1ccccc1)Cc1ccccc1	Traditional Herbal Isolate=aurantiamide acetate	-6.9
6050	O(C)c1ccc(C=2Oc3c(c([O-])cc(O[C@H]4[C@@H](O)[C@H](O)[C@@H](O)[C@H](CO)O4)c3)C(=O)C=2)cc1	Traditional Herbal Isolate=acacetin-7-o-routinosides	-6.9
6059	O(C)c1c(O[C@H]2[C@H](O)[C@H](O)[C@H](O)[C@H](CO)O2)cc2OC=C(c3ccc(O)cc3)C(=O)c2c1	Indian Approved Name=glycitein	-6.9
6069	O(C)c1c(O[C@@H]2[C@@H](O)[C@H](O)[C@H](O)[C@@H](CO)O2)cc2OC=C(c3ccc(O)cc3)C(=O)c2c1	Indian Approved Name=glycitein	-6.9
6074	O(C)c1cc(O[C@H]2[C@H](O)[C@H](O)[C@H](O)[C@@H](CO)O2)c2C(=O)C(c3ccc(O)cc3)=COc2c1	Traditional Herbal Isolate=prunetinoside	-6.9
6117	O=C(N1CCN(c2nc(N)c3c(n2)cc(OC)c(OC)c3)CC1)[C@H]1Oc2c(OC1)cccc2	China Approved Name=doxazosin Indian Approved Name=doxazosin FDA Approved Drug=DOXAZOSIN MESYLATE	-6.9
6168	O=C([O-])[C@]12[C@@H](C=3[C@](C)([C@]4(C)[C@H]([C@@]5(C)[C@H](C(C)(C)[C@H](O)CC5)CC4)CC=3)CC1)CC(C)(C)CC2	Traditional Herbal Isolate=pentacyclic triterpene	-6.9
6172	O=C([O-])[C@]12[C@@H](C=3[C@](C)([C@@]4(C)[C@H]([C@]5(C)[C@H](C(C)(C)[C@H](O)CC5)CC4)CC=3)CC1)CC(C)(C)CC2	Traditional Herbal Isolate=pentacyclic triterpene	-6.9
6195	O=C([O-])[C@@]1(C)[C@@H](O)CC[C@]2(C)[C@@H]1CC[C@]1(C)[C@@]3(C)[C@H]([C@]4(C)[C@H]([C@H](C(=C)C)CC4)CC3)CC[C@H]21	Traditional Herbal Isolate=woodwardic acid	-6.9
6197	O=C([O-])[C@@]1(C)[C@@H](O)CC[C@]2(C)[C@@H]1CC[C@]1(C)[C@]3(C)[C@@H]([C@]4(C)[C@H]([C@H](C(=C)C)CC4)CC3)CC[C@H]21	Traditional Herbal Isolate=woodwardic acid	-6.9
6230	O=C(O[C@@H]1C=2[C@@](C)([C@H]3[C@@](O)([C@@]4(O)[C@](C)([C@H](C5=COC(=O)C=C5)CC4)CC3)C1)CC[C@H](O)C=2)C	Traditional Herbal Isolate=irridoid glycoside-sambacin;lepitidine glycoside;glycoside pharbitin;glycoside rhaphantin	-6.9
6239	O=C1c2c(c(C/C=C(\C)/C)c(O)cc2)O[C@H](c2cc(C/C=C(\C)/C)c3OC(C)(C)C=Cc3c2)C1	Traditional Herbal Isolate=sophoranochromene	-6.9
6282	O[C@@H]1C(C)(C)[C@H]2[C@@](C)([C@H]3[C@](O)(C[C@@]4(C)[C@H]([C@@]5(C)[C@H](C(C)(C)[C@@H](O)CC5)CC4)CC3)CC2)CC1	Traditional Herbal Isolate=tohogenol	-6.9
6284	O[C@@H]1C(C)(C)[C@H]2[C@@](C)([C@H]3[C@](O)(C[C@@]4(C)[C@@H]([C@@]5(C)[C@H](C(C)(C)[C@@H](O)CC5)CC4)CC3)CC2)CC1	Traditional Herbal Isolate=tohogenol	-6.9
6292	O[C@H]1C(C)(C)[C@H]2[C@@](C)([C@H]3[C@](O)(C[C@@]4(C)[C@@H]([C@@]5(C)[C@H](C(C)(C)[C@@H](O)CC5)CC4)CC3)CC2)CC1	Traditional Herbal Isolate=tohogenol	-6.9
6296	O[C@H]1C(C)(C)[C@H]2[C@](C)([C@H]3[C@](O)(C[C@@]4(C)[C@@H]([C@@]5(C)[C@H](C(C)(C)[C@@H](O)CC5)CC4)CC3)CC2)CC1	Traditional Herbal Isolate=tohogenol	-6.9
6319	Fc1c(N2CC[N+H](CC3=C(C)OC(=O)O3)CC2)cc2N3[C@@H](C)SC3=C(C(=O)[O-])C(=O)c2c1	Indian Approved Name=prulifloxacin	-6.9
6324	O([C@H]1[C@@H](O)[C@H](O)[C@H](O)[C@H](CO)O1)c1c(O)c2OC(c3ccc(O)cc3)=C([O-])C(=O)c2c([O-])c1	Traditional Herbal Isolate=herbacetrin	-6.9
6338	O=C1C(C)=C2[C@@]([C@@]34OC(=O)C(C)=C3C[C@@H]3C(=C)CCC[C@]3(C)C4)(O1)C[C@@]1(C)[C@H](C(=C)CCC1)C2	Traditional Herbal Isolate=biatractylolide	-6.9
6345	O(C[C@H]1[C@H](O)[C@@H](O)[C@H](O)[C@@H](O)O1)C1=C(c2cc(O)c(O)cc2)Oc2c(c([O-])cc(O)c2)C1=O	Traditional Herbal Isolate=isoquercetrin;iso-quercitrin	-6.9
6388	O=C(O[C@@H]1[C@@H](n2c3ncnc(NC(=O)CCC)c3nc2)O[C@H]2[C@@H]1OP(=O)([O-])OC2)CCC	NPC Approved Name=bucladesine	-6.9
6407	O=C([O-])[C@@]1(C)C[C@@H]2[C@](C)(CC[C@]3(C)[C@]4(C)[C@@H](C(=O)C=C23)[C@@]2(C)[C@H](C(C)(C)[C@@H](O)CC2)CC4)CC1	Indian Approved Name=glycyrrhiza glabara	-6.9
6443	O[C@@H]1C(C)(C)[C@H]2[C@](C)([C@H]3[C@@](C)(C45[C@@H]([C@@H]6[C@@](O)(C)C[C@@H](/C=C(\C)/C)OC6(OC4)C5)CC3)CC2)CC1	Traditional Herbal Isolate=jujubogenin	-6.9
6456	O[C@H]1[C@@H]([C@H]2[C@@]3(C)[C@](C)(C=4[C@@H]([C@]5(C)[C@@H](C(C)(C)[C@@H](O)CC5)CC=4)CC3)CC2)C[C@@H]([C@@H]2C(C)(C)O2)O1	Traditional Herbal Isolate=melianol	-6.9
6461	O[C@@H]1[C@@H]([C@H]2[C@@]3(C)[C@](C)(C=4[C@H]([C@]5(C)[C@H](C(C)(C)[C@@H](O)CC5)CC=4)CC3)CC2)C[C@@H]([C@@H]2C(C)(C)O2)O1	Traditional Herbal Isolate=melianol	-6.9
6484	O=C(c1c(-c2ccc(O)cc2)sc2c1ccc(O)c2)c1ccc(OCC[N+H]2CCCCC2)cc1	Indian Approved Name=raloxifene Australia Approved Name=RALOXIFENE FDA Approved Drug=RALOXIFENE HYDROCHLORIDE	-6.9
6530	O[C@@](CC/C=C(\C)/C)(C)[C@]1(O)[C@@H]2[C@@H](O)C[C@@H]3[C@@](C)([C@@]2(C)CC1)CC[C@H]1C(C)(C)[C@@H](O)CC[C@@]31C	Traditional Herbal Isolate=betulafolienetetraol	-6.9
6591	O=C(N[C@H]1C(=O)N2[C@@H](C(=O)O[C@H]3OC(=O)c4c3cccc4)C(C)(C)S[C@H]12)[C@@H]([N+H3])c1ccccc1	NPC Approved Name=talampicillin	-6.9
6593	O=C(O[C@H]1[C@@]2(C)[C@@H]([C@]3(C)[C@H](C(C)(C)C(=O)C=C3)C1)CC[C@]1(C)[C@@H](c3cocc3)OC(=O)[C@H]3O[C@]213)C	Traditional Herbal Isolate=gedunin	-6.9
6637	O=C1C(C)=C(C)C[C@H]([C@]2(C)O[C@@H](O)C34O[C@@](O)([C@H]5[C@H]([C@@]6(C)C(=O)CC=CC6=CC5)CC3)CCC24)O1	Traditional Herbal Isolate=withaphysalin	-6.9
6757	O=C(O[C@]1(C)[C@@H]2[C@H](O[C@H]3[C@@H](O)[C@H](O)[C@H](O)[C@H](CO)O3)OC=C[C@]2(O)[C@H](O)C1)/C=C/c1ccccc1	Traditional Herbal Isolate=harpagoside	-6.9
6768	O=C(O[C@H]1[C@@H]2Oc3c(OC(=O)c4cnccc4)ccc4c3[C@@]32[C@H]([C@@H]([N+@H](C)CC3)C4)C=C1)c1cnccc1	US Illegal/Scheduled Drug (Schedule 1)=Nicomorphine	-6.9
6777	S(=O)(=O)(O[C@H]1[C@H](C)[C@@H]2[C@H](O)[C@]3([C@@H](C(=O)[O-])C)[C@H]([C@@]2(C)CC3)C1)c1cc2SC(=S)Nc2cc1	NPC Approved Name=santonic acid	-6.9
6904	ClC(Cl)[C@@H]1[C@@H](C)COC2([C@H](C)[C@H]3[C@@]4(C)[C@@H]([C@H]5[C@@H]([C@@]6(C)[C@@H](O)C[C@@H](O)CC6=CC5)CC4)C[C@@H]3O2)C1	Traditional Herbal Isolate=abamagenin	-6.9
6906	ClC(Cl)[C@H]1[C@H](C)COC2([C@H](C)[C@@H]3[C@]4(C)[C@H]([C@H]5[C@H]([C@]6(C)[C@@H](O)C[C@@H](O)CC6=CC5)CC4)C[C@@H]3O2)C1	Traditional Herbal Isolate=abamagenin	-6.9
6918	O([C@H](C[C@H](C)C1=C2[C@](C)([C@@]3(C)[C@H]([C@@H](O)C2)[C@]2(C)[C@H](C(C)(C)C(=O)CC2)CC3)CC1)[C@@H]1C(C)(C)O1)C(=O)C	Traditional Herbal Isolate=alisol a;alisol b;alisol monoacetate	-6.9
6929	O([C@H](C[C@H](C)C1=C2[C@](C)([C@@]3(C)[C@H]([C@@H](O)C2)[C@]2(C)[C@@H](C(C)(C)C(=O)CC2)CC3)CC1)[C@H]1C(C)(C)O1)C(=O)C	Traditional Herbal Isolate=alisol a;alisol b;alisol monoacetate	-6.9
6949	O=C(O[C@@H]1C[C@]2(O)[C@](C=O)([C@H]3[C@H]([C@]4(O)[C@@](C)([C@H](C5=CC(=O)OC5)CC4)CC3)CC2)CC1)C[N+H](CC)CC	Traditional Herbal Isolate=strophantidin	-6.9
6951	O=C(O[C@@H]1C[C@]2(O)[C@](C=O)([C@H]3[C@@H]([C@]4(O)[C@@](C)([C@H](C5=CC(=O)OC5)CC4)CC3)CC2)CC1)C[N+H](CC)CC	Traditional Herbal Isolate=strophantidin	-6.9
6960	O(C)[C@H]1[C@@H](O)[C@@H](C)O[C@@H](O[C@H]2C[C@H]3[C@](C)([C@H]4[C@@H]([C@]5(O)[C@](C)([C@@H](C6=CC(=O)OC6)CC5)CC4)CC3)CC2)C1	Traditional Herbal Isolate=somalin	-6.9
6988	O([C@@H]1[C@H](O)[C@H](O)[C@@H](O)[C@H](C)O1)[C@@H]1C[C@H]2[C@@](C)([C@H]3[C@H]([C@]4(O)[C@](C)([C@H](C5=CC(=O)OC5)CC4)CC3)CC2)CC1	Traditional Herbal Isolate=evomonoside	-6.9
7006	O=C(C)[C@]1(O)C[C@@H](O[C@@H]2O[C@H](C)[C@H](O)[C@H]([N+H3])C2)c2c([O-])c3C(=O)c4c(OC)cccc4C(=O)c3c([O-])c2C1	China Approved Name=daunorubicin WHO Essential Medicine=daunorubicin Indian Approved Name=daunorubicin hcl;daunorubicin FDA Approved Drug=DAUNORUBICIN CITRATE;DAUNORUBICIN HYDROCHLORIDE	-6.9
7061	O=C(O[C@H]1[C@@H](O)[C@@H]2C(C(=O)OC)=CO[C@@H](O[C@@H]3[C@H](O)[C@H](O)[C@H](O)[C@H](CO)C3)[C@H]2[C@H]1C)/C=C/c1ccccc1	Traditional Herbal Isolate=iridoid glucosides	-6.9
7069	O=C(O[C@H]1[C@@H](O)[C@@H]2C(C(=O)OC)=CO[C@@H](O[C@H]3[C@@H](O)[C@H](O)[C@H](O)[C@@H](CO)C3)[C@H]2[C@H]1C)/C=C/c1ccccc1	Traditional Herbal Isolate=iridoid glucosides	-6.9
7080	O(C)[C@H]1[C@@H](O)[C@H](C)O[C@H](O[C@@H]2C[C@H]3[C@@](C)([C@H]4[C@H]([C@]5(O)[C@](C)([C@@H]([C@@H](O)C5)C5=CC(=O)OC5)CC4)CC3)CC2)C1	Traditional Herbal Isolate=deacetylo-leandrin	-6.9
7092	O(C)[C@H]1[C@@H](O)[C@H](C)O[C@H](O[C@@H]2C[C@H]3[C@@](C)([C@@H]4[C@@H]([C@]5(O)[C@](C)([C@@H]([C@@H](O)C5)C5=CC(=O)OC5)CC4)CC3)CC2)C1	Traditional Herbal Isolate=deacetylo-leandrin	-6.9
7100	O([C@@H]1O[C@@H](C)[C@H](O)[C@H](O)C1)[C@@H]1C[C@]2(O)[C@@](CO)([C@H]3[C@H]([C@]4(O)[C@@](C)([C@H](C5=CC(=O)OC5)CC4)CC3)CC2)CC1	Traditional Herbal Isolate=helveticosol	-6.9
7129	S(=O)(=O)([O-])Cn1c(SCC2=C(C(=O)[O-])N3C(=O)[C@H](NC(=O)[C@H](O)c4ccccc4)[C@H]3SC2)nnn1	FDA Approved Drug=CEFONICID SODIUM	-6.9
7143	O=C(CO)[C@]1(O)C[C@@H](O[C@@H]2O[C@H](C)[C@H](O)[C@H]([N+H3])C2)c2c([O-])c3C(=O)c4c(OC)cccc4C(=O)c3c([O-])c2C1	China Approved Name=doxorubicin Indian Approved Name=doxorubicin WHO Essential Medicine=doxorubicin Australia Approved Name=ADRIAMYCIN;DOXORUBICIN FDA Approved Drug=DOXORUBICIN HYDROCHLORIDE	-6.9
7155	O(C)[C@H]1[C@@H](O)[C@@H](C)O[C@H](O[C@@H]2C[C@@H]3[C@](C)([C@H]4C(=O)[C@@H](O)[C@]5(C)[C@@H](C6=CC(=O)OC6)CC[C@]5(O)[C@H]4CC3)CC2)C1	Traditional Herbal Isolate=caudoside;sarmutoside	-6.9
7167	O(C)[C@@H]1[C@H](O)[C@@H](C)O[C@H](O[C@@H]2C[C@H]3[C@](C)([C@@H]4C(=O)[C@H](O)[C@]5(C)[C@H](C6=CC(=O)OC6)CC[C@@]5(O)[C@@H]4CC3)CC2)C1	Traditional Herbal Isolate=caudoside;sarmutoside	-6.9
7171	O=C[C@]12[C@H]3[C@@H](O)C[C@@]4(C)[C@H](C5=CC(=O)OC5)CC[C@]4(O)[C@@H]3CC[C@H]1C[C@@H](O[C@H]1O[C@@H](C)[C@H](O)[C@@H](OC)C1)CC2	Traditional Herbal Isolate=sinoside	-6.9
7175	O=C[C@]12[C@H]3[C@@H](O)C[C@@]4(C)[C@H](C5=CC(=O)OC5)CC[C@]4(O)[C@H]3CC[C@H]1C[C@@H](O[C@H]1O[C@@H](C)[C@H](O)[C@@H](OC)C1)CC2	Traditional Herbal Isolate=sinoside	-6.9
7177	O=C[C@]12[C@H]3[C@@H](O)C[C@@]4(C)[C@H](C5=CC(=O)OC5)CC[C@]4(O)[C@H]3CC[C@H]1C[C@@H](O[C@H]1O[C@@H](C)[C@H](O)[C@H](OC)C1)CC2	Traditional Herbal Isolate=sinoside	-6.9
7180	O=C[C@]12[C@@H]3[C@@H](O)C[C@@]4(C)[C@H](C5=CC(=O)OC5)CC[C@]4(O)[C@@H]3CC[C@H]1C[C@@H](O[C@H]1O[C@H](C)[C@H](O)[C@@H](OC)C1)CC2	Traditional Herbal Isolate=sinoside	-6.9
7182	O=C[C@]12[C@@H]3[C@@H](O)C[C@@]4(C)[C@H](C5=CC(=O)OC5)CC[C@]4(O)[C@@H]3CC[C@H]1C[C@@H](O[C@H]1O[C@H](C)[C@H](O)[C@H](OC)C1)CC2	Traditional Herbal Isolate=sinoside	-6.9
7184	O=C[C@]12[C@@H]3[C@@H](O)C[C@@]4(C)[C@H](C5=CC(=O)OC5)CC[C@]4(O)[C@H]3CC[C@H]1C[C@@H](O[C@H]1O[C@H](C)[C@H](O)[C@@H](OC)C1)CC2	Traditional Herbal Isolate=sinoside	-6.9
7189	O(C)[C@@H]1[C@@H](O)[C@@H](C)O[C@H](O[C@H]2C[C@@H]3[C@@](C)([C@@H]4[C@@H](O)C(=O)[C@@]5(C)[C@H](C6=CC(=O)OC6)CC[C@@]5(O)[C@H]4CC3)CC2)C1	Traditional Herbal Isolate=sinostroside	-6.9
7195	O(C)[C@H]1[C@H](O)[C@@H](C)O[C@H](O[C@H]2C[C@@H]3[C@@](C)([C@@H]4[C@H](O)C(=O)[C@]5(C)[C@H](C6=CC(=O)OC6)CC[C@@]5(O)[C@@H]4CC3)CC2)C1	Traditional Herbal Isolate=sinostroside	-6.9
7199	O(C)[C@@H]1[C@H](O)[C@@H](C)O[C@H](O[C@@H]2C[C@H]3[C@@](C)([C@@H]4[C@@H](O)C(=O)[C@@]5(C)[C@H](C6=CC(=O)OC6)CC[C@@]5(O)[C@@H]4CC3)CC2)C1	Traditional Herbal Isolate=sinostroside	-6.9
7221	O=C[C@]12[C@@](O)(C[C@@H](O[C@H]3[C@H](O)[C@H](O)[C@H](O)[C@@H](C)O3)CC1)CC[C@H]1[C@]3(O)[C@@](C)([C@H](C4=CC(=O)OC4)CC3)CC[C@H]21	Traditional Herbal Isolate=convallatoxin	-6.9
7222	O=C[C@]12[C@@](O)(C[C@@H](O[C@H]3[C@H](O)[C@H](O)[C@@H](O)[C@@H](C)O3)CC1)CC[C@@H]1[C@]3(O)[C@@](C)([C@H](C4=CC(=O)OC4)CC3)CC[C@H]21	Traditional Herbal Isolate=strophalloside	-6.9
7229	O=C[C@]12[C@@](O)(C[C@@H](O[C@H]3[C@H](O)[C@@H](O)[C@@H](O)[C@@H](C)O3)CC1)CC[C@H]1[C@]3(O)[C@@](C)([C@H](C4=CC(=O)OC4)CC3)CC[C@H]21	Traditional Herbal Isolate=strophalloside	-6.9
7231	O=C[C@]12[C@@](O)(C[C@@H](O[C@H]3[C@@H](O)[C@H](O)[C@@H](O)[C@@H](C)O3)CC1)CC[C@H]1[C@]3(O)[C@@](C)([C@H](C4=CC(=O)OC4)CC3)CC[C@H]21	Traditional Herbal Isolate=strophalloside	-6.9
7233	O=C[C@]12[C@@](O)(C[C@@H](O[C@H]3[C@H](O)[C@H](O)[C@@H](O)[C@@H](C)O3)CC1)CC[C@H]1[C@]3(O)[C@@](C)([C@H](C4=CC(=O)OC4)CC3)CC[C@@H]21	Traditional Herbal Isolate=strophalloside	-6.9
7245	O([C@@H]1[C@H](O)[C@@H](O)[C@@H](O)[C@H](C)O1)[C@@H]1C[C@]2(O)[C@@](CO)([C@H]3[C@@H]([C@]4(O)[C@@](C)([C@H](C5=CC(=O)OC5)CC4)CC3)CC2)CC1	Traditional Herbal Isolate=convallatoxol	-6.9
7258	O([C@@H]1[C@H](O)[C@@H](O)[C@@H](O)[C@H](C)O1)[C@@H]1C[C@]2(O)[C@@](C)([C@@H]3[C@H]([C@]4(O)[C@@](C)([C@H](O)C3)[C@H](C3=CC(=O)OC3)CC4)CC2)CC1	Traditional Herbal Isolate=alpha-antioside	-6.9
7266	O([C@@H]1[C@@H](O)[C@H](O)[C@H](O)[C@H](C)O1)[C@@H]1C[C@]2(O)[C@@](C)([C@H]3[C@H]([C@]4(O)[C@@](C)([C@H](O)C3)[C@H](C3=CC(=O)OC3)CC4)CC2)CC1	Traditional Herbal Isolate=alpha-antioside	-6.9
7279	C(=C\C=C\C=C(/C=C\C=C(\C=C\[C@@]12C(C)(C)CCC[C@@]1(C)O2)/C)\C)(\C=C/C=C(/C=C/[C@H]1C(C)=CCCC1(C)C)\C)/C	Traditional Herbal Isolate=alpha-carotene-5 6-epoxide	-6.9
7301	O(C[C@H]1[C@@H](O)[C@@H](O)[C@H](O)[C@H](Oc2c(C/C=C(\C)/C)c3OC(=O)C=Cc3cc2)O1)[C@H]1[C@@H](O)[C@H](O)[C@H](O)[C@H](CO)O1	Traditional Herbal Isolate=osthenol-7-o-beta-gentiobioside	-6.9
7309	O=C(OCC1=C(C)OC(=O)O1)c1n(Cc2ccc(-c3c(-c4nn[n-]n4)cccc3)cc2)c(CCC)nc1C(O)(C)C	Indian Approved Name=olmesartan FDA Approved Drug=OLMESARTAN MEDOXOMIL	-6.9
7325	O=C([C@](O)(C)[C@@H]1[C@@H](O)C[C@]2(C)[C@]1(C)CC(=O)[C@]1(C)[C@@H]2CC=C2C(C)(C)[C@H](O)C(=O)C[C@H]12)/C=C/C(OC(=O)C)(C)C	Traditional Herbal Isolate=iso-cucurbitacin b	-6.9
7362	O=C[C@]12[C@@](O)(C[C@@H](O[C@H]3[C@@H](O)[C@H](O)[C@@H](O)[C@H](C)O3)CC1)CC[C@@H]1[C@]3(O)[C@@](C)([C@H](O)C[C@H]21)[C@H](C1=CC(=O)OC1)CC3	Traditional Herbal Isolate=alpha-antiarin	-6.9
7364	O=C[C@]12[C@@](O)(C[C@@H](O[C@H]3[C@H](O)[C@H](O)[C@@H](O)[C@@H](C)O3)CC1)CC[C@@H]1[C@]3(O)[C@@](C)([C@H](O)C[C@@H]21)[C@H](C1=CC(=O)OC1)CC3	Traditional Herbal Isolate=alpha-antiarin	-6.9
7365	O=C[C@]12[C@@](O)(C[C@@H](O[C@H]3[C@H](O)[C@@H](O)[C@@H](O)[C@H](C)O3)CC1)CC[C@@H]1[C@]3(O)[C@@](C)([C@H](O)C[C@@H]21)[C@H](C1=CC(=O)OC1)CC3	Traditional Herbal Isolate=alpha-antiarin	-6.9
7368	O=C[C@]12[C@@](O)(C[C@@H](O[C@H]3[C@H](O)[C@@H](O)[C@@H](O)[C@@H](C)O3)CC1)CC[C@H]1[C@]3(O)[C@@](C)([C@H](O)C[C@H]21)[C@H](C1=CC(=O)OC1)CC3	Traditional Herbal Isolate=alpha-antiarin	-6.9
7402	Oc1c(C(C)C)c2c([C@@]3(C)[C@H](C(C)(C)CCC3)CC2)cc1-c1c(O)c(C(C)C)c2c([C@]3(C)[C@H](C(C)(C)CCC3)CC2)c1	Traditional Herbal Isolate=podototarin	-6.9
7411	O=C(O[C@H]1[C@]2(O)O[C@H]3[C@H](O[C@@H]2O[C@@H](C)C1)C[C@H]1[C@@](C=O)([C@H]2[C@@H]([C@]4(O)[C@@](C)([C@@H](C5=CC(=O)OC5)CC4)CC2)CC1)C3)C	Traditional Herbal Isolate=asclepiadin;asclepin	-6.9
7436	O=C(O[C@@H]1[C@H]([C@@]2(C)[C@@](O)([C@H]3[C@H]([C@]4(C)[C@H](C[C@@H](O[C@@H]5O[C@H](C)[C@@H](O)[C@H](OC)C5)CC4)CC3)CC2)C1)C1=CC(=O)OC1)C	Traditional Herbal Isolate=oleandrin	-6.9
7442	O([C@H]1[C@@H](O)[C@H](O)[C@H](O)[C@H](CO)O1)[C@@H]1CC=2[C@@](C)([C@@H]3[C@@H]([C@@H]4[C@](C)([C@@H]([C@H](CC[C@H](C(C)C)CC)C)CC4)CC3)CC=2)CC1	Traditional Herbal Isolate=beta-sitosterol-d-glucoside;beta-sitosterol glucoside;daucosterin;sitosteryl-o-beta-d-glucoside	-6.9
7466	O=C(N[C@@]1(C(C)C)C(=O)N2[C@@H](CC(C)C)C(=O)N3[C@@H]([C@]2(O)O1)CCC3)[C@H]1C[N+@H](C)[C@@H]2[C@@H](c3c4c([nH]cc4C2)ccc3)C1	NPC Approved Name=dihydro-alpha-ergocryptine	-6.9
7468	O=C(N[C@@]1(C(C)C)C(=O)N2[C@@H](CC(C)C)C(=O)N3[C@@H]([C@]2(O)O1)CCC3)[C@H]1C[N+@H](C)[C@H]2[C@@H](c3c4c([nH]cc4C2)ccc3)C1	NPC Approved Name=dihydro-alpha-ergocryptine	-6.9
7482	O(C)c1c(O)c2Oc3c(OC)cc4c([C@@H]([N+H2]CC4)Cc4cc(c(O)cc4)Oc4ccc(cc4)C[C@@H]4[N+@H](C)CCc(c24)c1)c3	Traditional Herbal Isolate=trilobamine	-6.9
7486	O(C)c1c(O)c2Oc3c(OC)cc4c([C@H]([N+H2]CC4)Cc4cc(c(O)cc4)Oc4ccc(cc4)C[C@@H]4[N+@H](C)CCc(c24)c1)c3	Traditional Herbal Isolate=trilobamine	-6.9
7489	O(C)c1c(O)c2Oc3c(OC)cc4c([C@H]([N+H2]CC4)Cc4cc(c(O)cc4)Oc4ccc(cc4)C[C@H]4[N+@@H](C)CCc(c24)c1)c3	Traditional Herbal Isolate=trilobamine	-6.9
7491	S(=O)(=O)(N(C[C@@H](OP(=O)([O-])[O-])[C@H](NC(=O)O[C@@H]1COCC1)Cc1ccccc1)CC(C)C)c1ccc(N)cc1	FDA Approved Drug=FOSAMPRENAVIR CALCIUM	-6.9
7493	O=C(Nc1c([O-])c2C(=O)C3=C([O-])[C@@]4(O)C(=O)C(C(=O)N)=C([O-])[C@H]([N+H](C)C)[C@@H]4C[C@H]3Cc2c(N(C)C)c1)C[N+H2]C(C)(C)C	FDA Approved Drug=TIGECYCLINE	-6.9
7524	O[C@@H]1C=C(C)[C@H](/C=C/C(=C/C=C\C(=C/C=C/C=C(\C=C/C=C(/C=C/[C@]23C(C)(C)C[C@@H](O)C[C@]2(C)O3)\C)/C)\C)/C)C(C)(C)C1	Traditional Herbal Isolate=taraxanthin	-6.9
7532	O[C@H]1C=C(C)[C@H](/C=C/C(=C/C=C\C(=C/C=C/C=C(\C=C/C=C(/C=C/[C@@]23C(C)(C)C[C@H](O)C[C@]2(C)O3)\C)/C)\C)/C)C(C)(C)C1	Traditional Herbal Isolate=taraxanthin	-6.9
7541	Clc1cc2nc(/C=C/c3cc([C@@H](SCC4(CC(=O)[O-])CC4)CCc4c(C(O)(C)C)cccc4)ccc3)ccc2cc1	Indian Approved Name=montelukast;montelukast sodium FDA Approved Drug=MONTELUKAST SODIUM	-6.9
7549	O([C@H]1[C@H](O)[C@@H](O)[C@H]2O[C@H](C)OC[C@H]2O1)[C@H]1[C@@H]2[C@@H]([C@@H](c3cc(OC)c(O)c(OC)c3)c3c1cc1OCOc1c3)C(=O)OC2	China Approved Name=etoposide WHO Essential Medicine=etoposide Indian Approved Name=etoposide Traditional Herbal Isolate=trans-4-methyl-thiobutenylcyanate glucoside;alpha-hydrojuglone-4-beta-d-glucoside;demethyl psychotrin;demethyl wedolactone;etoposide FDA Approved Drug=ETOPOSIDE;ETOPOSIDE PHOSPHATE	-6.9
7601	O(C[C@@H]1[C@@H](O)[C@@H](O)[C@H](O)[C@H](OC2=C(c3ccc(O)cc3)Oc3c(c([O-])cc(O)c3)C2=O)O1)[C@H]1[C@H](O)[C@@H](O)[C@H](O)[C@H](C)O1	Traditional Herbal Isolate=kaempferol-3-robinobioside	-6.9
7610	O(C[C@H]1[C@@H](O)[C@H](O)[C@H](O)[C@H](OC2=C(c3ccc(O)cc3)Oc3c(c([O-])cc(O)c3)C2=O)O1)[C@H]1[C@@H](O)[C@@H](O)[C@H](O)[C@H](C)O1	Traditional Herbal Isolate=kaempferol-3-robinobioside	-6.9
7626	O(C)c1c(O)c2Oc3ccc(cc3)C[C@@H]3[N+@H](C)CCc4c3c(c(O)c(OC)c4)Oc3ccc(cc3)C[C@H]3[N+@H](C)CCc(c23)c1	Traditional Herbal Isolate=d-isochondrodendrine;iso-chondrodendrine	-6.9
7681	Clc1c(OC)cc2cc1N(C)C(=O)C[C@@H](OC(=O)C)[C@]1(C)O[C@@H]1[C@H](C)C1OC(=O)NC(O)([C@@H](OC)/C=C/C=C(/C)\C2)C1	Traditional Herbal Isolate=maytanacine	-6.9
7693	O(C)c1c([C@H]2[C@H](O)[C@@H](O)[C@H](O)[C@H](CO)O2)c([O-])c2C(=O)C=C(c3ccc(O[C@H]4[C@@H](O)[C@@H](O)[C@H](O)[C@H](CO)O4)cc3)Oc2c1	Traditional Herbal Isolate=flavocommelitin	-6.9
7699	O(C)c1c([C@H]2[C@@H](O)[C@@H](O)[C@H](O)[C@@H](CO)O2)c([O-])c2C(=O)C=C(c3ccc(O[C@H]4[C@@H](O)[C@H](O)[C@H](O)[C@@H](CO)O4)cc3)Oc2c1	Traditional Herbal Isolate=flavocommelitin	-6.9
7705	O(C)c1c(OC)cc2c3[C@@H]([N+@H](C)CC2)Cc2ccc(Oc4c(O)ccc(c4)C=4C(=O)c5c(cc(OC)c(Oc13)c5)CCN=4)cc2	Traditional Herbal Isolate=stepinonine	-6.9
7719	O(C[C@H]1[C@H](O)[C@H](O)[C@@H](O)[C@H](OC2=C(c3cc(O)c(O)cc3)Oc3c(c([O-])cc(O)c3)C2=O)O1)[C@H]1[C@H](O)[C@H](O)[C@H](O)[C@@H](C)O1	Traditional Herbal Isolate=6-o-rhamnosyl cophoroside Indian Approved Name=citrus bioflavonoid;rutoside	-6.9
7733	O(C)c1c(O)c2Oc3c(OC)cc4c([C@H]([N+@H](C)CC4)Cc4cc(c(OC)cc4)Oc4ccc(cc4)C[C@H]4[N+@H](C)CCc(c24)c1)c3	Traditional Herbal Isolate=homoaromoline	-6.9
7735	O(C)c1c(O)c2Oc3c(OC)cc4c([C@H]([N+@H](C)CC4)Cc4cc(c(OC)cc4)Oc4ccc(cc4)C[C@H]4[N+@@H](C)CCc(c24)c1)c3	Traditional Herbal Isolate=homoaromoline	-6.9
7739	O(C)c1c(O)c2Oc3ccc(cc3)C[C@H]3[N+@H](C)CCc4c3cc(c(OC)c4)Oc3c(OC)ccc(c3)C[C@@H]3[N+@@H](C)CCc(c23)c1	Traditional Herbal Isolate=hayatinine	-6.9
7759	O(C)c1c(O)c2Oc3ccc(cc3)C[C@H]3[N+@H](C)CCc4c3cc(c(OC)c4)Oc3c(OC)ccc(c3)C[C@@H]3[N+@@H](C)CCc(c23)c1	Traditional Herbal Isolate=hayatidine	-6.9
7778	O=C([O-])CC[C@@H]1N(C)C(=O)/C(=C(/[O-])\C=C\C=C\C=C\C=C\C=C\C(=C/[C@H]([C@H](O[C@@H]2O[C@@H](C)[C@H](O)[C@H](O)C2)C(C)C)C)\C)/C1=O	Traditional Herbal Isolate=7-hydroxylathyrol;7-methoxynorwogonin	-6.9
7811	O(C)c1c(Oc2c(O)ccc(C[C@@H]3[N+@H](C)CCc4c3cc(O)c(OC)c4)c2)cc2[C@@H](Cc3ccc(OC)cc3)[N+@H](C)CCc2c1	Traditional Herbal Isolate=iso-liensinine	-6.9
7812	O(C)c1c(Oc2c(O)ccc(C[C@@H]3[N+@H](C)CCc4c3cc(O)c(OC)c4)c2)cc2[C@@H](Cc3ccc(OC)cc3)[N+@@H](C)CCc2c1	Traditional Herbal Isolate=iso-liensinine	-6.9
7877	S(CC1=C(C(=O)[O-])N2C(=O)[C@](OC)(NC(=O)[C@@H](NC(=O)N3C(=O)C(=O)N(CC)CC3)[C@H](O)C)[C@H]2SC1)c1n(C)nnn1	NPC Approved Name=cefbuperazone	-6.9
7884	O(C)c1c(OC)cc2c([C@H](Cc3cc(Oc4ccc(C[C@H]5[N+@H](C)CCc6c5cc(OC)c(OC)c6)cc4)c(O)cc3)[N+@@H](C)CC2)c1	Traditional Herbal Isolate=dauricine	-6.9
8007	Oc1c(Cc2c(O)c(-n3nc4c(n3)cccc4)cc(C(CC(C)(C)C)(C)C)c2)cc(C(CC(C)(C)C)(C)C)cc1-n1nc2c(n1)cccc2	Indian Approved Name=bisoctrizole	-6.9
8024	O=C([O-])[C@@H]1[C@H](O)C[C@]2(O)O[C@H]1C[C@@H](O[C@@H]1[C@H](O)[C@H]([N+H3])[C@H](O)[C@H](C)O1)/C=C/C=C/C=C/C=C/C[C@H](C)OC(=O)/C=C/[C@H]1O[C@@H]1C[C@@H](O)C2	Indian Approved Name=natamycin FDA Approved Drug=NATAMYCIN	-6.9
8038	O(C)c1c(OC)cc2[C@H]3[N+@@H](C)CCc2c1Oc1c2OCOc2c(OC)c2c1[C@@H]([N+@H](C)CC2)Cc1ccc(Oc2c(OC)ccc(c2)C3)cc1	Traditional Herbal Isolate=thalphinine	-6.9
8048	O(C)c1c(OC)cc2[C@@H]3[N+@@H](C)CCc2c1Oc1c2OCOc2c(OC)c2c1[C@H]([N+@@H](C)CC2)Cc1ccc(Oc2c(OC)ccc(c2)C3)cc1	Traditional Herbal Isolate=thalphinine	-6.9
8061	O=C1[C@@H]([C@H](O)CCCCC)[C@H](O)C[C@H](O)C[C@@H](O)C[C@@H](O)C[C@@H](O)C[C@H](O)[C@@H](O)[C@@H](O)/C(/C)=C\C=C\C=C\C=C\C=C\[C@@H](O)[C@@H](C)O1	NPC Approved Name=fungichromin	-6.9
8075	O=C(N[C@@H](C(C)(C)C)C(=O)N1[C@H](C(=O)N[C@@H](C(=O)C(=O)NC2CC2)CCC)[C@H]2[C@H](C1)CCC2)[C@@H](NC(=O)c1nccnc1)C1CCCCC1	FDA Approved Drug=TELAPREVIR	-6.9
8086	O=[N+]([O-])c1cc([C@@H]2[C@H](C(=O)OC)[C@](C)(c3ccc(N4CC[N+H](C(c5ccccc5)c5ccccc5)CC4)cc3)[N+H2]C(C)=C2C(=O)OC=C)ccc1	NPC Approved Name=ae0047	-6.9
8125	O(C[C@@H]1[C@H](O)[C@H](O)[C@H](O)[C@H](O[C@@H]2C[C@]3(O)[C@@](CO)([C@@H]4[C@@H]([C@]5(O)[C@@](C)([C@H](C6=CC(=O)OC6)CC5)CC4)CC3)CC2)O1)[C@@H]1[C@H](C)O[C@H](O)C[C@@H]1O	Traditional Herbal Isolate=erysimosol	-6.9
8126	O(C[C@H]1[C@H](O)[C@H](O)[C@@H](O)[C@H](O[C@@H]2C[C@]3(O)[C@@](CO)([C@H]4[C@@H]([C@]5(O)[C@@](C)([C@H](C6=CC(=O)OC6)CC5)CC4)CC3)CC2)O1)[C@@H]1[C@H](C)O[C@H](O)C[C@@H]1O	Traditional Herbal Isolate=erysimosol	-6.9
8131	O(C[C@@H]1[C@H](O)[C@H](O)[C@@H](O)[C@H](O[C@@H]2C[C@]3(O)[C@@](CO)([C@H]4[C@H]([C@]5(O)[C@@](C)([C@H](C6=CC(=O)OC6)CC5)CC4)CC3)CC2)O1)[C@@H]1[C@@H](C)O[C@H](O)C[C@H]1O	Traditional Herbal Isolate=erysimosol	-6.9
8132	O(C[C@@H]1[C@H](O)[C@H](O)[C@@H](O)[C@H](O[C@@H]2C[C@]3(O)[C@@](CO)([C@H]4[C@H]([C@]5(O)[C@@](C)([C@H](C6=CC(=O)OC6)CC5)CC4)CC3)CC2)O1)[C@@H]1[C@H](C)O[C@H](O)C[C@@H]1O	Traditional Herbal Isolate=erysimosol	-6.9
8133	O(C[C@H]1[C@H](O)[C@@H](O)[C@H](O)[C@H](O[C@@H]2C[C@]3(O)[C@@](CO)([C@H]4[C@H]([C@]5(O)[C@@](C)([C@H](C6=CC(=O)OC6)CC5)CC4)CC3)CC2)O1)[C@@H]1[C@H](C)O[C@H](O)C[C@H]1O	Traditional Herbal Isolate=erysimosol	-6.9
8143	O=C(OC)N[C@H](C(=O)NN(C[C@@H](O)[C@@H](NC(=O)[C@H](NC(=O)OC)C(C)(C)C)Cc1ccccc1)Cc1ccc(-c2ncccc2)cc1)C(C)(C)C	China Approved Name=atazanavir WHO Essential Medicine=atazanavir Indian Approved Name=atazanavir FDA Approved Drug=ATAZANAVIR SULFATE	-6.9
8175	O=C([O-])[C@@H]1[C@@H](O)[C@@H](O)[C@H](O)[C@H](O[C@@H]2[C@H](O)[C@H](O)[C@H](CO)O[C@H]2Oc2c(O)cc3/[N+](=C\C=C\4/C=C(C(=O)[O-])[N+H2][C@H](C(=O)[O-])C/4)/[C@@H](C(=O)[O-])Cc3c2)O1	Traditional Herbal Isolate=iso-amaranthin	-6.9
8186	O=C([O-])[C@@H]1[C@H](O)[C@@H](O)[C@@H](O)[C@H](O[C@H]2[C@H](O)[C@H](O)[C@H](CO)O[C@H]2Oc2c(O)cc3/[N+](=C\C=C\4/C=C(C(=O)[O-])[N+H2][C@@H](C(=O)[O-])C/4)/[C@@H](C(=O)[O-])Cc3c2)O1	Traditional Herbal Isolate=iso-amaranthin	-6.9
8202	O=C[C@]12[C@](O)(C[C@@H](O[C@@H]3[C@@H](O)[C@H](O)[C@H](O[C@@H]4[C@@H](O)[C@H](O)[C@H](O)[C@@H](CO)O4)[C@H](C)O3)CC1)CC[C@@H]1[C@]3(O)[C@@](C)([C@@H](C4=COC(=O)C=C4)CC3)CC[C@@H]21	Traditional Herbal Isolate=hellebrin	-6.9
8273	O=C([O-])[C@@H](CC)[C@H]1O[C@H]([C@H]([C@@H](O)[C@H](C(=O)[C@@H](CC)[C@H]2[C@H](C)C[C@@H](C)[C@@]3(O2)O[C@@]2([C@H](O)C=C3)O[C@@](C)([C@H]3O[C@H](C)[C@@](O)(CC)CC3)CC2)C)C)[C@@H](C)CC1	NPC Approved Name=salinomycin	-6.9
8282	O=C([O-])[C@@H](CC)[C@@H]1[C@H](C)C[C@H](C)[C@@H]([C@H]([C@@H](O)[C@H](C(=O)[C@@H](CC)[C@H]2[C@H](C)C[C@@H](C)[C@@]3(O2)O[C@@]2([C@H](O)C=C3)O[C@@](C)([C@H]3O[C@H](C)[C@@](O)(CC)CC3)CC2)C)C)O1	NPC Approved Name=narasino	-6.9
8284	S(CC[C@@H](NC(=O)[C@H](NC(=O)CCNC(=O)OCC(C)C)Cc1c2c([nH]c1)cccc2)C(=O)N[C@@H](C(=O)N[C@@H](C(=O)N)Cc1ccccc1)CC(=O)[O-])C	FDA Approved Drug=PENTAGASTRIN	-6.9
8291	P(=O)(OP(=O)(OP(=O)(OC[C@H]1[C@@H](O)C[C@@H](N2C(=O)N=C(N)C=C2)O1)[O-])[O-])(OP(=O)(OC[C@H]1[C@H](O)[C@@H](O)[C@H](N2C(=O)NC(=O)C=C2)O1)[O-])[O-]	NPC Approved Name=denufosol [inn]	-6.9
8353	P(=O)(OP(=O)(OC[C@H]1[C@H](O)[C@@H](O)[C@@H](n2c3ncnc(N)c3nc2)O1)[O-])(OC[C@H](O)[C@@H](O)[C@@H](O)CN1c2c(N=C3C(=O)NC(=O)N=C13)cc(C)c(C)c2)[O-]	NPC Approved Name=flavitan	-6.9
8374	P(=O)(O[C@H](C(=O)[O-])CCC(=O)[O-])(OC[C@H]1[C@@H](O)[C@H](O)[C@@H](OC[C@H](O)[C@@H](O)[C@@H](O)Cc2ccc(N[C@H](C)[C@H]3N(C=O)[C@H]4C(=O)[N+H]=C(N)NC4=[N+H][C@@H]3C)cc2)O1)[O-]	Indian Approved Name=alpha lipioic acid	-6.9
8419	O=C(OC1C(OC(=O)c2cnccc2)C(OC(=O)c2cnccc2)C(OC(=O)c2cnccc2)C(OC(=O)c2cnccc2)C1OC(=O)c1cnccc1)c1cnccc1	NPC Approved Name=vascunicol	-6.9
8454	O(C)[C@H]1[C@H](O)[C@H](O[C@@H]2[C@@H](C)O[C@@H](O[C@H]3[C@H](C)O[C@@H](O[C@@H]4C[C@@H]5[C@@](C)([C@H]6[C@](O)([C@@]7(O)[C@](C)([C@H](O)C6)[C@@](O)([C@@H](O)C)CC7)CC5)CC4)C[C@H]3OC)C[C@@H]2OC)O[C@@H](C)[C@H]1O	Traditional Herbal Isolate=tenacissoside a	-6.9
8458	O(C)[C@H]1[C@H](O)[C@@H](O[C@@H]2[C@@H](C)O[C@H](O[C@H]3[C@H](C)O[C@@H](O[C@@H]4C[C@@H]5[C@@](C)([C@@H]6[C@](O)([C@@]7(O)[C@](C)([C@H](O)C6)[C@@](O)([C@@H](O)C)CC7)CC5)CC4)C[C@H]3OC)C[C@@H]2OC)O[C@@H](C)[C@H]1O	Traditional Herbal Isolate=tenacissoside a	-6.9
8464	O(C)[C@H]1[C@H](O)[C@H](O[C@@H]2[C@@H](C)O[C@H](O[C@H]3[C@H](C)O[C@@H](O[C@@H]4C[C@@H]5[C@@](C)([C@H]6[C@](O)([C@@]7(O)[C@](C)([C@H](O)C6)[C@@](O)([C@@H](O)C)CC7)CC5)CC4)C[C@H]3OC)C[C@@H]2OC)O[C@H](C)[C@H]1O	Traditional Herbal Isolate=tenacissoside a	-6.9
8466	O(C)[C@@H]1[C@H](O)[C@@H](O[C@@H]2[C@H](C)O[C@H](O[C@H]3[C@H](C)O[C@@H](O[C@@H]4C[C@@H]5[C@@](C)([C@H]6[C@](O)([C@@]7(O)[C@](C)([C@H](O)C6)[C@@](O)([C@@H](O)C)CC7)CC5)CC4)C[C@H]3OC)C[C@@H]2OC)O[C@H](C)[C@H]1O	Traditional Herbal Isolate=tenacissoside a	-6.9
8558	O=C([O-])[C@]12[C@@H](C=3[C@](C)([C@@]4(C)[C@H]([C@]5(C)[C@@H](C(C)(C)[C@@H](O[C@H]6[C@H](O[C@H]7[C@H](O[C@H]8[C@@H](O)[C@H](O)[C@@H](O)[C@@H](C)O8)[C@@H](O)[C@@H](O)[C@@H](CO)O7)[C@H](O)[C@H](O)CO6)CC5)CC4)CC=3)CC1)CC(C)(C)CC2	Traditional Herbal Isolate=raddeanin a	-6.9
8598	O=C([O-])[C@@H]1[C@H](O[C@H]2[C@@H](O)[C@@H](O)[C@@H](CO)O2)[C@@H](O)[C@H](O)[C@@H](O[C@@H]2C(C)(C)[C@H]3[C@@](C)([C@H]4[C@](C)([C@@]5(C)C([C@H]6[C@@](C(=O)O[C@H]7[C@@H](O)[C@H](O)[C@H](O)[C@H](CO)O7)(CC5)CCC(C)(C)C6)=CC4)CC3)CC2)O1	Traditional Herbal Isolate=araloside a	-6.9
8635	S(C(=O)/C=C/c1cc(OC)c(O)cc1)CCNC(=O)CCNC(=O)[C@@H](O)C(COP(=O)(OP(=O)(OC[C@H]1[C@H](OP(=O)([O-])[O-])[C@@H](O)[C@@H](n2c3ncnc(N)c3nc2)O1)[O-])[O-])(C)C	Traditional Herbal Isolate=feruloyl-p-coumaroylmethane	-6.9
8638	S(C(=O)/C=C/c1cc(OC)c(O)cc1)CCNC(=O)CCNC(=O)[C@@H](O)C(COP(=O)(OP(=O)(OC[C@H]1[C@H](OP(=O)([O-])[O-])[C@@H](O)[C@@H](n2c3ncnc(N)c3nc2)O1)[O-])[O-])(C)C	Traditional Herbal Isolate=feruloyl-p-coumaroylmethane	-6.9
8639	O=C(OC[C@H]1[C@H](OC(=O)c2cc(O)c(O)c(O)c2)[C@H](OC(=O)c2cc(O)c(O)c(O)c2)[C@@H](OC(=O)c2cc(O)c(O)c(O)c2)[C@H](OC(=O)c2cc(O)c(O)c(O)c2)O1)c1cc(O)c(O)c(O)c1	Traditional Herbal Isolate=penta-o-galloyl-beta-d-glucose	-6.9
8646	O=C([O-])[C@@H]1[C@H](O)[C@@H](O)[C@H](O[C@H]2[C@@H](O)[C@H](O)[C@H](O)[C@H](CO)O2)[C@H](O[C@H]2C(C)(C)[C@@H]3[C@@](C)([C@@H]4[C@](C)([C@@]5(C)C([C@H]6[C@@](C(=O)O[C@H]7[C@@H](O)[C@H](O)[C@H](O)[C@H](CO)O7)(CC5)CCC(C)(C)C6)=CC4)CC3)CC2)O1	Traditional Herbal Isolate=ginsenoside ro	-6.9
8651	O(CCO)[C@H]1[C@@H](OC)C[C@H](C[C@@H](C)[C@@H]2OC(=O)[C@H]3N(C(=O)C(=O)[C@]4(O)[C@H](C)CC[C@H](O4)C[C@@H](OC)/C(/C)=C\C=C\C=C/[C@@H](C)C[C@H](C)C(=O)[C@H](OC)[C@@H](O)/C(/C)=C\[C@@H](C)C(=O)C2)CCCC3)CC1	FDA Approved Drug=EVEROLIMUS	-6.9
8657	O=C(O[C@H]1[C@H](O)[C@H](O)[C@H](O)[C@H](CO[C@@H]2[C@H](O)[C@@H](O)[C@H](O[C@H]3[C@@H](O)[C@H](O)[C@@H](O)[C@@H](C)O3)[C@@H](CO)O2)O1)[C@@]12[C@H]([C@@H](C)[C@@H](C)CC1)C=1[C@@](C)([C@@]3(C)[C@H]([C@@]4(C)[C@H]([C@H](O)C3)[C@](CO)(C)[C@@H](O)[C@@H](O)C4)CC=1)CC2	Traditional Herbal Isolate=madecassoside	-6.9
8663	O=C(O[C@H]1[C@H](O)[C@@H](O)[C@H](O)[C@@H](CO[C@H]2[C@H](O)[C@@H](O)[C@@H](O[C@@H]3[C@@H](O)[C@@H](O)[C@@H](O)[C@@H](C)O3)[C@H](CO)O2)O1)[C@@]12[C@H]([C@H](C)[C@@H](C)CC1)C=1[C@](C)([C@@]3(C)[C@@H]([C@@]4(C)[C@@H]([C@@H](O)C3)[C@@](CO)(C)[C@H](O)[C@@H](O)C4)CC=1)CC2	Traditional Herbal Isolate=madecassoside	-6.9
8703	O=C(NCC(=O)N)[C@H](NC(=O)[C@H]1N(C(=O)[C@@H]2NC(=O)[C@@H](CC(=O)N)NC(=O)[C@@H]([C@H](O)C)NC(=O)[C@@H]([C@@H](CC)C)NC(=O)[C@@H](Cc3ccc(O)cc3)NC(=O)[C@H]([N+H3])CSSC2)CCC1)CC(C)C	Indian Approved Name=urofollitrophin FDA Approved Drug=UROFOLLITROPIN	-6.9
8725	S(C[C@H]1C(=O)C[C@H]2C(=O)N[C@H](c3ccccc3)C(=O)O[C@H](C)[C@@H](NC(=O)c3c(O)cccn3)C(=O)N[C@@H](CC)C(=O)N3[C@@H](C(=O)N(C)[C@@H](Cc4ccc(N(C)C)cc4)C(=O)N2C1)CCC3)[C@H]1C2CC[N+H](C1)CC2	FDA Approved Drug=QUINUPRISTIN	-6.9
8745	O([C@H]1[C@@H](O)[C@H](O)[C@H](O[C@H]2CC=3[C@@](C)([C@@H]4[C@@H]([C@]5(O)[C@@](C)([C@H]6[C@H](C)C7(O[C@H]6C5)OC[C@@H](C)CC7)CC4)CC=3)CC2)O[C@H]1CO)[C@H]1[C@@H](O[C@H]2[C@@H](O)[C@@H](O)[C@H](O)[C@@H](CO)O2)[C@H](O[C@H]2[C@H](O)[C@@H](O)[C@H](O)CO2)[C@H](O)[C@H](CO)O1	Traditional Herbal Isolate=steroidal saponin pod-ii	-6.9
8751	O([C@H]1[C@H](O)[C@H](O)[C@@H](O[C@H]2CC=3[C@](C)([C@@H]4[C@H]([C@]5(O)[C@](C)([C@H]6[C@H](C)C7(O[C@H]6C5)OC[C@@H](C)CC7)CC4)CC=3)CC2)O[C@@H]1CO)[C@H]1[C@@H](O[C@@H]2[C@@H](O)[C@@H](O)[C@@H](O)[C@H](CO)O2)[C@@H](O[C@H]2[C@H](O)[C@@H](O)[C@@H](O)CO2)[C@@H](O)[C@@H](CO)O1	Traditional Herbal Isolate=steroidal saponin pod-ii	-6.9
8777	O=C(O[C@@H]1[C@@H]2[C@H](O)[C@H](OC(=O)c3cc(O)c(O)c(O)c3)O[C@@H]1COC(=O)c1c(c(O)c(O)c(O)c1)-c1c(O)c(O)c(Oc3c(O)c(O)c(O)cc3C(=O)[O-])cc1C(=O)O2)[C@@H]1C=2c3c(O)c(O)c(O)cc3C(=O)OC=2C(=O)C1	Traditional Herbal Isolate=repandusinin	-6.9
8788	O=C(NCC(=O)N)[C@@H](NC(=O)[C@@H]1N(C(=O)[C@@H]2NC(=O)[C@@H](CC(=O)N)NC(=O)[C@@H](CCC(=O)N)NC(=O)[C@H](Cc3ccccc3)NC(=O)[C@@H](Cc3ccc(O)cc3)NC(=O)[C@H]([N+H3])CSSC2)CCC1)CCC/[N+H]=C(\N)/N	FDA Approved Drug=VASOPRESSIN TANNATE	-6.9
8803	O=C([O-])[C@H]1[C@H](O)CC2(O)OC1C[C@@H](O[C@@H]1[C@@H](O)[C@@H]([N+H3])[C@@H](O)[C@H](C)O1)C=CC=CC=CC=CC=CC=CC=C[C@@H](C)[C@H]([C@@H](C[C@H]([C@@H](O)CC(=O)c1ccc(N)cc1)C)C)OC(=O)CC(=O)CCCC(=O)C[C@@H](O)C[C@@H](O)C[C@@H](O)C2	FDA Approved Drug=CANDICIDIN	-6.9
8902	O=C(O[C@@H]1[C@@H](O)[C@H](O)[C@@H](O)[C@@H](CO[C@H]2[C@H](O)[C@@H](O)[C@H](O[C@@H]3[C@@H](O)[C@@H](O)[C@H](O)[C@H](C)O3)[C@H](CO)O2)O1)[C@]12[C@H](C=3[C@@](C)([C@@]4(C)[C@H]([C@]5(C)[C@H](C(C)(C)[C@@H](O[C@@H]6[C@@H](O[C@@H]7[C@@H](O)[C@H](O)[C@H](O)[C@H](C)O7)[C@@H](O)[C@@H](O)CO6)CC5)CC4)CC=3)CC1)CC(C)(C)CC2	Traditional Herbal Isolate=hederasaponin b	-6.9
8932	O=C(N[C@@H]1[C@H](C)OC(=O)[C@H](C(C)C)N(C)C(=O)CN(C)C(=O)[C@H]2N(C(=O)[C@H](C(C)C)NC1=O)CCC2)c1c2N=C3C(C(=O)N[C@@H]4[C@H](C)OC(=O)[C@H](C(C)C)N(C)C(=O)CN(C)C(=O)[C@H]5N(C(=O)[C@@H](C(C)C)NC4=O)CCC5)=C(N)C(=O)C(C)=C3Oc2c(C)cc1	China Approved Name=actinomycin WHO Essential Medicine=dactinomycin Indian Approved Name=dactinomycin FDA Approved Drug=DACTINOMYCIN	-6.9
8942	O=C(N[C@@H]1[C@@H](C)OC(=O)[C@@H](C(C)C)N(C)C(=O)CN(C)C(=O)[C@H]2N(C(=O)[C@@H](C(C)C)NC1=O)CCC2)c1c2N=C3C(C(=O)N[C@H]4[C@@H](C)OC(=O)[C@H](C(C)C)N(C)C(=O)CN(C)C(=O)[C@H]5N(C(=O)[C@H](C(C)C)NC4=O)CCC5)=C(N)C(=O)C(C)=C3Oc2c(C)cc1	China Approved Name=actinomycin WHO Essential Medicine=dactinomycin Indian Approved Name=dactinomycin FDA Approved Drug=DACTINOMYCIN	-6.9
8943	O=C(N[C@H]1[C@@H](C)OC(=O)[C@@H](C(C)C)N(C)C(=O)CN(C)C(=O)[C@H]2N(C(=O)[C@@H](C(C)C)NC1=O)CCC2)c1c2N=C3C(C(=O)N[C@H]4[C@@H](C)OC(=O)[C@H](C(C)C)N(C)C(=O)CN(C)C(=O)[C@H]5N(C(=O)[C@H](C(C)C)NC4=O)CCC5)=C(N)C(=O)C(C)=C3Oc2c(C)cc1	China Approved Name=actinomycin WHO Essential Medicine=dactinomycin Indian Approved Name=dactinomycin FDA Approved Drug=DACTINOMYCIN	-6.9
8944	O=C(N[C@H]1[C@@H](C)OC(=O)[C@@H](C(C)C)N(C)C(=O)CN(C)C(=O)[C@H]2N(C(=O)[C@@H](C(C)C)NC1=O)CCC2)c1c2N=C3C(C(=O)N[C@@H]4[C@H](C)OC(=O)[C@@H](C(C)C)N(C)C(=O)CN(C)C(=O)[C@H]5N(C(=O)[C@@H](C(C)C)NC4=O)CCC5)=C(N)C(=O)C(C)=C3Oc2c(C)cc1	China Approved Name=actinomycin WHO Essential Medicine=dactinomycin Indian Approved Name=dactinomycin FDA Approved Drug=DACTINOMYCIN	-6.9
8989	O=C(N[C@@H](C(=O)N[C@H](C(=O)N[C@@H](C(=O)N[C@H](C(=O)N1[C@@H](C(=O)NCC(=O)N)CCC1)CCCNC(=[N+H2])N)CC(C)C)Cc1cc2c(cc1)cccc2)Cc1ccc(O)cc1)[C@@H](NC(=O)[C@@H](NC(=O)[C@@H](NC(=O)[C@H]1NC(=O)CC1)Cc1nc[nH]c1)Cc1c2c([nH]c1)cccc2)CO	Indian Approved Name=nafarelin FDA Approved Drug=NAFARELIN ACETATE	-6.9
8996	O=C(N[C@@H](C(=O)N[C@H](C(=O)N[C@H](C(=O)N[C@@H](C(=O)N1[C@@H](C(=O)NCC(=O)N)CCC1)CCCNC(=[N+H2])N)CC(C)C)Cc1cc2c(cc1)cccc2)Cc1ccc(O)cc1)[C@@H](NC(=O)[C@@H](NC(=O)[C@H](NC(=O)[C@H]1NC(=O)CC1)Cc1nc[nH]c1)Cc1c2c([nH]c1)cccc2)CO	Indian Approved Name=nafarelin FDA Approved Drug=NAFARELIN ACETATE	-6.9
9088	O=C(OC[C@H]1[C@H](OC(=O)c2cc(OC(=O)c3cc(O)c(O)c(O)c3)c(O)c(O)c2)[C@H](OC(=O)c2cc(OC(=O)c3cc(O)c(O)c(O)c3)c(O)c(O)c2)[C@@H](OC(=O)c2cc(OC(=O)c3cc(O)c(O)c(O)c3)c(O)c(O)c2)[C@@H](OC(=O)c2cc(OC(=O)c3cc(O)c(O)c(O)c3)c(O)c(O)c2)O1)c1cc(OC(=O)c2cc(O)c(O)c(O)c2)c(O)c(O)c1	Traditional Herbal Isolate=gallotannic acid Indian Approved Name=collagen peptiside	-6.9
9104	O=C(O[C@H]1[C@@H](C=O)OC(=O)c2c(c(O)c(O)c(O)c2)Oc2c(O)c(O)c3-c4c(O)c(O)c(O)cc4C(=O)O[C@H]4[C@@H](OC(=O)c5cc(O)c(O)c(O)c5)C([C@H](OC(=O)c5cc(O)c(O)c(O)c5)O[C@H]4COC(=O)c3c2)OC(=O)c2c(c(O)c(O)c(O)c2)Oc2c(O)c(O)c3-c4c(O)c(O)c(O)cc4C(=O)OC[C@H](O)C1OC(=O)c3c2)c1cc(O)c(O)c(O)c1	Traditional Herbal Isolate=woodfordin a	-6.9
2250	O=C([O-])[C@H](C)c1c2c(c(-c3ccccc3)cc1)cccc2	NPC Approved Name=vedaprofen	-6.8
2565	C[N+H]1CCC(=C2c3c(cccc3)C=Cc3c2cccc3)CC1	Indian Approved Name=cyproheptadine hcl;cyproheptadine FDA Approved Drug=CYPROHEPTADINE HYDROCHLORIDE	-6.8
2600	O[C@@H]1[C@H](c2ccc(O)cc2)Oc2c([C@H]1O)c(O)cc(O)c2	Traditional Herbal Isolate=leucopelargonidin	-6.8
3146	O=C(O[C@@H]1[C@@]2(C)[C@H]([C@H]3C(=C4C(=CC(=O)CC4)CC3)C=C2)CC1)C	NPC Approved Name=trenbolone acetate	-6.8
3390	S(=O)([O-])(=NC(=O)N[N+H]1C[C@H]2[C@@H](C1)CCC2)c1ccc(C)cc1	China Approved Name=gliclazide Indian Approved Name=gliclazide Australia Approved Name=GLICLAZIDE	-6.8
3636	O(C)c1c(O)c-2c3c(c1)cc[n+](C)c3C(=O)c1c-2cc2OCOc2c1	Traditional Herbal Isolate=nandazurine	-6.8
3689	C([N+]1(C)CCCCC1)[C@@H]1OC(c2ccccc2)(c2ccccc2)OC1	NPC Approved Name=gastrophyllin-a	-6.8
3717	O(C)c1c2OCOc2c-2c3[C@@H]([N+H2]CCc13)Cc1c-2cc2OCOc2c1	Traditional Herbal Isolate=cassythidine	-6.8
3823	Oc1c2[C@@H]3OCC45[C@@H]3[C@@](C)(Oc2cc(C)c1)CCC4C(C)(C)CCC5	NPC Approved Name=siccanin	-6.8
3843	O=C1O[C@H](c2cocc2)C[C@@]2(C)[C@@H]1CC(=O)[C@H]1[C@H]3C(=O)OC(C3)C[C@@H]21	Traditional Herbal Isolate=diosbulbin	-6.8
3856	O=C1C(=C)C2CC31C(=O)O[C@@H]1C4([C@@H]5[C@](C)(CO[C@@H]5OC4)CC1)C3CC2	Traditional Herbal Isolate=diterpenoids	-6.8
4006	Oc1cc2c(cc1)C[C@@H]1[N+@@H](CCc3ccccc3)CC[C@@]32[C@H]1CCCC3	US Illegal/Scheduled Drug (Schedule 1)=Phenomorphan	-6.8
4055	O(C)c1c(O)cc2OC(=O)C(Oc3cc4OC(=O)C=Cc4cc3)=Cc2c1	Traditional Herbal Isolate=daphnoretin	-6.8
4083	O=C(C)N1[C@@H]2[C@@H]3[C@H](O)OCC=C4[C@@H]3C[C@H]3[N+H](C4)CCC23c2c1cccc2	Traditional Herbal Isolate=diaboline	-6.8
4096	O=C(OC)C=1[C@H]2[C@H]([C@@H](C)OC=1)C[N+H]1[C@@H](c3[nH]c4c(c3CC1)cccc4)C2	Traditional Herbal Isolate=akuammigine	-6.8
4113	[C@@H]1(c2cc3OCOc3cc2)OC[C@H]2[C@@H](c3cc4OCOc4cc3)OC[C@@H]12	Traditional Herbal Isolate=sesamin;d-asarinin;l-sesamin	-6.8
4119	O[C@H]1[C@H]2[C@@H]([N+@@H](C)Cc3c4OCOc4ccc23)c2c(cc3OCOc3c2)C1	Traditional Herbal Isolate=chelidonine	-6.8
4309	O=C(CO)[C@@]1(O)[C@]2(C)[C@H]([C@@H]3[C@H]([C@H](O)C2)[C@]2(C)C(=CC(=O)CC2)CC3)CC1	China Approved Name=hydrocortisone Indian Approved Name=hydrocortisone;hydrocortisone acet WHO Essential Medicine=hydrocortisone Australia Approved Name=HYDROCORTISONE ACETATE;HYDROCORTISONE FDA Approved Drug=HYDROCORTISONE	-6.8
4312	O=C(C[N+@H]1[C@H]2[C@@H]3C(c4c(ccc(O)c4)C2)(CC1)CCCC3)c1ccccc1	US Illegal/Scheduled Drug (Schedule 1)=Levophenacylmorphan	-6.8
4319	O=C(C[N+@@H]1[C@@H]2[C@H]3C(c4c(ccc(O)c4)C2)(CC1)CCCC3)c1ccccc1	US Illegal/Scheduled Drug (Schedule 1)=Levophenacylmorphan	-6.8
4320	C(Cc1nc(CC[N+H]2CCCCC2)on1)(c1ccccc1)c1ccccc1	Indian Approved Name=prenoxdiazine hcl	-6.8
4443	O=C(Oc1c2C(=O)c3c(OC(=O)C)cccc3C(=O)c2cc(C(=O)[O-])c1)C	Indian Approved Name=diacerein	-6.8
4503	Fc1ccc(-c2c3c(nc(N4CC[N+H](CC)CC4)c2)CCCCCC3)cc1	NPC Approved Name=blonanserin	-6.8
4541	O([C@@H]1OC[C@H]2[C@@H](c3cc4OCOc4cc3)OC[C@H]12)c1cc2OCOc2cc1	Traditional Herbal Isolate=sesamolin	-6.8
4542	O[C@]12[C@H](c3cc4OCOc4cc3)OC[C@H]1[C@@H](c1cc3OCOc3cc1)OC2	Traditional Herbal Isolate=paulownin	-6.8
4553	O[C@@H]1O[C@@H]2[C@@H]([N+@@H](C)CCc3c2cc2OCOc2c3)c2c1c1OCOc1cc2	Traditional Herbal Isolate=rhoeagenine	-6.8
4560	O[C@H]1O[C@@H]2[C@@H]([N+@H](C)CCc3c2cc2OCOc2c3)c2c1c1OCOc1cc2	Traditional Herbal Isolate=rhoeagenine	-6.8
4614	O=C(O[C@@H]1[C@@H]2C(=C)C(=O)O[C@H]2[C@@H]2[C@@](C)(O2)C[C@H]2OC(=O)C(=C2)C1)/C=C(\C)/C	Traditional Herbal Isolate=elephantin	-6.8
4666	S(=O)(=O)([O-])c1c2c(C(=O)/C(=N\Nc3c4c(ccc3)cccc4)/C=C2)ccc1	Indian Approved Name=cepae ext	-6.8
4728	O(c1cc2c([C@@H]3[C@@H]([C@H]4[C@](C)([C@@](O)(C#C)[C@H](O)C4)CC3)CC2)cc1)C1CCCC1	China Approved Name=nilestriol	-6.8
4735	O=C1N2[C@H]3[C@H]4[C@@]5(O)C(=CCO[C@@H]4C1)C[N+@@H](C)CCC3(C(=O)C5)c1c2cccc1	Traditional Herbal Isolate=icajine	-6.8
4739	O=C1N2[C@@H]3[C@H]4[C@@]5(O)C(=CCO[C@H]4C1)C[N+@@H](C)CCC3(C(=O)C5)c1c2cccc1	Traditional Herbal Isolate=icajine	-6.8
4741	O=C1N2[C@@H]3[C@@H]4[C@]5(O)C(=CCO[C@@H]4C1)C[N+@H](C)CCC3(C(=O)C5)c1c2cccc1	Traditional Herbal Isolate=icajine	-6.8
4778	Clc1ccc(CC2=NN([C@@H]3CC[N+@@H](C)CCC3)C(=O)c3c2cccc3)cc1	Indian Approved Name=azelastine FDA Approved Drug=AZELASTINE HYDROCHLORIDE	-6.8
4898	Clc1c(S(=O)(=O)N)cc2S(=O)(=O)N[C@@H](Cc3ccccc3)Nc2c1	NPC Approved Name=benzylhydrochlorothiazide	-6.8
4945	O=C(OC[C@H]1[C@H](O)[C@H](O)[C@@H](O)[C@H](Oc2c(CO)cccc2)O1)c1ccccc1	Traditional Herbal Isolate=populin	-6.8
4993	Clc1ccc([C@H](N2CC[N+H](Cc3cc(C)ccc3)CC2)c2ccccc2)cc1	Indian Approved Name=meclizine hcl FDA Approved Drug=MECLIZINE HYDROCHLORIDE	-6.8
4996	O(CCc1c(C)oc(-c2ccccc2)n1)c1ccc(C[C@@H]2C(=O)ONC2=O)cc1	NPC Approved Name=reglitazar	-6.8
5000	O=C(OC1CC2[N+]3(C(C1)CC2)CCCC3)C(O)(c1ccccc1)c1ccccc1	Traditional Herbal Isolate=urgenin FDA Approved Drug=TROSPIUM CHLORIDE	-6.8
5014	Brc1sc2-n3c(C)nnc3CN=C(c3c(Cl)cccc3)c2c1	NPC Approved Name=brotizolam	-6.8
5025	O=C(N1CCN(c2cc3c(NC(=O)CC3)cc2)CC1)c1cc(OC)c(OC)cc1	NPC Approved Name=vesnarinone	-6.8
5050	O=C(O[C@H]1[C@@]2(C)[C@@H]([C@H]3[C@H]([C@@H]4C(=CC(=O)CC4)CC3)CC2)CC1)CCc1occc1	NPC Approved Name=estr-4-en-3-one 17-(3-(2-furanyl)-1-oxopropoxy)- (17beta)-	-6.8
5073	O[C@@H]1CC=2[C@](C)([C@@H]3[C@@H]([C@H]4[C@@](C)([C@H]5[C@@H](C)[C@H]6[N+H]([C@@H]5C4)C[C@@H](C)CC6)CC3)CC=2)CC1	Traditional Herbal Isolate=solanidine	-6.8
5084	O[C@H]1CC=2[C@@](C)([C@H]3[C@@H]([C@H]4[C@@](C)([C@@H]5[C@@H](C)[C@@H]6[N+H]([C@H]5C4)C[C@@H](C)CC6)CC3)CC=2)CC1	Traditional Herbal Isolate=solanidine	-6.8
5148	O=C([O-])CC[C@@H](C)[C@@H]1[C@]2(C)C(=O)C[C@@H]3[C@@]4(C)[C@H](CC(=O)[C@@H]3[C@H]2CC1)CC(=O)CC4	China Approved Name=dehydrocholic acid	-6.8
5224	Fc1cc2c(O[C@H]([C@@H](O)C[N+H2]C[C@@H](O)[C@@H]3Oc4c(cc(F)cc4)CC3)CC2)cc1	Indian Approved Name=nebivolol FDA Approved Drug=NEBIVOLOL HYDROCHLORIDE	-6.8
5276	O=C(O[C@@]1(C#C)[C@@]2(C)[C@@H]([C@@H]3[C@H]([C@@H]4C(=CC(=O)CC4)CC3)CC2)CC1)CCCCCC	WHO Essential Medicine=norethisterone enantate	-6.8
5293	C(C)(C)[C@H]1[C@@]2(C)[C@@H]([C@]3(C)[C@@](C)([C@H]4[C@](C)([C@H]5[C@](C)(C(C)=CCC5)CC4)CC3)CC2)CC1	Traditional Herbal Isolate=filicene	-6.8
5295	C(C)(C)[C@@H]1[C@@]2(C)[C@@H]([C@@]3(C)[C@](C)([C@@H]4C([C@@]5(C)[C@H](C(C)(C)CCC5)CC4)=CC3)CC2)CC1	Traditional Herbal Isolate=fernene	-6.8
5296	C(=C)(C)[C@@H]1[C@H]2[C@@](C)([C@@H]3[C@](C)([C@]4(C)[C@H]([C@]5(C)[C@H](C(C)(C)CCC5)CC4)CC3)CC2)CC1	Traditional Herbal Isolate=diploptene	-6.8
5317	O=C(O[C@H]1[C@@]2(C)[C@@H]([C@H]3[C@H]([C@@H]4C(=CC(=O)CC4)CC3)CC2)CC1)CCC1CCCCC1	NPC Approved Name=nandrolone cyclohexylpropionate	-6.8
5325	O=C(C)[C@@H]1[C@H]2[C@@](C)([C@@H]3[C@](C)([C@]4(C)[C@H]([C@]5(C)[C@@H](C(C)(C)CCC5)CC4)CC3)CC2)CC1	Traditional Herbal Isolate=adiantone	-6.8
5338	O=C(C)[C@@H]1[C@H]2[C@](C)([C@@H]3[C@](C)([C@]4(C)[C@@H]([C@]5(C)[C@H](C(C)(C)CCC5)CC4)CC3)CC2)CC1	Traditional Herbal Isolate=adiantone	-6.8
5365	O=C(OCC(=O)[C@@H]1[C@@]2(C)[C@@H]([C@@H]3[C@H]([C@]4(C)C(=CC(=O)CC4)CC3)CC2)CC1)C(C)(C)C	FDA Approved Drug=DESOXYCORTICOSTERONE PIVALATE	-6.8
5388	O(C)c1c([C@H]2[C@H](O)[C@H](O)[C@H](O)CO2)c2OC(c3ccc(O)cc3)=CC(=O)c2c([O-])c1	Traditional Herbal Isolate=molludistin	-6.8
5415	O[C@H]1C[C@H]2[C@@](C)([C@@H]3[C@@H]([C@H]4[C@@](C)([C@H]5[C@@H](C)C6(O[C@@H]5C4)OC[C@@H](C)CC6)CC3)CC2)CC1	Traditional Herbal Isolate=tigogenin;sarsasapogenin	-6.8
5417	O[C@H]1C[C@@H]2[C@](C)([C@@H]3[C@@H]([C@@H]4[C@@](C)([C@@H]5[C@@H](C)C6(O[C@@H]5C4)OC[C@@H](C)CC6)CC3)CC2)CC1	Traditional Herbal Isolate=tigogenin;sarsasapogenin	-6.8
5424	O[C@H]1C[C@@H]2[C@](C)([C@@H]3[C@H]([C@@H]4[C@@](C)([C@H]5[C@H](C)C6(O[C@@H]5C4)OC[C@H](C)CC6)CC3)CC2)CC1	Traditional Herbal Isolate=tigogenin;sarsasapogenin	-6.8
5432	O[C@@H]1[C@@]2(C)[C@@H]3[C@@H]([C@@H]4[C@](C)([C@H]5[C@H](C)[C@]6(O[C@@H]5C4)OC[C@@H](C)CC6)CC3)CC[C@@H]2CCC1	Traditional Herbal Isolate=spirostanol saponins	-6.8
5569	O=C(NCC(=O)[O-])[C@@H](C[N+@H]1C[C@H](C)[C@](C)(c2cc(O)ccc2)CC1)Cc1ccccc1	FDA Approved Drug=ALVIMOPAN	-6.8
5570	O=C([O-])C1(c2ccccc2)CC[N+H](CCC(C#N)(c2ccccc2)c2ccccc2)CC1	US Illegal/Scheduled Drug (Schedule 1)=Difenoxin FDA Approved Drug=DIFENOXIN HYDROCHLORIDE	-6.8
5609	O=CC=1[C@]2(C)[C@@H]([C@]3(C)[C@H]([C@@]4(C)[C@](C)([C@H]5[C@@](C)([C@H](C(C)C)CC5)CC4)CC3)CC2)CCC=1	Traditional Herbal Isolate=filicenal	-6.8
5625	O=C1C(C)(C)[C@@H]2[C@@](C)(C=3[C@@H]([C@]4(C)[C@@](C)([C@@H]5[C@](C)([C@H](C(C)C)CC5)CC4)CC=3)CC2)CC1	Traditional Herbal Isolate=arborinone	-6.8
5628	O=C1C(C)(C)[C@H]2[C@@](C)(C=3[C@@H]([C@]4(C)[C@@](C)([C@H]5[C@@](C)([C@@H](C(C)C)CC5)CC4)CC=3)CC2)CC1	Traditional Herbal Isolate=arborinone	-6.8
5631	O=C1C(C)(C)[C@@H]2[C@](C)(C=3[C@H]([C@]4(C)[C@@](C)([C@@H]5[C@@](C)([C@H](C(C)C)CC5)CC4)CC=3)CC2)CC1	Traditional Herbal Isolate=arborinone	-6.8
5632	O=C1C(C)(C)[C@H]2[C@](C)(C=3[C@H]([C@@]4(C)[C@@](C)([C@@H]5[C@@](C)([C@H](C(C)C)CC5)CC4)CC=3)CC2)CC1	Traditional Herbal Isolate=arborinone	-6.8
5637	O=C1C(C)(C)[C@@H]2[C@](C)([C@H]3[C@@](C)(C=4[C@@](C)([C@H]5[C@](C)(CC=4)CCC(C)(C)C5)CC3)CC2)CC1	Traditional Herbal Isolate=taraxerone	-6.8
5645	O(C)c1c(OC)cc2c(N3C(=O)C[C@H]4OCC=C5[C@@H]6[C@H]4[C@H]3[C@@]2(C(=O)C6)CC[N+@@H](C)C5)c1	Traditional Herbal Isolate=novacine	-6.8
5693	O[C@@H]1C(C)(C)[C@@H]2[C@](C)(C=3[C@@H]([C@@]4(C)[C@](C)([C@@H]5[C@](C)([C@@H](C(C)C)CC5)CC4)CC=3)CC2)CC1	Traditional Herbal Isolate=fernenol	-6.8
5704	O[C@@H]1C(C)(C)[C@H]2[C@](C)(C3=C([C@]4(C)[C@](C)([C@H]([C@H](CC/C=C(\C)/C)C)CC4)CC3)CC2)CC1	Traditional Herbal Isolate=tirucallol	-6.8
5710	Fc1cc2onc(C3CC[N+H](CCC=4C(=O)N5C([C@@H](O)CCC5)=NC=4C)CC3)c2cc1	FDA Approved Drug=PALIPERIDONE Indian Approved Name=paliperidone	-6.8
5731	O[C@@H]1CC23[C@@](C)([C@H]4C(OO2)([C@@H]2[C@@](C)([C@@H]([C@@H](/C=C/[C@@H](C(C)C)C)C)CC2)CC4)C=C3)CC1	Traditional Herbal Isolate=ergosterol peroxide	-6.8
5744	O[C@@]1(C)OCC23[C@H]4[C@](C)([C@@]5(C)[C@@H]([C@]6(C)[C@H](C(C)(C)CCC6)CC5)CC4)CC[C@@H]2[C@H]1CC3	Traditional Herbal Isolate=adipedatol	-6.8
5746	O[C@]1(C)OCC23[C@H]4[C@](C)([C@@]5(C)[C@@H]([C@]6(C)[C@H](C(C)(C)CCC6)CC5)CC4)CC[C@@H]2[C@@H]1CC3	Traditional Herbal Isolate=adipedatol	-6.8
5758	O=C1C=C2C(=C3[C@H](c4ccc(N(C)C)cc4)C[C@@]4(C)[C@](O)(C#CC)CC[C@@H]4[C@@H]3CC2)CC1	China Approved Name=mifepristone WHO Essential Medicine=mifepristone Indian Approved Name=mifepristone FDA Approved Drug=MIFEPRISTONE	-6.8
5784	O([C@H]1[C@@H](O)[C@@H](O)[C@@H](O)[C@H](CO)O1)c1cc([O-])c2C(=O)C(c3ccc(O)cc3)=COc2c1	Indian Approved Name=genistin	-6.8
5789	O([C@H]1[C@@H](O)[C@H](O)[C@@H](O)[C@@H](CO)O1)c1cc([O-])c2C(=O)C(c3ccc(O)cc3)=COc2c1	Indian Approved Name=genistin	-6.8
5794	O([C@@H]1[C@H](O)[C@H](O)[C@H](O)[C@@H](CO)O1)c1cc([O-])c2C(=O)C(c3ccc(O)cc3)=COc2c1	Indian Approved Name=genistin	-6.8
5796	O([C@H]1[C@H](O)[C@@H](O)[C@H](O)[C@@H](CO)O1)c1cc([O-])c2C(=O)C(c3ccc(O)cc3)=COc2c1	Indian Approved Name=genistin	-6.8
5800	O=C1c2c([O-])c([C@H]3[C@H](O)[C@@H](O)[C@H](O)[C@H](CO)O3)c(O)cc2OC(c2ccc(O)cc2)=C1	Traditional Herbal Isolate=isovitexin;saponaretin	-6.8
5869	Fc1c(C)c2c3c(nc4c(c3[C@@H]([N+H3])CC2)CN2C(=O)C3=C([C@@](O)(CC)C(=O)OC3)C=C42)c1	NPC Approved Name=exatecan	-6.8
5920	O=C1[C@H](C)[C@]2(C)[C@@H]([C@@]3(C)[C@H](C(=O)C2)[C@@]2(C)[C@](C)([C@H]4[C@@](C)(CC2)CCC(C)(C)C4)CC3)CC1	Traditional Herbal Isolate=putranjivadione	-6.8
5929	O=C1[C@H](C)[C@@]2(C)[C@H]([C@@]3(C)[C@@H](C(=O)C2)[C@@]2(C)[C@](C)([C@@H]4[C@](C)(CC2)CCC(C)(C)C4)CC3)CC1	Traditional Herbal Isolate=putranjivadione	-6.8
5991	O[C@@H]1[C@]2(C)[C@H](C=3[C@@](C)([C@]4(C)[C@H]([C@]5(C)[C@H](C(C)(C)[C@@H](O)CC5)CC4)CC=3)CC2)CC(C)(C)C1	Traditional Herbal Isolate=sophoradiol	-6.8
5998	O[C@@H]1C(C)(C)[C@H]2[C@@](C)([C@H]3C(=CC2)C[C@]2(C)[C@@H]([C@@]4(C)[C@H](C(C)(C)[C@@H](O)CC4)CC2)CC3)CC1	Traditional Herbal Isolate=serratenediol	-6.8
6000	O[C@@H]1[C@]2(C)[C@@H]([C@@H](C)C(C)=CC2)[C@H]2[C@](C)([C@]3(C)[C@H]([C@@]4(C)[C@H](C(C)(C)[C@@H](O)CC4)CC3)CC2)C1	Traditional Herbal Isolate=faradiol	-6.8
6045	O(C)c1c([C@H]2[C@@H](O)[C@@H](O)[C@H](O)[C@@H](CO)O2)c([O-])c2C(=O)C=C(c3ccc(O)cc3)Oc2c1	Traditional Herbal Isolate=swertisin	-6.8
6071	O(C)c1c(O[C@@H]2[C@@H](O)[C@@H](O)[C@H](O)[C@@H](CO)O2)cc2OC=C(c3ccc(O)cc3)C(=O)c2c1	Indian Approved Name=glycitein	-6.8
6086	O(C)c1ccc([C@H]2Oc3c(c([O-])cc(O[C@H]4[C@@H](O)[C@H](O)[C@@H](O)[C@H](CO)O4)c3)C(=O)C2)cc1	Traditional Herbal Isolate=puddumin a	-6.8
6088	S(=O)(=O)(O/N=C(/S[C@@H]1[C@@H](O)[C@H](O)[C@H](O)[C@H](CO)O1)\Cc1c2c([nH]c1)cccc2)[O-]	Traditional Herbal Isolate=glucobrassicin	-6.8
6118	O=C(N1CCN(c2nc(N)c3c(n2)cc(OC)c(OC)c3)CC1)[C@@H]1Oc2c(OC1)cccc2	China Approved Name=doxazosin Indian Approved Name=doxazosin FDA Approved Drug=DOXAZOSIN MESYLATE	-6.8
6151	P(=O)(OC[C@H](O)[C@@H](O)[C@@H](O)CN1c2c(N=C3C(=O)NC(=O)N=C13)cc(C)c(C)c2)([O-])[O-]	FDA Approved Drug=RIBOFLAVIN 5'-PHOSPHATE SODIUM	-6.8
6192	O=C([O-])[C@@]1(C)[C@@H](O)CC[C@]2(C)[C@@H]1CC[C@]1(C)[C@]3(C)[C@@H]([C@]4(C)[C@H]([C@@H](C(=C)C)CC4)CC3)CC[C@@H]21	Traditional Herbal Isolate=woodwardic acid	-6.8
6212	Clc1c(C2=NCc3n(c(C)nn3)[C@@H]3SC(CCC(=O)N4CCOCC4)=C[C@@H]23)cccc1	NPC Approved Name=apafant	-6.8
6213	Clc1c(C2=NCc3n(c(C)nn3)[C@H]3SC(CCC(=O)N4CCOCC4)=C[C@@H]23)cccc1	NPC Approved Name=apafant	-6.8
6218	O=C(N)C=1C(=O)[C@]2(O)C([O-])=C3C(=O)c4c([O-])cccc4[C@](O)(C)[C@H]3[C@@H](O)[C@@H]2[C@@H]([N+H](C)C)C=1[O-]	China Approved Name=oxytetracycline Indian Approved Name=oxytetracycline FDA Approved Drug=OXYTETRACYCLINE;OXYTETRACYCLINE CALCIUM;OXYTETRACYCLINE HYDROCHLORIDE	-6.8
6238	O=C(OCC(=O)[C@@]1(O)[C@@]2(C)[C@@H]([C@@H]3[C@@H]([C@@H](O)C2)[C@@]2(C)C(=CC(=O)C=C2)CC3)CC1)CC(C)(C)C	FDA Approved Drug=PREDNISOLONE TEBUTATE	-6.8
6309	O(C)c1c(O)ccc(C=2Oc3c([C@@H]4[C@H](O)[C@@H](O)[C@@H](O)[C@@H](CO)O4)c(O)cc([O-])c3C(=O)C=2)c1	Traditional Herbal Isolate=scoparin	-6.8
6318	O(C)c1c([O-])c2C(=O)C=C(c3ccc(O)cc3)Oc2cc1O[C@H]1[C@@H](O)[C@H](O)[C@H](O)[C@H](CO)O1	Traditional Herbal Isolate=homoplantaginin	-6.8
6325	O([C@H]1[C@@H](O)[C@H](O)[C@H](O)[C@H](CO)O1)c1c(O)cc(C2=C([O-])C(=O)c3c([O-])cc(O)cc3O2)cc1	Traditional Herbal Isolate=quercetin-4-glucoside	-6.8
6334	O=C1C(C)=C2[C@@]([C@@]34OC(=O)C(C)=C3C[C@H]3C(=C)CCC[C@]3(C)C4)(O1)C[C@@]1(C)[C@H](C(=C)CCC1)C2	Traditional Herbal Isolate=biatractylolide	-6.8
6344	O(C[C@@H]1[C@H](O)[C@@H](O)[C@H](O)[C@H](O)O1)C1=C(c2cc(O)c(O)cc2)Oc2c(c([O-])cc(O)c2)C1=O	Traditional Herbal Isolate=isoquercetrin;iso-quercitrin	-6.8
6351	Clc1c(-n2c(c(C)c(C(=O)NN3CCCCC3)n2)-c2ccc(Cl)cc2)ccc(Cl)c1	Indian Approved Name=rimonabant	-6.8
6419	O=C([O-])[C@H](NC(=O)c1ccc(NC[C@H]2N(C=O)C=3C(=O)N=C(N)NC=3NC2)cc1)CCC(=O)[O-]	Indian Approved Name=calcium folinate Traditional Herbal Isolate=folinic acid Australia Approved Name=FOLINIC ACID;LEUCOVORIN China Approved Name=leucovorin WHO Essential Medicine=calcium folinate FDA Approved Drug=LEUCOVORIN CALCIUM	-6.8
6420	O=C([O-])[C@H](NC(=O)c1ccc(NC[C@H]2N(C=O)C=3C(=O)N=C(N)NC=3NC2)cc1)CCC(=O)[O-]	FDA Approved Drug=LEVOLEUCOVORIN CALCIUM	-6.8
6434	O[C@@H]1C(C)(C)[C@@H]2[C@](C)([C@H]3[C@@](C)(C45[C@H]([C@@H]6[C@](O)(C)C[C@@H](/C=C(\C)/C)OC6(OC4)C5)CC3)CC2)CC1	Traditional Herbal Isolate=jujubogenin	-6.8
6436	O[C@@H]1C(C)(C)[C@@H]2[C@](C)([C@H]3[C@@](C)(C45[C@@H]([C@@H]6[C@@](O)(C)C[C@@H](/C=C(\C)/C)OC6(OC4)C5)CC3)CC2)CC1	Traditional Herbal Isolate=jujubogenin	-6.8
6439	O[C@@H]1C(C)(C)[C@@H]2[C@](C)([C@@H]3[C@@](C)(C45[C@H]([C@@H]6[C@](O)(C)C[C@H](/C=C(\C)/C)OC6(OC4)C5)CC3)CC2)CC1	Traditional Herbal Isolate=jujubogenin	-6.8
6442	O[C@@H]1C(C)(C)[C@H]2[C@](C)([C@H]3[C@@](C)(C45[C@@H]([C@H]6[C@@](O)(C)C[C@@H](/C=C(\C)/C)OC6(OC4)C5)CC3)CC2)CC1	Traditional Herbal Isolate=jujubogenin	-6.8
6444	O[C@@H]1C(C)(C)[C@H]2[C@](C)([C@@H]3[C@@](C)(C45[C@H]([C@@H]6[C@](O)(C)C[C@@H](/C=C(\C)/C)OC6(OC4)C5)CC3)CC2)CC1	Traditional Herbal Isolate=jujubogenin	-6.8
6445	O[C@@H]1C(C)(C)[C@H]2[C@](C)([C@@H]3[C@@](C)(C45[C@@H]([C@H]6[C@](O)(C)C[C@H](/C=C(\C)/C)OC6(OC4)C5)CC3)CC2)CC1	Traditional Herbal Isolate=jujubogenin	-6.8
6450	O[C@H]1[C@@H]([C@H]2[C@]3(C)[C@](C)(C=4[C@H]([C@]5(C)[C@H](C(C)(C)[C@@H](O)CC5)CC=4)CC3)CC2)C[C@@H]([C@H]2C(C)(C)O2)O1	Traditional Herbal Isolate=melianol	-6.8
6455	O[C@H]1[C@@H]([C@H]2[C@@]3(C)[C@](C)(C=4[C@H]([C@]5(C)[C@H](C(C)(C)[C@@H](O)CC5)CC=4)CC3)CC2)C[C@@H]([C@@H]2C(C)(C)O2)O1	Traditional Herbal Isolate=melianol	-6.8
6457	O[C@H]1[C@@H]([C@H]2[C@@]3(C)[C@](C)(C=4[C@@H]([C@]5(C)[C@H](C(C)(C)[C@@H](O)CC5)CC=4)CC3)CC2)C[C@@H]([C@@H]2C(C)(C)O2)O1	Traditional Herbal Isolate=melianol	-6.8
6482	O=C1N(Cc2nc(C)c3c(n2)cccc3)C(=O)c2n(CC#CC)c(N3C[C@H]([N+H3])CCC3)nc2N1C	FDA Approved Drug=LINAGLIPTIN	-6.8
6510	O=C(O[C@H]1[C@H](OC(=O)C)C[C@@H]2[C@@]1(C)CC[C@H]1[C@H]2CCc2c1ccc(OC(=O)c1ccccc1)c2)C	NPC Approved Name=holin	-6.8
6589	O(C)c1c(O)ccc([C@@H]2[C@H](CO)Oc3c(O2)cc([C@@H]2[C@H](O)C(=O)c4c([O-])cc(O)cc4O2)cc3)c1	China Approved Name=silibinin Traditional Herbal Isolate=dehydrosilybin;silybin;silymarin	-6.8
6594	O=C(O[C@H]1[C@@]2(C)[C@@H]([C@]3(C)[C@@H](C(C)(C)C(=O)C=C3)C1)CC[C@]1(C)[C@@H](c3cocc3)OC(=O)[C@H]3O[C@]213)C	Traditional Herbal Isolate=gedunin	-6.8
6619	O=C1[C@@]2(C)[C@@H](C34C(C(C)(C)OC3CC(=O)OC4)=C1O)CCC1(C)[C@@H](c3cocc3)OC(=O)C3O[C@@]213	Traditional Herbal Isolate=evodol	-6.8
6626	O=C1C(C)=C(C)C[C@H]([C@]2(C)O[C@H](O)C34O[C@@](O)([C@@H]5[C@@H]([C@@]6(C)C(=O)CC=CC6=CC5)CC3)CCC24)O1	Traditional Herbal Isolate=withaphysalin	-6.8
6635	O=C1C(C)=C(C)C[C@@H]([C@]2(C)O[C@@H](O)C34O[C@@](O)([C@@H]5[C@H]([C@@]6(C)C(=O)CC=CC6=CC5)CC3)CCC24)O1	Traditional Herbal Isolate=withaphysalin	-6.8
6710	O=C1[C@H]2C(C)(C)[C@H](O)[C@H](O)C[C@]2(C)[C@H]2C(=C1)C[C@]1(C)[C@H]([C@@]3(C)[C@H]([C@](CO)(C)[C@H](O)CC3)CC1)CC2	Traditional Herbal Isolate=lycoclavanin	-6.8
6729	O[C@@H]1[C@@](O)(Cc2ccccc2)[C@](O)(Cc2ccccc2)[C@]2(O)C(C)(C)[C@@]2(O)[C@]1(O)Cc1ccccc1	Traditional Herbal Isolate=6-methylocodine	-6.8
6730	O[C@@H](C(O)(C)C)[C@H]1O[C@@H](O)[C@@H]([C@H]2[C@@]3(C)[C@](C)(C=4[C@H]([C@]5(C)[C@@H](C(C)(C)[C@H](O)CC5)CC=4)CC3)CC2)C1	Traditional Herbal Isolate=melianotriol	-6.8
6732	O[C@@H](C(O)(C)C)[C@H]1O[C@@H](O)[C@@H]([C@H]2[C@@]3(C)[C@](C)(C=4[C@@H]([C@]5(C)[C@H](C(C)(C)[C@H](O)CC5)CC=4)CC3)CC2)C1	Traditional Herbal Isolate=melianotriol	-6.8
6737	O[C@@H](C(O)(C)C)[C@H]1O[C@H](O)[C@@H]([C@H]2[C@]3(C)[C@](C)(C=4[C@H]([C@]5(C)[C@H](C(C)(C)[C@@H](O)CC5)CC=4)CC3)CC2)C1	Traditional Herbal Isolate=melianotriol	-6.8
6781	S(=O)(=O)(O[C@@H]1[C@H](C)[C@@H]2[C@@H](O)[C@]3([C@H](C(=O)[O-])C)[C@H]([C@@]2(C)CC3)C1)c1cc2SC(=S)Nc2cc1	NPC Approved Name=santonic acid	-6.8
6789	O=C(O[C@@H]1C(C)(C)[C@@H]2[C@](C)([C@H]3[C@](C)([C@@]4(C)C([C@@H]5[C@@](C(=O)[O-])(CC4)CCC(C)(C)C5)=CC3)CC2)CC1)C	Traditional Herbal Isolate=acetyl oleanolic acid	-6.8
6791	O=C(OCC=1[C@@H]2[C@H](O[C@H]3[C@@H](O)[C@H](O)[C@H](O)[C@H](CO)O3)O[C@@H](OC)C[C@H]2[C@@H](O)C=1)c1ccc(O)cc1	Traditional Herbal Isolate=nishindaside	-6.8
6955	O(C)[C@@H]1[C@@H](O)[C@@H](C)O[C@H](O[C@H]2C[C@@H]3[C@@](C)([C@H]4[C@@H]([C@@]5(O)[C@@](C)([C@@H](C6=CC(=O)OC6)CC5)CC4)CC3)CC2)C1	Traditional Herbal Isolate=somalin	-6.8
6956	O(C)[C@H]1[C@@H](O)[C@@H](C)O[C@@H](O[C@H]2C[C@@H]3[C@@](C)([C@H]4[C@@H]([C@]5(O)[C@](C)([C@@H](C6=CC(=O)OC6)CC5)CC4)CC3)CC2)C1	Traditional Herbal Isolate=somalin	-6.8
6959	O(C)[C@@H]1[C@@H](O)[C@H](C)O[C@H](O[C@H]2C[C@H]3[C@](C)([C@H]4[C@@H]([C@@]5(O)[C@](C)([C@H](C6=CC(=O)OC6)CC5)CC4)CC3)CC2)C1	Traditional Herbal Isolate=somalin	-6.8
7024	O=C(O[C@@H]1[C@H](O)[C@H](O)[C@H](CO)O[C@H]1Oc1c(COC(=O)[C@]2(O)C(=O)CCC=C2)cccc1)c1ccccc1	Traditional Herbal Isolate=tremulacin	-6.8
7064	O=C(O[C@H]1[C@@H](O)[C@@H]2C(C(=O)OC)=CO[C@@H](O[C@@H]3[C@H](O)[C@@H](O)[C@H](O)[C@H](CO)C3)[C@H]2[C@H]1C)/C=C/c1ccccc1	Traditional Herbal Isolate=iridoid glucosides	-6.8
7066	O=C(O[C@H]1[C@@H](O)[C@@H]2C(C(=O)OC)=CO[C@@H](O[C@H]3[C@H](O)[C@@H](O)[C@@H](O)[C@@H](CO)C3)[C@H]2[C@H]1C)/C=C/c1ccccc1	Traditional Herbal Isolate=iridoid glucosides	-6.8
7075	O=C(O[C@H]1[C@@H](O)[C@@H]2C(C(=O)OC)=CO[C@@H](O[C@@H]3[C@@H](O)[C@@H](O)[C@@H](O)[C@H](CO)C3)[C@H]2[C@H]1C)/C=C/c1ccccc1	Traditional Herbal Isolate=iridoid glucosides	-6.8
7078	O(C)[C@@H]1[C@@H](O)[C@H](C)O[C@H](O[C@@H]2C[C@H]3[C@@](C)([C@H]4[C@H]([C@]5(O)[C@](C)([C@@H]([C@@H](O)C5)C5=CC(=O)OC5)CC4)CC3)CC2)C1	Traditional Herbal Isolate=deacetylo-leandrin	-6.8
7085	O(C)[C@H]1[C@@H](O)[C@@H](C)O[C@H](O[C@@H]2C[C@H]3[C@@](C)([C@H]4[C@@H]([C@]5(O)[C@](C)([C@@H]([C@@H](O)C5)C5=CC(=O)OC5)CC4)CC3)CC2)C1	Traditional Herbal Isolate=deacetylo-leandrin	-6.8
7105	O([C@@H]1O[C@@H](C)[C@H](O)[C@H](O)C1)[C@@H]1C[C@]2(O)[C@@](CO)([C@@H]3[C@@H]([C@]4(O)[C@@](C)([C@H](C5=CC(=O)OC5)CC4)CC3)CC2)CC1	Traditional Herbal Isolate=helveticosol	-6.8
7112	O([C@H]1[C@H](O)[C@H](O)[C@@H](O)[C@H](C)O1)[C@@H]1C[C@]2(O)[C@@](C)([C@@H]3[C@H]([C@]4(O)[C@@](C)([C@H](C5=CC(=O)OC5)CC4)CC3)CC2)CC1	Traditional Herbal Isolate=peripalloside	-6.8
7135	O=C(O[C@@H]1[C@@H](OC)C2(OC)O[C@@H]3c4c(c(O)c(OC)cc4)C4(C2([N+H2]CC4)C3)C1)/C=C/c1cc(O)c(OC)cc1	Traditional Herbal Isolate=stephisoferuline	-6.8
7159	O(C)[C@@H]1[C@H](O)[C@H](C)O[C@@H](O[C@@H]2C[C@@H]3[C@@](C)([C@@H]4C(=O)[C@H](O)[C@@]5(C)[C@@H](C6=CC(=O)OC6)CC[C@]5(O)[C@H]4CC3)CC2)C1	Traditional Herbal Isolate=caudoside;sarmutoside	-6.8
7174	O=C[C@]12[C@H]3[C@@H](O)C[C@@]4(C)[C@H](C5=CC(=O)OC5)CC[C@]4(O)[C@@H]3CC[C@H]1C[C@@H](O[C@H]1O[C@H](C)[C@H](O)[C@H](OC)C1)CC2	Traditional Herbal Isolate=sinoside	-6.8
7192	O(C)[C@H]1[C@H](O)[C@H](C)O[C@H](O[C@@H]2C[C@H]3[C@@](C)([C@@H]4[C@H](O)C(=O)[C@@]5(C)[C@@H](C6=CC(=O)OC6)CC[C@]5(O)[C@H]4CC3)CC2)C1	Traditional Herbal Isolate=sinostroside	-6.8
7194	O(C)[C@H]1[C@@H](O)[C@@H](C)O[C@@H](O[C@H]2C[C@H]3[C@](C)([C@@H]4[C@H](O)C(=O)[C@]5(C)[C@@H](C6=CC(=O)OC6)CC[C@@]5(O)[C@H]4CC3)CC2)C1	Traditional Herbal Isolate=sinostroside	-6.8
7198	O(C)[C@H]1[C@H](O)[C@@H](C)O[C@@H](O[C@H]2C[C@@H]3[C@@](C)([C@H]4[C@@H](O)C(=O)[C@]5(C)[C@H](C6=CC(=O)OC6)CC[C@]5(O)[C@@H]4CC3)CC2)C1	Traditional Herbal Isolate=sinostroside	-6.8
7213	O(C)c1c(OC)ccc(C[C@@H]2[C@H](Cc3cc(OC)c4O[C@H]([C@@H](CO)c4c3)c3cc(OC)c(O)cc3)C(=O)OC2)c1	Traditional Herbal Isolate=lappaol	-6.8
7225	O=C[C@]12[C@@](O)(C[C@@H](O[C@H]3[C@H](O)[C@H](O)[C@@H](O)[C@@H](C)O3)CC1)CC[C@@H]1[C@]3(O)[C@@](C)([C@H](C4=CC(=O)OC4)CC3)CC[C@@H]21	Traditional Herbal Isolate=strophalloside	-6.8
7226	O=C[C@]12[C@@](O)(C[C@@H](O[C@H]3[C@H](O)[C@@H](O)[C@@H](O)[C@H](C)O3)CC1)CC[C@@H]1[C@]3(O)[C@@](C)([C@H](C4=CC(=O)OC4)CC3)CC[C@@H]21	Traditional Herbal Isolate=strophalloside	-6.8
7228	O=C[C@]12[C@@](O)(C[C@@H](O[C@H]3[C@H](O)[C@H](O)[C@@H](O)[C@H](C)O3)CC1)CC[C@H]1[C@]3(O)[C@@](C)([C@H](C4=CC(=O)OC4)CC3)CC[C@H]21	Traditional Herbal Isolate=strophalloside	-6.8
7230	O=C[C@]12[C@@](O)(C[C@@H](O[C@H]3[C@H](O)[C@@H](O)[C@@H](O)[C@H](C)O3)CC1)CC[C@H]1[C@]3(O)[C@@](C)([C@H](C4=CC(=O)OC4)CC3)CC[C@H]21	Traditional Herbal Isolate=strophalloside	-6.8
7232	O=C[C@]12[C@@](O)(C[C@@H](O[C@H]3[C@@H](O)[C@H](O)[C@@H](O)[C@H](C)O3)CC1)CC[C@H]1[C@]3(O)[C@@](C)([C@H](C4=CC(=O)OC4)CC3)CC[C@H]21	Traditional Herbal Isolate=strophalloside	-6.8
7250	O([C@@H]1[C@@H](O)[C@H](O)[C@@H](O)[C@@H](C)O1)[C@@H]1C[C@]2(O)[C@@](CO)([C@@H]3[C@H]([C@]4(O)[C@@](C)([C@H](C5=CC(=O)OC5)CC4)CC3)CC2)CC1	Traditional Herbal Isolate=convallatoxol	-6.8
7275	C(=C\C=C\C=C(/C=C\C=C(\C=C\[C@@]12C(C)(C)CCC[C@]1(C)O2)/C)\C)(\C=C/C=C(/C=C/[C@H]1C(C)=CCCC1(C)C)\C)/C	Traditional Herbal Isolate=alpha-carotene-5 6-epoxide	-6.8
7304	O=C(OCC(COC(=O)c1cnccc1)(COC(=O)c1cnccc1)COC(=O)c1cnccc1)c1cnccc1	NPC Approved Name=niceritrol	-6.8
7330	O=C([C@@](O)(C)[C@H]1[C@@H](O)C[C@@]2(C)[C@]1(C)CC(=O)[C@@]1(C)[C@H]2CC=C2C(C)(C)[C@@H](O)C(=O)C[C@H]12)/C=C/C(OC(=O)C)(C)C	Traditional Herbal Isolate=iso-cucurbitacin b	-6.8
7336	[P@@](=O)(O[C@@H](OC(=O)CC)C(C)C)(CC(=O)N1[C@@H](C(=O)[O-])C[C@H](C2CCCCC2)C1)CCCCc1ccccc1	China Approved Name=fosinopril Indian Approved Name=fosinopril FDA Approved Drug=FOSINOPRIL;FOSINOPRIL SODIUM	-6.8
7356	O([C@H]1[C@H](O)[C@H](O)[C@H](CO)O[C@H]1Oc1cc([O-])c2C(=O)C=C(c3ccc(O)cc3)Oc2c1)[C@H]1[C@H](O)[C@](O)(CO)CO1	Traditional Herbal Isolate=apiin	-6.8
7359	O=C(N[C@@]1(C(C)C)C(=O)N2[C@H](C(C)C)C(=O)N3[C@H]([C@]2(O)O1)CCC3)[C@H]1C[N+@@H](C)[C@@H]2[C@H](c3c4c([nH]cc4C2)ccc3)C1	NPC Approved Name=dihydroergocornine	-6.8
7363	O=C[C@]12[C@@](O)(C[C@@H](O[C@H]3[C@@H](O)[C@@H](O)[C@@H](O)[C@@H](C)O3)CC1)CC[C@@H]1[C@]3(O)[C@@](C)([C@H](O)C[C@H]21)[C@H](C1=CC(=O)OC1)CC3	Traditional Herbal Isolate=alpha-antiarin	-6.8
7370	O=C[C@]12[C@@](O)(C[C@@H](O[C@H]3[C@@H](O)[C@H](O)[C@@H](O)[C@@H](C)O3)CC1)CC[C@H]1[C@]3(O)[C@@](C)([C@H](O)C[C@H]21)[C@H](C1=CC(=O)OC1)CC3	Traditional Herbal Isolate=alpha-antiarin	-6.8
7410	O=C(O[C@H]1[C@]2(O)O[C@@H]3[C@@H](O[C@@H]2O[C@H](C)C1)C[C@H]1[C@](C=O)([C@H]2[C@@H]([C@]4(O)[C@](C)([C@@H](C5=CC(=O)OC5)CC4)CC2)CC1)C3)C	Traditional Herbal Isolate=asclepiadin;asclepin	-6.8
7461	O=C(N[C@]1(C(C)C)C(=O)N2[C@@H](CC(C)C)C(=O)N3[C@@H]([C@@]2(O)O1)CCC3)[C@H]1C[N+@@H](C)[C@@H]2[C@H](c3c4c([nH]cc4C2)ccc3)C1	NPC Approved Name=dihydro-alpha-ergocryptine	-6.8
7467	O=C(N[C@]1(C(C)C)C(=O)N2[C@@H](CC(C)C)C(=O)N3[C@@H]([C@]2(O)O1)CCC3)[C@H]1C[N+@H](C)[C@@H]2[C@@H](c3c4c([nH]cc4C2)ccc3)C1	NPC Approved Name=dihydro-alpha-ergocryptine	-6.8
7470	O=C(N[C@]1(C(C)C)C(=O)N2[C@H](CC(C)C)C(=O)N3[C@H]([C@@]2(O)O1)CCC3)[C@H]1C[N+@H](C)[C@H]2[C@H](c3c4c([nH]cc4C2)ccc3)C1	NPC Approved Name=dihydro-alpha-ergocryptine	-6.8
7531	O[C@@H]1C=C(C)[C@@H](/C=C/C(=C/C=C\C(=C/C=C/C=C(\C=C/C=C(/C=C/[C@@]23C(C)(C)C[C@H](O)C[C@]2(C)O3)\C)/C)\C)/C)C(C)(C)C1	Traditional Herbal Isolate=taraxanthin	-6.8
7574	O=C(O[C@@H]1[C@]2(O)O[C@@]34[C@](C)([C@@H]2CC[C@H]3[C@@]2(O)[C@](O)([C@@H]3[C@@](O)([C@H](O)C2)[C@@](O)(C)[C@H]2[N+H](C[C@H](C)CC2)C3)C4)CC1)/C(=C/C)/C	Traditional Herbal Isolate=cevadine;veratrine alkaloids	-6.8
7581	O=C(N[C@]1(C(C)C)C(=O)N2[C@@H](C(CC)(C)C)C(=O)N3[C@@H]([C@@]2(O)O1)CCC3)[C@H]1C[N+@@H](C)[C@@H]2[C@H](c3c4c([nH]cc4C2)ccc3)C1	FDA Approved Drug=ERGOLOID MESYLATES	-6.8
7582	O=C(N[C@]1(C(C)C)C(=O)N2[C@@H](C(CC)(C)C)C(=O)N3[C@@H]([C@@]2(O)O1)CCC3)[C@@H]1C[N+@@H](C)[C@H]2[C@@H](c3c4c([nH]cc4C2)ccc3)C1	FDA Approved Drug=ERGOLOID MESYLATES	-6.8
7590	O=C(N[C@]1(C(C)C)C(=O)N2[C@H](C(CC)(C)C)C(=O)N3[C@H]([C@@]2(O)O1)CCC3)[C@H]1C[N+@H](C)[C@H]2[C@H](c3c4c([nH]cc4C2)ccc3)C1	FDA Approved Drug=ERGOLOID MESYLATES	-6.8
7602	O(C[C@@H]1[C@@H](O)[C@@H](O)[C@H](O)[C@H](OC2=C(c3ccc(O)cc3)Oc3c(c([O-])cc(O)c3)C2=O)O1)[C@H]1[C@@H](O)[C@@H](O)[C@H](O)[C@@H](C)O1	Traditional Herbal Isolate=kaempferol-3-robinobioside	-6.8
7615	O(C)c1c(OC)cc2c3c1Oc1c(OC)cc4c([C@H]([N+@H](C)CC4)Cc4cc(c(O)cc4)Oc4ccc(cc4)CC3=NCC2)c1	Traditional Herbal Isolate=hypoepistephanine	-6.8
7624	O(C)c1c(O)c2Oc3ccc(cc3)C[C@@H]3[N+@@H](C)CCc4c3c(c(O)c(OC)c4)Oc3ccc(cc3)C[C@H]3[N+@H](C)CCc(c23)c1	Traditional Herbal Isolate=d-isochondrodendrine;iso-chondrodendrine	-6.8
7625	O(C)c1c(O)c2Oc3ccc(cc3)C[C@@H]3[N+@@H](C)CCc4c3c(c(O)c(OC)c4)Oc3ccc(cc3)C[C@H]3[N+@@H](C)CCc(c23)c1	Traditional Herbal Isolate=d-isochondrodendrine;iso-chondrodendrine	-6.8
7655	O=C(O[C@@H]1C(C)(C)[C@H]2[C@@]3([C@]4([C@@H]([C@]5(C)[C@@](C)([C@@H]([C@@H](CC/C=C(\C)/C)C)CC5)CC4)CC2)C3)CC1)/C=C/c1cc(OC)c(O)cc1	NPC Approved Name=gamma oryzanol	-6.8
7679	Clc1c(OC)cc2cc1N(C)C(=O)C[C@@H](OC(=O)C)[C@]1(C)O[C@@H]1[C@H](C)C1OC(=O)NC(O)([C@H](OC)/C=C/C=C(/C)\C2)C1	Traditional Herbal Isolate=maytanacine	-6.8
7689	O(C)c1c([C@H]2[C@@H](O)[C@@H](O)[C@H](O)[C@H](CO)O2)c([O-])c2C(=O)C=C(c3ccc(O[C@H]4[C@H](O)[C@H](O)[C@H](O)[C@H](CO)O4)cc3)Oc2c1	Traditional Herbal Isolate=flavocommelitin	-6.8
7690	O(C)c1c([C@H]2[C@@H](O)[C@@H](O)[C@H](O)[C@H](CO)O2)c([O-])c2C(=O)C=C(c3ccc(O[C@H]4[C@@H](O)[C@H](O)[C@H](O)[C@@H](CO)O4)cc3)Oc2c1	Traditional Herbal Isolate=flavocommelitin	-6.8
7701	O(C)c1c([C@H]2[C@H](O)[C@@H](O)[C@H](O)[C@@H](CO)O2)c([O-])c2C(=O)C=C(c3ccc(O[C@H]4[C@@H](O)[C@H](O)[C@H](O)[C@H](CO)O4)cc3)Oc2c1	Traditional Herbal Isolate=flavocommelitin	-6.8
7714	O(C)c1c2Oc3c4OCOc4cc4c3[C@H]([N+@H](C)CC4)Cc3ccc(Oc4c(OC)ccc(c4)C[C@H]4[N+@@H](C)CCc(c4c2)c1)cc3	Traditional Herbal Isolate=cepharanthine	-6.8
7740	O(C)c1c(O)c2Oc3ccc(cc3)C[C@H]3[N+@@H](C)CCc4c3cc(c(OC)c4)Oc3c(OC)ccc(c3)C[C@@H]3[N+@@H](C)CCc(c23)c1	Traditional Herbal Isolate=hayatinine	-6.8
7756	O(C)c1c(OC)cc2c3[C@@H]([N+@@H](C)CC2)Cc2cc(c(O)cc2)Oc2ccc(cc2)C[C@@H]2[N+@@H](C)CCc4c2cc(c(OC)c4)Oc13	Traditional Herbal Isolate=berbamine	-6.8
7760	O(C)c1c(O)c2Oc3ccc(cc3)C[C@H]3[N+@@H](C)CCc4c3cc(c(OC)c4)Oc3c(OC)ccc(c3)C[C@@H]3[N+@@H](C)CCc(c23)c1	Traditional Herbal Isolate=hayatidine	-6.8
7788	O=[N+]([O-])c1cc([C@H]2C(C(OC(C[N+@H](CCC(c3ccccc3)c3ccccc3)C)(C)C)=O)=C(C)NC(C)=C2C(=O)OC)ccc1	Indian Approved Name=lercanidipine	-6.8
7819	O=C(N[C@@H]1[C@@H](O)Cc2c1cccc2)[C@H](C[C@@H](O)C[N+@H]1[C@H](C(=O)NC(C)(C)C)CN(Cc2cnccc2)CC1)Cc1ccccc1	China Approved Name=indinavir Indian Approved Name=indinavir WHO Essential Medicine=indinavir Australia Approved Name=INDINAVIR SULFATE FDA Approved Drug=INDINAVIR SULFATE	-6.8
7824	O([C@H](C)[C@@]1(O)[C@]2(C)[C@@H](OC(=O)/C=C/c3ccccc3)C[C@H]3[C@@](O)([C@@]2(O)CC1)CC=C1[C@]3(C)CC[C@@H](O)C1)C(=O)c1cnccc1	Traditional Herbal Isolate=gagaminin	-6.8
7885	O(C)c1c(OC)cc2c([C@H](Cc3cc(Oc4ccc(C[C@H]5[N+@@H](C)CCc6c5cc(OC)c(OC)c6)cc4)c(O)cc3)[N+@@H](C)CC2)c1	Traditional Herbal Isolate=dauricine	-6.8
7895	O([C@H]1[C@H](O)[C@H](O[C@H]2[C@H]3[C@H](O)[C@H](O)O[C@H]2CO3)O[C@@H](CO)[C@@H]1O)[C@H]1[C@H](O)[C@@H]2[C@@H](O[C@H]3[C@@H](O)[C@H](O)[C@@H](O)[C@H](CO)O3)[C@@H](O1)CO2	Traditional Herbal Isolate=agarose	-6.8
7896	O=[N+]([O-])c1cc([C@H]2C(C(=O)OCCN(Cc3ccccc3)c3ccccc3)=C(C)NC(C)=C2P2(=O)OCC(C)(C)CO2)ccc1	NPC Approved Name=efonidipine	-6.8
7916	O=C(O[C@H]1[C@@H](O)[C@H]2[C@@H](O)[C@H](O1)COC(=O)c1c(c(O)c(O)c(O)c1)-c1c(O)c(O)c(O)cc1C(=O)O2)c1cc(O)c(O)c(O)c1	Traditional Herbal Isolate=corilagin	-6.8
7921	O=C(O[C@H]1[C@@H](OC)[C@@H](C(=O)OC)[C@H]2[C@@H](C1)C[N+H]1[C@H](c3[nH]c4c(c3CC1)ccc(OC)c4)C2)/C=C/c1cc(OC)c(OC)c(OC)c1	FDA Approved Drug=RESCINNAMINE	-6.8
7999	O(C)c1c(-c2c(OC)cc(O)c3c2C[C@H]2[N+@@H](C)CCC43[C@@H]2C=C(OC)C(=O)C4)c2c(c(O)c1)C13[C@@H]([C@@H]([N+@H](C)CC1)C2)C=C(OC)C(=O)C3	Traditional Herbal Isolate=disinomenine	-6.8
8001	O(C)c1c(-c2c(OC)cc(O)c3c2C[C@H]2[N+@H](C)CCC43[C@H]2C=C(OC)C(=O)C4)c2c(c(O)c1)C13[C@@H]([C@@H]([N+@H](C)CC1)C2)C=C(OC)C(=O)C3	Traditional Herbal Isolate=disinomenine	-6.8
8003	O(C)c1c(-c2c(OC)cc(O)c3c2C[C@H]2[N+@H](C)CCC43[C@@H]2C=C(OC)C(=O)C4)c2c(c(O)c1)C13[C@H]([C@@H]([N+@@H](C)CC1)C2)C=C(OC)C(=O)C3	Traditional Herbal Isolate=disinomenine	-6.8
8027	O=C([O-])[C@]12[C@H](C=3[C@](C)([C@]4(C)[C@@H]([C@@]5(C)[C@@H]([C@@](CO)(C)[C@@H](O[C@H]6[C@@H](O)[C@H](O)[C@H](O)[C@H](CO)O6)[C@H](O)C5)CC4)CC=3)CC1)CC(C)(C)[C@H](O)C2	Traditional Herbal Isolate=lucyoside a	-6.8
8084	S(=O)(=O)(N([C@H](CO)CCC[C@H](NC(=O)[C@@H]([N+H3])C(c1ccc(F)cc1)c1ccc(F)cc1)C1CC1)CCC(C)C)c1ccc([C@@H](O)C)cc1	NPC Approved Name=hydrochloride medetomidin	-6.8
8103	Clc1c(OC)cc2cc1N(C)C(=O)C[C@H](OC(=O)[C@@H](N(C(=O)C)C)C)[C@]1(C)O[C@H]1[C@H](C)[C@@H]1OC(=O)N[C@@](O)([C@@H](OC)/C=C/C=C(/C)\C2)C1	Traditional Herbal Isolate=maytansine	-6.8
8140	Fc1c([C@]2(Cn3ncnc3)OC[C@@H](COc3ccc(N4CCN(c5ccc(N6C(=O)N([C@H]([C@H](O)C)CC)N=C6)cc5)CC4)cc3)C2)ccc(F)c1	Australia Approved Name=POSACONAZOLE FDA Approved Drug=POSACONAZOLE	-6.8
8147	O=C[C@]12[C@@](O)(C[C@@H](O[C@@H]3O[C@@H](C)[C@H](O[C@H]4[C@@H](O)[C@H](O)[C@H](O)[C@H](CO)O4)[C@H](OC)C3)CC1)CC[C@H]1[C@]3(O)[C@@](C)([C@H](C4=CC(=O)OC4)CC3)CC[C@H]21	Traditional Herbal Isolate=k-strophanthin-beta	-6.8
8153	O=C(OC)CCC1=C(C)C2=NC1=Cc1c(CCC(=O)[O-])c(C)c([nH]1)C=C1C(C=C)=C(C)C(=N1)C=C1NC([C@@]3(C)[C@H](C(=O)OC)C(C(=O)OC)=CC=C13)=C2	FDA Approved Drug=VERTEPORFIN	-6.8
8158	FC(F)(F)C(=O)N[C@@H]1[C@H](O)[C@@H](C)O[C@@H](O[C@@H]2c3c([O-])c4C(=O)c5c(OC)cccc5C(=O)c4c([O-])c3C[C@@](O)(C(=O)COC(=O)CCCC)C2)C1	FDA Approved Drug=VALRUBICIN	-6.8
8162	FC(F)(F)C(=O)N[C@@H]1[C@@H](O)[C@@H](C)O[C@@H](O[C@@H]2c3c([O-])c4C(=O)c5c(OC)cccc5C(=O)c4c([O-])c3C[C@@](O)(C(=O)COC(=O)CCCC)C2)C1	FDA Approved Drug=VALRUBICIN	-6.8
8194	O=C[C@@]12[C@](O)(C[C@H](O[C@H]3[C@@H](O)[C@H](O)[C@@H](O[C@H]4[C@H](O)[C@H](O)[C@@H](O)[C@H](CO)O4)[C@H](C)O3)CC1)CC[C@@H]1[C@@]3(O)[C@](C)([C@H](C4=COC(=O)C=C4)CC3)CC[C@H]21	Traditional Herbal Isolate=hellebrin	-6.8
8223	Clc1c(OC)cc2cc1N(C)C(=O)C[C@@H](OC(=O)[C@@H](N(C(=O)CC(C)C)C)C)[C@@]1(C)O[C@@H]1[C@H](C)C1OC(=O)NC(O)([C@@H](OC)/C=C/C=C(/C)\C2)C1	Traditional Herbal Isolate=maytanvaline	-6.8
8230	Clc1c(OC)cc2cc1N(C)C(=O)C[C@H](OC(=O)[C@H](N(C(=O)CC(C)C)C)C)[C@@]1(C)O[C@@H]1[C@@H](C)C1OC(=O)NC(O)([C@H](OC)/C=C/C=C(/C)\C2)C1	Traditional Herbal Isolate=maytanvaline	-6.8
8250	O(C[C@H]1[C@H](O)[C@H](O)[C@@H](O)[C@H](OC2=C(c3cc(OCCO)c(OCCO)cc3)Oc3c(c([O-])cc(OCCO)c3)C2=O)O1)[C@H]1[C@H](O)[C@H](O)[C@H](O)[C@@H](C)O1	China Approved Name=troxerutin Indian Approved Name=troxerutin	-6.8
8277	O([C@H]1[C@H](C)[C@@H](O[C@@H]2O[C@H](C)[C@@H](O)[C@@](OC)(C)C2)[C@H](C)C(=O)O[C@@H](CC)[C@@](O)(C)[C@@H](O)[C@H](C)[N+@H](C)C[C@@H](C)C[C@]1(O)C)[C@H]1[C@@H](O)[C@H]([N+H](C)C)C[C@H](C)O1	China Approved Name=azithromycin WHO Essential Medicine=azithromycin Indian Approved Name=azithromycin FDA Approved Drug=AZITHROMYCIN	-6.8
8288	P(=O)(OP(=O)(OP(=O)(OC[C@H]1[C@@H](O)C[C@@H](N2C(=O)N=C(N)C=C2)O1)[O-])[O-])(OP(=O)(OC[C@H]1[C@H](O)[C@@H](O)[C@H](N2C(=O)NC(=O)C=C2)O1)[O-])[O-]	NPC Approved Name=denufosol [inn]	-6.8
8290	P(=O)(OP(=O)(OP(=O)(OC[C@H]1[C@@H](O)C[C@@H](N2C(=O)N=C(N)C=C2)O1)[O-])[O-])(OP(=O)(OC[C@H]1[C@H](O)[C@@H](O)[C@H](N2C(=O)NC(=O)C=C2)O1)[O-])[O-]	NPC Approved Name=denufosol [inn]	-6.8
8297	P(=O)(OP(=O)(OP(=O)(OC[C@H]1[C@@H](O)C[C@@H](N2C(=O)N=C(N)C=C2)O1)[O-])[O-])(OP(=O)(OC[C@H]1[C@H](O)[C@@H](O)[C@H](N2C(=O)NC(=O)C=C2)O1)[O-])[O-]	NPC Approved Name=denufosol [inn]	-6.8
8316	O=C(N[C@H]1[C@@H](O[C@@H]2[C@@H](O)[C@H](O)[C@H](O)[C@@H](C(=O)[O-])O2)[C@H](O)[C@H](CO)O[C@H]1O[C@@H]1[C@@H](O)[C@H](O)[C@H](O[C@H]2[C@H](O)[C@H](CO)O[C@@H](O)[C@@H]2NC(=O)C)O[C@H]1C(=O)[O-])C	Indian Approved Name=hyaluronic acid	-6.8
8343	O([C@H]1[C@@H](O)[C@H](O)[C@H](O)[C@H](CO)O1)[C@H]1[C@H]([C@@H](CC/C=C(\C)/C)C)[C@]2(C)[C@](C)([C@@H]3[C@]4([C@@]5(C(C(C)(C)[C@@H](O[C@H]6[C@@H](O)[C@@H](O)[C@H](O)[C@@H](CO)O6)CC5)C(=O)C3)C4)CC2)C1	Traditional Herbal Isolate=diadzin-4 7-diglucoside	-6.8
8373	P(=O)(O[C@H](C(=O)[O-])CCC(=O)[O-])(OC[C@H]1[C@@H](O)[C@H](O)[C@@H](OC[C@H](O)[C@@H](O)[C@@H](O)Cc2ccc(N[C@H](C)[C@H]3N(C=O)[C@@H]4C(=O)[N+H]=C(N)NC4=[N+H][C@@H]3C)cc2)O1)[O-]	Indian Approved Name=alpha lipioic acid	-6.8
8418	Cl[C@@H]1[C@@H](OC)C[C@H](/C=C(/C)\[C@H]2[C@H](C)[C@H](O)CC(=O)[C@H](CC)/C=C(\C)/C[C@H](C)C[C@H](OC)[C@@H]3[C@H](OC)C[C@@H](C)[C@](O)(C(=O)C(=O)N4[C@@H](C(=O)O2)CCCC4)O3)CC1	FDA Approved Drug=PIMECROLIMUS	-6.8
8445	O(C[C@H]1[C@H](O[C@@H]2[C@@H](O)[C@H](O)[C@H](O)[C@H](CO)O2)[C@H](O)[C@@H](O)[C@@H](O[C@@H]2[C@H](O)[C@H](O)[C@H](O)O[C@H]2CO)O1)[C@H]1[C@@H](O)[C@@H](O)[C@@H](O[C@@H]2[C@H](O)[C@@H](O)[C@@H](O)[C@H](CO)O2)[C@H](CO)O1	Traditional Herbal Isolate=amylopectin	-6.8
8452	O(C)[C@H]1[C@H](O)[C@H](O[C@@H]2[C@H](C)O[C@@H](O[C@H]3[C@@H](C)O[C@H](O[C@@H]4C[C@@H]5[C@@](C)([C@H]6[C@](O)([C@@]7(O)[C@](C)([C@H](O)C6)[C@@](O)([C@@H](O)C)CC7)CC5)CC4)C[C@H]3OC)C[C@@H]2OC)O[C@@H](C)[C@H]1O	Traditional Herbal Isolate=tenacissoside a	-6.8
8492	O=C(O[C@@H]1[C@@H](O)[C@H](O)[C@@H](O)[C@@H](CO)O1)[C@@]1(C)[C@@H](O)[C@@H](O)C[C@@]2(C)[C@@H]3[C@](C)([C@]4(CO)C([C@H]5[C@@](C(=O)O[C@H]6[C@@H](O)[C@@H](O)[C@H](O)[C@H](CO)O6)(CC4)CCC(C)(C)C5)=CC3)CC[C@@H]12	Traditional Herbal Isolate=prosapogenin	-6.8
8505	O=CC[C@H]1[C@H](O[C@@H]2[C@@H](O)[C@@H]([N+H](C)C)[C@H](O[C@@H]3O[C@H](C)[C@H](O)[C@](O)(C)C3)[C@@H](C)O2)[C@@H](OC)[C@H](O)CC(=O)O[C@H](C)C/C=C/C=C/[C@@H](O[C@H]2O[C@@H](C)[C@@H]([N+H](C)C)CC2)[C@H](C)C1	Indian Approved Name=spiramycin	-6.8
8531	O([C@H]1[C@H](O[C@@H]2[C@@H](O)[C@H](O)[C@@H](O)[C@@H](C)O2)[C@@H](O[C@@H]2CC=3[C@](C)([C@@H]4[C@H]([C@@H]5[C@](C)([C@H]6[C@H](C)[C@@H]7[N+H]([C@H]6C5)C[C@@H](C)CC7)CC4)CC=3)CC2)O[C@H](CO)[C@@H]1O)[C@@H]1[C@@H](O)[C@H](O)[C@H](O)[C@@H](CO)O1	Traditional Herbal Isolate=solanine	-6.8
8533	O([C@H]1[C@H](O[C@@H]2[C@H](O)[C@H](O)[C@@H](O)[C@@H](C)O2)[C@H](O[C@H]2CC=3[C@](C)([C@@H]4[C@H]([C@@H]5[C@](C)([C@@H]6[C@H](C)[C@H]7[N+H]([C@H]6C5)C[C@H](C)CC7)CC4)CC=3)CC2)O[C@@H](CO)[C@@H]1O)[C@@H]1[C@H](O)[C@H](O)[C@@H](O)[C@@H](CO)O1	Traditional Herbal Isolate=solanine	-6.8
8556	O=C([O-])[C@@]12[C@H](C=3[C@@](C)([C@]4(C)[C@H]([C@@]5(C)[C@H](C(C)(C)[C@@H](O[C@H]6[C@@H](O[C@H]7[C@H](O[C@H]8[C@@H](O)[C@H](O)[C@@H](O)[C@H](C)O8)[C@H](O)[C@@H](O)[C@H](CO)O7)[C@H](O)[C@H](O)CO6)CC5)CC4)CC=3)CC1)CC(C)(C)CC2	Traditional Herbal Isolate=raddeanin a	-6.8
8596	O=C([O-])[C@@H]1[C@H](O[C@H]2[C@@H](O)[C@@H](O)[C@@H](CO)O2)[C@@H](O)[C@H](O)[C@@H](O[C@@H]2C(C)(C)[C@@H]3[C@@](C)([C@@H]4[C@](C)([C@@]5(C)C([C@H]6[C@@](C(=O)O[C@H]7[C@@H](O)[C@H](O)[C@H](O)[C@H](CO)O7)(CC5)CCC(C)(C)C6)=CC4)CC3)CC2)O1	Traditional Herbal Isolate=araloside a	-6.8
8608	O=C([O-])[C@H]1[C@@H](O)C[C@@H](O[C@H]2[C@@H](O)[C@@H]([N+H3])[C@@H](O)[C@H](C)O2)/C=C/C=C/C=C/C=C/CC/C=C/C=C/[C@H](C)[C@H](O)[C@H](C)[C@H](C)OC(=O)C[C@@H](O)C[C@H](O)C[C@H](O)CC[C@H](O)[C@@H](O)CC(=O)C[C@@H]1O	China Approved Name=nystatin;Nystatin WHO Essential Medicine=nystatin Australia Approved Name=NYSTATIN FDA Approved Drug=NYSTATIN	-6.8
8637	S(C(=O)/C=C/c1cc(OC)c(O)cc1)CCNC(=O)CCNC(=O)[C@@H](O)C(COP(=O)(OP(=O)(OC[C@H]1[C@H](OP(=O)([O-])[O-])[C@@H](O)[C@@H](n2c3ncnc(N)c3nc2)O1)[O-])[O-])(C)C	Traditional Herbal Isolate=feruloyl-p-coumaroylmethane	-6.8
8643	O=C([O-])[C@@H]1[C@H](O)[C@@H](O)[C@H](O[C@H]2[C@@H](O)[C@H](O)[C@H](O)[C@H](CO)O2)[C@H](O[C@@H]2C(C)(C)[C@H]3[C@@](C)([C@@H]4[C@](C)([C@@]5(C)C([C@H]6[C@@](C(=O)O[C@H]7[C@@H](O)[C@H](O)[C@H](O)[C@H](CO)O7)(CC5)CCC(C)(C)C6)=CC4)CC3)CC2)O1	Traditional Herbal Isolate=ginsenoside ro	-6.8
8647	O=C([O-])[C@@H]1[C@H](O)[C@@H](O)[C@H](O[C@H]2[C@@H](O)[C@H](O)[C@H](O)[C@H](CO)O2)[C@H](O[C@@H]2C(C)(C)[C@H]3[C@@](C)([C@H]4[C@](C)([C@@]5(C)C([C@H]6[C@@](C(=O)O[C@H]7[C@@H](O)[C@H](O)[C@H](O)[C@H](CO)O7)(CC5)CCC(C)(C)C6)=CC4)CC3)CC2)O1	Traditional Herbal Isolate=ginsenoside ro	-6.8
8662	O=C(O[C@H]1[C@H](O)[C@@H](O)[C@H](O)[C@@H](CO[C@H]2[C@@H](O)[C@@H](O)[C@H](O[C@H]3[C@H](O)[C@@H](O)[C@H](O)[C@H](C)O3)[C@@H](CO)O2)O1)[C@]12[C@@H]([C@@H](C)[C@@H](C)CC1)C=1[C@@](C)([C@@]3(C)[C@H]([C@@]4(C)[C@@H]([C@@H](O)C3)[C@](CO)(C)[C@H](O)[C@@H](O)C4)CC=1)CC2	Traditional Herbal Isolate=madecassoside	-6.8
8665	O=C(O[C@@H]1[C@@H](O)[C@@H](O)[C@H](O)[C@@H](CO[C@H]2[C@H](O)[C@H](O)[C@@H](O[C@H]3[C@@H](O)[C@H](O)[C@@H](O)[C@@H](C)O3)[C@@H](CO)O2)O1)[C@]12[C@H]([C@@H](C)[C@@H](C)CC1)C=1[C@](C)([C@@]3(C)[C@H]([C@]4(C)[C@H]([C@H](O)C3)[C@@](CO)(C)[C@H](O)[C@@H](O)C4)CC=1)CC2	Traditional Herbal Isolate=madecassoside	-6.8
8687	S(=O)(=O)(Oc1ccc(C[C@H]([N+H3])C(=O)N[C@@H]([C@@H](O)C)C(=O)NCC(=O)N[C@H](C(=O)N[C@H](C(=O)N[C@@H](C(=O)N[C@@H](C(=O)N)Cc2ccccc2)CC(=O)[O-])CCCC)Cc2c3c([nH]c2)cccc3)cc1)[O-]	NPC Approved Name=ceruletide	-6.8
8727	S(C[C@H]1C(=O)C[C@@H]2C(=O)N[C@H](c3ccccc3)C(=O)O[C@H](C)[C@@H](NC(=O)c3c(O)cccn3)C(=O)N[C@@H](CC)C(=O)N3[C@@H](C(=O)N(C)[C@@H](Cc4ccc(N(C)C)cc4)C(=O)N2C1)CCC3)[C@H]1C2CC[N+H](C1)CC2	FDA Approved Drug=QUINUPRISTIN	-6.8
8781	O=C1Oc2c(O)c(O)c3-c4c(O)c(O)c(O)cc4C(=O)OC[C@@H]4O[C@@H](O)[C@H]5OC(=O)c6c(c(O)c(O)c(O)c6)-c6c(O)c(O)c(O)cc6C(=O)O[C@H]5[C@@H]4OC(=O)c4c(c(O)c(O)c(O)c4)-c4c(O)c(O)c5OC(=O)c3c2-c5c14	Traditional Herbal Isolate=punicalagin	-6.8
8802	O=C(N[C@H]1C(=O)N[C@@H](Cc2ccc(O)cc2)C(=O)N[C@H](Cc2c3c([nH]c2)cccc3)C(=O)N[C@@H](CCCC[N+H3])C(=O)N[C@@H](C(C)C)C(=O)N[C@H](C(=O)N[C@H]([C@H](O)C)C(=O)N)CSSC1)[C@H]([N+H3])Cc1cc2c(cc1)cccc2	FDA Approved Drug=LANREOTIDE ACETATE	-6.8
8807	O=C([O-])[C@@H]1[C@@H](O)CC2(O)OC1C[C@H](O[C@H]1[C@@H](O)[C@@H]([N+H3])[C@@H](O)[C@H](C)O1)C=CC=CC=CC=CC=CC=CC=C[C@H](C)[C@H]([C@H](C[C@@H]([C@@H](O)CC(=O)c1ccc(N)cc1)C)C)OC(=O)CC(=O)CCCC(=O)C[C@@H](O)C[C@H](O)C[C@@H](O)C2	FDA Approved Drug=CANDICIDIN	-6.8
8816	O=C([O-])[C@H]1[C@@H](O)CC2(O)OC1C[C@H](O[C@H]1[C@@H](O)[C@@H]([N+H3])[C@@H](O)[C@H](C)O1)C=CC=CC=CC=CC=CC=CC=C[C@H](C)[C@@H]([C@H](C[C@@H]([C@H](O)CC(=O)c1ccc(N)cc1)C)C)OC(=O)CC(=O)CCCC(=O)C[C@H](O)C[C@@H](O)C[C@@H](O)C2	FDA Approved Drug=CANDICIDIN	-6.8
8844	S(=O)(=O)(Oc1ccc(C[C@@H](NC(=O)[C@@H]([N+H3])CC(=O)[O-])C(=O)N[C@@H](C(=O)NCC(=O)N[C@H](C(=O)N[C@H](C(=O)N[C@@H](C(=O)N[C@@H](C(=O)N)Cc2ccccc2)CC(=O)[O-])CCSC)Cc2c3c([nH]c2)cccc3)CCSC)cc1)[O-]	NPC Approved Name=sincalide	-6.8
8848	S(=O)(=O)(Oc1ccc(C[C@@H](NC(=O)[C@H]([N+H3])CC(=O)[O-])C(=O)N[C@H](C(=O)NCC(=O)N[C@H](C(=O)N[C@H](C(=O)N[C@@H](C(=O)N[C@H](C(=O)N)Cc2ccccc2)CC(=O)[O-])CCSC)Cc2c3c([nH]c2)cccc3)CCSC)cc1)[O-]	NPC Approved Name=sincalide	-6.8
8852	S(=O)(=O)(Oc1ccc(C[C@@H](NC(=O)[C@H]([N+H3])CC(=O)[O-])C(=O)N[C@H](C(=O)NCC(=O)N[C@H](C(=O)N[C@@H](C(=O)N[C@@H](C(=O)N[C@@H](C(=O)N)Cc2ccccc2)CC(=O)[O-])CCSC)Cc2c3c([nH]c2)cccc3)CCSC)cc1)[O-]	NPC Approved Name=sincalide	-6.8
8899	O(C[C@H](CC[C@@]1(O)[C@@H](C)[C@H]2[C@@]3(C)[C@@H]([C@H]4[C@@H]([C@]5(C)C(=CC4)C[C@@H](O[C@@H]4[C@@H](O[C@H]6[C@@H](O)[C@@H](O)[C@@H](O)[C@@H](C)O6)[C@@H](O)[C@@H](O[C@@H]6[C@@H](O)[C@H](O)[C@H](O[C@H]7[C@H](O)[C@H](O)[C@H](O)[C@@H](C)O7)[C@@H](C)O6)[C@H](CO)O4)CC5)CC3)C[C@H]2O1)C)[C@H]1[C@@H](O)[C@H](O)[C@H](O)[C@H](CO)O1	Traditional Herbal Isolate=asperoside;proto-isoerubosides	-6.8
8929	O=C(N[C@@H]1[C@H](C)OC(=O)[C@H](C(C)C)N(C)C(=O)CN(C)C(=O)[C@@H]2N(C(=O)[C@H](C(C)C)NC1=O)CCC2)c1c2N=C3C(C(=O)N[C@@H]4[C@H](C)OC(=O)[C@H](C(C)C)N(C)C(=O)CN(C)C(=O)[C@@H]5N(C(=O)[C@H](C(C)C)NC4=O)CCC5)=C(N)C(=O)C(C)=C3Oc2c(C)cc1	China Approved Name=actinomycin WHO Essential Medicine=dactinomycin Indian Approved Name=dactinomycin FDA Approved Drug=DACTINOMYCIN	-6.8
8948	S(=O)(=O)(Oc1c(O)ccc([C@@H](O)[C@@H](O)[C@@H]2C(=O)N[C@H]([C@H](O)CC(=O)N)C(=O)N3[C@@H]([C@@H](O)[C@H](C)C3)C(=O)N[C@H](O)[C@H](O)C[C@@H](NC(=O)c3ccc(-c4noc(-c5ccc(OCCCCC)cc5)c4)cc3)C(=O)N[C@H]([C@H](O)C)C(=O)N3[C@H](C(=O)N2)C[C@@H](O)C3)c1)[O-]	FDA Approved Drug=MICAFUNGIN SODIUM	-6.8
8990	O=C(N[C@@H](C(=O)N[C@H](C(=O)N[C@H](C(=O)N[C@H](C(=O)N1[C@H](C(=O)NCC(=O)N)CCC1)CCCNC(=[N+H2])N)CC(C)C)Cc1cc2c(cc1)cccc2)Cc1ccc(O)cc1)[C@@H](NC(=O)[C@@H](NC(=O)[C@@H](NC(=O)[C@H]1NC(=O)CC1)Cc1nc[nH]c1)Cc1c2c([nH]c1)cccc2)CO	Indian Approved Name=nafarelin FDA Approved Drug=NAFARELIN ACETATE	-6.8
8991	O=C(N[C@@H](C(=O)N[C@@H](C(=O)N[C@H](C(=O)N[C@H](C(=O)N1[C@@H](C(=O)NCC(=O)N)CCC1)CCCNC(=[N+H2])N)CC(C)C)Cc1cc2c(cc1)cccc2)Cc1ccc(O)cc1)[C@@H](NC(=O)[C@@H](NC(=O)[C@@H](NC(=O)[C@H]1NC(=O)CC1)Cc1nc[nH]c1)Cc1c2c([nH]c1)cccc2)CO	Indian Approved Name=nafarelin FDA Approved Drug=NAFARELIN ACETATE	-6.8
9001	O=C(N[C@H](C(=O)N[C@@H](C(=O)N[C@@H](C(=O)N[C@@H](C(=O)N1[C@@H](C(=O)NCC(=O)N)CCC1)CCCNC(=[N+H2])N)CC(C)C)Cc1cc2c(cc1)cccc2)Cc1ccc(O)cc1)[C@@H](NC(=O)[C@H](NC(=O)[C@H](NC(=O)[C@H]1NC(=O)CC1)Cc1nc[nH]c1)Cc1c2c([nH]c1)cccc2)CO	Indian Approved Name=nafarelin FDA Approved Drug=NAFARELIN ACETATE	-6.8
9003	O=C(N[C@@H](C(=O)N[C@@H](C(=O)N[C@H](C(=O)N[C@H](C(=O)N1[C@H](C(=O)NCC(=O)N)CCC1)CCCNC(=[N+H2])N)CC(C)C)Cc1cc2c(cc1)cccc2)Cc1ccc(O)cc1)[C@H](NC(=O)[C@H](NC(=O)[C@H](NC(=O)[C@H]1NC(=O)CC1)Cc1nc[nH]c1)Cc1c2c([nH]c1)cccc2)CO	Indian Approved Name=nafarelin FDA Approved Drug=NAFARELIN ACETATE	-6.8
2161	O=[N+]([O-])c1c([O-])c(O)cc(C(=O)c2ccc(C)cc2)c1	FDA Approved Drug=TOLCAPONE	-6.7
2916	O=C1[C@@H](O)[C@H](c2c(O)cc(O)cc2)Oc2c1c([O-])cc(O)c2	Traditional Herbal Isolate=dihydromorin	-6.7
2974	O=C1N[C@H]2[C@H](O)[C@H](O)[C@@H](O)C=C2c2c1c([O-])c1OCOc1c2	Traditional Herbal Isolate=lycoricidinol	-6.7
3029	O=C([O-])C=1NC=2C(=O)C=C3Oc4c(N=C3C=2C(=O)C=1)cccc4	China Approved Name=pirenoxine;pirenoxine sodium Indian Approved Name=catalin	-6.7
3076	Clc1cc2C(c3ccccc3)=NCc3n(c(C)nn3)-c2cc1	China Approved Name=alprazolam Indian Approved Name=alprazolam US Illegal/Scheduled Drug (Schedule 4)=Alprazolam Australia Approved Name=ALPRAZOLAM FDA Approved Drug=ALPRAZOLAM	-6.7
3099	[C@@H](n1cncc1)(c1ccc(-c2ccccc2)cc1)c1ccccc1	China Approved Name=bifonazole Indian Approved Name=bifonazole	-6.7
3128	O=C1C=C2C(=C3[C@H]([C@@H]4[C@](C)([C@@](O)(CC#N)CC4)CC3)CC2)CC1	FDA Approved Drug=DIENOGEST	-6.7
3475	S(=O)(=O)([O-])c1ccc(N/N=C/2\C(=O)C=Cc3c\2cccc3)cc1	Traditional Herbal Isolate=laxanthone ii	-6.7
3491	O(C)c1c2c(OC(=O)C=3C(=O)OCCC2=3)c2[C@@H]3[C@@H](Oc2c1)OC=C3	Traditional Herbal Isolate=aflatoxins	-6.7
3611	O=C1C(CC=2C(=O)Oc3c(C=2[O-])cccc3)=C([O-])c2c(O1)cccc2	Traditional Herbal Isolate=dicoumarol;dicumarol FDA Approved Drug=DICUMAROL	-6.7
3716	O([C@H]1[C@@H](O)[C@H](O)[C@H](O)[C@H](CO)O1)c1c(O)cc2OC(=O)C=Cc2c1	Traditional Herbal Isolate=aesculin Indian Approved Name=esculoside NPC Approved Name=esculoside anhydride	-6.7
3842	O=C1O[C@@H](c2cocc2)C[C@@]2(C)[C@H]1CC(=O)[C@@H]1[C@H]3C(=O)OC(C3)C[C@H]21	Traditional Herbal Isolate=diosbulbin	-6.7
3875	O=C1O[C@@]2(C)OC34[C@@H]5[C@H]([C@]6(C)C(=CC5)C[C@H](O)CC6)CCC13[C@@H]2CC4	Traditional Herbal Isolate=adonilide	-6.7
3881	O=C1O[C@@]2(C)OC34[C@H]5[C@H]([C@@]6(C)C(=CC5)C[C@H](O)CC6)CCC13[C@H]2CC4	Traditional Herbal Isolate=adonilide	-6.7
3907	[N+H](C)(C)[C@H]1CC=2[C@@](C)([C@@H]3[C@@H]([C@H]4[C@]5([C@H]([C@@H](C)[N+H2]C5)CC4)CC3)CC=2)CC1	Traditional Herbal Isolate=conessimine	-6.7
3958	O=C1N(C)c2c3c(cc4OCOc4c3)ccc2-c2c1c1OCOc1cc2	Traditional Herbal Isolate=oxysanguinarine	-6.7
4005	Oc1cc2c(cc1)C[C@@H]1[N+@H](CCc3ccccc3)CC[C@@]32[C@H]1CCCC3	US Illegal/Scheduled Drug (Schedule 1)=Phenomorphan	-6.7
4024	O=C1N2[C@@H]3[C@@H]4[C@H](OCC=C5[C@@H]4C[C@@H]4[N+]([O-])(C5)CC[C@@]34c3c2cccc3)C1	Traditional Herbal Isolate=strychnin n-oxide	-6.7
4025	O=C([O-])c1ccc(C(=O)Nc2cc3C(C)(C)CCC(C)(C)c3cc2)cc1	NPC Approved Name=tamibarotene	-6.7
4318	O=C(C[N+@H]1[C@@H]2[C@H]3C(c4c(ccc(O)c4)C2)(CC1)CCCC3)c1ccccc1	US Illegal/Scheduled Drug (Schedule 1)=Levophenacylmorphan	-6.7
4390	O(c1cc2c([C@H]3[C@@H]([C@@H]4[C@](C)([C@@](O)(C#C)CC4)CC3)CC2)cc1)C1CCCC1	FDA Approved Drug=QUINESTROL	-6.7
4409	O(C)c1cc2c(N3C(=O)C[C@H]4OCC=C5[C@@H]6[C@H]4[C@@H]3C32[C@H]([N+H](C5)CC3)C6)cc1	Traditional Herbal Isolate=beta- colubrine	-6.7
4428	O[C@@H](C)[C@@]1(O)[C@]2(C)[C@@H](O)C[C@@H]3[C@]4(C)C(=CC[C@H]3[C@]2(O)CC1)C[C@H](O)CC4	Traditional Herbal Isolate=utendin	-6.7
4446	S(=O)(=O)(O[C@H]1CC=2[C@@](C)([C@@H]3[C@@H]([C@@H]4[C@](C)(C(=O)CC4)CC3)CC=2)CC1)[O-]	Traditional Herbal Isolate=3beta- hydroxyeremophile mophilenolide	-6.7
4515	O=C(OC)C=1[C@H]2[C@H]([C@H](C)OC=1)C[N+H]1[C@@H](C3(C(=O)Nc4c3cccc4)CC1)C2	Traditional Herbal Isolate=uncarine f	-6.7
4516	O=C(OC)C=1[C@H]2[C@H]([C@@H](C)OC=1)C[N+H]1[C@@H](C3(C(=O)Nc4c3cccc4)CC1)C2	Traditional Herbal Isolate=uncarine f	-6.7
4531	O=C(OC)C=1[C@H]2[C@H]([C@@H](C)OC=1)C[N+H]1[C@@H]([C@@]3(C(=O)Nc4c3cccc4)CC1)C2	Traditional Herbal Isolate=pteropodine	-6.7
4537	Clc1ccc(C(=O)N[C@H](C(=O)[O-])CC=2c3c(NC(=O)C=2)cccc3)cc1	Indian Approved Name=rebamipide	-6.7
4547	O[C@@H]1O[C@H]2[C@H]([N+@@H](C)CCc3c2cc2OCOc2c3)c2c1c1OCOc1cc2	Traditional Herbal Isolate=rhoeagenine	-6.7
4552	O[C@@H]1O[C@@H]2[C@@H]([N+@H](C)CCc3c2cc2OCOc2c3)c2c1c1OCOc1cc2	Traditional Herbal Isolate=rhoeagenine	-6.7
4640	O=C([O-])[C@@H](C(=O)N[C@H]1C(=O)N2[C@@H](C(=O)[O-])C(C)(C)S[C@H]12)c1ccccc1	China Approved Name=carbenicillin sodium Indian Approved Name=carbenicillin disod FDA Approved Drug=CARBENICILLIN DISODIUM	-6.7
4650	O(Cc1ccccc1)c1c2O[C@H]3[C@H](O)C=C[C@H]4[C@H]5[N+@@H](C)CC[C@]34c2c(cc1)C5	US Illegal/Scheduled Drug (Schedule 1)=Benzylmorphine	-6.7
4663	O(CC)[C@H]1N(C)c2c3c(cc4OCOc4c3)ccc2-c2c1c1OCOc1cc2	Traditional Herbal Isolate=ethoxysanguinarine	-6.7
4715	O(c1cc2c([C@@H]3[C@H]([C@@H]4[C@@](C)([C@@](O)(C#C)[C@H](O)C4)CC3)CC2)cc1)C1CCCC1	China Approved Name=nilestriol	-6.7
4738	O=C1N2[C@@H]3[C@@H]4[C@@]5(O)C(=CCO[C@H]4C1)C[N+@@H](C)CCC3(C(=O)C5)c1c2cccc1	Traditional Herbal Isolate=icajine	-6.7
4831	O=C1OC=C([C@H]2[C@@]3(C)[C@]4(O[C@@H]4C2)[C@H]2[C@H]([C@@]4(C)[C@H](C[C@@H](O)CC4)CC2)CC3)C=C1	NPC Approved Name=bufogenin	-6.7
4834	O=C1OC=C([C@H]2[C@@]3(C)[C@]4(O[C@@H]4C2)[C@@H]2[C@@H]([C@@]4(C)[C@H](C[C@@H](O)CC4)CC2)CC3)C=C1	NPC Approved Name=bufogenin	-6.7
4863	O=C[C@@H](O)[C@H](O)[C@H](O)COc1c2C(=O)c3c(C(=O)c2cc(CO)c1)cccc3	Traditional Herbal Isolate=aloins	-6.7
4873	O=C(O[C@@H]1[C@@]2(C)[C@@H]([C@@H]3[C@@H]([C@]4(C)C(=CC(=O)CC4)CC3)CC2)CC1)CCC(C)C	NPC Approved Name=androst-4-en-3-one 17-((4-methyl-1-oxopentyl)oxy)- (17beta)-	-6.7
4888	[S@@H0](=O)(C)c1cc2N(CC[C@@H]3[N+@@H](C)CCCC3)c3c(Sc2cc1)cccc3	FDA Approved Drug=MESORIDAZINE BESYLATE	-6.7
4892	[S@H0](=O)(C)c1cc2N(CC[C@@H]3[N+@@H](C)CCCC3)c3c(Sc2cc1)cccc3	FDA Approved Drug=MESORIDAZINE BESYLATE	-6.7
4947	O=C(C(C)C)c1c(O)c2C(c3ccccc3)=CC(=O)Oc2c2c1OC(C)(C)C=C2	Traditional Herbal Isolate=mesuagin	-6.7
4995	O(CCc1c(C)oc(-c2ccccc2)n1)c1ccc(C[C@H]2C(=O)ONC2=O)cc1	NPC Approved Name=reglitazar	-6.7
5064	O([C@H](COC(=O)Nc1ccccc1)C[N+H]1CCCCC1)C(=O)Nc1ccccc1	NPC Approved Name=3-piperidino-1 2-propanediol dicarbanilate ester	-6.7
5076	O[C@H]1CC=2[C@](C)([C@@H]3[C@H]([C@H]4[C@@](C)([C@@H]5[C@@H](C)[C@H]6[N+H]([C@H]5C4)C[C@@H](C)CC6)CC3)CC=2)CC1	Traditional Herbal Isolate=solanidine	-6.7
5087	O[C@H]1CC=2[C@@](C)([C@H]3[C@H]([C@@H]4[C@](C)([C@@H]5[C@@H](C)[C@@H]6[N+H]([C@@H]5C4)C[C@H](C)CC6)CC3)CC=2)CC1	Traditional Herbal Isolate=solanidine	-6.7
5098	O([C@@H]1[C@H](O)[C@@H](O)[C@@H](O)[C@H](CO)O1)C1=C(c2ccccc2)Oc2c(C1=O)cccc2	Traditional Herbal Isolate=irridoid glycosides;purpureal glycosides	-6.7
5103	O([C@@H]1[C@H](O)[C@H](O)[C@@H](O)[C@@H](CO)O1)C1=C(c2ccccc2)Oc2c(C1=O)cccc2	Traditional Herbal Isolate=irridoid glycosides;purpureal glycosides	-6.7
5109	O([C@@H]1[C@H](O)[C@H](O)[C@H](O)[C@@H](CO)O1)C1=C(c2ccccc2)Oc2c(C1=O)cccc2	Traditional Herbal Isolate=irridoid glycosides;purpureal glycosides	-6.7
5128	O[C@@H]1C[C@H]2[C@](C)([C@H]3[C@H]([C@@H]4[C@@](C)([C@H]([C@H](/C=C/[C@H](C(C)C)C)C)CC4)CC3)CC2)CC1	Traditional Herbal Isolate=spongesterol	-6.7
5130	O[C@H]1C[C@H]2[C@](C)([C@H]3[C@@H]([C@H]4[C@](C)([C@H]([C@@H](/C=C/[C@H](C(C)C)C)C)CC4)CC3)CC2)CC1	Traditional Herbal Isolate=spongesterol	-6.7
5133	O[C@@H]1C[C@@H]2[C@](C)([C@@H]3[C@H]([C@H]4[C@](C)([C@@H]([C@H](/C=C/[C@H](C(C)C)C)C)CC4)CC3)CC2)CC1	Traditional Herbal Isolate=spongesterol	-6.7
5138	O[C@@H]1C[C@@H]2[C@](C)([C@H]3[C@@H]([C@@H]4[C@@](C)([C@@H]([C@H](/C=C/[C@H](C(C)C)C)C)CC4)CC3)CC2)CC1	Traditional Herbal Isolate=spongesterol	-6.7
5283	C(C)(C)[C@@H]1[C@@]2(C)[C@@H]([C@]3(C)[C@@](C)([C@H]4[C@](C)([C@H]5[C@](C)(C(C)=CCC5)CC4)CC3)CC2)CC1	Traditional Herbal Isolate=filicene	-6.7
5324	O=C(C)[C@@H]1[C@H]2[C@](C)([C@@H]3[C@@](C)([C@]4(C)[C@H]([C@]5(C)[C@@H](C(C)(C)CCC5)CC4)CC3)CC2)CC1	Traditional Herbal Isolate=adiantone	-6.7
5330	O=C(C)[C@@H]1[C@H]2[C@@](C)([C@H]3[C@](C)([C@]4(C)[C@H]([C@]5(C)[C@H](C(C)(C)CCC5)CC4)CC3)CC2)CC1	Traditional Herbal Isolate=adiantone	-6.7
5350	Clc1c(CC[N+H]2CCN(c3nsc4c3cccc4)CC2)cc2c(NC(=O)C2)c1	Indian Approved Name=ziprasidone Australia Approved Name=ZIPRASIDONE HYDROCHLORIDE FDA Approved Drug=ZIPRASIDONE HYDROCHLORIDE;ZIPRASIDONE MESYLATE	-6.7
5362	O=C(OCC(=O)[C@@H]1[C@]2(C)[C@H]([C@H]3[C@@H]([C@]4(C)C(=CC(=O)CC4)CC3)CC2)CC1)C(C)(C)C	FDA Approved Drug=DESOXYCORTICOSTERONE PIVALATE	-6.7
5366	O=C(OCC(=O)[C@H]1[C@@]2(C)[C@H]([C@H]3[C@@H]([C@]4(C)C(=CC(=O)CC4)CC3)CC2)CC1)C(C)(C)C	FDA Approved Drug=DESOXYCORTICOSTERONE PIVALATE	-6.7
5369	O=C(OCC(=O)[C@H]1[C@@]2(C)[C@@H]([C@H]3[C@H]([C@]4(C)C(=CC(=O)CC4)CC3)CC2)CC1)C(C)(C)C	FDA Approved Drug=DESOXYCORTICOSTERONE PIVALATE	-6.7
5412	S(C(=O)C)[C@H]1[C@H]2[C@@H]3[C@@](C)([C@@]4(OC(=O)CC4)CC3)CC[C@H]2[C@]2(C)C(=CC(=O)CC2)C1	China Approved Name=spironolactone Indian Approved Name=spironolactone WHO Essential Medicine=spironolactone Australia Approved Name=SPIRONOLACTONE FDA Approved Drug=SPIRONOLACTONE	-6.7
5421	O[C@H]1C[C@@H]2[C@@](C)([C@H]3[C@@H]([C@@H]4[C@](C)([C@@H]5[C@@H](C)C6(O[C@@H]5C4)OC[C@H](C)CC6)CC3)CC2)CC1	Traditional Herbal Isolate=tigogenin;sarsasapogenin	-6.7
5423	O[C@@H]1C[C@@H]2[C@@](C)([C@@H]3[C@H]([C@@H]4[C@@](C)([C@H]5[C@H](C)C6(O[C@@H]5C4)OC[C@@H](C)CC6)CC3)CC2)CC1	Traditional Herbal Isolate=tigogenin;sarsasapogenin	-6.7
5425	O[C@H]1C[C@H]2[C@](C)([C@@H]3[C@H]([C@@H]4[C@@](C)([C@@H]5[C@H](C)C6(O[C@@H]5C4)OC[C@H](C)CC6)CC3)CC2)CC1	Traditional Herbal Isolate=tigogenin;sarsasapogenin	-6.7
5434	O[C@H]1[C@@]2(C)[C@@H]3[C@@H]([C@@H]4[C@](C)([C@H]5[C@H](C)[C@]6(O[C@@H]5C4)OC[C@@H](C)CC6)CC3)CC[C@@H]2CCC1	Traditional Herbal Isolate=spirostanol saponins	-6.7
5455	O([C@H]1[C@@H](O)[C@H](O)[C@H](O)[C@H](CO)O1)c1ccc([C@H]2Oc3c(C(=O)C2)ccc(O)c3)cc1	Traditional Herbal Isolate=liquiritin	-6.7
5610	O=CC=1[C@]2(C)[C@@H]([C@]3(C)[C@H]([C@@]4(C)[C@](C)([C@@H]5[C@](C)([C@@H](C(C)C)CC5)CC4)CC3)CC2)CCC=1	Traditional Herbal Isolate=filicenal	-6.7
5619	O=C1C(C)(C)[C@@H]2[C@@](C)(C=3[C@H]([C@@]4(C)[C@](C)([C@H]5[C@@](C)([C@@H](C(C)C)CC5)CC4)CC=3)CC2)CC1	Traditional Herbal Isolate=arborinone	-6.7
5621	O=C1C(C)(C)[C@@H]2[C@@](C)(C=3[C@H]([C@@]4(C)[C@@](C)([C@@H]5[C@@](C)([C@H](C(C)C)CC5)CC4)CC=3)CC2)CC1	Traditional Herbal Isolate=arborinone	-6.7
5627	O=C1C(C)(C)[C@H]2[C@@](C)(C=3[C@@H]([C@@]4(C)[C@@](C)([C@H]5[C@](C)([C@H](C(C)C)CC5)CC4)CC=3)CC2)CC1	Traditional Herbal Isolate=arborinone	-6.7
5636	O=C1C(C)(C)[C@@H]2[C@@](C)([C@H]3[C@@](C)([C@]4(C)C([C@@H]5[C@H](C)[C@H](C)CC[C@]5(C)CC4)=CC3)CC2)CC1	Traditional Herbal Isolate=amyrenone	-6.7
5644	O(C)c1c(OC)cc2c(N3C(=O)C[C@H]4OCC=C5[C@@H]6[C@H]4[C@H]3[C@@]2(C(=O)C6)CC[N+@H](C)C5)c1	Traditional Herbal Isolate=novacine	-6.7
5669	O=C(O[C@H]1[C@@H](OC(=O)/C=C(\C)/C)c2c(OC1(C)C)cc1OC(=O)C=Cc1c2)/C=C(\C)/C	Traditional Herbal Isolate=decursidin	-6.7
5672	O=C1[C@@H]2[C@]3(C)C(=CC[C@@H]2[C@H]2C1=C(C)[C@@]1([C@H](C)[C@H]4[N+H2]C[C@@H](C)C[C@H]4O1)CC2)C[C@@H](O)CC3	Traditional Herbal Isolate=jervine	-6.7
5679	O=C1[C@H]2[C@@](C)([C@]3(C)[C@H]([C@@]4(C)[C@H](C(C)(C)CCC4)CC3)C1)CC[C@@]1(C)[C@@H]2[C@@H](C(C)C)CC1	Traditional Herbal Isolate=clerodone	-6.7
5691	O[C@@H]1C(C)(C)[C@H]2[C@](C)(C=3[C@H]([C@@]4(C)[C@](C)([C@@H]5[C@](C)([C@@H](C(C)C)CC5)CC4)CC=3)CC2)CC1	Traditional Herbal Isolate=fernenol	-6.7
5709	Fc1cc2onc(C3CC[N+H](CCC=4C(=O)N5C([C@H](O)CCC5)=NC=4C)CC3)c2cc1	FDA Approved Drug=PALIPERIDONE Indian Approved Name=paliperidone	-6.7
5720	O[C@@H]1CC23[C@](C)([C@@H]4C(OO2)([C@H]2[C@@](C)([C@@H]([C@@H](/C=C/[C@@H](C(C)C)C)C)CC2)CC4)C=C3)CC1	Traditional Herbal Isolate=ergosterol peroxide	-6.7
5722	O[C@@H]1CC23[C@](C)([C@@H]4C(OO2)([C@H]2[C@](C)([C@@H]([C@@H](/C=C/[C@H](C(C)C)C)C)CC2)CC4)C=C3)CC1	Traditional Herbal Isolate=ergosterol peroxide	-6.7
5734	O[C@@H]1CC23[C@@](C)([C@H]4C(OO2)([C@@H]2[C@](C)([C@@H]([C@@H](/C=C/[C@@H](C(C)C)C)C)CC2)CC4)C=C3)CC1	Traditional Herbal Isolate=ergosterol peroxide	-6.7
5737	O[C@@]1(C)OCC23[C@H]4[C@@](C)([C@@]5(C)[C@H]([C@]6(C)[C@@H](C(C)(C)CCC6)CC5)CC4)CC[C@@H]2[C@@H]1CC3	Traditional Herbal Isolate=adipedatol	-6.7
5739	O[C@@]1(C)OCC23[C@@H]4[C@@](C)([C@@]5(C)[C@@H]([C@]6(C)[C@@H](C(C)(C)CCC6)CC5)CC4)CC[C@@H]2[C@@H]1CC3	Traditional Herbal Isolate=adipedatol	-6.7
5743	O[C@@]1(C)OCC23[C@@H]4[C@@](C)([C@@]5(C)[C@H]([C@]6(C)[C@@H](C(C)(C)CCC6)CC5)CC4)CC[C@@H]2[C@H]1CC3	Traditional Herbal Isolate=adipedatol	-6.7
5745	O[C@]1(C)OCC23[C@H]4[C@](C)([C@@]5(C)[C@H]([C@]6(C)[C@@H](C(C)(C)CCC6)CC5)CC4)CC[C@@H]2[C@@H]1CC3	Traditional Herbal Isolate=adipedatol	-6.7
5747	O[C@]1(C)OCC23[C@@H]4[C@](C)([C@@]5(C)[C@@H]([C@]6(C)[C@H](C(C)(C)CCC6)CC5)CC4)CC[C@@H]2[C@@H]1CC3	Traditional Herbal Isolate=adipedatol	-6.7
5748	O[C@]1(C)OCC23[C@@H]4[C@@](C)([C@@]5(C)[C@H]([C@]6(C)[C@H](C(C)(C)CCC6)CC5)CC4)CC[C@@H]2[C@H]1CC3	Traditional Herbal Isolate=adipedatol	-6.7
5753	O[C@H]1[C@H](C)[C@@]2(C)[C@@H]([C@@]3(C)[C@@H]([C@]4(C)[C@@](C)([C@@H]5[C@](C)(CC4)CCC(C)(C)C5)CC3)CC2)CC1	Traditional Herbal Isolate=epi-friedelanol;epifriedelinol;epi-friedelinol;epifriedelanol	-6.7
5767	O=C(OCC)[C@@H]([N+H2][C@@H](C(=O)N1[C@@H](C(=O)[O-])C[C@@H]2[C@@H]1CCCC2)C)CCc1ccccc1	FDA Approved Drug=TRANDOLAPRIL	-6.7
5790	O([C@@H]1[C@@H](O)[C@H](O)[C@@H](O)[C@@H](CO)O1)c1cc([O-])c2C(=O)C(c3ccc(O)cc3)=COc2c1	Indian Approved Name=genistin	-6.7
5819	F[C@@]12[C@@H](O)C[C@@]3(C)[C@](O)(C(=O)COC(=O)C)C(=C)C[C@@H]3[C@@H]1CCC=1[C@@]2(C)C=CC(=O)C=1	NPC Approved Name=fluprednidene acetate	-6.7
5841	F[C@@]12[C@H](O)C[C@@]3(C)[C@@](O)(C(=O)COC(=O)C)[C@@H](C)C[C@H]3[C@H]1CCC=1[C@@]2(C)C=CC(=O)C=1	FDA Approved Drug=BETAMETHASONE ACETATE	-6.7
5919	O=C1[C@@H](C)[C@@]2(C)[C@@H]([C@@]3(C)[C@H](C(=O)C2)[C@@]2(C)[C@](C)([C@H]4[C@@](C)(CC2)CCC(C)(C)C4)CC3)CC1	Traditional Herbal Isolate=putranjivadione	-6.7
5926	O=C1[C@H](C)[C@@]2(C)[C@H]([C@@]3(C)[C@H](C(=O)C2)[C@@]2(C)[C@](C)([C@H]4[C@](C)(CC2)CCC(C)(C)C4)CC3)CC1	Traditional Herbal Isolate=putranjivadione	-6.7
5934	O=C1C(C)(C)[C@H]2[C@](C)([C@H]3C([C@]4(C)[C@](C)([C@@H]([C@@H](CC/C=C(\C)/C)C)[C@H](O)C4)CC3)=CC2)CC1	Traditional Herbal Isolate=kulinone	-6.7
5948	O=C1C(C)(C)[C@@H]2[C@@](C)([C@@H]3C([C@@]4(C)[C@](C)([C@H]([C@H](CC/C=C(\C)/C)C)[C@H](O)C4)CC3)=CC2)CC1	Traditional Herbal Isolate=kulinone	-6.7
5962	O=C(N)c1oc2c(c1)cc(N1CC[N+H](CCCCc3c4c([nH]c3)ccc(C#N)c4)CC1)cc2	FDA Approved Drug=VILAZODONE HYDROCHLORIDE	-6.7
5986	OC[C@@]12[C@@H](C=3[C@](C)([C@@]4(C)[C@@H]([C@]5(C)[C@H](C(C)(C)[C@@H](O)CC5)CC4)CC=3)CC1)CC(C)(C)CC2	Traditional Herbal Isolate=erythrodiol monocaprylate	-6.7
5990	O[C@@H]1[C@]2(C)[C@H](C=3[C@@](C)([C@]4(C)[C@@H]([C@]5(C)[C@H](C(C)(C)[C@@H](O)CC5)CC4)CC=3)CC2)CC(C)(C)C1	Traditional Herbal Isolate=sophoradiol	-6.7
5996	O[C@@H]1[C@]2(C)[C@@H](C=3[C@@](C)([C@]4(C)[C@@H]([C@]5(C)[C@@H](C(C)(C)[C@@H](O)CC5)CC4)CC=3)CC2)CC(C)(C)C1	Traditional Herbal Isolate=sophoradiol	-6.7
5999	O[C@@H]1[C@]2(C)[C@@H]([C@@H](C)C(C)=CC2)[C@H]2[C@](C)([C@]3(C)[C@@H]([C@@]4(C)[C@H](C(C)(C)[C@@H](O)CC4)CC3)CC2)C1	Traditional Herbal Isolate=faradiol	-6.7
6020	Clc1cc2/C(=C/CC[N+H]3CCN(CCOC(=O)C)CC3)/c3c(Sc2cc1)cccc3	Indian Approved Name=zuclopenthixol acetate Australia Approved Name=ZUCLOPENTHIXOL ACETATE	-6.7
6025	O=C(N[C@@H](COC(=O)C)Cc1ccccc1)[C@@H](NC(=O)c1ccccc1)Cc1ccccc1	Traditional Herbal Isolate=aurantiamide acetate	-6.7
6040	O(C)c1c([C@@H]2[C@@H](O)[C@@H](O)[C@@H](O)[C@@H](CO)O2)c([O-])c2C(=O)C=C(c3ccc(O)cc3)Oc2c1	Traditional Herbal Isolate=swertisin	-6.7
6042	O(C)c1c([C@@H]2[C@H](O)[C@@H](O)[C@@H](O)[C@@H](CO)O2)c([O-])c2C(=O)C=C(c3ccc(O)cc3)Oc2c1	Traditional Herbal Isolate=swertisin	-6.7
6048	O(C)c1c([C@H]2[C@@H](O)[C@H](O)[C@H](O)[C@@H](CO)O2)c([O-])c2C(=O)C=C(c3ccc(O)cc3)Oc2c1	Traditional Herbal Isolate=swertisin	-6.7
6051	O(C)c1ccc(C=2Oc3c(c([O-])cc(O[C@H]4[C@@H](O)[C@H](O)[C@H](O)[C@H](CO)O4)c3)C(=O)C=2)cc1	Traditional Herbal Isolate=acacetin-7-glucoside	-6.7
6052	O([C@H]1[C@@H](O)[C@H](O)[C@@H](O)[C@@H](CO)O1)c1cc([O-])c2C(=O)C([O-])=C(c3ccc(O)cc3)Oc2c1	Traditional Herbal Isolate=kaempferol-3-galactoside daempferol	-6.7
6075	O(C)c1cc(O[C@H]2[C@@H](O)[C@H](O)[C@H](O)[C@H](CO)O2)c2C(=O)C(c3ccc(O)cc3)=COc2c1	Traditional Herbal Isolate=prunetinoside	-6.7
6106	O([C@H]1[C@@H](O)[C@H](O)[C@H](O)[C@H](CO)O1)c1cc(O)c([C@@H]2C(=O)c3c([O-])cc(O)cc3OC2)cc1	Traditional Herbal Isolate=dalbergion	-6.7
6107	O([C@H]1[C@@H](O)[C@H](O)[C@H](O)[C@H](CO)O1)c1cc(O)c([C@H]2C(=O)c3c([O-])cc(O)cc3OC2)cc1	Traditional Herbal Isolate=dalbergion	-6.7
6115	O=C([O-])[C@H](NC(=O)c1ccc(N(Cc2cc3C(=O)N=C(N)Nc3cc2)C)cc1)CCC(=O)[O-]	Indian Approved Name=l-methylfolate	-6.7
6120	O=C([O-])[C@H](NC(=O)c1ccc(N(Cc2nc3c(N)nc(N)nc3nc2)C)cc1)CCC(=O)[O-]	China Approved Name=methotrexate Indian Approved Name=methotrexate WHO Essential Medicine=methotrexate Australia Approved Name=METHOTREXATE FDA Approved Drug=METHOTREXATE SODIUM	-6.7
6144	O=C([O-])[C@H](CC/C=C(\C)/C)[C@@H]1[C@@]2(C)[C@](C)(C3=C([C@@]4(C)[C@H](C(C)(C)C(=O)CC4)CC3)CC2)CC1	Traditional Herbal Isolate=pinicolic acid	-6.7
6170	O=C([O-])[C@@]12[C@@H](C=3[C@](C)([C@]4(C)[C@@H]([C@@]5(C)[C@H](C(C)(C)[C@H](O)CC5)CC4)CC=3)CC1)CC(C)(C)CC2	Traditional Herbal Isolate=pentacyclic triterpene	-6.7
6189	O=C([O-])[C@@]1(C)[C@@H](O)CC[C@]2(C)[C@H]1CC[C@]1(C)[C@]3(C)[C@H]([C@@]4(C)[C@H]([C@H](C(=C)C)CC4)CC3)CC[C@H]21	Traditional Herbal Isolate=woodwardic acid	-6.7
6226	O=C(O[C@@H]1C=2[C@](C)([C@H]3[C@](O)([C@]4(O)[C@@](C)([C@H](C5=COC(=O)C=C5)CC4)CC3)C1)CC[C@H](O)C=2)C	Traditional Herbal Isolate=irridoid glycoside-sambacin;lepitidine glycoside;glycoside pharbitin;glycoside rhaphantin	-6.7
6232	O=C(O[C@@H]1C=2[C@](C)([C@H]3[C@@](O)([C@]4(O)[C@](C)([C@@H](C5=COC(=O)C=C5)CC4)CC3)C1)CC[C@@H](O)C=2)C	Traditional Herbal Isolate=irridoid glycoside-sambacin;lepitidine glycoside;glycoside pharbitin;glycoside rhaphantin	-6.7
6240	O(CC[N+H]1CCCC1)c1ccc([C@H]2[C@H](c3ccccc3)C(C)(C)Oc3c2ccc(OC)c3)cc1	Indian Approved Name=centchroman;ormeloxifene	-6.7
6251	OC[C@@]1(C)[C@H](O)CC[C@]2(C)[C@@H]1CC[C@@]1(C)[C@H]2CC[C@H]2[C@]3(C)[C@H](C(C)(C)[C@H](O)CC3)CC=C2C1	Traditional Herbal Isolate=lycoclavanol	-6.7
6259	O=C(OCC(=O)[C@@]1(O)[C@@]2(C)[C@@H]([C@@H]3[C@@H]([C@@H](O)C2)[C@@]2(C)C(=CC(=O)C=C2)CC3)CC1)CCC(=O)[O-]	NPC Approved Name=prednisolone succinate	-6.7
6288	O[C@@H]1C(C)(C)[C@H]2[C@](C)([C@H]3[C@](O)(C[C@@]4(C)[C@@H]([C@@]5(C)[C@H](C(C)(C)[C@@H](O)CC5)CC4)CC3)CC2)CC1	Traditional Herbal Isolate=tohogenol	-6.7
6305	O(C)c1c(O)ccc(C=2Oc3c([C@@H]4[C@H](O)[C@@H](O)[C@H](O)[C@H](CO)O4)c(O)cc([O-])c3C(=O)C=2)c1	Traditional Herbal Isolate=scoparin	-6.7
6306	O(C)c1c(O)ccc(C=2Oc3c([C@@H]4[C@H](O)[C@H](O)[C@H](O)[C@H](CO)O4)c(O)cc([O-])c3C(=O)C=2)c1	Traditional Herbal Isolate=scoparin	-6.7
6308	O(C)c1c(O)ccc(C=2Oc3c([C@H]4[C@H](O)[C@@H](O)[C@@H](O)[C@@H](CO)O4)c(O)cc([O-])c3C(=O)C=2)c1	Traditional Herbal Isolate=scoparin	-6.7
6311	O(C)c1c(O)ccc(C=2Oc3c([C@@H]4[C@@H](O)[C@H](O)[C@@H](O)[C@@H](CO)O4)c(O)cc([O-])c3C(=O)C=2)c1	Traditional Herbal Isolate=scoparin	-6.7
6313	O(C)c1c(O)ccc(C=2Oc3c([C@@H]4[C@@H](O)[C@@H](O)[C@H](O)[C@@H](CO)O4)c(O)cc([O-])c3C(=O)C=2)c1	Traditional Herbal Isolate=scoparin	-6.7
6314	O(C)c1c(O)ccc(C=2Oc3c([C@@H]4[C@H](O)[C@@H](O)[C@H](O)[C@@H](CO)O4)c(O)cc([O-])c3C(=O)C=2)c1	Traditional Herbal Isolate=scoparin	-6.7
6316	O(C)c1c(O)ccc(C=2Oc3c([C@@H]4[C@H](O)[C@H](O)[C@H](O)[C@@H](CO)O4)c(O)cc([O-])c3C(=O)C=2)c1	Traditional Herbal Isolate=scoparin	-6.7
6317	O(C)c1c([O-])c2C(=O)C(c3ccc(O)cc3)=COc2cc1O[C@H]1[C@@H](O)[C@H](O)[C@H](O)[C@H](CO)O1	Traditional Herbal Isolate=tectoridin	-6.7
6323	O([C@H]1[C@@H](O)[C@H](O)[C@H](O)[C@H](CO)O1)c1cc([O-])c2C(=O)C([O-])=C(c3cc(O)c(O)cc3)Oc2c1	Traditional Herbal Isolate=gossypitrin;quercimeritrin	-6.7
6341	Clc1c2[C@H](O)[C@@H]3C(C(=O)c2c([O-])cc1)=C([O-])[C@]1(O)C(=O)C(C(=O)N)=C([O-])[C@H]([N+H](C)C)[C@H]1C3	Indian Approved Name=demeclocycline hcl FDA Approved Drug=DEMECLOCYCLINE HYDROCHLORIDE	-6.7
6346	O(C[C@@H]1[C@H](O)[C@@H](O)[C@H](O)[C@@H](O)O1)C1=C(c2cc(O)c(O)cc2)Oc2c(c([O-])cc(O)c2)C1=O	Traditional Herbal Isolate=isoquercetrin;iso-quercitrin	-6.7
6367	O=C(OCC=1[C@H]2[C@H](O[C@H]3[C@@H](O)[C@H](O)[C@H](O)[C@H](CO)O3)OC=C[C@H]2[C@H](O)C=1)c1ccc(O)cc1	Traditional Herbal Isolate=agnuside	-6.7
6399	O=C(O[C@@H]1C(C)(C)[C@@H]2[C@@](C)([C@@H]3[C@](C)(C=4[C@](C)([C@@H]5[C@](C)(CC=4)CCC(C)(C)C5)CC3)CC2)CC1)C	Traditional Herbal Isolate=taraxerol acetate	-6.7
6414	O=C1C(CO)=C(C)C[C@H]([C@@H](C)[C@@H]2[C@@]3(C)[C@@H]([C@@H]4[C@@H]([C@@]5(C)C(=O)C=C[C@@H](O)[C@@]65O[C@@H]6C4)CC3)CC2)O1	Traditional Herbal Isolate=withaferin a	-6.7
6431	O[C@H](CCC[N+H]1CCC(C(O)(c2ccccc2)c2ccccc2)CC1)c1ccc(C(C)(C)C)cc1	Indian Approved Name=terfenadine	-6.7
6435	O[C@@H]1C(C)(C)[C@@H]2[C@](C)([C@H]3[C@@](C)(C45[C@H]([C@@H]6[C@@](O)(C)C[C@H](/C=C(\C)/C)OC6(OC4)C5)CC3)CC2)CC1	Traditional Herbal Isolate=jujubogenin	-6.7
6446	O[C@@H]1C(C)(C)[C@H]2[C@](C)([C@@H]3[C@@](C)(C45[C@@H]([C@H]6[C@](O)(C)C[C@@H](/C=C(\C)/C)OC6(OC4)C5)CC3)CC2)CC1	Traditional Herbal Isolate=jujubogenin	-6.7
6454	O[C@@H]1[C@@H]([C@H]2[C@]3(C)[C@](C)(C=4[C@@H]([C@]5(C)[C@H](C(C)(C)[C@@H](O)CC5)CC=4)CC3)CC2)C[C@@H]([C@H]2C(C)(C)O2)O1	Traditional Herbal Isolate=melianol	-6.7
6460	O[C@@H]1[C@@H]([C@H]2[C@@]3(C)[C@](C)(C=4[C@H]([C@]5(C)[C@@H](C(C)(C)[C@@H](O)CC5)CC=4)CC3)CC2)C[C@@H]([C@@H]2C(C)(C)O2)O1	Traditional Herbal Isolate=melianol	-6.7
6463	O[C@@H]1[C@@H]([C@H]2[C@]3(C)[C@](C)(C=4[C@H]([C@]5(C)[C@@H](C(C)(C)[C@@H](O)CC5)CC=4)CC3)CC2)C[C@@H]([C@@H]2C(C)(C)O2)O1	Traditional Herbal Isolate=melianol	-6.7
6483	S([C@H]1C[C@@H](C(=O)Nc2cc(C(=O)[O-])ccc2)[N+H2]C1)C=1[C@@H](C)[C@@H]2[C@H]([C@H](O)C)C(=O)N2C=1C(=O)[O-]	Indian Approved Name=ertapenem FDA Approved Drug=ERTAPENEM SODIUM	-6.7
6490	O=C1[C@H]([C@@H]2[C@]3(C)[C@H]([C@]4(C)[C@@H](O)C[C@@H]5C(C)(C)[C@@H](O)CC[C@]5(C)[C@H]4CC3)CC2)C[C@@H](CC(C)C)O1	Traditional Herbal Isolate=melialactone	-6.7
6502	O=C([O-])[C@H](NC(=O)c1ccc([C@@H](CC#C)Cc2nc3c(N)nc(N)nc3nc2)cc1)CCC(=O)[O-]	FDA Approved Drug=PRALATREXATE	-6.7
6537	O(C)c1c(O)c2c([C@H]3[N+H](C[C@H](CC)[C@H](C[C@@H]4[N+H2]CCc5c6c([nH]c45)cccc6)C3)CC2)cc1OC	Traditional Herbal Isolate=alangimarckine	-6.7
6590	O=C(O[C@@H]1[C@H]2[C@@](CO)(O2)[C@H]2[C@@H](O[C@H]3[C@@H](O)[C@H](O)[C@H](O)[C@H](CO)O3)OC=C[C@@H]12)c1ccc(O)cc1	Traditional Herbal Isolate=catalposide	-6.7
6592	O=C(N[C@H]1C(=O)N2[C@@H](C(=O)O[C@@H]3OC(=O)c4c3cccc4)C(C)(C)S[C@H]12)[C@@H]([N+H3])c1ccccc1	NPC Approved Name=talampicillin	-6.7
6696	O=C(O[C@]12[C@H](Oc3c(OC)cc4OCOc4c3)OC[C@H]1[C@H](c1c(OC)cc3OCOc3c1)OC2)C	Traditional Herbal Isolate=phrymarolin-i	-6.7
6708	O=C1[C@H]2C(C)(C)[C@H](O)[C@H](O)C[C@@]2(C)[C@H]2C(=C1)C[C@]1(C)[C@@H]([C@@]3(C)[C@H]([C@](CO)(C)[C@@H](O)CC3)CC1)CC2	Traditional Herbal Isolate=lycoclavanin	-6.7
6741	O[C@H](C(O)(C)C)[C@H]1O[C@H](O)[C@@H]([C@H]2[C@@]3(C)[C@](C)(C=4[C@@H]([C@]5(C)[C@@H](C(C)(C)[C@@H](O)CC5)CC=4)CC3)CC2)C1	Traditional Herbal Isolate=melianotriol	-6.7
6743	O[C@H](C(O)(C)C)[C@H]1O[C@H](O)[C@@H]([C@H]2[C@]3(C)[C@](C)(C=4[C@H]([C@]5(C)[C@@H](C(C)(C)[C@@H](O)CC5)CC=4)CC3)CC2)C1	Traditional Herbal Isolate=melianotriol	-6.7
6752	O=C(N[C@H](C(=O)N[C@H]1C(=O)N2[C@@H](C(=O)[O-])C(C)(C)S[C@H]12)c1ccc(O)cc1)[C@H]([N+H3])CC(=O)NC	NPC Approved Name=aspoxicillin	-6.7
6756	O=C1N(C[C@@H]2[C@H](C[N+H]3CCN(c4nsc5c4cccc5)CC3)CCCC2)C(=O)[C@H]2[C@H]1[C@H]1C[C@@H]2CC1	FDA Approved Drug=LURASIDONE HYDROCHLORIDE	-6.7
6783	O=C(O[C@@H]1C(C)(C)[C@@H]2[C@](C)([C@@H]3[C@](C)([C@]4(C)C([C@@H]5[C@@](C(=O)[O-])(CC4)CCC(C)(C)C5)=CC3)CC2)CC1)C	Traditional Herbal Isolate=acetyl oleanolic acid	-6.7
6788	O=C(O[C@@H]1C(C)(C)[C@H]2[C@](C)([C@@H]3[C@](C)([C@@]4(C)C([C@@H]5[C@@](C(=O)[O-])(CC4)CCC(C)(C)C5)=CC3)CC2)CC1)C	Traditional Herbal Isolate=acetyl oleanolic acid	-6.7
6790	O=C(O[C@@H]1C(C)(C)[C@H]2[C@](C)([C@H]3[C@](C)([C@@]4(C)C([C@@H]5[C@@](C(=O)[O-])(CC4)CCC(C)(C)C5)=CC3)CC2)CC1)C	Traditional Herbal Isolate=acetyl oleanolic acid	-6.7
6820	F[C@@]12[C@@H](O)C[C@@]3(C)[C@]4(C(=O)COC(=O)C)OC5(O[C@H]4C[C@@H]3[C@@H]1CCC=1[C@@]2(C)C=CC(=O)C=1)CCCC5	FDA Approved Drug=AMCINONIDE	-6.7
6875	O=C(OCc1cc(OC(=O)[C@H]2C(C)(C)S[C@H]3[C@@H](NC(=O)Cc4ccccc4)C(=O)N23)ccc1)C(C)C	NPC Approved Name=tobicillin	-6.7
6878	Clc1c(OC(F)(F)[C@H](F)C(F)(F)F)cc(Cl)c(NC(=O)NC(=O)c2c(F)cccc2F)c1	NPC Approved Name=cga 184699	-6.7
6880	O([C@H]1[C@@H](O)[C@H](O)[C@H](O)[C@H](CO)O1)[C@H]1[C@H](C=C)C=2C(C(=O)N3[C@@H](c4[nH]c5c(c4CC3)cccc5)C=2)=C([O-])O1	Traditional Herbal Isolate=naucleoside	-6.7
6890	O=C(OC[C@@]12O[C@@H]1[C@H](O)[C@H]1[C@H]2[C@@H](O[C@@H]2[C@@H](O)[C@@H](O)[C@@H](O)[C@@H](CO)O2)OC=C1)c1cc(OC)c(O)cc1	Traditional Herbal Isolate=kutkoside	-6.7
6893	O=C(OC[C@]12O[C@@H]1[C@@H](O)[C@H]1[C@@H]2[C@@H](O[C@H]2[C@H](O)[C@@H](O)[C@H](O)[C@@H](CO)O2)OC=C1)c1cc(OC)c(O)cc1	Traditional Herbal Isolate=kutkoside	-6.7
6897	ClC(Cl)[C@@H]1[C@@H](C)COC2([C@H](C)[C@@H]3[C@]4(C)[C@H]([C@@H]5[C@@H]([C@@]6(C)[C@@H](O)C[C@@H](O)CC6=CC5)CC4)C[C@H]3O2)C1	Traditional Herbal Isolate=abamagenin	-6.7
6899	ClC(Cl)[C@@H]1[C@@H](C)COC2([C@@H](C)[C@@H]3[C@]4(C)[C@H]([C@H]5[C@@H]([C@]6(C)[C@@H](O)C[C@@H](O)CC6=CC5)CC4)C[C@@H]3O2)C1	Traditional Herbal Isolate=abamagenin	-6.7
6901	ClC(Cl)[C@H]1[C@H](C)COC2([C@@H](C)[C@H]3[C@]4(C)[C@@H]([C@H]5[C@@H]([C@]6(C)[C@@H](O)C[C@@H](O)CC6=CC5)CC4)C[C@H]3O2)C1	Traditional Herbal Isolate=abamagenin	-6.7
6902	ClC(Cl)[C@H]1[C@H](C)COC2([C@H](C)[C@@H]3[C@@]4(C)[C@H]([C@H]5[C@@H]([C@@]6(C)[C@@H](O)C[C@@H](O)CC6=CC5)CC4)C[C@H]3O2)C1	Traditional Herbal Isolate=abamagenin	-6.7
6919	O([C@H](C[C@H](C)C1=C2[C@](C)([C@@]3(C)[C@H]([C@@H](O)C2)[C@]2(C)[C@H](C(C)(C)C(=O)CC2)CC3)CC1)[C@H]1C(C)(C)O1)C(=O)C	Traditional Herbal Isolate=alisol a;alisol b;alisol monoacetate	-6.7
6934	O=C(OCCc1cc(O)c(O)cc1)C=1[C@@H]2[C@@H]([C@H](O)OC=1)[C@H](OCCc1cc(O)c(O)cc1)COC(=O)C2	Traditional Herbal Isolate=jasmolactone b	-6.7
6962	O(C)[C@H]1[C@H](O)[C@H](C)O[C@H](O[C@H]2C[C@@H]3[C@@](C)([C@H]4[C@H]([C@@]5(O)[C@@](C)([C@H](C6=CC(=O)OC6)CC5)CC4)CC3)CC2)C1	Traditional Herbal Isolate=somalin	-6.7
6966	O(C)[C@H]1[C@H](O)[C@H](C)O[C@@H](O[C@@H]2C[C@H]3[C@@](C)([C@H]4[C@H]([C@]5(O)[C@@](C)([C@@H](C6=CC(=O)OC6)CC5)CC4)CC3)CC2)C1	Traditional Herbal Isolate=somalin	-6.7
6989	O([C@@H]1[C@H](O)[C@@H](O)[C@@H](O)[C@H](C)O1)[C@@H]1C[C@H]2[C@@](C)([C@H]3[C@H]([C@]4(O)[C@](C)([C@H](C5=CC(=O)OC5)CC4)CC3)CC2)CC1	Traditional Herbal Isolate=evomonoside	-6.7
6991	O([C@@H]1[C@@H](O)[C@@H](O)[C@@H](O)[C@H](C)O1)[C@@H]1C[C@H]2[C@@](C)([C@H]3[C@H]([C@]4(O)[C@](C)([C@H](C5=CC(=O)OC5)CC4)CC3)CC2)CC1	Traditional Herbal Isolate=evomonoside	-6.7
6999	O([C@H](C)C=1C23C(OCC[N+@@H](C)C2)(C=2C4([C@H](O)C3)[C@@]3(C)[C@H](C[C@@](O)(O4)CC3)CC=2)CC=1)C(=O)c1ccccc1	FDA Approved Drug=incobotulinumtoxinA	-6.7
7027	O=C(O[C@@H]1[C@@]2(O)[C@](C)(C([C@H](C)[C@@H]3OC(=O)C(C)=C(C)C3)=C1)CC[C@@H]1[C@@]3(C)C(=O)C=CC[C@]3(O)[C@H](O)C[C@H]21)C	Traditional Herbal Isolate=withaminimin	-6.7
7065	O=C(O[C@H]1[C@@H](O)[C@@H]2C(C(=O)OC)=CO[C@@H](O[C@H]3[C@H](O)[C@@H](O)[C@H](O)[C@@H](CO)C3)[C@H]2[C@H]1C)/C=C/c1ccccc1	Traditional Herbal Isolate=iridoid glucosides	-6.7
7072	O=C(O[C@H]1[C@@H](O)[C@@H]2C(C(=O)OC)=CO[C@@H](O[C@@H]3[C@@H](O)[C@@H](O)[C@H](O)[C@H](CO)C3)[C@H]2[C@H]1C)/C=C/c1ccccc1	Traditional Herbal Isolate=iridoid glucosides	-6.7
7079	O(C)[C@@H]1[C@@H](O)[C@@H](C)O[C@H](O[C@@H]2C[C@H]3[C@@](C)([C@H]4[C@H]([C@]5(O)[C@](C)([C@@H]([C@@H](O)C5)C5=CC(=O)OC5)CC4)CC3)CC2)C1	Traditional Herbal Isolate=deacetylo-leandrin	-6.7
7086	O(C)[C@@H]1[C@@H](O)[C@H](C)O[C@H](O[C@@H]2C[C@H]3[C@@](C)([C@@H]4[C@H]([C@]5(O)[C@](C)([C@@H]([C@@H](O)C5)C5=CC(=O)OC5)CC4)CC3)CC2)C1	Traditional Herbal Isolate=deacetylo-leandrin	-6.7
7103	O([C@@H]1O[C@@H](C)[C@H](O)[C@H](O)C1)[C@@H]1C[C@]2(O)[C@@](CO)([C@@H]3[C@@H]([C@]4(O)[C@@](C)([C@@H](C5=CC(=O)OC5)CC4)CC3)CC2)CC1	Traditional Herbal Isolate=helveticosol	-6.7
7144	O=C(CO)[C@]1(O)C[C@@H](O[C@@H]2O[C@H](C)[C@@H](O)[C@H]([N+H3])C2)c2c([O-])c3C(=O)c4c(OC)cccc4C(=O)c3c([O-])c2C1	Indian Approved Name=epirubicin FDA Approved Drug=EPIRUBICIN HYDROCHLORIDE	-6.7
7154	S(=O)(=O)(N(C[C@@H](O)[C@H](NC(=O)O[C@@H]1[C@H]2[C@@H](OC1)OCC2)Cc1ccccc1)CC(C)C)c1ccc(N)cc1	FDA Approved Drug=DARUNAVIR ETHANOLATE	-6.7
7172	O=C[C@]12[C@H]3[C@@H](O)C[C@@]4(C)[C@H](C5=CC(=O)OC5)CC[C@]4(O)[C@@H]3CC[C@H]1C[C@@H](O[C@H]1O[C@H](C)[C@H](O)[C@@H](OC)C1)CC2	Traditional Herbal Isolate=sinoside	-6.7
7178	O=C[C@]12[C@H]3[C@@H](O)C[C@@]4(C)[C@H](C5=CC(=O)OC5)CC[C@]4(O)[C@H]3CC[C@H]1C[C@@H](O[C@H]1O[C@H](C)[C@H](O)[C@H](OC)C1)CC2	Traditional Herbal Isolate=sinoside	-6.7
7183	O=C[C@]12[C@@H]3[C@@H](O)C[C@@]4(C)[C@H](C5=CC(=O)OC5)CC[C@]4(O)[C@H]3CC[C@H]1C[C@@H](O[C@H]1O[C@@H](C)[C@H](O)[C@@H](OC)C1)CC2	Traditional Herbal Isolate=sinoside	-6.7
7202	O(C)[C@@H]1[C@@H](O)[C@@H](C)O[C@@H](O[C@H]2C[C@H]3[C@](C)([C@@H]4[C@@H](O)C(=O)[C@@]5(C)[C@H](C6=CC(=O)OC6)CC[C@@]5(O)[C@@H]4CC3)CC2)C1	Traditional Herbal Isolate=sinostroside	-6.7
7216	O(C)c1c(OC)ccc(C[C@H]2[C@H](Cc3cc(OC)c4O[C@@H]([C@@H](CO)c4c3)c3cc(OC)c(O)cc3)C(=O)OC2)c1	Traditional Herbal Isolate=lappaol	-6.7
7227	O=C[C@]12[C@@](O)(C[C@@H](O[C@H]3[C@@H](O)[C@@H](O)[C@@H](O)[C@H](C)O3)CC1)CC[C@@H]1[C@]3(O)[C@@](C)([C@H](C4=CC(=O)OC4)CC3)CC[C@@H]21	Traditional Herbal Isolate=strophalloside	-6.7
7241	O([C@@H]1[C@H](O)[C@H](O)[C@@H](O)[C@@H](C)O1)[C@@H]1C[C@]2(O)[C@@](CO)([C@@H]3[C@@H]([C@]4(O)[C@@](C)([C@H](C5=CC(=O)OC5)CC4)CC3)CC2)CC1	Traditional Herbal Isolate=convallatoxol	-6.7
7246	O([C@@H]1[C@@H](O)[C@@H](O)[C@@H](O)[C@H](C)O1)[C@@H]1C[C@]2(O)[C@@](CO)([C@H]3[C@@H]([C@]4(O)[C@@](C)([C@H](C5=CC(=O)OC5)CC4)CC3)CC2)CC1	Traditional Herbal Isolate=convallatoxol	-6.7
7253	O([C@@H]1[C@H](O)[C@H](O)[C@@H](O)[C@H](C)O1)[C@@H]1C[C@]2(O)[C@@](CO)([C@H]3[C@H]([C@]4(O)[C@@](C)([C@H](C5=CC(=O)OC5)CC4)CC3)CC2)CC1	Traditional Herbal Isolate=convallatoxol	-6.7
7288	O[C@@H]1CC(C)(C)C(/C=C/C(=C\C=C\C(=C/C=C/C=C(\C=C\C=C(/C=C\C=2C(C)(C)CCCC=2C)\C)/C)\C)/C)=C(C)C1	Traditional Herbal Isolate=physoxanthin	-6.7
7300	S(=O)(=O)([O-])c1c(O)c(/C(/c2ccc(N(C)C)cc2)=C\2/C=C/C(=[N+](/C)\C)/C=C/2)c2c(c1)cc(S(=O)(=O)[O-])cc2	NPC Approved Name=green 5	-6.7
7318	O=C([C@@](O)(C)[C@H]1[C@H](O)C[C@@]2(C)[C@]1(C)CC(=O)[C@]1(C)[C@@H]2CC=C2C(C)(C)[C@@H](O)C(=O)C[C@@H]12)/C=C/C(OC(=O)C)(C)C	Traditional Herbal Isolate=iso-cucurbitacin b	-6.7
7367	O=C[C@]12[C@@](O)(C[C@@H](O[C@H]3[C@H](O)[C@H](O)[C@@H](O)[C@H](C)O3)CC1)CC[C@H]1[C@]3(O)[C@@](C)([C@H](O)C[C@H]21)[C@H](C1=CC(=O)OC1)CC3	Traditional Herbal Isolate=alpha-antiarin	-6.7
7369	O=C[C@]12[C@@](O)(C[C@@H](O[C@H]3[C@H](O)[C@@H](O)[C@@H](O)[C@H](C)O3)CC1)CC[C@H]1[C@]3(O)[C@@](C)([C@H](O)C[C@H]21)[C@H](C1=CC(=O)OC1)CC3	Traditional Herbal Isolate=alpha-antiarin	-6.7
7371	O=C[C@]12[C@@](O)(C[C@@H](O[C@H]3[C@@H](O)[C@H](O)[C@@H](O)[C@H](C)O3)CC1)CC[C@H]1[C@]3(O)[C@@](C)([C@H](O)C[C@H]21)[C@H](C1=CC(=O)OC1)CC3	Traditional Herbal Isolate=alpha-antiarin	-6.7
7384	O(C(C)(C)[C@H]1Oc2c(cc3c(OC(=O)C=C3)c2)C1)[C@H]1[C@@H](O)[C@H](O)[C@H](O[C@@H]2[C@@H](O)[C@H](O)[C@H](O)[C@H](CO)O2)[C@H](CO)O1	Traditional Herbal Isolate=decuroside	-6.7
7412	O=C(O[C@H]1[C@@]2(O)O[C@H]3[C@H](O[C@@H]2O[C@H](C)C1)C[C@H]1[C@@](C=O)([C@H]2[C@@H]([C@@]4(O)[C@](C)([C@H](C5=CC(=O)OC5)CC4)CC2)CC1)C3)C	Traditional Herbal Isolate=asclepiadin;asclepin	-6.7
7419	O=C(O[C@@H]1[C@]2(O)O[C@H]3[C@H](O[C@@H]2O[C@@H](C)C1)C[C@H]1[C@@](C=O)([C@@H]2[C@@H]([C@]4(O)[C@](C)([C@H](C5=CC(=O)OC5)CC4)CC2)CC1)C3)C	Traditional Herbal Isolate=asclepiadin;asclepin	-6.7
7462	O=C(N[C@]1(C(C)C)C(=O)N2[C@@H](CC(C)C)C(=O)N3[C@@H]([C@@]2(O)O1)CCC3)[C@@H]1C[N+@@H](C)[C@H]2[C@@H](c3c4c([nH]cc4C2)ccc3)C1	NPC Approved Name=dihydro-alpha-ergocryptine	-6.7
7471	O=C(N[C@@]1(C(C)C)C(=O)N2[C@H]([C@H](CC)C)C(=O)N3[C@H]([C@]2(O)O1)CCC3)[C@H]1C[N+@H](C)[C@@H]2[C@H](c3c4c([nH]cc4C2)ccc3)C1	NPC Approved Name=epicriptine	-6.7
7472	O=C(N[C@@]1(C(C)C)C(=O)N2[C@H]([C@@H](CC)C)C(=O)N3[C@H]([C@]2(O)O1)CCC3)[C@H]1C[N+@H](C)[C@@H]2[C@H](c3c4c([nH]cc4C2)ccc3)C1	NPC Approved Name=epicriptine	-6.7
7473	O=C(N[C@@]1(C(C)C)C(=O)N2[C@H]([C@H](CC)C)C(=O)N3[C@H]([C@]2(O)O1)CCC3)[C@H]1C[N+@@H](C)[C@@H]2[C@H](c3c4c([nH]cc4C2)ccc3)C1	NPC Approved Name=epicriptine	-6.7
7474	O=C(N[C@@]1(C(C)C)C(=O)N2[C@H]([C@@H](CC)C)C(=O)N3[C@H]([C@]2(O)O1)CCC3)[C@H]1C[N+@@H](C)[C@@H]2[C@H](c3c4c([nH]cc4C2)ccc3)C1	NPC Approved Name=epicriptine	-6.7
7476	O=C(OC)[C@@H]1[C@H](OC)[C@H](OC(=O)c2cc(OC)c(OC)c(OC)c2)C[C@H]2[C@@H]1C[C@H]1[N+H](C2)CCc2c3c([nH]c12)cccc3	China Approved Name=aescin FDA Approved Drug=DESERPIDINE	-6.7
7483	O(C)c1c(O)c2Oc3c(OC)cc4c([C@@H]([N+H2]CC4)Cc4cc(c(O)cc4)Oc4ccc(cc4)C[C@@H]4[N+@@H](C)CCc(c24)c1)c3	Traditional Herbal Isolate=trilobamine	-6.7
7519	O[C@@H]1C=C(C)[C@H](/C=C/C(=C/C=C\C(=C/C=C/C=C(\C=C/C=C(/C=C/[C@@]23C(C)(C)C[C@@H](O)C[C@@]2(C)O3)\C)/C)\C)/C)C(C)(C)C1	Traditional Herbal Isolate=taraxanthin	-6.7
7557	O([C@@H]1[C@H](O)[C@H](Oc2c(OC)c([O-])c3C(=O)C=C(c4ccccc4)Oc3c2)O[C@H](C)[C@H]1O)[C@H]1[C@@H](O)[C@H](O)[C@H](O)[C@@H](CO)O1	Traditional Herbal Isolate=7-methoxy-baicalein	-6.7
7565	O([C@@H]1[C@H](O)[C@H](Oc2c(OC)c([O-])c3C(=O)C=C(c4ccccc4)Oc3c2)O[C@H](C)[C@H]1O)[C@H]1[C@@H](O)[C@H](O)[C@H](O)[C@H](CO)O1	Traditional Herbal Isolate=7-methoxy-baicalein	-6.7
7569	O([C@@H]1[C@H](O)[C@H](Oc2c(OC)c([O-])c3C(=O)C=C(c4ccccc4)Oc3c2)O[C@H](C)[C@H]1O)[C@H]1[C@H](O)[C@H](O)[C@H](O)[C@H](CO)O1	Traditional Herbal Isolate=7-methoxy-baicalein	-6.7
7584	O=C(N[C@]1(C(C)C)C(=O)N2[C@H](C(CC)(C)C)C(=O)N3[C@H]([C@]2(O)O1)CCC3)[C@H]1C[N+@@H](C)[C@H]2[C@H](c3c4c([nH]cc4C2)ccc3)C1	FDA Approved Drug=ERGOLOID MESYLATES	-6.7
7586	O=C(N[C@@]1(C(C)C)C(=O)N2[C@@H](C(CC)(C)C)C(=O)N3[C@@H]([C@]2(O)O1)CCC3)[C@H]1C[N+@H](C)[C@@H]2[C@@H](c3c4c([nH]cc4C2)ccc3)C1	FDA Approved Drug=ERGOLOID MESYLATES	-6.7
7603	O(C[C@@H]1[C@@H](O)[C@@H](O)[C@H](O)[C@H](OC2=C(c3ccc(O)cc3)Oc3c(c([O-])cc(O)c3)C2=O)O1)[C@H]1[C@@H](O)[C@@H](O)[C@H](O)[C@H](C)O1	Traditional Herbal Isolate=kaempferol-3-robinobioside	-6.7
7604	O(C[C@H]1[C@@H](O)[C@@H](O)[C@H](O)[C@H](OC2=C(c3ccc(O)cc3)Oc3c(c([O-])cc(O)c3)C2=O)O1)[C@H]1[C@H](O)[C@@H](O)[C@H](O)[C@@H](C)O1	Traditional Herbal Isolate=kaempferol-3-robinobioside	-6.7
7607	O(C[C@@H]1[C@@H](O)[C@H](O)[C@H](O)[C@H](OC2=C(c3ccc(O)cc3)Oc3c(c([O-])cc(O)c3)C2=O)O1)[C@H]1[C@H](O)[C@@H](O)[C@H](O)[C@H](C)O1	Traditional Herbal Isolate=kaempferol-3-robinobioside	-6.7
7635	O([C@H]1[C@H](O)[C@H](O)[C@@H](O)[C@@H](C)O1)c1cc(O)c2c(O[C@H](c3ccc(O)cc3)[C@](O[C@H]3[C@@H](O)[C@H](O)[C@@H](O)[C@H](CO)O3)(O)C2)c1	Traditional Herbal Isolate=kaempferol-rhamno glucoside;physcim-l-gluco-rhamnoside	-6.7
7644	O(C([C@@H](O)Cc1c(OC)cc(OC)c2c1OC(=O)C=C2)(C)C)[C@@H]1[C@H](O)[C@H](O)[C@@H](O)[C@H](CO[C@@H]2[C@@H](O)[C@@](O)(CO)CO2)O1	Traditional Herbal Isolate=rubricauloside	-6.7
7663	O([C@H](C)[C@@]1(O)[C@]2(C)[C@@H](OC(=O)c3ccccc3)C[C@H]3[C@](O)([C@@H](O)C=C4[C@]3(C)CC[C@@H](O)C4)[C@@]2(O)CC1)C(=O)c1ccccc1	Traditional Herbal Isolate=dibenzoylgagaimol	-6.7
7685	Clc1c(OC)cc2cc1N(C)C(=O)C[C@@H](OC(=O)C)[C@@]1(C)O[C@@H]1[C@H](C)C1OC(=O)NC(O)([C@H](OC)/C=C/C=C(/C)\C2)C1	Traditional Herbal Isolate=maytanacine	-6.7
7695	O(C)c1c([C@H]2[C@@H](O)[C@@H](O)[C@H](O)[C@@H](CO)O2)c([O-])c2C(=O)C=C(c3ccc(O[C@H]4[C@@H](O)[C@H](O)[C@H](O)[C@H](CO)O4)cc3)Oc2c1	Traditional Herbal Isolate=flavocommelitin	-6.7
7704	O(C)c1c([C@H]2[C@H](O)[C@@H](O)[C@H](O)[C@@H](CO)O2)c([O-])c2C(=O)C=C(c3ccc(O[C@H]4[C@@H](O)[C@@H](O)[C@H](O)[C@@H](CO)O4)cc3)Oc2c1	Traditional Herbal Isolate=flavocommelitin	-6.7
7745	O(C)c1c(O)c2Oc3ccc(cc3)C[C@@H]3[N+@H](C)CCc4c3cc(c(OC)c4)Oc3c(OC)ccc(c3)C[C@H]3[N+@@H](C)CCc(c23)c1	Traditional Herbal Isolate=hayatinine	-6.7
7747	O(C)c1c(O)c2Oc3ccc(cc3)C[C@H]3[N+@H](C)CCc4c3cc(c(OC)c4)Oc3c(OC)ccc(c3)C[C@H]3[N+@@H](C)CCc(c23)c1	Traditional Herbal Isolate=hayatinine	-6.7
7748	O(C)c1c(O)c2Oc3ccc(cc3)C[C@H]3[N+@@H](C)CCc4c3cc(c(OC)c4)Oc3c(OC)ccc(c3)C[C@H]3[N+@@H](C)CCc(c23)c1	Traditional Herbal Isolate=hayatinine	-6.7
7751	O(C)c1c(O)c2Oc3ccc(cc3)C[C@H]3[N+@H](C)CCc4c3cc(c(OC)c4)Oc3c(OC)ccc(c3)C[C@H]3[N+@H](C)CCc(c23)c1	Traditional Herbal Isolate=hayatinine	-6.7
7765	O(C)c1c(O)c2Oc3ccc(cc3)C[C@H]3[N+@H](C)CCc4c3cc(c(OC)c4)Oc3c(OC)ccc(c3)C[C@H]3[N+@H](C)CCc(c23)c1	Traditional Herbal Isolate=hayatidine	-6.7
7804	O(C)c1c(OC)cc2c([C@@H](Cc3ccc(Oc4c(O)ccc(C[C@@H]5[N+@@H](C)CCc6c5cc(OC)c(O)c6)c4)cc3)[N+@@H](C)CC2)c1	Traditional Herbal Isolate=dauricinoline	-6.7
7863	O(C)c1c(OC)cc2c3[C@@H]([N+@H](C)CC2)Cc2cc(c(OC)cc2)Oc2ccc(cc2)C[C@@H]2[N+@H](C)CCc4c2cc(c(OC)c4)Oc13	Traditional Herbal Isolate=tetrandrine	-6.7
7867	O(C)c1c(OC)cc2c3[C@@H]([N+@H](C)CC2)Cc2cc(c(OC)cc2)Oc2ccc(cc2)C[C@@H]2[N+@@H](C)CCc4c2cc(c(OC)c4)Oc13	Traditional Herbal Isolate=tetrandrine	-6.7
7951	S(CC1=C(C(=O)[O-])N2C(=O)[C@H](NC(=O)[C@@H](NC(=O)N3C(=O)C(=O)N(CC)CC3)c3ccc(O)cc3)[C@H]2SC1)c1n(C)nnn1	China Approved Name=cefoperazone Indian Approved Name=cefoperazone	-6.7
7989	Brc1[nH]c2c3c(ccc2)C=2[C@@H]([N+@H](C)C[C@H](C(=O)N[C@@]4(C(C)C)C(=O)N5[C@H](CC(C)C)C(=O)N6[C@H]([C@]5(O)O4)CCC6)C=2)Cc13	China Approved Name=bromocriptine Indian Approved Name=bromocriptine FDA Approved Drug=BROMOCRIPTINE MESYLATE	-6.7
8047	O(C)c1c(OC)cc2[C@@H]3[N+@H](C)CCc2c1Oc1c2OCOc2c(OC)c2c1[C@H]([N+@@H](C)CC2)Cc1ccc(Oc2c(OC)ccc(c2)C3)cc1	Traditional Herbal Isolate=thalphinine	-6.7
8062	O=C1[C@@H]([C@H](O)CCCCC)[C@@H](O)C[C@H](O)C[C@@H](O)C[C@@H](O)C[C@@H](O)C[C@H](O)[C@H](O)[C@@H](O)/C(/C)=C\C=C\C=C\C=C\C=C\[C@@H](O)[C@@H](C)O1	NPC Approved Name=fungichromin	-6.7
8070	O=C(N/C=C\1/C(=O)N[C@H]([C@H]2NC(N)=[N+H]CC2)C(=O)NC[C@@H]([N+H3])C(=O)N[C@@H](CO)C(=O)N[C@@H](CNC(=O)C[C@@H]([N+H3])CCC[N+H3])C(=O)N/1)N	WHO Essential Medicine=capreomycin Indian Approved Name=capreomycin FDA Approved Drug=CAPREOMYCIN SULFATE	-6.7
8116	O(C[C@@H]1[C@H](O)[C@H](OC)[C@@H](O)[C@H](O[C@@H]2C[C@]3(O)[C@@](C)([C@H]4[C@H]([C@]5(O)[C@@](C)([C@H](C6=CC(=O)OC6)CC5)CC4)CC3)CC2)O1)[C@@H]1[C@H](C)O[C@H](O)C[C@@H]1O	Traditional Herbal Isolate=periplocin	-6.7
8128	O(C[C@H]1[C@H](O)[C@H](O)[C@H](O)[C@H](O[C@@H]2C[C@]3(O)[C@@](CO)([C@H]4[C@@H]([C@]5(O)[C@@](C)([C@H](C6=CC(=O)OC6)CC5)CC4)CC3)CC2)O1)[C@@H]1[C@H](C)O[C@H](O)C[C@@H]1O	Traditional Herbal Isolate=erysimosol	-6.7
8272	O=C([O-])[C@]12[C@@H](C=3[C@](C)([C@@]4(C)[C@@H]([C@@]5(C)[C@H]([C@](CO)(C)[C@@H](O[C@H]6[C@H](O[C@H]7[C@H](O)[C@H](O)[C@H](O)[C@@H](C)O7)[C@H](O)[C@H](O)CO6)CC5)CC4)CC=3)CC1)CC(C)(C)CC2	Traditional Herbal Isolate=dianthus saponin;hederin;saponin akebin	-6.7
8287	P(=O)(OP(=O)(OP(=O)(OC[C@H]1[C@@H](O)C[C@@H](N2C(=O)N=C(N)C=C2)O1)[O-])[O-])(OP(=O)(OC[C@H]1[C@H](O)[C@@H](O)[C@H](N2C(=O)NC(=O)C=C2)O1)[O-])[O-]	NPC Approved Name=denufosol [inn]	-6.7
8292	P(=O)(OP(=O)(OP(=O)(OC[C@H]1[C@@H](O)C[C@@H](N2C(=O)N=C(N)C=C2)O1)[O-])[O-])(OP(=O)(OC[C@H]1[C@H](O)[C@@H](O)[C@H](N2C(=O)NC(=O)C=C2)O1)[O-])[O-]	NPC Approved Name=denufosol [inn]	-6.7
8293	P(=O)(OP(=O)(OP(=O)(OC[C@H]1[C@@H](O)C[C@@H](N2C(=O)N=C(N)C=C2)O1)[O-])[O-])(OP(=O)(OC[C@H]1[C@H](O)[C@@H](O)[C@H](N2C(=O)NC(=O)C=C2)O1)[O-])[O-]	NPC Approved Name=denufosol [inn]	-6.7
8296	P(=O)(OP(=O)(OP(=O)(OC[C@H]1[C@@H](O)C[C@@H](N2C(=O)N=C(N)C=C2)O1)[O-])[O-])(OP(=O)(OC[C@H]1[C@H](O)[C@@H](O)[C@H](N2C(=O)NC(=O)C=C2)O1)[O-])[O-]	NPC Approved Name=denufosol [inn]	-6.7
8315	O=C(N[C@H]1[C@@H](O[C@@H]2[C@@H](O)[C@H](O)[C@H](O)[C@@H](C(=O)[O-])O2)[C@H](O)[C@H](CO)O[C@H]1O[C@@H]1[C@@H](O)[C@H](O)[C@H](O[C@H]2[C@H](O)[C@H](CO)O[C@H](O)[C@@H]2NC(=O)C)O[C@H]1C(=O)[O-])C	Indian Approved Name=hyaluronic acid	-6.7
8332	O=C([O-])[C@@]12[C@H](C=3[C@@](C)([C@]4(C)[C@H]([C@]5(C)[C@H](C(C)(C)[C@@H](O[C@@H]6[C@@H](O)[C@@H](O[C@@H]7[C@@H](O)[C@@H](O)[C@@H](O)[C@@H](CO)O7)[C@@H](O)[C@@H](CO)O6)CC5)CC4)CC=3)CC1)CC(C)(C)CC2	Traditional Herbal Isolate=randianin	-6.7
8338	O([C@H]1[C@@H](O)[C@@H](O)[C@@H](O)[C@H](CO)O1)[C@H]1[C@H]([C@@H](CC/C=C(\C)/C)C)[C@]2(C)[C@](C)([C@@H]3[C@]4([C@@]5(C(C(C)(C)[C@@H](O[C@@H]6[C@H](O)[C@@H](O)[C@@H](O)[C@H](CO)O6)CC5)C(=O)C3)C4)CC2)C1	Traditional Herbal Isolate=diadzin-4 7-diglucoside	-6.7
8354	P(=O)(OP(=O)(OC[C@H]1[C@H](O)[C@@H](O)[C@@H](n2c3ncnc(N)c3nc2)O1)[O-])(OC[C@H](O)[C@@H](O)[C@@H](O)CN1c2c(N=C3C(=O)NC(=O)N=C13)cc(C)c(C)c2)[O-]	NPC Approved Name=flavitan	-6.7
8453	O(C)[C@H]1[C@H](O)[C@H](O[C@@H]2[C@@H](C)O[C@@H](O[C@H]3[C@H](C)O[C@H](O[C@@H]4C[C@@H]5[C@@](C)([C@H]6[C@](O)([C@@]7(O)[C@](C)([C@H](O)C6)[C@@](O)([C@@H](O)C)CC7)CC5)CC4)C[C@H]3OC)C[C@@H]2OC)O[C@@H](C)[C@H]1O	Traditional Herbal Isolate=tenacissoside a	-6.7
8461	O(C)[C@@H]1[C@H](O)[C@@H](O[C@@H]2[C@@H](C)O[C@H](O[C@H]3[C@@H](C)O[C@H](O[C@@H]4C[C@@H]5[C@@](C)([C@H]6[C@](O)([C@@]7(O)[C@](C)([C@H](O)C6)[C@@](O)([C@@H](O)C)CC7)CC5)CC4)C[C@H]3OC)C[C@@H]2OC)O[C@@H](C)[C@H]1O	Traditional Herbal Isolate=tenacissoside a	-6.7
8479	O=C(O[C@@H]1[C@H](O)[C@@H](O)[C@H](O)[C@H](CO)O1)[C@]1(C)[C@H](O)[C@H](O)C[C@@]2(C)[C@@H]3[C@](C)([C@]4(CO)C([C@@H]5[C@](C(=O)O[C@@H]6[C@H](O)[C@@H](O)[C@H](O)[C@@H](CO)O6)(CC4)CCC(C)(C)C5)=CC3)CC[C@@H]12	Traditional Herbal Isolate=prosapogenin	-6.7
8511	Clc1ccc(C(=O)n2c(C)c(CC(=O)OCC[N+H]3CCN(CCCOC(=O)CC[C@@H](NC(=O)c4ccccc4)C(=O)N(CCC)CCC)CC3)c3c2ccc(OC)c3)cc1	NPC Approved Name=proglumetacin	-6.7
8512	Clc1ccc(C(=O)n2c(C)c(CC(=O)OCC[N+H]3CCN(CCCOC(=O)CC[C@H](NC(=O)c4ccccc4)C(=O)N(CCC)CCC)CC3)c3c2ccc(OC)c3)cc1	NPC Approved Name=proglumetacin	-6.7
8517	O=C([O-])c1cc([O-])c2C(=O)c3c(O[C@H]4[C@@H](O)[C@H](O)[C@H](O)[C@H](CO)O4)cccc3[C@H]([C@H]3c4c(c([O-])cc(C(=O)[O-])c4)C(=O)c4c(O[C@H]5[C@@H](O)[C@H](O)[C@H](O)[C@H](CO)O5)cccc34)c2c1	WHO Essential Medicine=senna	-6.7
8535	O([C@@H]1[C@H](O[C@H]2[C@@H](O)[C@@H](O)[C@H](O)[C@@H](C)O2)[C@@H](O[C@H]2CC=3[C@@](C)([C@H]4[C@@H]([C@H]5[C@@](C)([C@@H]6[C@@H](C)[C@@H]7[N+H]([C@H]6C5)C[C@@H](C)CC7)CC4)CC=3)CC2)O[C@@H](CO)[C@H]1O)[C@@H]1[C@@H](O)[C@H](O)[C@H](O)[C@H](CO)O1	Traditional Herbal Isolate=solanine	-6.7
8597	O=C([O-])[C@@H]1[C@H](O[C@H]2[C@@H](O)[C@@H](O)[C@@H](CO)O2)[C@@H](O)[C@H](O)[C@@H](O[C@H]2C(C)(C)[C@@H]3[C@@](C)([C@@H]4[C@](C)([C@@]5(C)C([C@H]6[C@@](C(=O)O[C@H]7[C@@H](O)[C@H](O)[C@H](O)[C@H](CO)O7)(CC5)CCC(C)(C)C6)=CC4)CC3)CC2)O1	Traditional Herbal Isolate=araloside a	-6.7
8607	O=C([O-])[C@H]1[C@H](O)C[C@H](O[C@H]2[C@@H](O)[C@@H]([N+H3])[C@@H](O)[C@H](C)O2)/C=C/C=C/C=C/C=C/CC/C=C/C=C/[C@@H](C)[C@@H](O)[C@H](C)[C@H](C)OC(=O)C[C@@H](O)C[C@H](O)C[C@H](O)CC[C@H](O)[C@H](O)CC(=O)C[C@H]1O	China Approved Name=nystatin;Nystatin WHO Essential Medicine=nystatin Australia Approved Name=NYSTATIN FDA Approved Drug=NYSTATIN	-6.7
8613	O=C([O-])[C@@H]1[C@H](O)C[C@H](O[C@@H]2[C@@H](O)[C@@H]([N+H3])[C@@H](O)[C@H](C)O2)/C=C/C=C/C=C/C=C/CC/C=C/C=C/[C@H](C)[C@H](O)[C@H](C)[C@@H](C)OC(=O)C[C@H](O)C[C@@H](O)C[C@@H](O)CC[C@@H](O)[C@H](O)CC(=O)C[C@@H]1O	China Approved Name=nystatin;Nystatin WHO Essential Medicine=nystatin Australia Approved Name=NYSTATIN FDA Approved Drug=NYSTATIN	-6.7
8649	O=C([O-])[C@@H]1[C@H](O)[C@@H](O)[C@H](O[C@H]2[C@@H](O)[C@H](O)[C@H](O)[C@H](CO)O2)[C@H](O[C@@H]2C(C)(C)[C@@H]3[C@@](C)([C@H]4[C@](C)([C@@]5(C)C([C@H]6[C@@](C(=O)O[C@H]7[C@@H](O)[C@H](O)[C@H](O)[C@H](CO)O7)(CC5)CCC(C)(C)C6)=CC4)CC3)CC2)O1	Traditional Herbal Isolate=ginsenoside ro	-6.7
8666	O=C(O[C@@H]1[C@@H](O)[C@H](O)[C@H](O)[C@@H](CO[C@H]2[C@@H](O)[C@H](O)[C@@H](O[C@@H]3[C@@H](O)[C@@H](O)[C@H](O)[C@H](C)O3)[C@@H](CO)O2)O1)[C@]12[C@@H]([C@@H](C)[C@@H](C)CC1)C=1[C@](C)([C@@]3(C)[C@@H]([C@]4(C)[C@H]([C@H](O)C3)[C@@](CO)(C)[C@@H](O)[C@H](O)C4)CC=1)CC2	Traditional Herbal Isolate=madecassoside	-6.7
8669	O=C(O[C@H]1[C@@H](O)[C@@H](O)[C@@H](O)[C@@H](CO[C@H]2[C@@H](O)[C@@H](O)[C@@H](O[C@H]3[C@H](O)[C@@H](O)[C@H](O)[C@@H](C)O3)[C@@H](CO)O2)O1)[C@]12[C@H]([C@@H](C)[C@@H](C)CC1)C=1[C@](C)([C@@]3(C)[C@H]([C@]4(C)[C@@H]([C@@H](O)C3)[C@@](CO)(C)[C@@H](O)[C@@H](O)C4)CC=1)CC2	Traditional Herbal Isolate=madecassoside	-6.7
8698	O=C(NCC(=O)N)[C@@H](NC(=O)[C@H]1N(C(=O)[C@@H]2NC(=O)[C@H](CC(=O)N)NC(=O)[C@@H]([C@H](O)C)NC(=O)[C@H]([C@H](CC)C)NC(=O)[C@H](Cc3ccc(O)cc3)NC(=O)[C@@H]([N+H3])CSSC2)CCC1)CC(C)C	Indian Approved Name=urofollitrophin FDA Approved Drug=UROFOLLITROPIN	-6.7
8767	O=C(NCC(=O)N)[C@@H](NC(=O)[C@H]1N(C(=O)[C@H]2NC(=O)[C@@H](CC(=O)N)NC(=O)[C@H](CCC(=O)N)NC(=O)[C@H](Cc3ccccc3)NC(=O)[C@@H](Cc3ccc(O)cc3)NC(=O)[C@H]([N+H3])CSSC2)CCC1)CCCC[N+H3]	FDA Approved Drug=LYPRESSIN	-6.7
8773	O=C(NCC(=O)N)[C@H](NC(=O)[C@H]1N(C(=O)[C@@H]2NC(=O)[C@H](CC(=O)N)NC(=O)[C@@H](CCC(=O)N)NC(=O)[C@H](Cc3ccccc3)NC(=O)[C@@H](Cc3ccc(O)cc3)NC(=O)[C@@H]([N+H3])CSSC2)CCC1)CCCC[N+H3]	FDA Approved Drug=LYPRESSIN	-6.7
8847	S(=O)(=O)(Oc1ccc(C[C@H](NC(=O)[C@H]([N+H3])CC(=O)[O-])C(=O)N[C@@H](C(=O)NCC(=O)N[C@@H](C(=O)N[C@H](C(=O)N[C@H](C(=O)N[C@@H](C(=O)N)Cc2ccccc2)CC(=O)[O-])CCSC)Cc2c3c([nH]c2)cccc3)CCSC)cc1)[O-]	NPC Approved Name=sincalide	-6.7
8869	O([C@H](C)c1c(C)[cH0]=2[nH][cH0]1=Cc1c(C)c([C@@H](O)C)c([nH]1)C=C1C(C)=C(CCC(=O)[O-])C(=N1)C=C1C(CCC(=O)[O-])=C(C)C(=N1)C=2)[C@H](C)c1c(C)[cH0]=2[nH][cH0]1=CC=1C(C)=C(CCC(=O)[O-])C(N=1)=CC=1C(CCC(=O)[O-])=C(C)C(N=1)=Cc1c(C)c([C@H](O)C)c([nH]1)C=2	FDA Approved Drug=PORFIMER SODIUM	-6.7
8950	O=C(NNC(=O)[C@@H]1N(C(=O)[C@@H](NC(=O)[C@H](NC(=O)[C@@H](NC(=O)[C@H](NC(=O)[C@@H](NC(=O)[C@@H](NC(=O)[C@@H](NC(=O)[C@H]2NC(=O)CC2)Cc2[nH]cnc2)Cc2c3c([nH]c2)cccc3)CO)Cc2ccc(O)cc2)COC(C)(C)C)CC(C)C)CCC/[N+H]=C(\N)/N)CCC1)N	FDA Approved Drug=GOSERELIN ACETATE	-6.7
8954	O=C(NNC(=O)[C@@H]1N(C(=O)[C@H](NC(=O)[C@H](NC(=O)[C@@H](NC(=O)[C@@H](NC(=O)[C@@H](NC(=O)[C@H](NC(=O)[C@@H](NC(=O)[C@H]2NC(=O)CC2)Cc2[nH]cnc2)Cc2c3c([nH]c2)cccc3)CO)Cc2ccc(O)cc2)COC(C)(C)C)CC(C)C)CCC/[N+H]=C(\N)/N)CCC1)N	FDA Approved Drug=GOSERELIN ACETATE	-6.7
8955	O=C(NNC(=O)[C@H]1N(C(=O)[C@@H](NC(=O)[C@H](NC(=O)[C@@H](NC(=O)[C@H](NC(=O)[C@H](NC(=O)[C@H](NC(=O)[C@@H](NC(=O)[C@H]2NC(=O)CC2)Cc2[nH]cnc2)Cc2c3c([nH]c2)cccc3)CO)Cc2ccc(O)cc2)COC(C)(C)C)CC(C)C)CCC/[N+H]=C(\N)/N)CCC1)N	FDA Approved Drug=GOSERELIN ACETATE	-6.7
9002	O=C(N[C@H](C(=O)N[C@@H](C(=O)N[C@@H](C(=O)N[C@@H](C(=O)N1[C@@H](C(=O)NCC(=O)N)CCC1)CCCNC(=[N+H2])N)CC(C)C)Cc1cc2c(cc1)cccc2)Cc1ccc(O)cc1)[C@H](NC(=O)[C@H](NC(=O)[C@H](NC(=O)[C@H]1NC(=O)CC1)Cc1nc[nH]c1)Cc1c2c([nH]c1)cccc2)CO	Indian Approved Name=nafarelin FDA Approved Drug=NAFARELIN ACETATE	-6.7
9102	O=C(O[C@@H]1[C@@H](C=O)OC(=O)c2c(c(O)c(O)c(O)c2)Oc2c(O)c(O)c3-c4c(O)c(O)c(O)cc4C(=O)O[C@H]4[C@@H](OC(=O)c5cc(O)c(O)c(O)c5)C([C@H](OC(=O)c5cc(O)c(O)c(O)c5)O[C@@H]4COC(=O)c3c2)OC(=O)c2c(c(O)c(O)c(O)c2)Oc2c(O)c(O)c3-c4c(O)c(O)c(O)cc4C(=O)OC[C@H](O)C1OC(=O)c3c2)c1cc(O)c(O)c(O)c1	Traditional Herbal Isolate=woodfordin a	-6.7
1886	O=C1O[C@H](c2ccc(O)cc2)Cc2c1c([O-])ccc2	Traditional Herbal Isolate=hydrangenol	-6.6
1930	O=C1[C@H](N2C(=O)c3c(C2=O)cccc3)CCC(=O)N1	Australia Approved Name=THALIDOMIDE FDA Approved Drug=THALIDOMIDE	-6.6
2112	O=C1C([O-])=C(c2ccccc2)Oc2c1c([O-])cc(O)c2	Traditional Herbal Isolate=galangin	-6.6
2156	O=C1c2c([O-])cc(O)cc2O[C@@H](c2ccc(O)cc2)C1	Traditional Herbal Isolate=naringenin-4â€²-o-pyranogluoside	-6.6
2335	Clc1c(C2CCCCC2)cc2c([C@@H](C(=O)[O-])CC2)c1	NPC Approved Name=clidanac	-6.6
2378	C[N+@H]1[C@H]2c3c(c4OCOc4cc3CC1)-c1c(cccc1)C2	Traditional Herbal Isolate=roemerine;roemerin	-6.6
2419	O(C)c1c(O)cc([O-])c2C(=O)C=C(c3ccccc3)Oc12	Traditional Herbal Isolate=wogonin	-6.6
2467	N#Cc1ccc(C(n2ncnc2)c2ccc(C#N)cc2)cc1	Indian Approved Name=letrozole Australia Approved Name=LETROZOLE FDA Approved Drug=LETROZOLE	-6.6
2659	O=C([O-])CCc1oc(c(-c2ccccc2)n1)-c1ccccc1	Indian Approved Name=oxaprozin FDA Approved Drug=OXAPROZIN;OXAPROZIN POTASSIUM	-6.6
2687	O([C@H]1[C@@H](O)C(=O)[C@H](O)[C@H](CO)O1)c1c2c([nH]c1)cccc2	Traditional Herbal Isolate=indoxyl-5-ketogluconate	-6.6
2688	O([C@@H]1[C@H](O)C(=O)[C@H](O)[C@H](CO)O1)c1c2c([nH]c1)cccc2	Traditional Herbal Isolate=indoxyl-5-ketogluconate	-6.6
2690	O([C@@H]1[C@@H](O)C(=O)[C@@H](O)[C@H](CO)O1)c1c2c([nH]c1)cccc2	Traditional Herbal Isolate=indoxyl-5-ketogluconate	-6.6
3036	O=C(N(C)C)Cc1c(-c2ccc(C)cc2)nc2n1C=C(C)C=C2	US Illegal/Scheduled Drug (Schedule 4)=Zolpidem Indian Approved Name=zolpidem FDA Approved Drug=ZOLPIDEM TARTRATE	-6.6
3077	Clc1cc([C@@H](n2cncc2)c2cc3[nH]cnc3cc2)ccc1	NPC Approved Name=liarozole	-6.6
3100	[C@H](n1cncc1)(c1ccc(-c2ccccc2)cc1)c1ccccc1	China Approved Name=bifonazole Indian Approved Name=bifonazole	-6.6
3150	O=C(N1CC(=O)N2[C@H](c3c(cccc3)CC2)C1)C1CCCCC1	China Approved Name=praziquantel WHO Essential Medicine=praziquantel Indian Approved Name=praziquantel FDA Approved Drug=PRAZIQUANTEL	-6.6
3165	O(C)c1ccc(CC[C@H]2OC(=O)c3c([O-])cc(O)cc3C2)cc1	Traditional Herbal Isolate=agrimonolide	-6.6
3227	O=C(OC(C)(C)[C@@H]1Oc2c(c3OC(=O)C=Cc3cc2)C1)C(C)C	Traditional Herbal Isolate=cnidiadin	-6.6
3255	O=C([O-])c1c(C(=O)c2cc(c(O)cc2)-c2ccccc2)cccc1	NPC Approved Name=cloperastine fendizoate	-6.6
3277	O=C1OC(c2ccc(O)cc2)(c2ccc(O)cc2)c2c1cccc2	Indian Approved Name=phenolphthalein	-6.6
3471	Clc1cc2C(c3c(F)cccc3)=NCc3n(c(C)[n+H]c3)-c2cc1	China Approved Name=midazolam WHO Essential Medicine=midazolam Indian Approved Name=midazolam US Illegal/Scheduled Drug (Schedule 4)=Midazolam FDA Approved Drug=MIDAZOLAM HYDROCHLORIDE	-6.6
3525	O[C@@]1(C)[C@@]2(C)[C@@H]([C@H]3[C@@H]([C@@]4(C)[C@H](Cc5[nH]ncc5C4)CC3)CC2)CC1	China Approved Name=Stanozolol Indian Approved Name=stanozolol FDA Approved Drug=STANOZOLOL	-6.6
3613	Cc1c2c(c[n+]3c1-c1c(cc4OCOc4c1)CC3)cc1OCOc1c2	Traditional Herbal Isolate=worenine	-6.6
3629	O=C1N2[C@H]3C([C@@H]4/C(=C\CO)/C[N+H]5[C@@H](C3(c3c2cccc3)CC5)C4)=CC1	Traditional Herbal Isolate=isostrychnine	-6.6
3674	O=C([O-])Cc1c(c(-c2ccc(OC)cc2)no1)-c1ccc(OC)cc1	NPC Approved Name=mofezolac	-6.6
3678	O(C/C=C(\CC/C=C(\C)/C)/C)c1c2c(occ2)cc2OC(=O)C=Cc12	Traditional Herbal Isolate=bergaptin	-6.6
3752	O=C1C=C2[C@H](C)C[C@@H]3[C@@H]4[C@](C)([C@](O)(C#CC)CC4)CC[C@@H]3[C@@]2(C)CC1	NPC Approved Name=dimethisterone	-6.6
3826	Oc1c2[C@@H]3OCC45[C@H]3[C@](C)(Oc2cc(C)c1)CCC4C(C)(C)CCC5	NPC Approved Name=siccanin	-6.6
3828	Clc1c(C2=NCc3n(c(C)nn3)-c3sc(CC)cc23)cccc1	Indian Approved Name=etizolam	-6.6
3829	Clc1c(C2=NCc3n(c(C)nn3)-c3c2cc(Cl)cc3)cccc1	US Illegal/Scheduled Drug (Schedule 4)=Triazolam FDA Approved Drug=TRIAZOLAM	-6.6
3844	O=C1O[C@@H](c2cocc2)C[C@@]2(C)[C@@H]1CC(=O)[C@H]1[C@H]3C(=O)OC(C3)C[C@@H]21	Traditional Herbal Isolate=diosbulbin	-6.6
3854	O=C1O[C@@H](c2cocc2)C[C@@]2(C)[C@H]1CC(=O)[C@@H]1[C@@H]3C(=O)OC(C3)C[C@@H]21	Traditional Herbal Isolate=diosbulbin	-6.6
3857	O=C1C(=C)C2CC31C(=O)O[C@@H]1C4([C@@H]5[C@@](C)(CO[C@@H]5OC4)CC1)C3CC2	Traditional Herbal Isolate=diterpenoids	-6.6
3873	O=C1O[C@@]2(C)OC34[C@H]5[C@@H]([C@]6(C)C(=CC5)C[C@H](O)CC6)CCC13[C@@H]2CC4	Traditional Herbal Isolate=adonilide	-6.6
3888	C([N+]1(C)CCCCC1)[C@@H]1O[C@@](c2ccccc2)(C2CCCCC2)OC1	NPC Approved Name=oxapium iodide	-6.6
3892	[N+H](C)(C)[C@H]1CC=2[C@@](C)([C@H]3[C@H]([C@@H]4[C@]5([C@H]([C@H](C)[N+H2]C5)CC4)CC3)CC=2)CC1	Traditional Herbal Isolate=conessimine	-6.6
3898	[N+H](C)(C)[C@H]1CC=2[C@@](C)([C@@H]3[C@H]([C@H]4[C@]5([C@H]([C@H](C)[N+H2]C5)CC4)CC3)CC=2)CC1	Traditional Herbal Isolate=conessimine	-6.6
3899	[N+H](C)(C)[C@H]1CC=2[C@@](C)([C@@H]3[C@H]([C@H]4[C@]5([C@H]([C@@H](C)[N+H2]C5)CC4)CC3)CC=2)CC1	Traditional Herbal Isolate=conessimine	-6.6
3906	[N+H](C)(C)[C@H]1CC=2[C@@](C)([C@@H]3[C@@H]([C@H]4[C@]5([C@H]([C@H](C)[N+H2]C5)CC4)CC3)CC=2)CC1	Traditional Herbal Isolate=conessimine	-6.6
4057	O=[N+]([O-])c1ccc([C@@H](CC(=O)C)C=2C(=O)Oc3c(C=2[O-])cccc3)cc1	Indian Approved Name=acenocoumarol	-6.6
4092	O=C(C)N1[C@H]2[C@H]3[C@@H](O)OCC=C4[C@@H]3C[C@H]3[N+H](C4)CCC23c2c1cccc2	Traditional Herbal Isolate=diaboline	-6.6
4105	O=C(Nc1c(CC[C@H]2[N+@H](C)CCCC2)cccc1)c1ccc(OC)cc1	NPC Approved Name=encainide	-6.6
4115	O=S1(=O)OC(c2ccc(O)cc2)(c2ccc(O)cc2)c2c1cccc2	NPC Approved Name=sulfonphthal	-6.6
4116	O=C1c2c(cc3OCOc3c2)CC[N+@H](C)Cc2c3OCOc3ccc2C1	Traditional Herbal Isolate=biflorine	-6.6
4176	Fc1ccc(C(=O)CCC[N+H]2CCC(O)(c3ccc(C)cc3)CC2)cc1	NPC Approved Name=moperone	-6.6
4197	O=C1[C@@]2(C(C)C)O[C@H]2[C@@H]2O[C@@]32[C@]2(C)[C@H](C4=C(C(=O)OC4)CC2)C[C@@H]2O[C@@]132	Traditional Herbal Isolate=triptonide	-6.6
4204	O[C@H]1[C@@H]2Oc3c(O)ccc4c3[C@@]32[C@](O)([C@H]([N+@H](CC2CCC2)CC3)C4)CC1	FDA Approved Drug=NALBUPHINE HYDROCHLORIDE	-6.6
4209	[N+H](C)(C)[C@H]1CC=2[C@@](C)([C@@H]3[C@@H]([C@@H]4[C@]5([C@H]([C@@H](C)[N+@H](C)C5)CC4)CC3)CC=2)CC1	Traditional Herbal Isolate=conessine;concuressine;conkurchine	-6.6
4247	O=C(O[C@H]1[C@@H](O)[C@H]2C(=C)C(=O)O[C@@H]2[C@H]2C(C)=CC(=O)[C@@H]2[C@H]1C)/C(=C\C)/C	Indian Approved Name=azardirachta indica	-6.6
4260	O=C(CO)[C@@]1(O)[C@@]2(C)[C@@H]([C@@H]3[C@@H]([C@@H](O)C2)[C@@]2(C)C(=CC(=O)C=C2)CC3)CC1	China Approved Name=prednisolone Indian Approved Name=prednisolone acet;prednisolone;methyl prednisolone aceponate WHO Essential Medicine=prednisolone Australia Approved Name=METHYLPREDNISOLONE ACETATE;PREDNISOLONE ACETATE;PREDNISOLONE SODIUM PHOSPHATE;PREDNISOLONE FDA Approved Drug=METHYLPREDNISOLONE ACETATE;PREDNISOLONE;PREDNISOLONE ACETATE;PREDNISOLONE SODIUM PHOSPHATE	-6.6
4314	O=C(C[N+@H]1[C@H]2[C@H]3C(c4c(ccc(O)c4)C2)(CC1)CCCC3)c1ccccc1	US Illegal/Scheduled Drug (Schedule 1)=Levophenacylmorphan	-6.6
4315	O=C(C[N+@@H]1[C@H]2[C@H]3C(c4c(ccc(O)c4)C2)(CC1)CCCC3)c1ccccc1	US Illegal/Scheduled Drug (Schedule 1)=Levophenacylmorphan	-6.6
4395	O=C(N[C@H]1C(=O)N2C(C(=O)[O-])=C(OC)CS[C@@H]12)[C@@H]([N+H3])C1=CCC=CC1	NPC Approved Name=cefroxadine	-6.6
4397	O(C)c1cc2c(N3C(=O)C[C@@H]4OCC=C5[C@@H]6[C@H]4[C@H]3C32[C@@H]([N+H](C5)CC3)C6)cc1	Traditional Herbal Isolate=beta- colubrine	-6.6
4401	O(C)c1cc2c(N3C(=O)C[C@@H]4OCC=C5[C@H]6[C@H]4[C@@H]3C32[C@H]([N+H](C5)CC3)C6)cc1	Traditional Herbal Isolate=beta- colubrine	-6.6
4404	O(C)c1cc2c(N3C(=O)C[C@H]4OCC=C5[C@H]6[C@H]4[C@H]3C32[C@@H]([N+H](C5)CC3)C6)cc1	Traditional Herbal Isolate=beta- colubrine	-6.6
4410	O(C)c1cc2c(N3C(=O)C[C@H]4OCC=C5[C@H]6[C@H]4[C@@H]3C32[C@H]([N+H](C5)CC3)C6)cc1	Traditional Herbal Isolate=beta- colubrine	-6.6
4419	O=[N+]([O-])c1c(OC)c2C(=O)c3c(N(C)c2c2c1OC(C)(C)C=C2)cccc3	Traditional Herbal Isolate=nitroacronycine	-6.6
4530	O=C(OC)C=1[C@@H]2[C@@H]([C@@H](C)OC=1)C[N+H]1[C@H](C3(C(=O)Nc4c3cccc4)CC1)C2	Traditional Herbal Isolate=uncarine f	-6.6
4548	O[C@@H]1O[C@@H]2[C@H]([N+@H](C)CCc3c2cc2OCOc2c3)c2c1c1OCOc1cc2	Traditional Herbal Isolate=rhoeagenine	-6.6
4554	O[C@H]1O[C@H]2[C@H]([N+@H](C)CCc3c2cc2OCOc2c3)c2c1c1OCOc1cc2	Traditional Herbal Isolate=rhoeagenine	-6.6
4561	O[C@H]1O[C@@H]2[C@@H]([N+@@H](C)CCc3c2cc2OCOc2c3)c2c1c1OCOc1cc2	Traditional Herbal Isolate=rhoeagenine	-6.6
4649	O(Cc1ccccc1)c1c2O[C@H]3[C@H](O)C=C[C@H]4[C@H]5[N+@H](C)CC[C@]34c2c(cc1)C5	US Illegal/Scheduled Drug (Schedule 1)=Benzylmorphine	-6.6
4654	O(C(c1ccccc1)c1ccccc1)CC[N+@@H]([C@H]([C@H](O)c1ccccc1)C)C	NPC Approved Name=difeterol	-6.6
4660	Clc1ccc(C2(O)CC[N+H](CCCC(=O)c3ccc(F)cc3)CC2)cc1	China Approved Name=haloperidol Indian Approved Name=haloperidol WHO Essential Medicine=haloperidol Australia Approved Name=HALOPERIDOL DECANOATE;HALOPERIDOL FDA Approved Drug=HALOPERIDOL;HALOPERIDOL DECANOATE;HALOPERIDOL LACTATE	-6.6
4698	Fc1ccc(C(=O)CCC[N+@@H]2CC=C(N3C(=O)Nc4c3cccc4)CC2)cc1	China Approved Name=Droperidol Indian Approved Name=droperidol FDA Approved Drug=DROPERIDOL	-6.6
4714	O(c1cc2c([C@H]3[C@H]([C@@H]4[C@](C)([C@@](O)(C#C)[C@H](O)C4)CC3)CC2)cc1)C1CCCC1	China Approved Name=nilestriol	-6.6
4719	O(c1cc2c([C@@H]3[C@@H]([C@@H]4[C@@](C)([C@@](O)(C#C)[C@H](O)C4)CC3)CC2)cc1)C1CCCC1	China Approved Name=nilestriol	-6.6
4725	O(c1cc2c([C@H]3[C@@H]([C@H]4[C@@](C)([C@@](O)(C#C)[C@H](O)C4)CC3)CC2)cc1)C1CCCC1	China Approved Name=nilestriol	-6.6
4726	O(c1cc2c([C@H]3[C@@H]([C@H]4[C@](C)([C@@](O)(C#C)[C@H](O)C4)CC3)CC2)cc1)C1CCCC1	China Approved Name=nilestriol	-6.6
4734	O=C1N2[C@H]3[C@@H]4[C@@]5(O)C(=CCO[C@@H]4C1)C[N+@H](C)CCC3(C(=O)C5)c1c2cccc1	Traditional Herbal Isolate=icajine	-6.6
4740	O=C1N2[C@H]3[C@@H]4[C@]5(O)C(=CCO[C@@H]4C1)C[N+@@H](C)CCC3(C(=O)C5)c1c2cccc1	Traditional Herbal Isolate=icajine	-6.6
4742	O=C1N2[C@@H]3[C@@H]4[C@]5(O)C(=CCO[C@@H]4C1)C[N+@@H](C)CCC3(C(=O)C5)c1c2cccc1	Traditional Herbal Isolate=icajine	-6.6
4780	Clc1ccc(CC2=NN([C@H]3CC[N+@@H](C)CCC3)C(=O)c3c2cccc3)cc1	Indian Approved Name=azelastine FDA Approved Drug=AZELASTINE HYDROCHLORIDE	-6.6
4830	O=C(O[C@H]1C=C2[C@@H]([C@H]3[C@H]([C@@H]4[C@@](C)([C@@](OC(=O)C)(C#C)CC4)CC3)CC2)CC1)C	Traditional Herbal Isolate=diacetate FDA Approved Drug=ETHYNODIOL DIACETATE	-6.6
4897	Clc1c(S(=O)(=O)N)cc2S(=O)(=O)N[C@H](Cc3ccccc3)Nc2c1	NPC Approved Name=benzylhydrochlorothiazide	-6.6
4935	Clc1cnc(N2[C@H](OC(=O)N3CC[N+H](C)CC3)c3nccnc3C2=O)cc1	US Illegal/Scheduled Drug (Schedule 4)=Zopiclone	-6.6
4961	O=C1[C@H](C)C[C@H]([C@@H]2[N+H]3[C@@H]([C@@H]4[C@@H](CC)C5(OC(=O)C(C)=C5)O[C@@H]4CCC3)CC2)O1	Traditional Herbal Isolate=stemonine	-6.6
5072	O=C(NC(C)(C)C)[C@H]1[C@]2(C)[C@@H]([C@H]3[C@@H]([C@]4(C)C(C=C(C(=O)[O-])CC4)=CC3)CC2)CC1	China Approved Name=epristeride	-6.6
5108	O([C@H]1[C@H](O)[C@H](O)[C@H](O)[C@@H](CO)O1)C1=C(c2ccccc2)Oc2c(C1=O)cccc2	Traditional Herbal Isolate=irridoid glycosides;purpureal glycosides	-6.6
5132	O[C@H]1C[C@@H]2[C@](C)([C@@H]3[C@H]([C@H]4[C@](C)([C@@H]([C@H](/C=C/[C@@H](C(C)C)C)C)CC4)CC3)CC2)CC1	Traditional Herbal Isolate=spongesterol	-6.6
5135	O[C@@H]1C[C@@H]2[C@@](C)([C@@H]3[C@H]([C@@H]4[C@](C)([C@@H]([C@H](/C=C/[C@@H](C(C)C)C)C)CC4)CC3)CC2)CC1	Traditional Herbal Isolate=spongesterol	-6.6
5136	O[C@@H]1C[C@@H]2[C@](C)([C@@H]3[C@@H]([C@H]4[C@@](C)([C@H]([C@H](/C=C/[C@@H](C(C)C)C)C)CC4)CC3)CC2)CC1	Traditional Herbal Isolate=spongesterol	-6.6
5146	Fc1c(N2C[C@H]3[N+H2]CCC[C@@H]3C2)c(OC)c2N(C3CC3)C=C(C(=O)[O-])C(=O)c2c1	Indian Approved Name=moxifloxacin;thiacetazone Australia Approved Name=MOXIFLOXACIN FDA Approved Drug=MOXIFLOXACIN HYDROCHLORIDE	-6.6
5184	[S@@H0](=O)(CCC1C(=O)N(N(c2ccccc2)C1=O)c1ccccc1)c1ccccc1	FDA Approved Drug=SULFINPYRAZONE	-6.6
5255	Clc1c([C@H](C#N)c2ccc(Cl)cc2)c(Cl)cc(N2C(=O)NC(=O)C=N2)c1	NPC Approved Name=diclazuril	-6.6
5257	O(C(C)(C)[C@H]1Oc2c(cc3c(OC(=O)C=C3)c2)C1)[C@H]1[C@@H](O)[C@H](O)[C@H](O)[C@H](CO)O1	Traditional Herbal Isolate=nodakenin	-6.6
5278	C(C)(C)[C@H]1[C@@]2(C)[C@@H]([C@@]3(C)[C@@](C)(C4=C([C@@]5(C)[C@H](C(C)(C)CCC5)CC4)CC3)CC2)CC1	Traditional Herbal Isolate=iso-fernene	-6.6
5291	C(C)(C)[C@H]1[C@@]2(C)[C@@H]([C@@]3(C)[C@@](C)([C@H]4[C@](C)([C@H]5[C@](C)(C(C)=CCC5)CC4)CC3)CC2)CC1	Traditional Herbal Isolate=filicene	-6.6
5332	O=C(C)[C@@H]1[C@H]2[C@@](C)([C@@H]3[C@@](C)([C@]4(C)[C@H]([C@]5(C)[C@H](C(C)(C)CCC5)CC4)CC3)CC2)CC1	Traditional Herbal Isolate=adiantone	-6.6
5336	O=C(C)[C@@H]1[C@H]2[C@](C)([C@H]3[C@](C)([C@]4(C)[C@@H]([C@]5(C)[C@H](C(C)(C)CCC5)CC4)CC3)CC2)CC1	Traditional Herbal Isolate=adiantone	-6.6
5374	O=C(OCC(=O)[C@H]1[C@]2(C)[C@@H]([C@H]3[C@@H]([C@@]4(C)C(=CC(=O)CC4)CC3)CC2)CC1)C(C)(C)C	FDA Approved Drug=DESOXYCORTICOSTERONE PIVALATE	-6.6
5379	O[C@H]1[C@@]2(C)[C@H]3[C@@H](C)[C@@H]4[N+H]([C@H]3C[C@@H]2[C@H]2[C@@H]([C@]3(C)C(=CC2)C[C@H](O)CC3)C1)C[C@@H](C)CC4	Traditional Herbal Isolate=rubijervine	-6.6
5402	O=C1C(c2ccc(O)cc2)=COc2c([C@H]3[C@H](O)[C@@H](O)[C@H](O)[C@H](CO)O3)c(O)ccc12	Traditional Herbal Isolate=puerarin	-6.6
5426	O[C@@H]1C[C@H]2[C@](C)([C@@H]3[C@H]([C@@H]4[C@@](C)([C@H]5[C@H](C)C6(O[C@H]5C4)OC[C@@H](C)CC6)CC3)CC2)CC1	Traditional Herbal Isolate=tigogenin;sarsasapogenin	-6.6
5438	O[C@H]1[C@@]2(C)[C@@H]3[C@@H]([C@@H]4[C@](C)([C@H]5[C@H](C)[C@]6(O[C@@H]5C4)OC[C@H](C)CC6)CC3)CC[C@@H]2CCC1	Traditional Herbal Isolate=spirostanol saponins	-6.6
5447	O=C(Oc1ccc(C2(c3ccc(OC(=O)C)cc3)C(=O)Nc3c(O2)cccc3)cc1)C	NPC Approved Name=bisoxatin diacetate	-6.6
5498	S(=O)(=O)(N)c1c(C(F)(F)F)cc2N[C@H](Cc3ccccc3)NS(=O)(=O)c2c1	FDA Approved Drug=BENDROFLUMETHIAZIDE	-6.6
5553	P(=O)(OC[C@H]1[C@@H](OP(=O)([O-])[O-])[C@H](O)[C@@H](n2c3ncnc(N)c3nc2)O1)([O-])[O-]	Indian Approved Name=quatenium 73	-6.6
5568	O=C(NCC(=O)[O-])[C@@H](C[N+@@H]1C[C@H](C)[C@](C)(c2cc(O)ccc2)CC1)Cc1ccccc1	FDA Approved Drug=ALVIMOPAN	-6.6
5614	O=CC=1[C@]2(C)[C@H]([C@]3(C)[C@@H]([C@@]4(C)[C@@](C)([C@H]5[C@](C)([C@H](C(C)C)CC5)CC4)CC3)CC2)CCC=1	Traditional Herbal Isolate=filicenal	-6.6
5634	O=C1C(C)(C)[C@H]2[C@](C)(C=3[C@@H]([C@]4(C)[C@@](C)([C@H]5[C@](C)([C@@H](C(C)C)CC5)CC4)CC=3)CC2)CC1	Traditional Herbal Isolate=arborinone	-6.6
5675	O=C1[C@H]2[C@@](C)([C@]3(C)[C@H]([C@@]4(C)[C@@H](C(C)(C)CCC4)CC3)C1)CC[C@@]1(C)[C@H]2[C@@H](C(C)C)CC1	Traditional Herbal Isolate=clerodone	-6.6
5725	O[C@@H]1CC23[C@](C)([C@@H]4C(OO2)([C@@H]2[C@](C)([C@@H]([C@H](/C=C/[C@H](C(C)C)C)C)CC2)CC4)C=C3)CC1	Traditional Herbal Isolate=ergosterol peroxide	-6.6
5726	O[C@@H]1CC23[C@](C)([C@H]4C(OO2)([C@@H]2[C@@](C)([C@H]([C@H](/C=C/[C@H](C(C)C)C)C)CC2)CC4)C=C3)CC1	Traditional Herbal Isolate=ergosterol peroxide	-6.6
5732	O[C@@H]1CC23[C@@](C)([C@H]4C(OO2)([C@@H]2[C@@](C)([C@@H]([C@H](/C=C/[C@H](C(C)C)C)C)CC2)CC4)C=C3)CC1	Traditional Herbal Isolate=ergosterol peroxide	-6.6
5761	O=C(C)c1c(O)c2c(O)c(-c3c(O)c4c(O)c(C(=O)C)c(C)cc4cc3)ccc2cc1C	Traditional Herbal Isolate=hemerocallin	-6.6
5780	O([C@H]1[C@@H](O)[C@H](O)[C@H](O)[C@H](CO)O1)c1cc([O-])c2C(=O)C=C(c3ccc(O)cc3)Oc2c1	Traditional Herbal Isolate=apigenin-7-glucoside;cosmosiin	-6.6
5783	O([C@@H]1[C@H](O)[C@@H](O)[C@@H](O)[C@H](CO)O1)c1cc([O-])c2C(=O)C(c3ccc(O)cc3)=COc2c1	Indian Approved Name=genistin	-6.6
5787	O([C@@H]1[C@@H](O)[C@@H](O)[C@H](O)[C@H](CO)O1)c1cc([O-])c2C(=O)C(c3ccc(O)cc3)=COc2c1	Indian Approved Name=genistin	-6.6
5792	O([C@@H]1[C@H](O)[C@@H](O)[C@@H](O)[C@@H](CO)O1)c1cc([O-])c2C(=O)C(c3ccc(O)cc3)=COc2c1	Indian Approved Name=genistin	-6.6
5793	O([C@H]1[C@H](O)[C@H](O)[C@H](O)[C@@H](CO)O1)c1cc([O-])c2C(=O)C(c3ccc(O)cc3)=COc2c1	Indian Approved Name=genistin	-6.6
5795	O([C@@H]1[C@@H](O)[C@H](O)[C@H](O)[C@@H](CO)O1)c1cc([O-])c2C(=O)C(c3ccc(O)cc3)=COc2c1	Indian Approved Name=genistin	-6.6
5798	O([C@H]1[C@@H](O)[C@H](O)[C@H](O)[C@H](CO)O1)c1ccc(C=2C(=O)c3c([O-])cc(O)cc3OC=2)cc1	Traditional Herbal Isolate=sophoricoside	-6.6
5832	O[C@@H]1[C@@H]2[C@@](C)([C@@H]3[C@H]([C@H]4[C@H]([C@H]5[C@@H]([C@](O)(C)[C@H]6[N+H](C[C@@H](C)CC6)C5)CC4)C3)C1)CC[C@H](O)C2	Traditional Herbal Isolate=peimine;verticine	-6.6
5842	F[C@H]1C=2[C@](C)([C@@H]3[C@H](O)C[C@@]4(C)[C@@](O)(C(=O)COC(=O)C)[C@H](C)C[C@H]4[C@H]3C1)C=CC(=O)C=2	FDA Approved Drug=PARAMETHASONE ACETATE	-6.6
5855	OC(CCC[C@@](O)(C)[C@H]1[C@@H](O)C[C@H]2[C@]1(C)CC[C@H]1[C@]3(C)C(=CC[C@H]21)C[C@H](O)CC3)(C)C	Traditional Herbal Isolate=guggulsterol;z-guggulsterol	-6.6
5865	FC(F)(F)c1cc2/C(=C/CCN3CC[N+H](CCO)CC3)/c3c(Sc2cc1)cccc3	China Approved Name=flupentixol Indian Approved Name=flupentixol	-6.6
5870	F[C@@H]1C=2[C@@](C)([C@H]3[C@H](O)C[C@]4(C)[C@]5(C(=O)CO)OC(C)(C)O[C@@H]5C[C@H]4[C@H]3C1)CCC(=O)C=2	FDA Approved Drug=FLURANDRENOLIDE	-6.6
5931	O=C1[C@@H](C)[C@@]2(C)[C@H]([C@]3(C)[C@@H](C(=O)C2)[C@]2(C)[C@](C)([C@H]4[C@](C)(CC2)CCC(C)(C)C4)CC3)CC1	Traditional Herbal Isolate=putranjivadione	-6.6
5949	O=C1C(C)(C)[C@@H]2[C@@](C)([C@@H]3C([C@@]4(C)[C@@](C)([C@@H]([C@@H](CC/C=C(\C)/C)C)[C@@H](O)C4)CC3)=CC2)CC1	Traditional Herbal Isolate=kulinone	-6.6
5982	OC[C@@]12[C@H](C=3[C@](C)([C@@]4(C)[C@@H]([C@]5(C)[C@H](C(C)(C)[C@@H](O)CC5)CC4)CC=3)CC1)CC(C)(C)CC2	Traditional Herbal Isolate=erythrodiol monocaprylate	-6.6
5988	OC[C@@]12[C@@H](C=3[C@](C)([C@@]4(C)[C@H]([C@]5(C)[C@H](C(C)(C)[C@@H](O)CC5)CC4)CC=3)CC1)CC(C)(C)CC2	Traditional Herbal Isolate=erythrodiol monocaprylate	-6.6
5993	O[C@@H]1[C@]2(C)[C@H](C=3[C@@](C)([C@]4(C)[C@H]([C@]5(C)[C@@H](C(C)(C)[C@@H](O)CC5)CC4)CC=3)CC2)CC(C)(C)C1	Traditional Herbal Isolate=sophoradiol	-6.6
5997	O[C@@H]1[C@]2(C)[C@@H](C=3[C@@](C)([C@]4(C)[C@H]([C@]5(C)[C@@H](C(C)(C)[C@@H](O)CC5)CC4)CC=3)CC2)CC(C)(C)C1	Traditional Herbal Isolate=sophoradiol	-6.6
6007	O[C@H]1C(C)(C)[C@H]2[C@@](C)([C@@H](CC[C@@H]3C(=C)CC[C@H]4C(C)(C)[C@H](O)CC[C@@]34C)C(=C)CC2)CC1	Traditional Herbal Isolate=alpha-onocerin	-6.6
6029	O[C@@](CC/C=C(\C)/C)(C)[C@H]1[C@@H]2[C@](C)([C@]3(C)[C@H]([C@]4(C)[C@H](C(C)(C)[C@@H](O)CC4)CC3)CC2)CC1	Traditional Herbal Isolate=dammarenediol ii	-6.6
6036	O(C)c1c([C@H]2[C@H](O)[C@H](O)[C@@H](O)[C@H](CO)O2)c([O-])c2C(=O)C=C(c3ccc(O)cc3)Oc2c1	Traditional Herbal Isolate=swertisin	-6.6
6041	O(C)c1c([C@H]2[C@H](O)[C@@H](O)[C@@H](O)[C@@H](CO)O2)c([O-])c2C(=O)C=C(c3ccc(O)cc3)Oc2c1	Traditional Herbal Isolate=swertisin	-6.6
6044	O(C)c1c([C@@H]2[C@@H](O)[C@H](O)[C@@H](O)[C@@H](CO)O2)c([O-])c2C(=O)C=C(c3ccc(O)cc3)Oc2c1	Traditional Herbal Isolate=swertisin	-6.6
6046	O(C)c1c([C@@H]2[C@@H](O)[C@@H](O)[C@H](O)[C@@H](CO)O2)c([O-])c2C(=O)C=C(c3ccc(O)cc3)Oc2c1	Traditional Herbal Isolate=swertisin	-6.6
6047	O(C)c1c([C@@H]2[C@H](O)[C@@H](O)[C@H](O)[C@@H](CO)O2)c([O-])c2C(=O)C=C(c3ccc(O)cc3)Oc2c1	Traditional Herbal Isolate=swertisin	-6.6
6053	O([C@H]1[C@H](O)[C@H](O)[C@@H](O)[C@@H](CO)O1)c1cc([O-])c2C(=O)C([O-])=C(c3ccc(O)cc3)Oc2c1	Traditional Herbal Isolate=kaempferol-3-galactoside daempferol	-6.6
6056	O(C)c1c(O[C@H]2[C@H](O)[C@H](O)[C@@H](O)[C@H](CO)O2)cc2OC=C(c3ccc(O)cc3)C(=O)c2c1	Indian Approved Name=glycitein	-6.6
6072	O([C@H]1[C@@H](O)[C@H](O)[C@H](O)[C@H](CO)O1)c1cc2OC[C@@H]3[C@@H](Oc4c3cc3OCOc3c4)c2cc1	Traditional Herbal Isolate=trifolirhizin	-6.6
6080	O([C@H]1[C@H](O)[C@H](O)[C@H](O)[C@@H](C)O1)C1=C(c2cc(O)c(O)cc2)Oc2c(c([O-])cc(O)c2)C1=O	Traditional Herbal Isolate=quercetrin	-6.6
6082	O([C@H]1[C@@H](O)[C@H](O)[C@H](O)[C@H](CO)O1)c1cc([O-])c2C(=O)C=C(c3cc(O)c(O)cc3)Oc2c1	Traditional Herbal Isolate=luteolin-7-beta-d-glucoside;luteolin-7-beta-d-glucopyranoside	-6.6
6089	S(=O)(=O)(O/N=C(/S[C@H]1[C@@H](O)[C@H](O)[C@H](O)[C@H](CO)O1)\Cc1c2c([nH]c1)cccc2)[O-]	Traditional Herbal Isolate=glucobrassicin	-6.6
6093	S(c1cc(NC(=O)COC)c(N/C(=[N+H]/C(=O)OC)/NC(=O)OC)cc1)c1ccccc1	NPC Approved Name=febantel	-6.6
6130	O=C(OCC)C1(c2ccccc2)CC[N+H](CCC(C#N)(c2ccccc2)c2ccccc2)CC1	China Approved Name=diphenoxylate FDA Approved Drug=DIPHENOXYLATE HYDROCHLORIDE	-6.6
6134	O=C([O-])[C@H](CC/C=C(\C)/C)[C@@H]1[C@@]2(C)[C@](C)(C3=C([C@]4(C)[C@@H](C(C)(C)C(=O)CC4)CC3)CC2)CC1	Traditional Herbal Isolate=pinicolic acid	-6.6
6161	O=C(N)C=1C(=O)[C@@]2(O)C([O-])=C3C(=O)c4c([O-])ccc(N(C)C)c4C[C@@H]3C[C@@H]2[C@@H]([N+H](C)C)C=1[O-]	Indian Approved Name=minocycline Australia Approved Name=MINOCYCLINE	-6.6
6169	O=C([O-])[C@]12[C@@H](C=3[C@@](C)([C@]4(C)[C@H]([C@@]5(C)[C@H](C(C)(C)[C@H](O)CC5)CC4)CC=3)CC1)CC(C)(C)CC2	Traditional Herbal Isolate=pentacyclic triterpene	-6.6
6173	O=C([O-])[C@]12[C@@H](C=3[C@@](C)([C@@]4(C)[C@@H]([C@]5(C)[C@H](C(C)(C)[C@H](O)CC5)CC4)CC=3)CC1)CC(C)(C)CC2	Traditional Herbal Isolate=pentacyclic triterpene	-6.6
6174	O=C([O-])[C@]12[C@@H](C=3[C@@](C)([C@@]4(C)[C@@H]([C@@]5(C)[C@@H](C(C)(C)[C@@H](O)CC5)CC4)CC=3)CC1)CC(C)(C)CC2	Traditional Herbal Isolate=pentacyclic triterpene	-6.6
6176	O=C([O-])[C@@]12[C@@H](C=3[C@](C)([C@@]4(C)[C@H]([C@]5(C)[C@H](C(C)(C)[C@@H](O)CC5)CC4)CC=3)CC1)CC(C)(C)CC2	Traditional Herbal Isolate=pentacyclic triterpene	-6.6
6198	O=C([O-])[C@@]1(C)[C@@H](O)CC[C@]2(C)[C@@H]1CC[C@]1(C)[C@@]3(C)[C@@H]([C@]4(C)[C@H]([C@@H](C(=C)C)CC4)CC3)CC[C@H]21	Traditional Herbal Isolate=woodwardic acid	-6.6
6199	O=C([O-])[C@@]1(C)[C@@H](O)CC[C@]2(C)[C@@H]1CC[C@]1(C)[C@@]3(C)[C@@H]([C@@]4(C)[C@H]([C@H](C(=C)C)CC4)CC3)CC[C@H]21	Traditional Herbal Isolate=woodwardic acid	-6.6
6203	O=C([O-])[C@H](NC(=O)c1sc(N(Cc2cc3C(=O)NC(C)=Nc3cc2)C)cc1)CCC(=O)[O-]	NPC Approved Name=raltitrexed	-6.6
6241	OC[C@]12[C@H](O)C[C@@]3(C)[C@@]4(C)[C@@H]([C@]5(C)[C@H](C(C)(C)[C@@H](O)CC5)CC4)CC=C3[C@H]1CC(C)(C)CC2	Traditional Herbal Isolate=primulagenin a	-6.6
6250	OC[C@@]1(C)[C@H](O)CC[C@]2(C)[C@H]1CC[C@@]1(C)[C@H]2CC[C@H]2[C@]3(C)[C@H](C(C)(C)[C@H](O)CC3)CC=C2C1	Traditional Herbal Isolate=lycoclavanol	-6.6
6265	O=C(/C=C/c1cc(C/C=C(\C)/C)c(O)c(C/C=C(\C)/C)c1)c1c(O)c(C/C=C(\C)/C)c(O)cc1	Traditional Herbal Isolate=sophoradin	-6.6
6275	O[C@@H]1C(C)(C)[C@H]2[C@](C)([C@H]3[C@@](C)([C@]4(C)[C@H]([C@@H](O)C3)[C@H]([C@]3(C)OC(C)(C)CCC3)CC4)CC2)CC1	Traditional Herbal Isolate=panaxadiol	-6.6
6286	O[C@@H]1C(C)(C)[C@H]2[C@](C)([C@H]3[C@](O)(C[C@@]4(C)[C@H]([C@@]5(C)[C@H](C(C)(C)[C@@H](O)CC5)CC4)CC3)CC2)CC1	Traditional Herbal Isolate=tohogenol	-6.6
6287	O[C@@H]1C(C)(C)[C@H]2[C@](C)([C@H]3[C@](O)(C[C@@]4(C)[C@H]([C@@]5(C)[C@@H](C(C)(C)[C@@H](O)CC5)CC4)CC3)CC2)CC1	Traditional Herbal Isolate=tohogenol	-6.6
6299	O[C@@](CC/C=C(\C)/C)(C)[C@@H]1[C@@H]2[C@@H](O)C[C@@H]3[C@@](C)([C@@]2(C)CC1)CC[C@@H]1C(C)(C)[C@H](O)CC[C@@]31C	Traditional Herbal Isolate=betulafolienetriol	-6.6
6300	S(=O)(=O)(O[C@@H]1[C@H](O)[C@H](O[C@H]2[C@@H](O)[C@H](O)[C@@H](O)[C@@H](C(=O)[O-])O2)[C@@H](NC(=O)C)[C@H](O)O1)[O-]	FDA Approved Drug=HEPARIN CALCIUM	-6.6
6327	O=C(N[C@H]1C(=O)N2[C@@H](C(=O)OCC3=C(C)OC(=O)O3)C(C)(C)S[C@@H]12)[C@@H]([N+H3])c1ccccc1	NPC Approved Name=lenampicillin	-6.6
6362	O=C(NCCCCCC(=O)[O-])[C@@H](NC(=O)Cc1ccccc1)[C@H]1SC(C)(C)[C@@H](C(=O)[O-])[N+H2]1	FDA Approved Drug=BENZYLPENICILLOYL POLYLYSINE	-6.6
6408	O=C([O-])[C@@]1(C)C[C@@H]2[C@](C)(CC[C@]3(C)[C@]4(C)[C@@H](C(=O)C=C23)[C@@]2(C)[C@@H](C(C)(C)[C@@H](O)CC2)CC4)CC1	Indian Approved Name=glycyrrhiza glabara	-6.6
6418	O=C([O-])[C@H](NC(=O)c1ccc(NC[C@@H]2N(C=O)C=3C(=O)N=C(N)NC=3NC2)cc1)CCC(=O)[O-]	Indian Approved Name=calcium folinate Traditional Herbal Isolate=folinic acid Australia Approved Name=FOLINIC ACID;LEUCOVORIN China Approved Name=leucovorin WHO Essential Medicine=calcium folinate FDA Approved Drug=LEUCOVORIN CALCIUM	-6.6
6437	O[C@@H]1C(C)(C)[C@@H]2[C@](C)([C@@H]3[C@@](C)(C45[C@H]([C@H]6[C@](O)(C)C[C@@H](/C=C(\C)/C)OC6(OC4)C5)CC3)CC2)CC1	Traditional Herbal Isolate=jujubogenin	-6.6
6489	O=C1[C@H]([C@@H]2[C@]3(C)[C@H]([C@]4(C)[C@@H](O)C[C@@H]5C(C)(C)[C@@H](O)CC[C@]5(C)[C@@H]4CC3)CC2)C[C@@H](CC(C)C)O1	Traditional Herbal Isolate=melialactone	-6.6
6492	O=C1[C@H]([C@@H]2[C@]3(C)[C@@H]([C@]4(C)[C@H](O)C[C@H]5C(C)(C)[C@@H](O)CC[C@]5(C)[C@@H]4CC3)CC2)C[C@@H](CC(C)C)O1	Traditional Herbal Isolate=melialactone	-6.6
6506	S(=O)(=O)(N1CC[N+H](C)CC1)c1cc(c(OCC)cc1)C1=Nc2c(CCC)nn(C)c2C(=O)N1	NPC Approved Name=sildenafil FDA Approved Drug=SILDENAFIL CITRATE	-6.6
6525	O[C@](CC/C=C(\C)/C)(C)[C@]1(O)[C@@H]2[C@@H](O)C[C@@H]3[C@@](C)([C@]2(C)CC1)CC[C@@H]1C(C)(C)[C@@H](O)CC[C@@]31C	Traditional Herbal Isolate=betulafolienetetraol	-6.6
6529	O[C@](CC/C=C(\C)/C)(C)[C@]1(O)[C@@H]2[C@@H](O)C[C@@H]3[C@@](C)([C@@]2(C)CC1)CC[C@H]1C(C)(C)[C@@H](O)CC[C@@]31C	Traditional Herbal Isolate=betulafolienetetraol	-6.6
6532	O[C@](CC/C=C(\C)/C)(C)[C@]1(O)[C@@H]2[C@@H](O)C[C@H]3[C@@](C)([C@@]2(C)CC1)CC[C@H]1C(C)(C)[C@@H](O)CC[C@@]31C	Traditional Herbal Isolate=betulafolienetetraol	-6.6
6536	O(C)c1c(OC)cc2c([C@H]3[N+H](C[C@H](CC)[C@H](C[C@@H]4[N+H2]CCc5c6c([nH]c45)ccc(O)c6)C3)CC2)c1	Traditional Herbal Isolate=tubulosine	-6.6
6545	O([C@@H](COCc1ccccc1)[C@H]1[C@H](OCc2ccccc2)[C@H](O)[C@@H](OCC)O1)Cc1ccccc1	NPC Approved Name=tribenoside	-6.6
6551	O=C(OC[C@@]12C(=O)O[C@@]3(C)[C@]1(O[C@H]1[C@@H](O)[C@H](O)[C@H](O)[C@H](CO)O1)C[C@H]2[C@@H](O)C3)c1ccccc1	Traditional Herbal Isolate=albiflorin	-6.6
6552	O=C(OC[C@@]12C(=O)O[C@@]3(C)[C@]1(O[C@H]1[C@@H](O)[C@H](O)[C@H](O)[C@H](CO)O1)C[C@@H]2[C@@H](O)C3)c1ccccc1	Traditional Herbal Isolate=albiflorin	-6.6
6557	O=C(OC[C@]12C(=O)O[C@@]3(C)[C@]1(O[C@H]1[C@@H](O)[C@H](O)[C@H](O)[C@H](CO)O1)C[C@@H]2[C@@H](O)C3)c1ccccc1	Traditional Herbal Isolate=albiflorin	-6.6
6565	O(C[C@@]1(C)[C@H]2[C@@](C)([C@H](CCC=3C(=O)OCC=3)C(=C)CC2)CCC1)[C@H]1[C@@H](O)[C@H](O)[C@H](O)[C@H](CO)O1	Traditional Herbal Isolate=neoandrographolide	-6.6
6652	O([C@H]1[C@@H](O)[C@H](O)[C@H](O)[C@H](CO)O1)[C@H]1[C@H](C)[C@H]2[C@@](C)([C@H]3C([C@@H](C)C2)=C[C@]([C@@H](O)CO)(C)CC3)CC1	Traditional Herbal Isolate=darutoside	-6.6
6655	O=C([O-])[C@@]12[C@@]3(C)[C@@H]([C@]4(C)[C@@H](C(C)(C)[C@@H](O)CC4)CC3)CC=C1[C@@H]1[C@@](C(=O)[O-])(CC2)CCC(C)(C)C1	Traditional Herbal Isolate=cincholic acid	-6.6
6711	O=C1[C@H]2C(C)(C)[C@H](O)[C@H](O)C[C@]2(C)[C@H]2C(=C1)C[C@]1(C)[C@H]([C@@]3(C)[C@@H]([C@](CO)(C)[C@H](O)CC3)CC1)CC2	Traditional Herbal Isolate=lycoclavanin	-6.6
6717	O=C1[C@H]2C(C)(C)[C@H](O)[C@H](O)C[C@@]2(C)[C@H]2C(=C1)C[C@]1(C)[C@@H]([C@@]3(C)[C@@H]([C@](CO)(C)[C@H](O)CC3)CC1)CC2	Traditional Herbal Isolate=lycoclavanin	-6.6
6722	Clc1ccc(-c2cnc3[nH]cc(C(=O)c4c(F)c(NS(=O)(=O)CCC)ccc4F)c3c2)cc1	FDA Approved Drug=VEMURAFENIB	-6.6
6725	O(C)c1c(O[C@H]2[C@H](O)[C@H](O)[C@@H](O)[C@@H](CO)O2)cc([O-])c2C(=O)C([O-])=C(c3ccc(OC)cc3)Oc12	Traditional Herbal Isolate=prudomenin	-6.6
6726	O(C)c1c(O[C@H]2[C@@H](O)[C@H](O)[C@@H](O)[C@H](CO)O2)cc([O-])c2C(=O)C([O-])=C(c3ccc(OC)cc3)Oc12	Traditional Herbal Isolate=prudomenin	-6.6
6734	O[C@@H](C(O)(C)C)[C@H]1O[C@H](O)[C@@H]([C@H]2[C@@]3(C)[C@](C)(C=4[C@H]([C@]5(C)[C@@H](C(C)(C)[C@@H](O)CC5)CC=4)CC3)CC2)C1	Traditional Herbal Isolate=melianotriol	-6.6
6738	O[C@H](C(O)(C)C)[C@H]1O[C@@H](O)[C@@H]([C@H]2[C@]3(C)[C@](C)(C=4[C@H]([C@]5(C)[C@@H](C(C)(C)[C@H](O)CC5)CC=4)CC3)CC2)C1	Traditional Herbal Isolate=melianotriol	-6.6
6751	Clc1cc(C(=O)NCCc2ccc(S(=O)([O-])=NC(=O)NC3CCCCC3)cc2)c(OC)cc1	China Approved Name=glibenclamide Indian Approved Name=glibenclamide WHO Essential Medicine=glibenclamide Australia Approved Name=GLIBENCLAMIDE FDA Approved Drug=GLYBURIDE	-6.6
6775	S(=O)(=O)(O[C@@H]1[C@H](C)[C@@H]2[C@@H](O)[C@]3([C@@H](C(=O)[O-])C)[C@H]([C@]2(C)CC3)C1)c1cc2SC(=S)Nc2cc1	NPC Approved Name=santonic acid	-6.6
6792	O=C(OCC)[C@@H]([N+H2][C@@H](C(=O)N1[C@@H](C(=O)[O-])Cc2c(cc(OC)c(OC)c2)C1)C)CCc1ccccc1	FDA Approved Drug=MOEXIPRIL HYDROCHLORIDE	-6.6
6795	O=C1C(C)(C)C=2[C@@H]([C@@]3(C)C(=O)C[C@@]4(C)[C@@](C)([C@H]3CC=2)C[C@@H]2O[C@H](C(O)(C)C)CC(=O)[C@H](C)[C@H]42)C=C1O	Traditional Herbal Isolate=cucurbitacins	-6.6
6894	O=C(OC[C@]12O[C@@H]1[C@@H](O)[C@H]1[C@@H]2[C@@H](O[C@H]2[C@@H](O)[C@@H](O)[C@H](O)[C@@H](CO)O2)OC=C1)c1cc(OC)c(O)cc1	Traditional Herbal Isolate=kutkoside	-6.6
6895	O=C(OC[C@@]12O[C@H]1[C@@H](O)[C@@H]1[C@H]2[C@@H](O[C@@H]2[C@@H](O)[C@@H](O)[C@H](O)[C@@H](CO)O2)OC=C1)c1cc(OC)c(O)cc1	Traditional Herbal Isolate=kutkoside	-6.6
6915	O([C@@H](C[C@H](C)C1=C2[C@](C)([C@@]3(C)[C@@H]([C@@H](O)C2)[C@]2(C)[C@H](C(C)(C)C(=O)CC2)CC3)CC1)[C@H]1C(C)(C)O1)C(=O)C	Traditional Herbal Isolate=alisol a;alisol b;alisol monoacetate	-6.6
6931	O=C(N[C@H]1C(=O)N2C(C(=O)[O-])=C(Cn3c4[n+](nccc4)cc3)CS[C@H]12)/C(=N/OC)/c1nc(N)sn1	NPC Approved Name=cefozopran	-6.6
6935	O=C(/C=C/c1ccccc1)c1c(O)c(Cc2c(O)c(C(=O)C)c(O)c(C)c2O)c(O)c2c1OC(C)(C)C=C2	Traditional Herbal Isolate=rottlerin;kamalin-1	-6.6
7034	S(=O)(=O)([O-])[C@@H](C(=O)N[C@H]1C(=O)N2C(C(=O)[O-])=C(C[n+]3ccc(C(=O)N)cc3)CS[C@H]12)c1ccccc1	NPC Approved Name=cefsulodin	-6.6
7054	F[C@@]12[C@@H](O)C[C@@]3(C)[C@]4(C(=O)COC(=O)CC(C)(C)C)OC(C)(C)O[C@@H]4C[C@@H]3[C@H]1CCC=1[C@@]2(C)C=CC(=O)C=1	FDA Approved Drug=TRIAMCINOLONE HEXACETONIDE	-6.6
7074	O=C(O[C@H]1[C@@H](O)[C@@H]2C(C(=O)OC)=CO[C@@H](O[C@H]3[C@@H](O)[C@@H](O)[C@H](O)[C@@H](CO)C3)[C@H]2[C@H]1C)/C=C/c1ccccc1	Traditional Herbal Isolate=iridoid glucosides	-6.6
7076	O=C(O[C@H]1[C@@H](O)[C@@H]2C(C(=O)OC)=CO[C@@H](O[C@H]3[C@@H](O)[C@@H](O)[C@@H](O)[C@@H](CO)C3)[C@H]2[C@H]1C)/C=C/c1ccccc1	Traditional Herbal Isolate=iridoid glucosides	-6.6
7083	O(C)[C@@H]1[C@@H](O)[C@@H](C)O[C@H](O[C@@H]2C[C@H]3[C@@](C)([C@H]4[C@@H]([C@]5(O)[C@](C)([C@@H]([C@@H](O)C5)C5=CC(=O)OC5)CC4)CC3)CC2)C1	Traditional Herbal Isolate=deacetylo-leandrin	-6.6
7099	O([C@@H]1O[C@@H](C)[C@H](O)[C@H](O)C1)[C@@H]1C[C@]2(O)[C@@](CO)([C@@H]3[C@H]([C@]4(O)[C@@](C)([C@@H](C5=CC(=O)OC5)CC4)CC3)CC2)CC1	Traditional Herbal Isolate=helveticosol	-6.6
7104	O([C@@H]1O[C@@H](C)[C@H](O)[C@H](O)C1)[C@@H]1C[C@]2(O)[C@@](CO)([C@H]3[C@@H]([C@]4(O)[C@@](C)([C@H](C5=CC(=O)OC5)CC4)CC3)CC2)CC1	Traditional Herbal Isolate=helveticosol	-6.6
7142	O=C1[C@H](C(C)C)NC(=O)/C(=C\C)/NC(=O)[C@H]2NC(=O)[C@@H](C(C)C)NC(=O)C[C@@H](O1)/C=C/CCSSC2	FDA Approved Drug=ROMIDEPSIN	-6.6
7153	O(/N=C(/C(=O)N[C@H]1C(=O)N2C(C(=O)[O-])=C(C[n+]3ccccc3)CS[C@H]12)\c1nc(N)sc1)C(C(=O)[O-])(C)C	China Approved Name=ceftazidime WHO Essential Medicine=ceftazidime Indian Approved Name=ceftazidime FDA Approved Drug=CEFTAZIDIME;CEFTAZIDIME SODIUM	-6.6
7170	O(C)[C@@H]1[C@@H](O)[C@@H](C)O[C@@H](O[C@H]2C[C@H]3[C@@](C)([C@@H]4C(=O)[C@H](O)[C@]5(C)[C@H](C6=CC(=O)OC6)CC[C@@]5(O)[C@@H]4CC3)CC2)C1	Traditional Herbal Isolate=caudoside;sarmutoside	-6.6
7181	O=C[C@]12[C@@H]3[C@@H](O)C[C@@]4(C)[C@H](C5=CC(=O)OC5)CC[C@]4(O)[C@@H]3CC[C@H]1C[C@@H](O[C@H]1O[C@@H](C)[C@H](O)[C@H](OC)C1)CC2	Traditional Herbal Isolate=sinoside	-6.6
7208	O(C)c1c(OC)ccc(C[C@H]2[C@H](Cc3cc(OC)c4O[C@@H]([C@H](CO)c4c3)c3cc(OC)c(O)cc3)C(=O)OC2)c1	Traditional Herbal Isolate=lappaol	-6.6
7251	O([C@@H]1[C@@H](O)[C@H](O)[C@@H](O)[C@H](C)O1)[C@@H]1C[C@]2(O)[C@@](CO)([C@@H]3[C@H]([C@]4(O)[C@@](C)([C@H](C5=CC(=O)OC5)CC4)CC3)CC2)CC1	Traditional Herbal Isolate=convallatoxol	-6.6
7256	O([C@@H]1[C@@H](O)[C@@H](O)[C@@H](O)[C@H](C)O1)[C@@H]1C[C@]2(O)[C@@](CO)([C@H]3[C@H]([C@]4(O)[C@@](C)([C@H](C5=CC(=O)OC5)CC4)CC3)CC2)CC1	Traditional Herbal Isolate=convallatoxol	-6.6
7280	C(=C\C=C\C=C(/C=C\C=C(\C=C\[C@@]12C(C)(C)CCC[C@@]1(C)O2)/C)\C)(\C=C/C=C(/C=C/[C@@H]1C(C)=CCCC1(C)C)\C)/C	Traditional Herbal Isolate=alpha-carotene-5 6-epoxide	-6.6
7283	O[C@H]1CC(C)(C)C(/C=C/C(=C/C=C/C(=C/C=C/C=C(\C=C\C=C(/C=C/C=2C(C)(C)CCCC=2C)\C)/C)/C)/C)=C(C)C1	Traditional Herbal Isolate=physoxanthin	-6.6
7320	O=C([C@](O)(C)[C@@H]1[C@H](O)C[C@]2(C)[C@@]1(C)CC(=O)[C@]1(C)[C@H]2CC=C2C(C)(C)[C@@H](O)C(=O)C[C@@H]12)/C=C/C(OC(=O)C)(C)C	Traditional Herbal Isolate=iso-cucurbitacin b	-6.6
7361	O=C[C@]12[C@@](O)(C[C@@H](O[C@H]3[C@H](O)[C@H](O)[C@@H](O)[C@@H](C)O3)CC1)CC[C@@H]1[C@]3(O)[C@@](C)([C@H](O)C[C@H]21)[C@H](C1=CC(=O)OC1)CC3	Traditional Herbal Isolate=alpha-antiarin	-6.6
7366	O=C[C@]12[C@@](O)(C[C@@H](O[C@H]3[C@@H](O)[C@@H](O)[C@@H](O)[C@H](C)O3)CC1)CC[C@@H]1[C@]3(O)[C@@](C)([C@H](O)C[C@@H]21)[C@H](C1=CC(=O)OC1)CC3	Traditional Herbal Isolate=alpha-antiarin	-6.6
7372	O=C[C@]12[C@@](O)(C[C@@H](O[C@H]3[C@H](O)[C@H](O)[C@@H](O)[C@@H](C)O3)CC1)CC[C@H]1[C@]3(O)[C@@](C)([C@H](O)C[C@@H]21)[C@H](C1=CC(=O)OC1)CC3	Traditional Herbal Isolate=alpha-antiarin	-6.6
7378	S(C[C@H](NC(=O)c1c(C)c(O)ccc1)[C@@H](O)C[N+@H]1[C@@H](C(=O)NC(C)(C)C)C[C@H]2[C@H](C1)CCCC2)c1ccccc1	Indian Approved Name=nelfinavir FDA Approved Drug=NELFINAVIR MESYLATE	-6.6
7379	S(C[C@H](NC(=O)c1c(C)c(O)ccc1)[C@@H](O)C[N+@@H]1[C@@H](C(=O)NC(C)(C)C)C[C@H]2[C@H](C1)CCCC2)c1ccccc1	Indian Approved Name=nelfinavir FDA Approved Drug=NELFINAVIR MESYLATE	-6.6
7424	O=C(O[C@@H]1[C@]2(O)O[C@H]3[C@@H](O[C@H]2O[C@@H](C)C1)C[C@@H]1[C@@](C=O)([C@@H]2[C@H]([C@]4(O)[C@@](C)([C@H](C5=CC(=O)OC5)CC4)CC2)CC1)C3)C	Traditional Herbal Isolate=asclepiadin;asclepin	-6.6
7444	O([C@@H]1[C@@H](O)[C@H](O)[C@H](O)[C@H](CO)O1)[C@H]1CC=2[C@@](C)([C@@H]3[C@@H]([C@@H]4[C@](C)([C@H]([C@H](CC[C@H](C(C)C)CC)C)CC4)CC3)CC=2)CC1	Traditional Herbal Isolate=beta-sitosterol-beta-d-glucopyranoside	-6.6
7454	O(C)c1c2Oc3c4c(OC)cc5c3[C@H]([N+H2]CC5)Cc3ccc(Oc5c(OC)ccc(c5)CC5=NCCc(c15)cc2O4)cc3	Traditional Herbal Isolate=normenisarine	-6.6
7460	O=C(N[C@]1(C(C)C)C(=O)N2[C@@H](CC(C)C)C(=O)N3[C@H]([C@]2(O)O1)CCC3)[C@H]1C[N+@@H](C)[C@@H]2[C@H](c3c4c([nH]cc4C2)ccc3)C1	NPC Approved Name=dihydro-alpha-ergocryptine	-6.6
7469	O=C(N[C@]1(C(C)C)C(=O)N2[C@@H](CC(C)C)C(=O)N3[C@@H]([C@]2(O)O1)CCC3)[C@@H]1C[N+@H](C)[C@H]2[C@H](c3c4c([nH]cc4C2)ccc3)C1	NPC Approved Name=dihydro-alpha-ergocryptine	-6.6
7484	O(C)c1c(O)c2Oc3c(OC)cc4c([C@@H]([N+H2]CC4)Cc4cc(c(O)cc4)Oc4ccc(cc4)C[C@H]4[N+@H](C)CCc(c24)c1)c3	Traditional Herbal Isolate=trilobamine	-6.6
7485	O(C)c1c(O)c2Oc3c(OC)cc4c([C@@H]([N+H2]CC4)Cc4cc(c(O)cc4)Oc4ccc(cc4)C[C@H]4[N+@@H](C)CCc(c24)c1)c3	Traditional Herbal Isolate=trilobamine	-6.6
7488	O(C)c1c(O)c2Oc3c(OC)cc4c([C@H]([N+H2]CC4)Cc4cc(c(O)cc4)Oc4ccc(cc4)C[C@H]4[N+@H](C)CCc(c24)c1)c3	Traditional Herbal Isolate=trilobamine	-6.6
7530	O[C@H]1C=C(C)[C@H](/C=C/C(=C/C=C\C(=C/C=C/C=C(\C=C/C=C(/C=C/[C@]23C(C)(C)C[C@H](O)C[C@]2(C)O3)\C)/C)\C)/C)C(C)(C)C1	Traditional Herbal Isolate=taraxanthin	-6.6
7580	O=C(N[C@]1(C(C)C)C(=O)N2[C@@H](C(CC)(C)C)C(=O)N3[C@H]([C@]2(O)O1)CCC3)[C@H]1C[N+@@H](C)[C@@H]2[C@H](c3c4c([nH]cc4C2)ccc3)C1	FDA Approved Drug=ERGOLOID MESYLATES	-6.6
7587	O=C(N[C@]1(C(C)C)C(=O)N2[C@@H](C(CC)(C)C)C(=O)N3[C@@H]([C@]2(O)O1)CCC3)[C@H]1C[N+@H](C)[C@@H]2[C@@H](c3c4c([nH]cc4C2)ccc3)C1	FDA Approved Drug=ERGOLOID MESYLATES	-6.6
7595	O(C[C@@H]1[C@@H](O)[C@@H](O)[C@@H](O)[C@H](OC2=C(c3ccc(O)cc3)Oc3c(c([O-])cc(O)c3)C2=O)O1)[C@H]1[C@H](O)[C@@H](O)[C@H](O)[C@@H](C)O1	Traditional Herbal Isolate=kaempferol-3-robinobioside	-6.6
7597	O(C[C@H]1[C@@H](O)[C@@H](O)[C@@H](O)[C@H](OC2=C(c3ccc(O)cc3)Oc3c(c([O-])cc(O)c3)C2=O)O1)[C@H]1[C@@H](O)[C@@H](O)[C@H](O)[C@@H](C)O1	Traditional Herbal Isolate=kaempferol-3-robinobioside	-6.6
7608	O(C[C@@H]1[C@@H](O)[C@H](O)[C@H](O)[C@H](OC2=C(c3ccc(O)cc3)Oc3c(c([O-])cc(O)c3)C2=O)O1)[C@H]1[C@@H](O)[C@@H](O)[C@H](O)[C@H](C)O1	Traditional Herbal Isolate=kaempferol-3-robinobioside	-6.6
7686	Clc1c(OC)cc2cc1N(C)C(=O)C[C@@H](OC(=O)C)[C@@]1(C)O[C@@H]1[C@H](C)C1OC(=O)NC(O)([C@@H](OC)/C=C/C=C(/C)\C2)C1	Traditional Herbal Isolate=maytanacine	-6.6
7702	O(C)c1c([C@H]2[C@H](O)[C@@H](O)[C@H](O)[C@@H](CO)O2)c([O-])c2C(=O)C=C(c3ccc(O[C@H]4[C@@H](O)[C@@H](O)[C@H](O)[C@H](CO)O4)cc3)Oc2c1	Traditional Herbal Isolate=flavocommelitin	-6.6
7722	O=C1/C(=C(/[O-])\C=C\c2ccc(O)cc2)/C([O-])=C([C@H]2[C@H](O)[C@@H](O)[C@H](O)[C@H](CO)O2)C(=O)[C@]1(O)[C@@H]1[C@H](O)[C@@H](O)[C@H](O)[C@H](CO)O1	Traditional Herbal Isolate=safflomin a	-6.6
7723	O=C1/C(=C(/[O-])\C=C\c2ccc(O)cc2)/C([O-])=C([C@H]2[C@H](O)[C@@H](O)[C@H](O)[C@H](CO)O2)C(=O)[C@@]1(O)[C@@H]1[C@H](O)[C@@H](O)[C@H](O)[C@H](CO)O1	Traditional Herbal Isolate=safflomin a	-6.6
7729	O(C)c1c(OC)cc2c3[C@H]([N+@H](C)CC2)Cc2ccc(Oc4c(O)ccc(c4)C[C@H]4[N+@H](C)CCc5c4cc(c(OC)c5)Oc13)cc2	Traditional Herbal Isolate=oxycanthine	-6.6
7734	O(C)c1c(O)c2Oc3c(OC)cc4c([C@H]([N+@@H](C)CC4)Cc4cc(c(OC)cc4)Oc4ccc(cc4)C[C@H]4[N+@H](C)CCc(c24)c1)c3	Traditional Herbal Isolate=homoaromoline	-6.6
7742	O(C)c1c(O)c2Oc3ccc(cc3)C[C@@H]3[N+@@H](C)CCc4c3cc(c(OC)c4)Oc3c(OC)ccc(c3)C[C@@H]3[N+@H](C)CCc(c23)c1	Traditional Herbal Isolate=hayatinine	-6.6
7746	O(C)c1c(O)c2Oc3ccc(cc3)C[C@@H]3[N+@@H](C)CCc4c3cc(c(OC)c4)Oc3c(OC)ccc(c3)C[C@H]3[N+@@H](C)CCc(c23)c1	Traditional Herbal Isolate=hayatinine	-6.6
7763	O(C)c1c(O)c2Oc3ccc(cc3)C[C@H]3[N+@H](C)CCc4c3cc(c(OC)c4)Oc3c(OC)ccc(c3)C[C@H]3[N+@@H](C)CCc(c23)c1	Traditional Herbal Isolate=hayatidine	-6.6
7764	O(C)c1c(O)c2Oc3ccc(cc3)C[C@H]3[N+@@H](C)CCc4c3cc(c(OC)c4)Oc3c(OC)ccc(c3)C[C@H]3[N+@@H](C)CCc(c23)c1	Traditional Herbal Isolate=hayatidine	-6.6
7826	O([C@H](C)[C@@]1(O)[C@]2(C)[C@@H](OC(=O)/C=C/c3ccccc3)C[C@@H]3[C@@](O)([C@@]2(O)CC1)CC=C1[C@]3(C)CC[C@@H](O)C1)C(=O)c1cnccc1	Traditional Herbal Isolate=gagaminin	-6.6
7865	O(C)c1c(OC)cc2c3[C@@H]([N+@H](C)CC2)Cc2cc(c(OC)cc2)Oc2ccc(cc2)C[C@H]2[N+@H](C)CCc4c2cc(c(OC)c4)Oc13	Traditional Herbal Isolate=tetrandrine	-6.6
7866	O(C)c1c(OC)cc2c3[C@@H]([N+@@H](C)CC2)Cc2cc(c(OC)cc2)Oc2ccc(cc2)C[C@H]2[N+@H](C)CCc4c2cc(c(OC)c4)Oc13	Traditional Herbal Isolate=tetrandrine	-6.6
7874	O(C)c1c(OC)cc2c3[C@H]([N+@@H](C)CC2)Cc2cc(c(OC)cc2)Oc2ccc(cc2)C[C@@H]2[N+@@H](C)CCc4c2cc(c(OC)c4)Oc13	Traditional Herbal Isolate=d-tetrandrine;iso-sinomenine;iso-tetrandrine	-6.6
7941	O=C(OCC1(COC(=O)c2cnccc2)C(O)C(COC(=O)c2cnccc2)(COC(=O)c2cnccc2)CCC1)c1cnccc1	NPC Approved Name=nicomol	-6.6
7946	O(C)c1c(OC)cc2[C@@H]3[N+@H](C)CCc2c1Oc1c(OC)c(OC)c2c([C@@H]([N+@H](C)CC2)Cc2cc(c(O)cc2)Oc2ccc(cc2)C3)c1	Traditional Herbal Isolate=thalfoetidine	-6.6
7952	S(CC1=C(C(=O)[O-])N2C(=O)[C@H](NC(=O)[C@H](NC(=O)N3C(=O)C(=O)N(CC)CC3)c3ccc(O)cc3)[C@H]2SC1)c1n(C)nnn1	China Approved Name=cefoperazone Indian Approved Name=cefoperazone	-6.6
7998	O(C)c1c(-c2c(OC)cc(O)c3c2C[C@H]2[N+@@H](C)CCC43[C@H]2C=C(OC)C(=O)C4)c2c(c(O)c1)C13[C@@H]([C@@H]([N+@@H](C)CC1)C2)C=C(OC)C(=O)C3	Traditional Herbal Isolate=disinomenine	-6.6
8004	O(C)c1c(-c2c(OC)cc(O)c3c2C[C@H]2[N+@H](C)CCC43[C@@H]2C=C(OC)C(=O)C4)c2c(c(O)c1)C13[C@H]([C@@H]([N+@H](C)CC1)C2)C=C(OC)C(=O)C3	Traditional Herbal Isolate=disinomenine	-6.6
8036	O(C)c1c(OC)cc2[C@H]3[N+@@H](C)CCc2c1Oc1c2OCOc2c(OC)c2c1[C@@H]([N+@@H](C)CC2)Cc1ccc(Oc2c(OC)ccc(c2)C3)cc1	Traditional Herbal Isolate=thalphinine	-6.6
8050	O(C)c1c(OC)cc2[C@@H]3[N+@@H](C)CCc2c1Oc1c2OCOc2c(OC)c2c1[C@H]([N+@H](C)CC2)Cc1ccc(Oc2c(OC)ccc(c2)C3)cc1	Traditional Herbal Isolate=thalphinine	-6.6
8071	O(C)c1ccc(C2=C(OC[C@@H]3[C@H](O)[C@H](O)[C@H](O)[C@@H](C)O3)C(=O)c3c(c(C/C=C(\C)/C)c(O[C@H]4[C@@H](O)[C@H](O)[C@H](O)[C@H](CO)O4)cc3)O2)cc1	Traditional Herbal Isolate=icariine	-6.6
8082	O=C(OC[C@H]1[C@H](O)[C@H](O)[C@@H](O)[C@H](OCCc2ccc(O)cc2)O1)C[C@H]1/C(=C/C)/[C@H](O[C@H]2[C@@H](O)[C@H](O)[C@H](O)[C@H](CO)O2)OC=C1C(=O)OC	Traditional Herbal Isolate=nuzhenide	-6.6
8191	O=C[C@@]12[C@@](O)(C[C@@H](O[C@H]3[C@H](O)[C@@H](O)[C@@H](O[C@H]4[C@H](O)[C@H](O)[C@H](O)[C@H](CO)O4)[C@@H](C)O3)CC1)CC[C@@H]1[C@@]3(O)[C@@](C)([C@@H](C4=COC(=O)C=C4)CC3)CC[C@H]21	Traditional Herbal Isolate=hellebrin	-6.6
8195	O=C[C@]12[C@@](O)(C[C@@H](O[C@H]3[C@@H](O)[C@@H](O)[C@H](O[C@@H]4[C@@H](O)[C@@H](O)[C@@H](O)[C@H](CO)O4)[C@H](C)O3)CC1)CC[C@@H]1[C@]3(O)[C@@](C)([C@@H](C4=COC(=O)C=C4)CC3)CC[C@H]21	Traditional Herbal Isolate=hellebrin	-6.6
8198	O=C[C@@]12[C@@](O)(C[C@@H](O[C@H]3[C@@H](O)[C@H](O)[C@H](O[C@@H]4[C@@H](O)[C@@H](O)[C@H](O)[C@@H](CO)O4)[C@H](C)O3)CC1)CC[C@H]1[C@]3(O)[C@](C)([C@H](C4=COC(=O)C=C4)CC3)CC[C@@H]21	Traditional Herbal Isolate=hellebrin	-6.6
8200	O=C[C@@]12[C@](O)(C[C@H](O[C@H]3[C@@H](O)[C@H](O)[C@@H](O[C@H]4[C@@H](O)[C@H](O)[C@@H](O)[C@H](CO)O4)[C@@H](C)O3)CC1)CC[C@@H]1[C@@]3(O)[C@@](C)([C@@H](C4=COC(=O)C=C4)CC3)CC[C@@H]21	Traditional Herbal Isolate=hellebrin	-6.6
8218	Clc1c(OC)cc2cc1N(C)C(=O)C[C@H](OC(=O)[C@@H](N(C(=O)CC(C)C)C)C)[C@]1(C)O[C@H]1[C@@H](C)C1OC(=O)NC(O)([C@@H](OC)/C=C/C=C(/C)\C2)C1	Traditional Herbal Isolate=maytanvaline	-6.6
8229	Clc1c(OC)cc2cc1N(C)C(=O)C[C@@H](OC(=O)[C@H](N(C(=O)CC(C)C)C)C)[C@@]1(C)O[C@@H]1[C@H](C)C1OC(=O)NC(O)([C@H](OC)/C=C/C=C(/C)\C2)C1	Traditional Herbal Isolate=maytanvaline	-6.6
8307	O=C(N[C@H]1[C@@H](O[C@@H]2[C@@H](O)[C@H](O)[C@@H](O)[C@@H](C(=O)[O-])O2)[C@H](O)[C@H](CO)O[C@H]1O[C@@H]1[C@@H](O)[C@H](O)[C@H](O[C@H]2[C@H](O)[C@H](CO)O[C@H](O)[C@@H]2NC(=O)C)O[C@H]1C(=O)[O-])C	Indian Approved Name=hyaluronic acid	-6.6
8339	O([C@H]1[C@@H](O)[C@H](O)[C@H](O)[C@H](CO)O1)[C@H]1[C@H]([C@@H](CC/C=C(\C)/C)C)[C@]2(C)[C@](C)([C@@H]3[C@]4([C@@]5(C(C(C)(C)[C@@H](O[C@H]6[C@@H](O)[C@@H](O)[C@@H](O)[C@H](CO)O6)CC5)C(=O)C3)C4)CC2)C1	Traditional Herbal Isolate=diadzin-4 7-diglucoside	-6.6
8347	O([C@@H]1[C@H](O)[C@@H](O)[C@H](O)[C@@H](CO)O1)[C@H]1[C@H]([C@@H](CC/C=C(\C)/C)C)[C@]2(C)[C@@](C)([C@@H]3[C@]4([C@@]5(C(C(C)(C)[C@@H](O[C@H]6[C@@H](O)[C@@H](O)[C@@H](O)[C@H](CO)O6)CC5)C(=O)C3)C4)CC2)C1	Traditional Herbal Isolate=diadzin-4 7-diglucoside	-6.6
8348	O([C@@H]1[C@@H](O)[C@@H](O)[C@@H](O)[C@H](CO)O1)[C@H]1[C@H]([C@@H](CC/C=C(\C)/C)C)[C@]2(C)[C@@](C)([C@@H]3[C@]4([C@@]5(C(C(C)(C)[C@@H](O[C@@H]6[C@H](O)[C@H](O)[C@@H](O)[C@@H](CO)O6)CC5)C(=O)C3)C4)CC2)C1	Traditional Herbal Isolate=diadzin-4 7-diglucoside	-6.6
8375	P(=O)(O[C@H](C(=O)[O-])CCC(=O)[O-])(OC[C@H]1[C@@H](O)[C@H](O)[C@@H](OC[C@H](O)[C@@H](O)[C@@H](O)Cc2ccc(N[C@H](C)[C@H]3N(C=O)[C@@H]4C(=O)[N+H]=C(N)NC4=[N+H][C@@H]3C)cc2)O1)[O-]	Indian Approved Name=alpha lipioic acid	-6.6
8462	O(C)[C@H]1[C@H](O)[C@H](O[C@@H]2[C@H](C)O[C@@H](O[C@H]3[C@H](C)O[C@H](O[C@@H]4C[C@@H]5[C@@](C)([C@@H]6[C@](O)([C@@]7(O)[C@](C)([C@H](O)C6)[C@@](O)([C@@H](O)C)CC7)CC5)CC4)C[C@H]3OC)C[C@@H]2OC)O[C@H](C)[C@H]1O	Traditional Herbal Isolate=tenacissoside a	-6.6
8480	O=C(O[C@@H]1[C@@H](O)[C@@H](O)[C@@H](O)[C@H](CO)O1)[C@@]1(C)[C@H](O)[C@H](O)C[C@@]2(C)[C@@H]3[C@@](C)([C@@]4(CO)C([C@H]5[C@@](C(=O)O[C@H]6[C@@H](O)[C@@H](O)[C@H](O)[C@@H](CO)O6)(CC4)CCC(C)(C)C5)=CC3)CC[C@H]12	Traditional Herbal Isolate=prosapogenin	-6.6
8487	O=C(O[C@@H]1[C@H](O)[C@@H](O)[C@@H](O)[C@H](CO)O1)[C@@]1(C)[C@@H](O)[C@H](O)C[C@@]2(C)[C@H]3[C@](C)([C@@]4(CO)C([C@H]5[C@](C(=O)O[C@@H]6[C@@H](O)[C@@H](O)[C@@H](O)[C@H](CO)O6)(CC4)CCC(C)(C)C5)=CC3)CC[C@@H]12	Traditional Herbal Isolate=prosapogenin	-6.6
8500	O=CC[C@@H]1[C@H](O[C@H]2[C@H](O)[C@H]([N+H](C)C)[C@@H](O[C@@H]3O[C@@H](C)[C@@H](O)[C@](O)(C)C3)[C@H](C)O2)[C@@H](OC)[C@H](O)CC(=O)O[C@@H](C)C/C=C/C=C/[C@@H](O[C@@H]2O[C@@H](C)[C@H]([N+H](C)C)CC2)[C@H](C)C1	Indian Approved Name=spiramycin	-6.6
8506	O=CC[C@@H]1[C@H](O[C@@H]2[C@@H](O)[C@@H]([N+H](C)C)[C@@H](O[C@@H]3O[C@@H](C)[C@H](O)[C@](O)(C)C3)[C@H](C)O2)[C@@H](OC)[C@H](O)CC(=O)O[C@H](C)C/C=C/C=C/[C@@H](O[C@@H]2O[C@H](C)[C@H]([N+H](C)C)CC2)[C@H](C)C1	Indian Approved Name=spiramycin	-6.6
8514	O=C(O[C@@H]1C(C)=C2[C@@H](OC(=O)C)C(=O)[C@@]3(C)[C@H](O)C[C@@H]4[C@@](OC(=O)C)([C@H]3[C@H](OC(=O)c3ccccc3)[C@@](O)(C2(C)C)C1)CO4)[C@H](O)[C@H](NC(=O)c1ccccc1)c1ccccc1	Indian Approved Name=paclitaxel WHO Essential Medicine=paclitaxel Australia Approved Name=NAB PACLITAXEL;PACLITAXEL Traditional Herbal Isolate=taxol FDA Approved Drug=PACLITAXEL	-6.6
8599	O=C([O-])[C@@H]1[C@H](O[C@H]2[C@@H](O)[C@@H](O)[C@@H](CO)O2)[C@@H](O)[C@H](O)[C@@H](O[C@H]2C(C)(C)[C@H]3[C@@](C)([C@H]4[C@](C)([C@@]5(C)C([C@H]6[C@@](C(=O)O[C@H]7[C@@H](O)[C@H](O)[C@H](O)[C@H](CO)O7)(CC5)CCC(C)(C)C6)=CC4)CC3)CC2)O1	Traditional Herbal Isolate=araloside a	-6.6
8620	O=C(OCCCCCOC(=O)CC[N+@]1(C)[C@H](Cc2cc(OC)c(OC)cc2)c2c(cc(OC)c(OC)c2)CC1)CC[N+@]1(C)[C@@H](Cc2cc(OC)c(OC)cc2)c2c(cc(OC)c(OC)c2)CC1	China Approved Name=atracurium WHO Essential Medicine=atracurium Indian Approved Name=atracurium besylate FDA Approved Drug=ATRACURIUM BESYLATE	-6.6
8668	O=C(O[C@@H]1[C@H](O)[C@H](O)[C@@H](O)[C@@H](CO[C@@H]2[C@H](O)[C@H](O)[C@@H](O[C@H]3[C@H](O)[C@H](O)[C@H](O)[C@@H](C)O3)[C@@H](CO)O2)O1)[C@@]12[C@H]([C@@H](C)[C@@H](C)CC1)C=1[C@](C)([C@]3(C)[C@@H]([C@]4(C)[C@@H]([C@@H](O)C3)[C@](CO)(C)[C@H](O)[C@@H](O)C4)CC=1)CC2	Traditional Herbal Isolate=madecassoside	-6.6
8689	O=C(NCC(=O)N)[C@H](NC(=O)[C@@H]1N(C(=O)[C@@H]2NC(=O)[C@H](CC(=O)N)NC(=O)[C@H]([C@H](O)C)NC(=O)[C@@H]([C@H](CC)C)NC(=O)[C@H](Cc3ccc(O)cc3)NC(=O)[C@@H]([N+H3])CSSC2)CCC1)CC(C)C	Indian Approved Name=urofollitrophin FDA Approved Drug=UROFOLLITROPIN	-6.6
8711	O=C(N[C@@H]1C(=O)N[C@H](Cc2ccccc2)C(=O)N[C@@H](Cc2c3c([nH]c2)cccc3)C(=O)N[C@@H](CCCC[N+H3])C(=O)N[C@H]([C@@H](O)C)C(=O)N[C@@H](C(=O)N[C@H]([C@@H](O)C)CO)CSSC1)[C@@H]([N+H3])Cc1ccccc1	Indian Approved Name=octreotide FDA Approved Drug=OCTREOTIDE ACETATE	-6.6
8729	O=C(N[C@H]1[C@@H](O)[C@H](O[C@H]2[C@H](O[C@H]3[C@@H](O)[C@H](O)[C@@H](O)CO3)[C@H](O)[C@H](O)[C@H](CO[C@@H]3[C@H](O)[C@H](O)[C@H](O)[C@H](CO)O3)O2)[C@H](CO)O[C@H]1O[C@H]1[C@@H](O[C@H]2[C@@H](O)[C@H](O)[C@@H](O)[C@@H](C)O2)[C@@H](NC(=O)C)[C@H](O)O[C@H]1CO)C	Indian Approved Name=bromelain	-6.6
8742	O([C@@H]1[C@H](O)[C@@H](O)[C@H](O[C@H]2CC=3[C@@](C)([C@@H]4[C@@H]([C@]5(O)[C@](C)([C@@H]6[C@@H](C)C7(O[C@@H]6C5)OC[C@@H](C)CC7)CC4)CC=3)CC2)O[C@H]1CO)[C@H]1[C@@H](O[C@@H]2[C@H](O)[C@H](O)[C@H](O)[C@@H](CO)O2)[C@H](O[C@@H]2[C@@H](O)[C@@H](O)[C@H](O)CO2)[C@H](O)[C@H](CO)O1	Traditional Herbal Isolate=steroidal saponin pod-ii	-6.6
8752	O([C@H]1[C@H](O)[C@H](O)[C@H](O[C@@H]2CC=3[C@](C)([C@H]4[C@H]([C@@]5(O)[C@](C)([C@H]6[C@@H](C)C7(O[C@@H]6C5)OC[C@@H](C)CC7)CC4)CC=3)CC2)O[C@H]1CO)[C@@H]1[C@@H](O[C@H]2[C@H](O)[C@@H](O)[C@H](O)[C@@H](CO)O2)[C@@H](O[C@H]2[C@H](O)[C@@H](O)[C@H](O)CO2)[C@@H](O)[C@H](CO)O1	Traditional Herbal Isolate=steroidal saponin pod-ii	-6.6
8756	O([C@@H]1[C@H](O)[C@@H](O)[C@H](O[C@H]2CC=3[C@@](C)([C@H]4[C@H]([C@]5(O)[C@@](C)([C@@H]6[C@@H](C)C7(O[C@H]6C5)OC[C@@H](C)CC7)CC4)CC=3)CC2)O[C@@H]1CO)[C@@H]1[C@@H](O[C@@H]2[C@@H](O)[C@@H](O)[C@H](O)[C@H](CO)O2)[C@H](O[C@@H]2[C@H](O)[C@H](O)[C@H](O)CO2)[C@@H](O)[C@H](CO)O1	Traditional Herbal Isolate=steroidal saponin pod-ii	-6.6
8811	O=C([O-])[C@H]1[C@H](O)CC2(O)OC1C[C@H](O[C@@H]1[C@@H](O)[C@@H]([N+H3])[C@@H](O)[C@H](C)O1)C=CC=CC=CC=CC=CC=CC=C[C@H](C)[C@@H]([C@@H](C[C@@H]([C@H](O)CC(=O)c1ccc(N)cc1)C)C)OC(=O)CC(=O)CCCC(=O)C[C@@H](O)C[C@@H](O)C[C@H](O)C2	FDA Approved Drug=CANDICIDIN	-6.6
8822	O=C(O[C@H]1[C@@H](OC(=O)C)[C@@]2(CO)[C@H](O)C[C@]3(C)[C@]4(C)[C@@H]([C@]5(C)[C@H]([C@](CO)(C)[C@H](O[C@H]6[C@H](O[C@@H]7[C@@H](O)[C@@H](O)[C@@H](O)[C@@H](CO)O7)[C@@H](O)[C@H](O[C@H]7[C@@H](O)[C@H](O)[C@H](O)[C@@H](CO)O7)[C@H](C(=O)[O-])O6)CC5)CC4)CC=C3[C@H]2CC1(C)C)/C(=C/C)/C	Traditional Herbal Isolate=triterpene glycosides	-6.6
8876	O([C@H](C)c1c(C)[cH0]=2[nH][cH0]1=Cc1c(C)c([C@H](O)C)c([nH]1)C=C1C(C)=C(CCC(=O)[O-])C(=N1)C=C1C(CCC(=O)[O-])=C(C)C(=N1)C=2)[C@H](C)c1c(C)[cH0]=2[nH][cH0]1=CC=1C(C)=C(CCC(=O)[O-])C(N=1)=CC=1C(CCC(=O)[O-])=C(C)C(N=1)=Cc1c(C)c([C@@H](O)C)c([nH]1)C=2	FDA Approved Drug=PORFIMER SODIUM	-6.6
8879	O([C@@H](C)c1c(C)[cH0]=2[nH][cH0]1=Cc1c(C)c([C@@H](O)C)c([nH]1)C=C1C(C)=C(CCC(=O)[O-])C(=N1)C=C1C(CCC(=O)[O-])=C(C)C(=N1)C=2)[C@H](C)c1c(C)[cH0]=2[nH][cH0]1=CC=1C(C)=C(CCC(=O)[O-])C(N=1)=CC=1C(CCC(=O)[O-])=C(C)C(N=1)=Cc1c(C)c([C@@H](O)C)c([nH]1)C=2	FDA Approved Drug=PORFIMER SODIUM	-6.6
8962	O=C(NNC(=O)[C@@H]1N(C(=O)[C@H](NC(=O)[C@H](NC(=O)[C@H](NC(=O)[C@@H](NC(=O)[C@@H](NC(=O)[C@H](NC(=O)[C@H](NC(=O)[C@H]2NC(=O)CC2)Cc2[nH]cnc2)Cc2c3c([nH]c2)cccc3)CO)Cc2ccc(O)cc2)COC(C)(C)C)CC(C)C)CCC/[N+H]=C(\N)/N)CCC1)N	FDA Approved Drug=GOSERELIN ACETATE	-6.6
8966	P(=O)(O[C@H](CNC(=O)CC[C@]1(C)[C@H](CC(=O)N)[C@@H]2[C@]3(C)[C@@](CC(=O)N)(C)[C@@H](CCC(=O)N)C(/C(/C)=C\4/[C@](CC(=O)N)(C)[C@@H](CCC(=O)N)/C(/N/4)=C\C=4C(C)(C)[C@H](CCC(=O)N)/C(=C(\C)/C1=N2)/N=4)=N3)C)(O[C@H]1[C@H](O)[C@H](n2c3c(nc2)cc(C)c(C)c3)O[C@H]1CO)[O-]	FDA Approved Drug=CYANOCOBALAMIN CO-60	-6.6
8967	P(=O)(O[C@H](CNC(=O)CC[C@]1(C)[C@H](CC(=O)N)[C@H]2[C@]3(C)[C@@](CC(=O)N)(C)[C@@H](CCC(=O)N)C(/C(/C)=C\4/[C@](CC(=O)N)(C)[C@@H](CCC(=O)N)/C(/N/4)=C\C=4C(C)(C)[C@H](CCC(=O)N)/C(=C(\C)/C1=N2)/N=4)=N3)C)(O[C@H]1[C@H](O)[C@H](n2c3c(nc2)cc(C)c(C)c3)O[C@H]1CO)[O-]	FDA Approved Drug=CYANOCOBALAMIN CO-60	-6.6
8978	O=C([O-])[C@H](NC(=O)[C@H]1N(C(=O)[C@H]2N(C(=O)[C@@H](NC(=O)[C@@H](NC(=O)CNC(=O)[C@H]3N(C(=O)[C@@H]4N(C(=O)[C@@H](NC(=O)[C@H]([N+H3])CCC/[N+H]=C(\N)/N)CCC/[N+H]=C(\N)/N)CCC4)C[C@H](O)C3)Cc3sccc3)CO)Cc3c(cccc3)C2)[C@@H]2[C@H](C1)CCCC2)CCC/[N+H]=C(\N)/N	FDA Approved Drug=ICATIBANT ACETATE	-6.6
9000	O=C(N[C@H](C(=O)N[C@H](C(=O)N[C@H](C(=O)N[C@@H](C(=O)N1[C@H](C(=O)NCC(=O)N)CCC1)CCCNC(=[N+H2])N)CC(C)C)Cc1cc2c(cc1)cccc2)Cc1ccc(O)cc1)[C@@H](NC(=O)[C@H](NC(=O)[C@H](NC(=O)[C@H]1NC(=O)CC1)Cc1nc[nH]c1)Cc1c2c([nH]c1)cccc2)CO	Indian Approved Name=nafarelin FDA Approved Drug=NAFARELIN ACETATE	-6.6
9096	O=C(O[C@@H]1[C@@H](C=O)OC(=O)c2c(c(O)c(O)c(O)c2)Oc2c(O)c(O)c3-c4c(O)c(O)c(O)cc4C(=O)O[C@@H]4[C@@H](OC(=O)c5cc(O)c(O)c(O)c5)C([C@H](OC(=O)c5cc(O)c(O)c(O)c5)O[C@H]4COC(=O)c3c2)OC(=O)c2c(c(O)c(O)c(O)c2)Oc2c(O)c(O)c3-c4c(O)c(O)c(O)cc4C(=O)OC[C@@H](O)C1OC(=O)c3c2)c1cc(O)c(O)c(O)c1	Traditional Herbal Isolate=woodfordin a	-6.6
9120	O=C(OC)[C@H]1NC(=O)C2[C@H](O[C@@H]3O[C@H](C)[C@@H](O)[C@@H]([N+H3])C3)c3ccc(Oc4c(O[C@H]5[C@H](O[C@@H]6[C@H](O[C@@H]7[C@@H](O)[C@@H](O)[C@H](O)CO7)[C@H](O)[C@@H](O)[C@@H](CO)O6)[C@@H](O)[C@@H](O)[C@@H](CO[C@@H]6[C@@H](O)[C@H](O)[C@@H](O)[C@H](C)O6)O5)c5Oc6ccc([C@H](O)C7C(=O)N[C@@H](C(=O)N[C@@H](C(=O)N[C@@H](C(=O)N2)c2cc(c(O)cc2)-c2c(O[C@@H]8[C@@H](O)[C@H](O)[C@H](O)[C@H](CO)O8)cc(O)cc12)c(c4)c5)c1…	Traditional Herbal Isolate=agglutinins	-6.6
1649	Fc1c(-c2ccccc2)ccc([C@@H](C(=O)[O-])C)c1	NPC Approved Name=esflurbiprofen	-6.5
1650	Fc1c(-c2ccccc2)ccc([C@@H](C(=O)[O-])C)c1	Indian Approved Name=flurbiprofen;flubiprofen sodium FDA Approved Drug=FLURBIPROFEN;FLURBIPROFEN SODIUM	-6.5
1821	O=C1C(C#N)=CC(=C(C)N1)C1=Cn2c(ncc2)C=C1	NPC Approved Name=olprinone	-6.5
1855	O=C1c2c([O-])cc(O)cc2OC(c2ccccc2)=C1	Traditional Herbal Isolate=chrysin	-6.5
1871	O=C([O-])[C@H]1c2n(c(C(=O)c3ccccc3)cc2)CC1	Indian Approved Name=ketorolac FDA Approved Drug=KETOROLAC TROMETHAMINE	-6.5
1929	O=C1[C@@H](N2C(=O)c3c(C2=O)cccc3)CCC(=O)N1	Australia Approved Name=THALIDOMIDE FDA Approved Drug=THALIDOMIDE	-6.5
2129	O=C1C(c2ccc(O)cc2)=COc2c1c([O-])cc(O)c2	Indian Approved Name=genistein	-6.5
2371	C(=C\C[N+H]1CCCC1)(\c1ncccc1)/c1ccc(C)cc1	China Approved Name=triprolidine Indian Approved Name=triprolidine hcl FDA Approved Drug=TRIPROLIDINE HYDROCHLORIDE	-6.5
2457	O[C@@]1(C#C)[C@@]2(C)[C@@H]([C@H]3[C@H]([C@@H]4C(=CCCC4)CC3)CC2)CC1	Indian Approved Name=lynestrenol	-6.5
2463	O=C1c2c([O-])c(O)c(O)cc2OC(c2ccc(O)cc2)=C1	Traditional Herbal Isolate=scutellarein heteroside	-6.5
2464	O(C)c1ccc([C@H]2Oc3c(c([O-])cc(O)c3)C(=O)C2)cc1	Traditional Herbal Isolate=iso-sakuranetin	-6.5
2477	Clc1ccc([C@@]2(O)N3C(=[N+H]CC3)c3c2cccc3)cc1	US Illegal/Scheduled Drug (Schedule 4)=Mazindol FDA Approved Drug=MAZINDOL	-6.5
2504	Fc1c(C2=NCC(=O)N(C)c3n(C)nc(C)c23)cccc1	NPC Approved Name=zolazepam	-6.5
2521	Clc1cc2C(c3ccccc3)=N[C@@H](O)C(=O)Nc2cc1	Indian Approved Name=oxazepam US Illegal/Scheduled Drug (Schedule 4)=Oxazepam Australia Approved Name=OXAZEPAM FDA Approved Drug=OXAZEPAM	-6.5
2596	O[C@@H]1[C@H](c2ccc(O)cc2)Oc2c([C@@H]1O)c(O)cc(O)c2	Traditional Herbal Isolate=leucopelargonidin	-6.5
2655	C[N+H]1CC/C(=C\2/c3ncccc3CCc3c/2cccc3)/CC1	FDA Approved Drug=AZATADINE MALEATE	-6.5
2689	O([C@H]1[C@H](O)C(=O)[C@H](O)[C@H](CO)O1)c1c2c([nH]c1)cccc2	Traditional Herbal Isolate=indoxyl-5-ketogluconate	-6.5
2719	Clc1cc2C(c3ccccc3)=NCc3n(-c2cc1)cnn3	US Illegal/Scheduled Drug (Schedule 4)=Estazolam FDA Approved Drug=ESTAZOLAM	-6.5
2725	O([C@H]1[C@@H](O)[C@H](O)[C@H](O)[C@H](CO)O1)c1c2c([nH]c1)cccc2	Traditional Herbal Isolate=indican	-6.5
2726	O=C(OC)Nc1[nH]c2c(n1)cc(C(=O)c1ccccc1)cc2	FDA Approved Drug=MEBENDAZOLE	-6.5
2811	O=C1C=C2[C@@H]([C@H]3[C@H]([C@@H]4[C@](C)([C@@](O)(C#C)CC4)CC3)CC2)CC1	China Approved Name=norethisterone Indian Approved Name=norethisterone;norethindrone acetate WHO Essential Medicine=norethisterone Australia Approved Name=NORETHISTERONE FDA Approved Drug=NORETHINDRONE	-6.5
2841	O=C1C=C2[C@](C)([C@@H]3[C@@H]([C@@H]4[C@@](C)(OC(=O)CC4)CC3)CC2)C=C1	FDA Approved Drug=TESTOLACTONE	-6.5
2957	C(C)[N+@H]1[C@H](C)/C(=C\2/c3c(cccc3)CCc3c/2cccc3)/CC1	NPC Approved Name=piroheptine	-6.5
2958	C(C)[N+@@H]1[C@H](C)/C(=C\2/c3c(cccc3)CCc3c/2cccc3)/CC1	NPC Approved Name=piroheptine	-6.5
3032	S(=O)(=O)([O-])c1c(OC)cc(O)c(C(=O)c2ccccc2)c1	NPC Approved Name=2-hydroxy-4-methoxybenzophenone-5-sulfonic acid	-6.5
3037	S=C(Oc1cc2c(cc1)cccc2)N(C)c1cc(C)ccc1	Indian Approved Name=tolnaftate	-6.5
3078	Clc1cc([C@H](n2cncc2)c2cc3[nH]cnc3cc2)ccc1	NPC Approved Name=liarozole	-6.5
3079	O=C1Oc2c(c(O)cc3OC(C)(C)C=Cc23)-c2c1c([O-])ccc2	Traditional Herbal Isolate=sarolactone	-6.5
3106	O(C)c1cc2c([C@H]3[C@@H]([C@@H]4[C@](C)([C@@](O)(C#C)CC4)CC3)CC2)cc1	Indian Approved Name=ethinyl oestradiol Traditional Herbal Isolate=alpha-methyl ether Australia Approved Name=MESTRANOL FDA Approved Drug=MESTRANOL	-6.5
3107	O=C1C=C2C(=C3[C@H]([C@@H]4[C@](C)([C@@](O)(CC=C)CC4)C=C3)CC2)CC1	NPC Approved Name=altrenogest	-6.5
3153	O=C1CC2=C([C@H]3[C@@H]([C@H](C)C2)[C@@H]2[C@@](C)([C@](O)(C#C)CC2)CC3)CC1	NPC Approved Name=tibolone	-6.5
3201	O=C1c2c([O-])c(C)c(O)c(C)c2O[C@H](c2cc(O)c(O)cc2)C1	Traditional Herbal Isolate=cyrtomin	-6.5
3282	O=C1O[C@H]2[C@H](O)C[C@H]3[C@@H]([N+@H](C)CC3)[C@@H]2c2c1cc1OCOc1c2	Traditional Herbal Isolate=clividine	-6.5
3341	O=C1C(C)(C)[C@H]2[C@@](C)([C@@H]3[C@@]4(C[C@](O)(CO)[C@@H](C4)CC3)CC2)CC1	Traditional Herbal Isolate=acyclic diterpene glycosides	-6.5
3480	O[C@@H]1[C@@H](CC)[C@H]2[C@@H]3[C@H](O)[C@@]45[C@@H](N(C)c6c4cccc6)[C@@H]([N+H]1[C@H]3C5)C2	Traditional Herbal Isolate=ajmaline	-6.5
3552	Fc1ccc([C@H]2[C@@H](COc3cc4OCOc4cc3)C[N+H2]CC2)cc1	Indian Approved Name=paroxetine FDA Approved Drug=PAROXETINE HYDROCHLORIDE;PAROXETINE MESYLATE	-6.5
3590	O=C(Nc1ncccc1)C=1N(C)S(=O)(=O)c2c(C=1O)cccc2	Indian Approved Name=piroxicam Australia Approved Name=PIROXICAM FDA Approved Drug=PIROXICAM	-6.5
3633	O=C1N2[C@@H]3C([C@@H]4/C(=C\CO)/C[N+H]5[C@@H](C3(c3c2cccc3)CC5)C4)=CC1	Traditional Herbal Isolate=isostrychnine	-6.5
3639	O=S1(=O)N(C)/C(=C(\[O-])/Nc2ncccc2)/C(=O)c2sccc12	Indian Approved Name=tenoxicam	-6.5
3655	O=C(OC)[C@@H]1C23[C@@H](C)C4([C@@H]5[N+H](CC=C4)CCC25c2c(N3)cccc2)C1	Traditional Herbal Isolate=vindolinine	-6.5
3699	Clc1c(S(=O)(=O)N)cc([C@@]2(O)NC(=O)c3c2cccc3)cc1	Indian Approved Name=chlorthalidone FDA Approved Drug=CHLORTHALIDONE	-6.5
3720	O(C)c1c(OC)cc2c([C@@H]3[N+H](Cc4c5OCOc5ccc4C3)CC2)c1	Traditional Herbal Isolate=sinactine	-6.5
3744	O[C@@H](C[C@H]1[N+H](C)[C@H](C[C@@H](O)c2ccccc2)CCC1)c1ccccc1	Traditional Herbal Isolate=lobelanidine	-6.5
3746	O[C@@H](C[C@@H]1[N+H](C)[C@H](C[C@H](O)c2ccccc2)CCC1)c1ccccc1	Traditional Herbal Isolate=lobelanidine	-6.5
3839	O=C1O[C@H](c2cocc2)C[C@]2(C)[C@@H]1CC(=O)[C@H]1[C@H]3C(=O)OC(C3)C[C@H]21	Traditional Herbal Isolate=diosbulbin	-6.5
3851	O=C1O[C@H](c2cocc2)C[C@]2(C)[C@@H]1CC(=O)[C@@H]1[C@@H]3C(=O)OC(C3)C[C@@H]21	Traditional Herbal Isolate=diosbulbin	-6.5
3866	O=C1O[C@]2(C)OC34[C@@H]5[C@@H]([C@]6(C)C(=CC5)C[C@H](O)CC6)CCC13[C@@H]2CC4	Traditional Herbal Isolate=adonilide	-6.5
3870	O=C1O[C@]2(C)OC34[C@H]5[C@@H]([C@@]6(C)C(=CC5)C[C@H](O)CC6)CCC13[C@H]2CC4	Traditional Herbal Isolate=adonilide	-6.5
3872	O=C1O[C@@]2(C)OC34[C@@H]5[C@@H]([C@@]6(C)C(=CC5)C[C@H](O)CC6)CCC13[C@@H]2CC4	Traditional Herbal Isolate=adonilide	-6.5
3879	O=C1O[C@@]2(C)OC34[C@H]5[C@@H]([C@@]6(C)C(=CC5)C[C@H](O)CC6)CCC13[C@H]2CC4	Traditional Herbal Isolate=adonilide	-6.5
3896	[N+H](C)(C)[C@H]1CC=2[C@@](C)([C@@H]3[C@H]([C@@H]4[C@]5([C@H]([C@H](C)[N+H2]C5)CC4)CC3)CC=2)CC1	Traditional Herbal Isolate=conessimine	-6.5
3897	[N+H](C)(C)[C@H]1CC=2[C@@](C)([C@@H]3[C@H]([C@@H]4[C@]5([C@H]([C@@H](C)[N+H2]C5)CC4)CC3)CC=2)CC1	Traditional Herbal Isolate=conessimine	-6.5
3905	[N+H](C)(C)[C@H]1CC=2[C@@](C)([C@@H]3[C@@H]([C@@H]4[C@]5([C@H]([C@@H](C)[N+H2]C5)CC4)CC3)CC=2)CC1	Traditional Herbal Isolate=conessimine	-6.5
3923	[N+H2](C)[C@H]1CC=2[C@@](C)([C@H]3[C@H]([C@@H]4C5(C([C@H](C)[N+@H](C)C5)CC4)CC3)CC=2)CC1	Traditional Herbal Isolate=isoconessimine	-6.5
4038	[N+H2](CCc1c(-c2ncc3c(c2)ccc2OCOc32)cc2OCOc2c1)C	Traditional Herbal Isolate=corydamine	-6.5
4084	O=C(C)N1[C@@H]2[C@H]3[C@@H](O)OCC=C4[C@H]3C[C@@H]3[N+H](C4)CCC23c2c1cccc2	Traditional Herbal Isolate=diaboline	-6.5
4091	O=C(C)N1[C@@H]2[C@@H]3[C@@H](O)OCC=C4[C@H]3C[C@H]3[N+H](C4)CCC23c2c1cccc2	Traditional Herbal Isolate=diaboline	-6.5
4093	O=C(C)N1[C@@H]2[C@@H]3[C@@H](O)OCC=C4[C@@H]3C[C@H]3[N+H](C4)CCC23c2c1cccc2	Traditional Herbal Isolate=diaboline	-6.5
4097	O=C(OC)C=1[C@H]2[C@@H]([C@@H](C)OC=1)C[N+H]1[C@H](c3[nH]c4c(c3CC1)cccc4)C2	China Approved Name=raubasine Traditional Herbal Isolate=ajmalicine;lupin alkaloid	-6.5
4104	O=C(Nc1c(CC[C@@H]2[N+@@H](C)CCCC2)cccc1)c1ccc(OC)cc1	NPC Approved Name=encainide	-6.5
4117	O=C1c2c(cc3OCOc3c2)CC[N+@@H](C)Cc2c3OCOc3ccc2C1	Traditional Herbal Isolate=biflorine	-6.5
4160	O[C@H]1[C@H](Cc2cc3OCOc3cc2)[C@@H](Cc2cc3OCOc3cc2)CO1	Traditional Herbal Isolate=cubebine;cubebin	-6.5
4210	[N+H](C)(C)[C@H]1CC=2[C@@](C)([C@@H]3[C@@H]([C@@H]4[C@]5([C@H]([C@@H](C)[N+@@H](C)C5)CC4)CC3)CC=2)CC1	Traditional Herbal Isolate=conessine;concuressine;conkurchine	-6.5
4217	Fc1c(C)c2C(=O)C(C(=O)[O-])=CN(C3CC3)c2cc1N1C[C@@H](C)[N+H2]CC1	FDA Approved Drug=GREPAFLOXACIN HYDROCHLORIDE	-6.5
4254	O=C(O[C@@H]1[C@H](O)[C@H]2C(=C)C(=O)O[C@@H]2[C@H]2C(C)=CC(=O)[C@@H]2[C@H]1C)/C(=C\C)/C	Indian Approved Name=azardirachta indica	-6.5
4292	O=C(O[C@H]1C[N+H]2[C@H]([C@@H]3C(=O)[C@H]([C@@H]4N(C(=O)CCC4)C3)C2)CC1)/C(=C/C)/C	Traditional Herbal Isolate=3â€²-angeloyloxy-4â€²-isovaleroyloxy	-6.5
4301	O(C)c1c2c3c([n+](C)cc2c2OCOc2c1)c1c(cc2OCOc2c1)cc3	Traditional Herbal Isolate=chelirubine	-6.5
4338	O=C1[C@H](O)[C@@H]2[C@@]3(C)C(=O)[C@H](O)C[C@@H](C)[C@@H]3C[C@@H]3[C@]2(C)[C@@H]([C@H]1C)CC(=O)O3	Traditional Herbal Isolate=amarolide	-6.5
4398	O(C)c1cc2c(N3C(=O)C[C@@H]4OCC=C5[C@@H]6[C@@H]4[C@H]3C32[C@H]([N+H](C5)CC3)C6)cc1	Traditional Herbal Isolate=beta- colubrine	-6.5
4423	O[C@H](C)[C@@]1(O)[C@]2(C)[C@@H](O)C[C@H]3[C@]4(C)C(=CC[C@H]3[C@]2(O)CC1)C[C@H](O)CC4	Traditional Herbal Isolate=utendin	-6.5
4505	Clc1cc2[C@@]3(c4ccccc4)OC(C)=CC(=O)N3CC(=O)N(C)c2cc1	US Illegal/Scheduled Drug (Schedule 4)=Ketazolam	-6.5
4514	O=C(OC)C=1[C@H]2[C@H]([C@@H](C)OC=1)C[N+H]1[C@@H]([C@]3(C(=O)Nc4c3cccc4)CC1)C2	Traditional Herbal Isolate=isopteropodine	-6.5
[truncated: 7,092 more rows]
