# Supplementary material
Source: publisher figshare collection journal article supplement (https://tandf.figshare.com/articles/dataset/_/12366461)

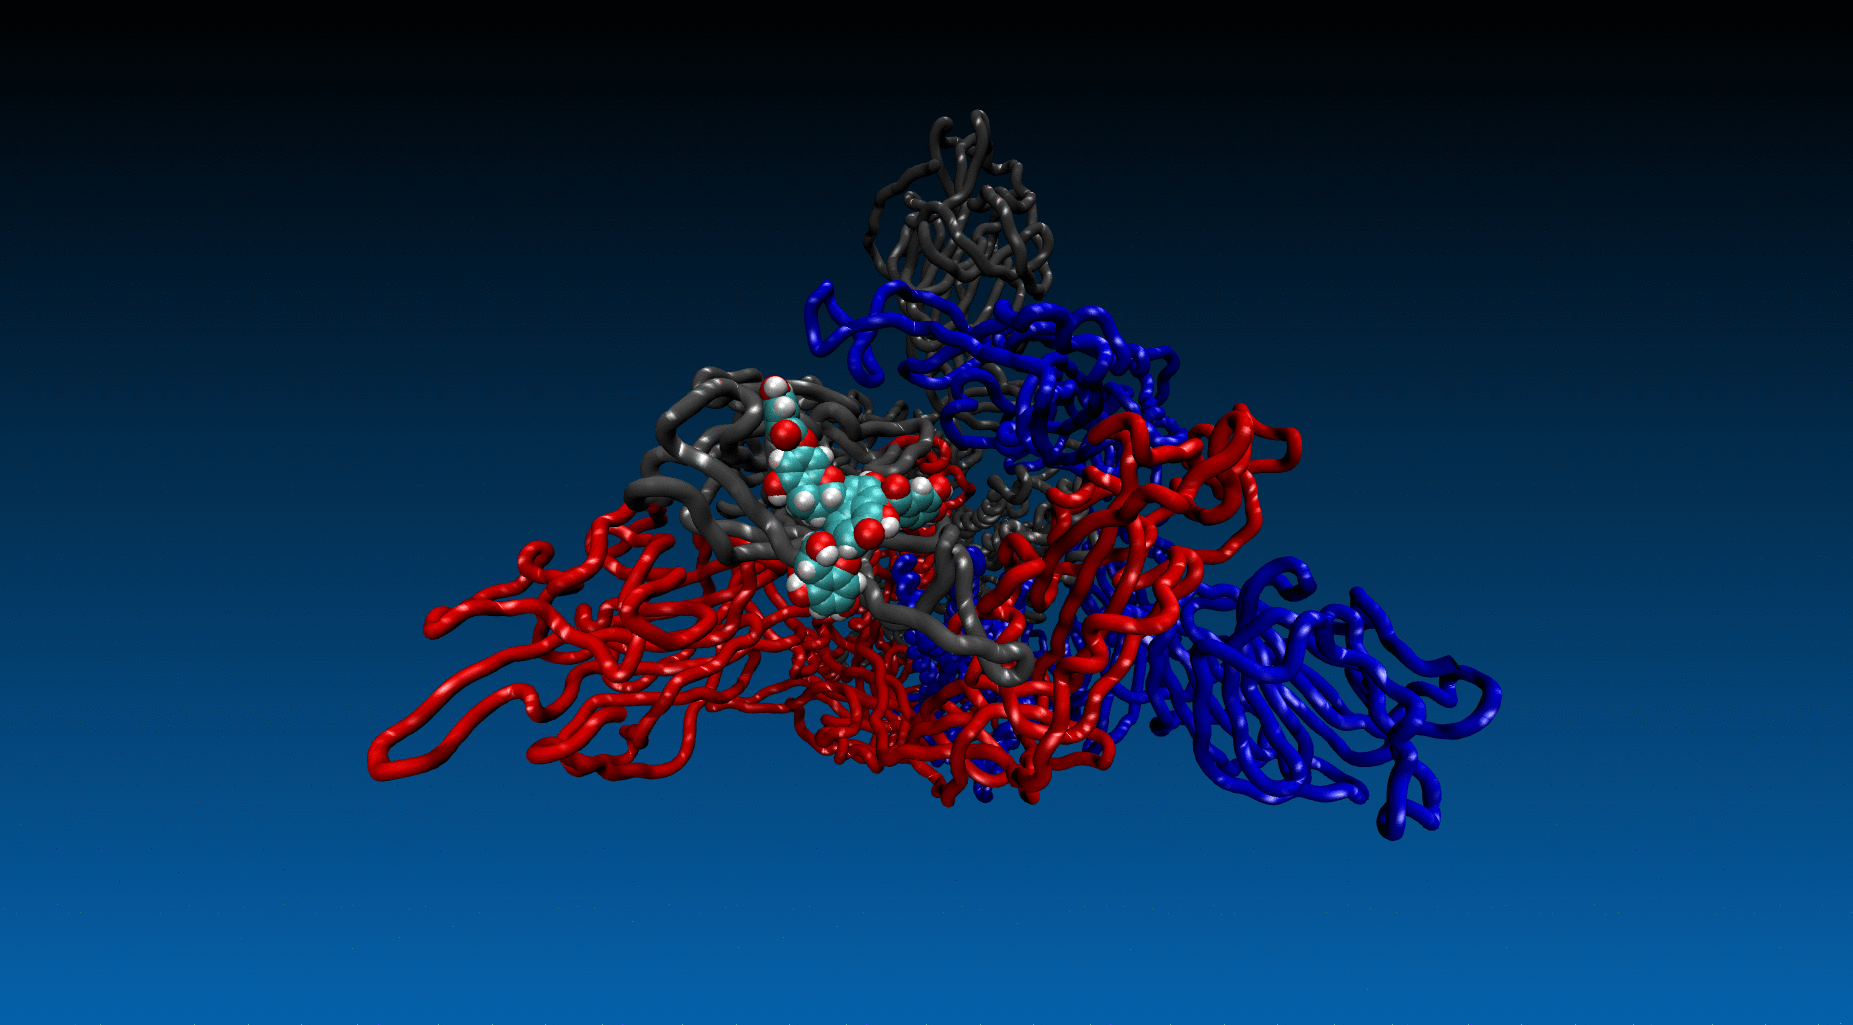

Supplement: Supplementary file 1 [file 2 › tbsd_a_1772885_sm0537.gif]

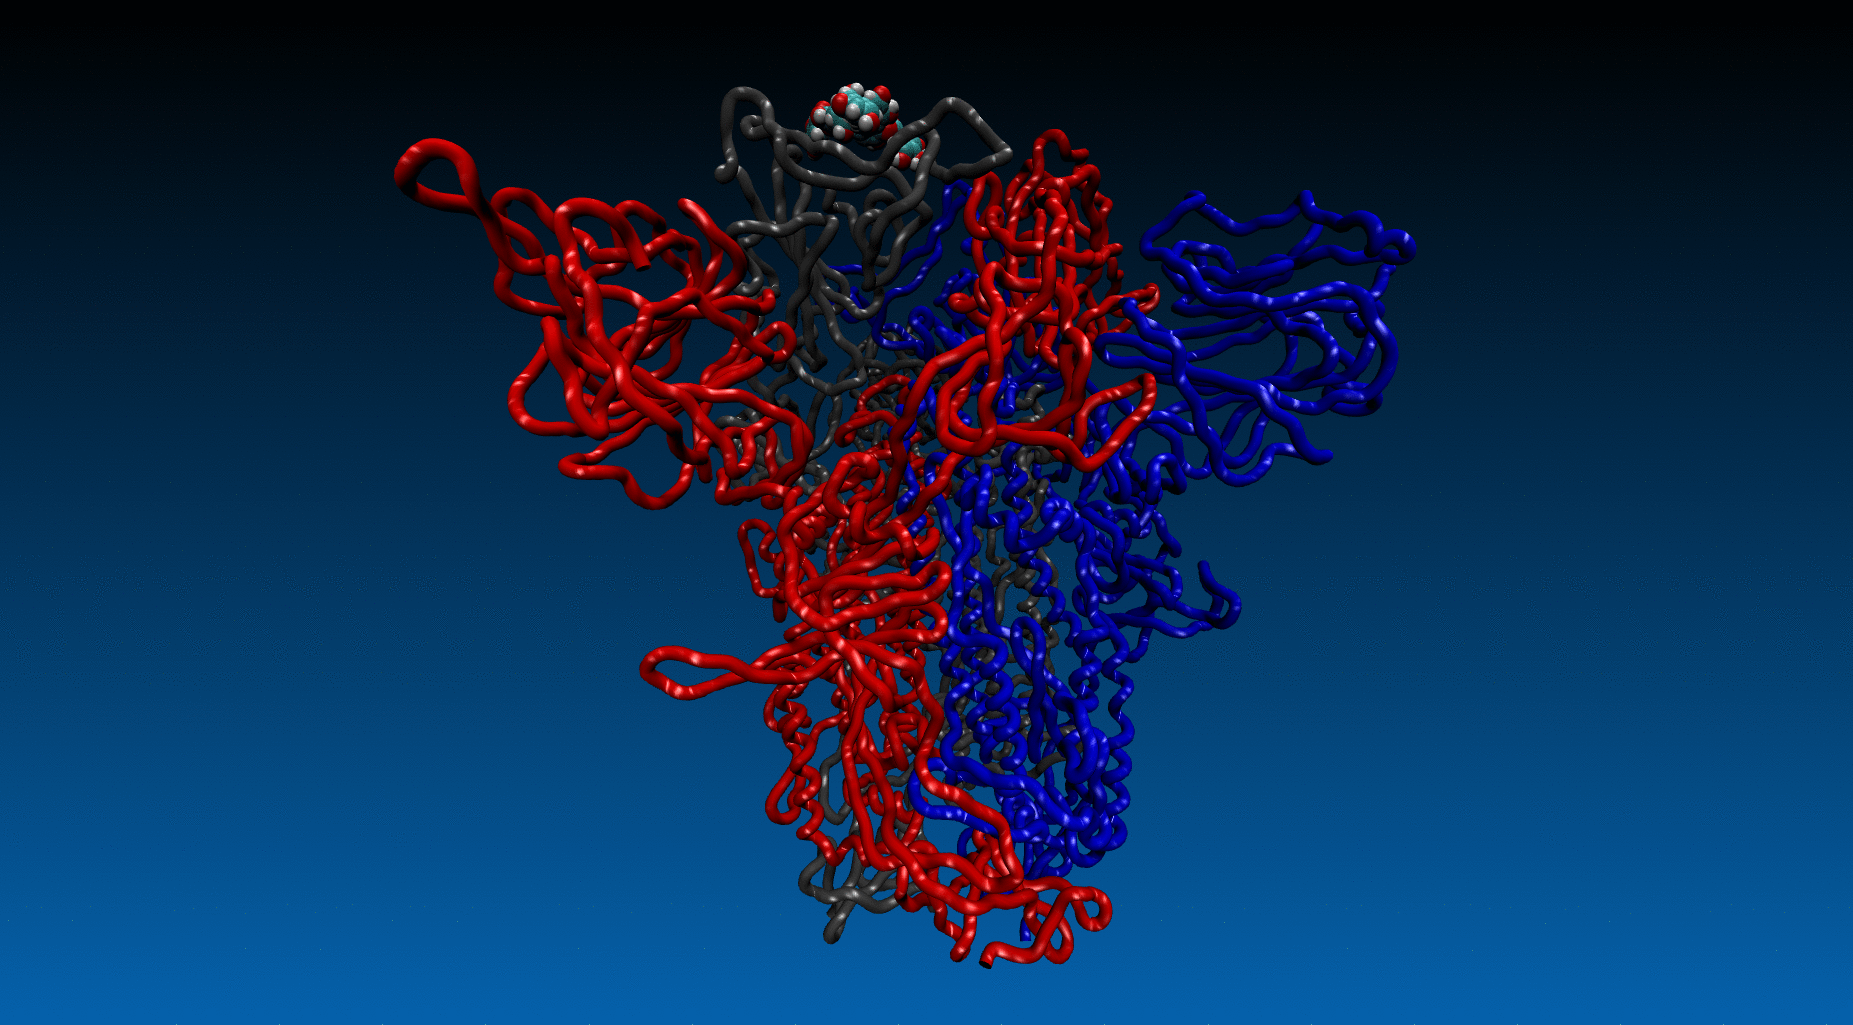

Supplement: Supplementary file 1 [file 2 › tbsd_a_1772885_sm0536.gif]
